# Supplementary material
Source: PubMed Central journal article supplement (PMC6323610)
Supplement: mmc10.pdf [file mmc10.pdf]

# Associations of Mitochondrial and Nuclear Mitochondrial Variants and Genes with Seven Metabolic Traits

Aldi T. Kraja,<sup>1,101,\*</sup> Chunyu Liu,<sup>2,101</sup> Jessica L. Fetterman,<sup>3,101</sup> Mariaelisa Graff,<sup>4,101</sup> Christian Theil Have,<sup>5,101</sup> Charles Gu,<sup>6,101</sup> Lisa R. Yanek,<sup>7</sup> Mary F. Feitosa,<sup>1</sup> Dan E. Arking,<sup>8</sup> Daniel I. Chasman,<sup>9,10</sup> Kristin Young,<sup>4</sup> Symen Ligthart,<sup>11</sup> W. David Hill,<sup>12</sup> Stefan Weiss,<sup>13</sup> Jian'an Luan,<sup>14</sup> Franco Giulianini,<sup>9</sup> Ruifang Li-Gao,<sup>15</sup> Fernando P. Hartwig,<sup>16,17</sup> Shioh J. Lin,<sup>1</sup> Lihua Wang,<sup>1</sup> Tom G. Richardson,<sup>17</sup> Jie Yao,<sup>18</sup> Eliana P. Fernandez,<sup>11</sup> Mohsen Ghanbari,<sup>11</sup> Mary K. Wojczynski,<sup>1</sup> Wen-Jane Lee,<sup>19,20</sup> Maria Argos,<sup>21</sup> Sebastian M. Armasu,<sup>22</sup> Ruteja A. Barve,<sup>23</sup> Kathleen A. Ryan,<sup>24</sup> Ping An,<sup>1</sup> Thomas J. Baranski,<sup>25</sup> Suzette J. Bielinski,<sup>26</sup> Donald W. Bowden,<sup>27</sup> Ulrich Broeckel,<sup>28</sup> Kaare Christensen,<sup>29</sup> Audrey Y. Chu,<sup>9</sup> Janie Corley,<sup>12</sup> Simon R. Cox,<sup>12</sup> Andre G. Uitterlinden,<sup>30</sup> Fernando Rivadeneira,<sup>30</sup> Cheryl D. Cropp,<sup>31</sup> E. Warwick Daw,<sup>1</sup> Diana van Heemst,<sup>32</sup> Lisa de las Fuentes,<sup>33</sup> He Gao,<sup>34</sup> Ioanna Tzoulaki,<sup>34,35</sup> Tarunveer S. Ahluwalia,<sup>36</sup> Renée de Mutser,<sup>15</sup> Leslie S. Emery,<sup>37</sup> A. Mesut Erzurumluoglu,<sup>38</sup> James A. Perry,<sup>24</sup> Mao Fu,<sup>24</sup> Nita G. Forouhi,<sup>14</sup> Zhenglong Gu,<sup>39</sup> Yang Hai,<sup>18</sup> Sarah E. Harris,<sup>40</sup> Gibran Hemani,<sup>17</sup> Steven C. Hunt,<sup>41,42</sup> Marguerite R. Irvin,<sup>43</sup> Anna E. Jonsson,<sup>5</sup> Anne E. Justice,<sup>4,44</sup> Nicola D. Kerrison,<sup>14</sup> Nicholas B. Larson,<sup>26</sup> Keng-Hung Lin,<sup>45</sup> Latisha D. Love-Gregory,<sup>46</sup> Rasika A. Mathias,<sup>7,47</sup> Joseph H. Lee,<sup>48</sup> Matthias Nauck,<sup>49</sup> Raymond Noordam,<sup>32</sup> Ken K. Ong,<sup>14</sup>

(Author list continued on next page)

Mitochondria (MT), the major site of cellular energy production, are under dual genetic control by 37 mitochondrial DNA (mtDNA) genes and numerous nuclear genes (MT-nDNA). In the CHARGE<sub>mtDNA+</sub> Consortium, we studied genetic associations of mtDNA and MT-nDNA associations with body mass index (BMI), waist-hip-ratio (WHR), glucose, insulin, HOMA-B, HOMA-IR, and HbA1c. This 45-cohort collaboration comprised 70,775 (insulin) to 170,202 (BMI) pan-ancestry individuals. Validation and imputation of mtDNA variants was followed by single-variant and gene-based association testing. We report two significant common variants, one in *MT-ATP6* associated ( $p \leq 5E-04$ ) with WHR and one in the *D-loop* with glucose. Five rare variants in *MT-ATP6*, *MT-ND5*, and *MT-ND6* associated with BMI, WHR, or insulin. Gene-based meta-analysis identified *MT-ND3* associated with BMI ( $p \leq 1E-03$ ). We considered 2,282 MT-nDNA candidate gene associations compiled from online summary results for our traits (20 unique studies with 31 dataset consortia's genome-wide associations [GWASs]). Of these, 109 genes associated ( $p \leq 1E-06$ ) with at least 1 of our 7 traits. We assessed regulatory features of variants in the 109 genes, *cis*- and *trans*-gene expression regulation, and performed enrichment and protein-protein interactions analyses. Of the identified mtDNA and MT-nDNA genes, 79 associated with adipose measures, 49 with glucose/insulin, 13 with risk for type 2 diabetes, and 18 with cardiovascular disease, indicating for pleiotropic effects with health implications. Additionally, 21 genes related to cholesterol, suggesting additional important roles for the genes identified. Our results suggest that mtDNA and MT-nDNA genes and variants reported make important contributions to glucose and insulin metabolism, adipocyte regulation, diabetes, and cardiovascular disease.

## Introduction

Mitochondria (MT) are double membraned organelles that generate the majority of cellular adenosine triphosphate (ATP) and metabolites and play a central role in human

health.<sup>1</sup> MT reside within cells and contain a separate maternally inherited<sup>2-5</sup> ~16.6 kb circular mtDNA genome, consisting of 37 genes (Figure 1). The mtDNA encodes 13 core catalytic peptides that form the oxidative phosphorylation complexes (I, III-V) as well as the machinery needed

<sup>1</sup>Division of Statistical Genomics, Department of Genetics, Center for Genome Sciences and Systems Biology, Washington University School of Medicine, St Louis, MO 63110, USA; <sup>2</sup>Department of Biostatistics, Boston University School of Public Health, Boston, MA 02118, USA; <sup>3</sup>Evans Department of Medicine and Whitaker Cardiovascular Institute, Boston University School of Medicine, Boston, MA 02118, USA; <sup>4</sup>Department of Epidemiology, University of North Carolina, Chapel Hill, NC 27516, USA; <sup>5</sup>Novo Nordisk Foundation Center for Basic Metabolic Research, Faculty of Health and Medical Sciences, University of Copenhagen, Copenhagen 2200, Denmark; <sup>6</sup>Division of Biostatistics, Washington University School of Medicine, St Louis, MO 63110, USA; <sup>7</sup>GeneSTAR Research Program, Division of General Internal Medicine, Department of Medicine, Johns Hopkins University School of Medicine, Baltimore, MD 21287, USA; <sup>8</sup>McKusick-Nathans Institute of Genetic Medicine, Johns Hopkins University School of Medicine, Baltimore, MD 21205, USA; <sup>9</sup>Division of Preventive Medicine, Brigham and Women's Hospital, Boston, MA 02115, USA; <sup>10</sup>Harvard Medical School, Boston, MA 02115, USA; <sup>11</sup>Department of Epidemiology, Erasmus University Medical Center, Rotterdam 3015 CE, the Netherlands; <sup>12</sup>Centre for Cognitive Ageing and Cognitive Epidemiology, University of Edinburgh, Department of Psychology, University of Edinburgh, Edinburgh EH8 9JZ, UK; <sup>13</sup>Interfaculty Institute for Genetics and Functional Genomics, University Medicine and University of Greifswald, Greifswald 17475, Germany; <sup>14</sup>MRC Epidemiology Unit, University of Cambridge School of Clinical

(Affiliations continued on next page)

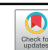

James Pankow,<sup>50</sup> Amit Patki,<sup>51</sup> Alison Pattie,<sup>12</sup> Astrid Petersmann,<sup>49</sup> Qibin Qi,<sup>52</sup> Rasmus Ribel-Madsen,<sup>5,53,54</sup> Rebecca Rohde,<sup>4</sup> Kevin Sandow,<sup>18</sup> Theresia M. Schnurr,<sup>5</sup> Tamar Sofer,<sup>37,55</sup> John M. Starr,<sup>12,56</sup> Adele M. Taylor,<sup>12</sup> Alexander Teumer,<sup>57</sup> Nicholas J. Timpson,<sup>17</sup> Hugoline G. de Haan,<sup>15</sup> Yujie Wang,<sup>4</sup> Peter E. Weeke,<sup>58</sup> Christine Williams,<sup>1</sup> Hongsheng Wu,<sup>59</sup> Wei Yang,<sup>60</sup> Donglin Zeng,<sup>61</sup> Daniel R. Witte,<sup>62</sup> Bruce S. Weir,<sup>37</sup> Nicholas J. Wareham,<sup>14</sup> Henrik Vestergaard,<sup>5,36</sup> Stephen T. Turner,<sup>63</sup> Christian Torp-Pedersen,<sup>64</sup> Evie Stergiakouli,<sup>17</sup> Wayne Huey-Herng Sheu,<sup>65,66,67,68</sup> Frits R. Rosendaal,<sup>15</sup> M. Arfan Ikram,<sup>11</sup> Oscar H. Franco,<sup>11,69</sup> Paul M. Ridker,<sup>9,10</sup> Thomas T. Perls,<sup>70</sup> Oluf Pedersen,<sup>5</sup> Ellen A. Nohr,<sup>71</sup> Anne B. Newman,<sup>72</sup> Allan Linneberg,<sup>73,74,75</sup> Claudia Langenberg,<sup>14</sup> Tuomas O. Kilpeläinen,<sup>5</sup> Sharon L.R. Kardina,<sup>76</sup> Marit E. Jørgensen,<sup>36</sup> Torben Jørgensen,<sup>77,78,79</sup> Thorkild I.A. Sørensen,<sup>80</sup> Georg Homuth,<sup>13</sup> Torben Hansen,<sup>5</sup> Mark O. Goodarzi,<sup>81</sup> Ian J. Deary,<sup>12</sup> Cramer Christensen,<sup>82</sup> Yii-Der Ida Chen,<sup>18</sup> Aravinda Chakravarti,<sup>83</sup> Ivan Brandslund,<sup>84,85</sup> Klaus Bonnelykke,<sup>86,87</sup> Kent D. Taylor,<sup>18</sup> James G. Wilson,<sup>88</sup> Santiago Rodriguez,<sup>17</sup> Gail Davies,<sup>12</sup> Bernardo L. Horta,<sup>16</sup> Bharat Thyagarajan,<sup>89</sup> D.C. Rao,<sup>6</sup> Niels Grarup,<sup>5</sup> Victor G. Davila-Roman,<sup>33</sup> Gavin Hudson,<sup>90</sup> Xiuqing Guo,<sup>18</sup> Donna K. Arnett,<sup>91</sup> Caroline Hayward,<sup>92</sup> Dhananjay Vaidya,<sup>7</sup> Dennis O. Mook-Kanamori,<sup>15,93</sup> Hemant K. Tiwari,<sup>51</sup> Daniel Levy,<sup>94</sup> Ruth J.F. Loos,<sup>95,96,97</sup> Abbas Dehghan,<sup>34</sup> Paul Elliott,<sup>34</sup> Afshan N. Malik,<sup>98</sup> Robert A. Scott,<sup>14</sup> Diane M. Becker,<sup>7</sup> Mariza de Andrade,<sup>22</sup> Michael A. Province,<sup>1,102</sup> James B. Meigs,<sup>55,99,100,102</sup> Jerome I. Rotter,<sup>18,102</sup> and Kari E. North<sup>4,102,\*</sup>

to translate these peptides consisting of 22 transport RNAs (tRNAs) and 2 ribosomal RNAs (rRNAs). In addition, a noncoding sequence, known as the displacement loop (*D-loop*), encompasses the replication origin(s) and promoters for mtDNA.

MT function is also dependent upon many nuclear genes that encode proteins involved in mtDNA transcription, replication, cell apoptosis and mitophagy, nucleotide biosynthesis, metabolism, and iron and calcium homeo-

stasis. Here we evaluate 2,282 candidate nuclear genes that also may contribute to MT function. We refer to these genes as “MT-nDNA candidates,” curated for this study based upon protein co-localization within the MT and text mining.<sup>6–8</sup> Unlike mtDNA-encoded proteins that are transcribed and translated within MT, MT-nDNA genes are translated in the cytoplasm and their proteins are transported into MT through porins or complexes such as translocases.

Medicine, Cambridge CB2 0QQ, UK; <sup>15</sup>Department of Clinical Epidemiology, Leiden University Medical Center, Leiden 2333 ZA, the Netherlands; <sup>16</sup>Post-graduate Program in Epidemiology, Federal University of Pelotas, Pelotas 96020-220, Brazil; <sup>17</sup>MRC Integrative Epidemiology Unit (IEU), Population Health Sciences, University of Bristol, Bristol BS8 2BN, UK; <sup>18</sup>Institute for Translational Genomics and Population Sciences, LABioMed and Department of Pediatrics, at Harbor-UCLA Medical Center, Torrance, CA 90502, USA; <sup>19</sup>Department of Medical Research, Taichung Veterans General Hospital, Taichung 407, Taiwan; <sup>20</sup>Department of Social Work, Tunghai University, Taichung 407, Taiwan; <sup>21</sup>Department of Epidemiology and Biostatistics, University of Illinois at Chicago, Chicago, IL 60612, USA; <sup>22</sup>Division of Biomedical Statistics and Informatics, Department of Health Sciences Research, Mayo Clinic, Rochester, MN 55905, USA; <sup>23</sup>Department of Genetics, Washington University School of Medicine, St Louis, MO 63110, USA; <sup>24</sup>School of Medicine, Division of Endocrinology, Diabetes and Nutrition, and Program for Personalized and Genomic Medicine, University of Maryland School of Medicine, Baltimore, MD 21201, USA; <sup>25</sup>Division of Endocrinology, Metabolism and Lipid Research, Washington University School of Medicine, St. Louis, MO 63110, USA; <sup>26</sup>Department of Health Sciences Research, Mayo Clinic, Rochester, MN 55905, USA; <sup>27</sup>Center for Diabetes Research, Wake Forest School of Medicine, Cincinnatti, OH 45206, USA; <sup>28</sup>Human and Molecular Genetics Center, Medical College of Wisconsin, Milwaukee, WI 53226, USA; <sup>29</sup>The Danish Aging Research Center, University of Southern Denmark, Odense 5000, Denmark; <sup>30</sup>Department of Internal Medicine, Erasmus Medical Center, 3000 CA Rotterdam, the Netherlands; <sup>31</sup>Samford University McWhorter School of Pharmacy, Birmingham, Alabama, Translational Genomics Research Institute (TGen), Phoenix, AZ 35229, USA; <sup>32</sup>Department of Internal Medicine, Section of Gerontology and Geriatrics, Leiden University Medical Center, Leiden 2333 ZA, the Netherlands; <sup>33</sup>Cardiovascular Division, Department of Medicine, Washington University School of Medicine, St Louis, MO 63110, USA; <sup>34</sup>Department of Biostatistics and Epidemiology, MRC-PHE Centre for Environment and Health, School of Public Health, Imperial College London, London W2 1PG, UK; <sup>35</sup>Department of Hygiene and Epidemiology, University of Ioannina, Ioannina 45110, Greece; <sup>36</sup>Steno Diabetes Center Copenhagen, Copenhagen 2820, Denmark; <sup>37</sup>Department of Biostatistics, University of Washington, Seattle, WA 98195, USA; <sup>38</sup>Department of Health Sciences, University of Leicester, Leicester LE1 7RH, UK; <sup>39</sup>Division of Nutritional Sciences, Cornell University, Ithaca, NY 14853, USA; <sup>40</sup>Centre for Cognitive Ageing and Cognitive Epidemiology, University of Edinburgh, Centre for Genomic and Experimental Medicine, Medical Genetics Section, University of Edinburgh, Edinburgh EH4 2XU, UK; <sup>41</sup>Department of Internal Medicine, University of Utah, Salt Lake City, UT 84132, USA; <sup>42</sup>Department of Genetic Medicine, Weill Cornell Medicine, PO Box 24144, Doha, Qatar; <sup>43</sup>Department of Epidemiology, School of Public Health, University of Alabama at Birmingham, Birmingham, AL 35294, USA; <sup>44</sup>Biomedical and Translational Informatics, Geisinger Health, Danville, PA 17822, USA; <sup>45</sup>Department of Ophthalmology, Taichung Veterans General Hospital, Taichung 407, Taiwan; <sup>46</sup>Genomics & Pathology Services, Department of Pathology and Immunology, Washington University School of Medicine, St. Louis, MO 63110, USA; <sup>47</sup>GeneSTAR Research Program, Divisions of Allergy and Clinical Immunology, Department of Medicine, Johns Hopkins University School of Medicine, Baltimore, MD 21287, USA; <sup>48</sup>Taub Institute for Research on Alzheimer disease and the Aging Brain, Columbia University Medical Center, New York, NY 10032, USA; <sup>49</sup>Institute of Clinical Chemistry and Laboratory Medicine, University Medicine Greifswald, Greifswald 17475, Germany; <sup>50</sup>University of Minnesota School of Public Health, Division of Epidemiology and Community Health, Minneapolis, MN 55454, USA; <sup>51</sup>Department of Biostatistics, School of Public Health, University of Alabama at Birmingham, Birmingham, AL 35294, USA; <sup>52</sup>Department of Epidemiology & Population Health, Albert Einstein School of Medicine, Bronx, NY 10461, USA; <sup>53</sup>Department of Endocrinology, Diabetes and Metabolism, Rigshospitalet, Copenhagen University Hospital, 2100 Copenhagen, Denmark; <sup>54</sup>The Danish Diabetes Academy, 5000 Odense, Denmark; <sup>55</sup>Department of Medicine, Harvard Medical School, Boston, MA 02115, USA; <sup>56</sup>Alzheimer Scotland Dementia Research Centre, University of Edinburgh, Edinburgh EH8 9JZ, UK; <sup>57</sup>Institute for Community Medicine, University Medicine Greifswald, 17475 Greifswald, Germany; <sup>58</sup>Department of Cardiology, The Heart Centre, Rigshospitalet, University of Copenhagen, Copenhagen 2100, Denmark; <sup>59</sup>Computer Science and Networking, Wentworth Institute of Technology, Boston, MA 02115, USA;

(Affiliations continued on next page)

The dual genomic origin (mtDNA and MT-nDNA) of MT components and the fact that mtDNA has a much higher mutation rate compared to the nuclear genome<sup>9,10</sup> fuels our hypothesis that MT variants influence individual predisposition to complex diseases.<sup>11,12</sup> Because of heteroplasmy, i.e., the coexistence of mutated and wild-type mtDNA in the same cell, mutations in mtDNA may not result in disease until the copy number of mtDNA carrying the mutation relative to the wild-type mtDNA in the relevant tissue(s) exceeds a threshold.<sup>12</sup> The mtDNA copy number may serve as an indicator of MT function<sup>13</sup> and was recently shown to be associated with overall mortality<sup>14,15</sup> and various metabolic-related diseases, including cardiovascular disease (CVD).<sup>16–18</sup> Studies have also shown that mitochondria have an important influence on multiple cardiovascular disease risk factors. For example, obesity impairs MT biogenesis.<sup>19–21</sup> MT dysfunction has been also implicated in the development of insulin resistance.<sup>22–24</sup> Thus, our study prioritized obesity and insulin resistance pathways to CVD.

In our study we analyzed the dual genomic influence of MT function on seven important metabolic traits (body mass index [BMI], waist-hip ratio [WHR], fasting glucose, fasting insulin, HOMA-B, HOMA-IR, and HbA1c) as major risk factors of cardiovascular disease (CVD) in participants of the CHARGE<sub>mtDNA</sub>+ 45 participating cohorts. The mtDNA associations were evaluated at both the single nucleotide variant (SNV) and at the gene-based levels for

rare alleles (minor allele frequency [MAF] < 1%). The MT-nDNA candidates were studied for function, gene expression regulation, enrichment of pathways, and protein interactions. The overall goal was to illuminate MT-functioning and MT-disease causative variants.

## Subjects and METHODS

### CHARGE Cohorts

There were 45 participating cohorts with a total of 196,967 individuals (166,423 individuals were of the European [EA], 15,745 of African [AA], 1,567 of Asian [ASA], 11,307 of Hispanic/Latinos [HA], and 1,925 of Brazilian ancestry) who had at least one of the seven traits. CHARGE cohort summary descriptions are available online (see Supplemental Study Descriptions). The number of samples available from all cohorts differed by phenotype (Table S1). The resulting samples were smaller within each cohort when association tests were performed (by sub-setting individuals with genotyping available) to a total of 170,202 for BMI, 155,396 for WHR, 79,906K for fasting glucose, 70,778 for fasting insulin, 69,845 for HOMA-B, 69,926 HOMA-IR, and 101,218 for HbA1c. We use the acronym PA to refer to pan-ancestry. The procedures followed were in accordance with the ethical standards of the responsible committee on human experimentation (institutional and national) and that proper informed consent was obtained.

### Trait Harmonization

A total of seven traits were studied: BMI (kg/m<sup>2</sup>), WHR (waist-hip ratio), fasting plasma glucose (mg/dL), fasting insulin (μIU/mL),

<sup>60</sup>Genome Technology Access Center, Washington University School of Medicine, St Louis, MO 63110, USA; <sup>61</sup>Department of Biostatistics, University of North Carolina at Chapel Hill, Chapel Hill, NC 27599, USA; <sup>62</sup>Department of Public Health, Section of Epidemiology, Aarhus University, Denmark, Danish Diabetes Academy, Odense University Hospital, 5000 Odense, Denmark; <sup>63</sup>Division of Nephrology and Hypertension, Department of Cardiovascular Diseases, Mayo Clinic, Rochester, MN 55902, USA; <sup>64</sup>Department of Health Science and Technology, Aalborg University Hospital, Aalborg 9220, Denmark; <sup>65</sup>Division of Endocrinology and Metabolism, Department of Internal Medicine, Taichung Veterans General Hospital, Taichung 407, Taiwan; <sup>66</sup>Institute of Medical Technology, National Chung-Hsing University, Taichung 402, Taiwan; <sup>67</sup>School of Medicine, National Defense Medical Center, Taipei 114, Taiwan; <sup>68</sup>School of Medicine, National Yang-Ming University, Taipei 112, Taiwan; <sup>69</sup>Institute of Social and Preventive Medicine (ISPM), University of Bern, 3012 Bern, Switzerland; <sup>70</sup>Department of Medicine, Geriatrics Section, Boston University School of Medicine and Boston Medical Center, Boston, MA 02118, USA; <sup>71</sup>Research Unit for Gynecology and Obstetrics, Department of Clinical Research, University of Southern Denmark, 5000 Odense, Denmark; <sup>72</sup>Department of Epidemiology, University of Pittsburgh, Pittsburgh, PA 15261, USA; <sup>73</sup>Department of Clinical Experimental Research, Rigshospitalet, Copenhagen 2200, Denmark; <sup>74</sup>Department of Clinical Medicine, Faculty of Health and Medical Sciences, University of Copenhagen, Copenhagen 2200, Denmark; <sup>75</sup>The Center for Clinical Research and Prevention, Bispebjerg and Frederiksberg Hospital, The Capital Region, Copenhagen 2000, Denmark; <sup>76</sup>Department of Epidemiology, School of Public Health, University of Michigan, Ann Arbor, MI 48109, USA; <sup>77</sup>Research Centre for Prevention and Health, Glostrup Hospital, Glostrup 2600, Denmark; <sup>78</sup>Department of Public Health, Faculty of Health Sciences, University of Copenhagen, Copenhagen 1014, Denmark; <sup>79</sup>Faculty of Medicine, Aalborg University, Aalborg 9100, Denmark; <sup>80</sup>Novo Nordisk Foundation Center for Basic Metabolic Research (Section of Metabolic Genetics) and Department of Public Health (Section on Epidemiology), Faculty of Health and Medical Sciences, University of Copenhagen, Copenhagen 2200N, Denmark; <sup>81</sup>Division of Endocrinology, Diabetes, and Metabolism, Department of Medicine, Cedars-Sinai Medical Center, Los Angeles, CA 90048, USA; <sup>82</sup>Department of Internal Medicine, Section of Endocrinology, Vejle Lillebaelt Hospital, 7100 Vejle, Denmark; <sup>83</sup>Center for Complex Disease Genomics, Johns Hopkins University School of Medicine, Baltimore, MD 21205, USA; <sup>84</sup>Department of Clinical Biochemistry, Vejle Hospital, 7100 Vejle, Denmark; <sup>85</sup>Institute of Regional Health Research, University of Southern Denmark, 5000 Odense C, Denmark; <sup>86</sup>Copenhagen Prospective Studies on Asthma in Childhood, Copenhagen University Hospital, Gentofte & Naestved 2820, Denmark; <sup>87</sup>Health Sciences, University of Copenhagen, 2200 Copenhagen, Denmark; <sup>88</sup>Department of Physiology and Biophysics, University of Mississippi Medical Center, Jackson, MS 39216, USA; <sup>89</sup>Department of Laboratory Medicine and Pathology, University of Minnesota, Minneapolis, MN 55455, USA; <sup>90</sup>Wellcome Trust Centre for Mitochondrial Research, Institute of Neuroscience, Newcastle University, Newcastle upon Tyne NE1 3BZ, UK; <sup>91</sup>University of Kentucky, College of Public Health, Lexington, KY 40508, USA; <sup>92</sup>MRC Human Genetics Unit, University of Edinburgh, Institute of Genetics and Molecular Medicine, Western General Hospital, Edinburgh EH4 2XU, UK; <sup>93</sup>Department of Public Health and Primary Care, Leiden University Medical Center, 2333 ZA Leiden, the Netherlands; <sup>94</sup>The Framingham Heart Study, Framingham, MA, USA; The Population Sciences Branch, NHLBI/NIH, Bethesda, MD 20892, USA; <sup>95</sup>Charles Bronfman Institute for Personalized Medicine, Icahn School of Medicine at Mount Sinai, New York, NY 10029, USA; <sup>96</sup>Genetics of Obesity and Related Traits Program, Icahn School of Medicine at Mount Sinai, New York, NY 10029, USA; <sup>97</sup>Mindich Child Health and Development Institute, Icahn School of Medicine at Mount Sinai, New York, NY 10029, USA; <sup>98</sup>King's College London, Department of Diabetes, School of Life Course, Faculty of Life Sciences and Medicine, London SE1 1NN, UK; <sup>99</sup>Division of General Internal Medicine, Massachusetts General Hospital, Boston 02114, MA, USA; <sup>100</sup>Program in Medical and Population Genetics, Broad Institute, Boston, MA 02142, USA

<sup>101</sup>These authors contributed equally to this work

<sup>102</sup>Co-senior author

\*Correspondence: [aldikraja@wustl.edu](mailto:aldikraja@wustl.edu) (A.T.K.), [kari\\_north@unc.edu](mailto:kari_north@unc.edu) (K.E.N.)  
<https://doi.org/10.1016/j.ajhg.2018.12.001>

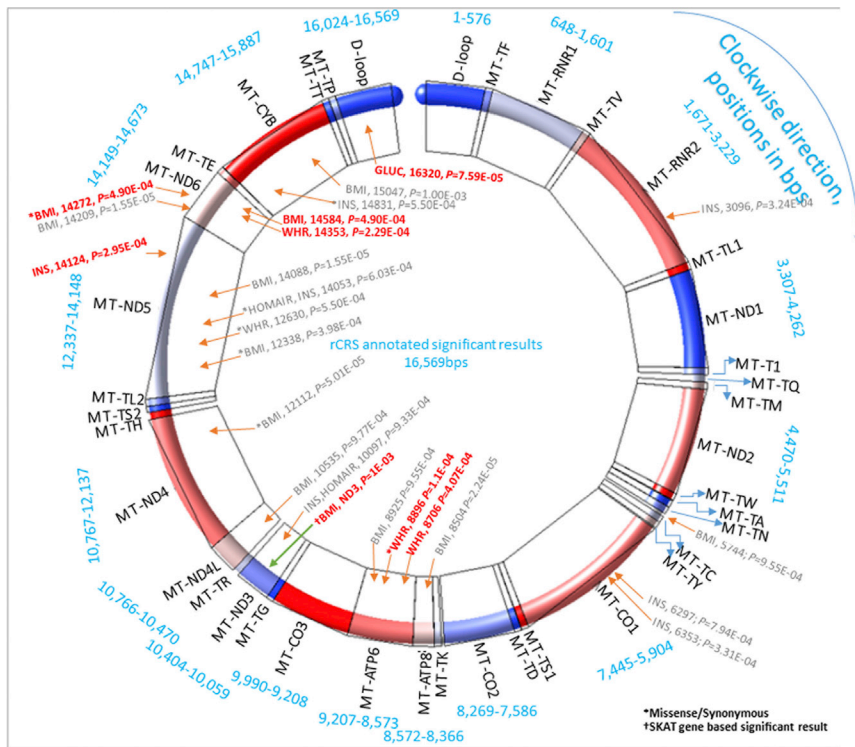

**Figure 1. Graphical Presentation of Single mtDNA- and Gene-Based Association Meta-Analysis Results**

Significant associations (trait, MT position, and p value) at liberal threshold ( $p \leq 1E-03$ ) are annotated with red arrows and gray text for single SNV associations and with green arrow for gene-based association, and text in red color represents SNVs that passed the threshold  $p \leq 5E-04$ . The asterisk (\*) marks missense or synonymous variants; a dagger (†) marks a SKAT gene-based significant association. The mtDNA is shown as one single molecule, by merging all genes from heavy and light MT strands. For visibility, gene colors rotate clockwise from first in blue in the *D-loop* to up to six coloring groups finishing in red at *MT-TL1*, and then recycling again from the first blue color at *MT-ND1*. The full information is summarized in Tables 1, 2, 3, and S2.a-S2.b. In blue text are shown bps-positions of 13 MT-coding genes (*MT-ND1*, *MT-ND2*, *MT-CO1*, *MT-CO2*, *MT-ATP8*, *MT-ATP6*, *MT-CO3*, *MT-ND3*, *MT-ND4L*, *MT-ND4*, *MT-ND5*, *MT-ND6*, *MT-CYB*), 2 MT-ribosomal RNAs (*MT-RNR1* [12S RNA] and *MT-RNR2* [16S RNA]), and 22 transport RNAs (*MT-TE*, *TV*, *TL1*, *T1*, *TQ*, *TM*, *TW*, *TA*, *TN*, *TC*, *TY*, *TS1*, *TD*, *TK*, *TG*, *TR*, *TH*, *TS2*, *TL2*, *TE*, *TT*, *TP*).

HOMA-B, HOMA-IR, and glycated hemoglobin (HbA1c, %) indicative of chronically elevated glucose levels. The homeostasis model assessment was based on plasma levels of fasting glucose and fasting insulin. HOMA-B is an indicator of beta-cell function calculated as  $HOMA-B = (360 \times \text{fasting insulin}) / (\text{fasting glucose} - 60)$ . HOMA-IR is an indicator of insulin resistance calculated as  $HOMA-IR = (\text{fasting glucose} \times \text{fasting insulin}) / 405$ . Glucose and insulin measures were required to have been measured with a minimum fasting time of 8 hr; otherwise, the measure was set to missing. Each study was responsible for ensuring that each trait was normally distributed. Natural-log transformation was implemented for insulin, power transformation was performed when no other solutions were available, and inverse normal transformation was used as a last resort for BMI<sup>25</sup> (details in the Supplemental Material and Methods, section 1). The association test analysis was restricted to non-diabetic participants when studying glycemic traits, by setting values of glucose, insulin, and HbA1c to missing for T2D individuals with HbA1c > 6.5 or with fasting glucose > 126 mg/dL or using T2D medications. The participating cohorts were required to have at least one of the seven studied metabolic traits.

### Preparation of Traits for Analyses

All cohorts used the same units for all traits for the raw measures. We observed differences in the raw measures of traits (Table S1). Thus, to harmonize results, all participating cohorts normalized trait distributions and produced standardized residuals, which are unit-less for each trait. Statistical regression via R / SAS programming languages was used to produce residuals fitting the following model:

$$\text{trait} = \text{age} + \text{age}^2 + \text{sex} + \text{PCs} \\ + \text{other study specific covariates (e.g., study center, etc)}$$

Age<sup>2</sup> was used to remove any age-quadratic trend from the response variable, and principal components (PCs) represent one or more genotype principal components, to minimize population substructure. The standardized residuals from this regression were the final response variables for each trait, used in the association tests with imputed dosages of mtDNA.

### mtDNA Variant Harmonization

All mtDNA variants from each array (Table S14) were annotated to the nucleotide position according to the rCRS of the human mitochondrial DNA prior to analyses (see Web Resources). The probes used for each microarray were obtained from the manufacturer or dbSNP and aligned to the rCRS using Geneious 8.1.<sup>26</sup> All probes were also submitted through the standard nucleotide basic local alignment search tool (BLAST) to ensure the probes bound with high specificity ( $\geq 90\%$  identity) to the mitochondrial genome. In order to limit any potential binding to nuclear DNA segments, probes that bound to nuclear chromosomes with  $\geq 80\%$  matching were excluded from all analyses. The full lists of the validated mtDNA variants are available in the Supplemental Material and Methods, section 2 and Tables S15–S28.

### mtDNA Imputation

The preparation of mtDNA data for imputation was done with PLINK.<sup>27,28</sup> When preparing data for imputation, a few heterozygotes that may have existed in the mtDNA genotypes were set to missing via PLINK. The prephasing of mtDNA scaffold haplotypes at the cohort level was done with SHAPEIT2 for the full mtDNA (see Web Resources).<sup>29</sup> SHAPEIT2 helped to have the mtDNA genotypes of a cohort in the right format to be used in the imputation pipeline with IMPUTE2. SHAPEIT2 was also used for QC checks, such as evaluating missingness in markers. In order to combine

analyses across different genotyping platforms, we performed imputation based on MT-1000G (see [Supplemental Material and Methods](#), section 3). Imputations of mtDNA variants were implemented in IMPUTE2 at the cohort level in a window that included the full MT-chromosome (see [Web Resources](#)).<sup>30</sup> Recoding of genotype probabilities into dosages was implemented via FCGENE (see [Web Resources](#)). Our reference MT-chromosome panel consisted of the 1000G data (PHASE 3, v.5) (see [Web Resources](#)). These data were based on sequence freeze and alignments, using only Illumina platform sequences and only sequences with read lengths of 70 bps or greater. There were 3,617 mtDNA markers in 1000G. The 1000G included 2,504 individuals representing 26 sampled populations (the “Cosmopolitan” reference panel).<sup>31</sup> After imputation, cohorts had differing number of SNVs, up to 3,832 SNVs for BMI, 3,829 for WHR, 3,809 for glucose, 3,801 for insulin, 3,801 for HOMA-B, 3,801 for HOMA-IR, and up to 3,744 for HbA1c. Although the imputation quality was good for most of cohorts (see imputation accuracy in [Table S14](#)), a great number of the SNVs were filtered for INFO (imputation quality) < 0.30, monomorphic or very rare (MAF < 0.0001) at the cohort level before association tests. Other QC were genotype call per cell had to be  $p \geq 0.90$ , a marker was dropped if its missing rate was >0.05 and MAC had to be  $\geq 5$ , (which if it was autosomal could have corresponded to  $MAC \geq 10$ ). The MAC was calculated for haplotypes as  $MAF * N$ . (See [Supplemental Material and Methods](#), section 3 for a more detailed methodology.) After mtDNA imputation, before performing statistical associations, we set any heteroplasmic mutations to missing at the cohort level data. Details of QC via R Package: EasyQC (V10.0)<sup>32</sup> (see [Web Resources](#)) and our internal programs and of the imputation steps can be found in the [Supplemental Material and Methods](#), section 3. All filters implemented at the cohort level created non-uniform contributions of all cohorts in the meta-analysis. Many of the mtDNA variants were rare and per trait meta-analyses QQ-plots often showed an underestimation compared to expected association results ([Figures S1–S7](#)). The rarity of alleles was accompanied with lower quality of imputation and accordingly many of them were removed before any meta-analysis. Most studies had good imputation quality, given the rarity of mtDNA variants.

Variants MT-14272 and MT-14584 are opposite C/T versus T/C, but in full LD, while they are rare. The typical assumption is that rare variants are not in LD, but that does not have to hold for mtDNA. This is one more observation that the rare association findings in this study represent potential associations, until replicated from other future studies.

### mtDNA Association Statistical Analyses

An additive genetic model was applied in association analyses using both self-developed regression models (the linear or linear mixed models written in R programming) and the SKAT (the prepScores() function in seqMeta R package: seqMeta package: Meta-Analysis of Region-Based Tests of Rare DNA Variants approaches<sup>33</sup> (see [Web Resources](#)). Familial and maternal correlation structures<sup>34</sup> were accounted for in the analysis of family data. Details of statistical association models 1–4 are described in the [Supplemental Material and Methods](#), section 4.

### mtDNA Meta-Analyses

Single-variant fixed-effects meta-analyses were conducted with METAL,<sup>35</sup> and gene-based associations were performed in seqMeta (details in the [Supplemental Material and Methods](#), sections 5–7)

([Tables 1, 2, 3, S2.a, S2.b, and S13](#)). The average allele frequency from Metal is an average of allele frequencies for a particular marker as contributed from each study and weighted by each study's sample size as follows:  $Freq1WeightAve = \frac{\sum_{k=1}^S w_k f_k / \sum_{k=1}^S w_k}{\sum_{k=1}^S w_k}$ , where k represents the indexing of contributing studies,  $w_k$  is the sample size (number of individuals) per study, and  $f_k$  is the coded allele frequency for a particular marker from a particular study. Our working group conducted an internal permutation test<sup>36</sup> using ARIC study mtDNA data and determined that 49 independent mitochondrial variants represented an estimate of the number of independent genetic effects for mtDNA. Thus, 49 was used as a denominator for producing the Bonferroni corrected p significance threshold  $\leq 0.05/49 \leq 1E-03$ , a threshold for common variants (MAF  $\geq 1\%$ ), but possibly liberal for rare variants (MAF < 1%) ([Table 1](#)). Furthermore, we considered  $p \leq 0.05/(49 \times 7 \text{ traits}) \leq 1.5E-04$  as a conservative threshold when accounting for seven traits tested. We settled for a Bonferroni-threshold  $p \leq 0.05/(49 \times 2 \text{ domains}) \leq 5E-04$ , because the traits within a domain adipose/obesity (BMI and WHR) and glucose metabolism (glucose, insulin, HOMA-B, HOMA-IR, and HbA1c) are correlated and represent two domains. Because mtDNA is a small genome, the distributions of mtDNA QQ-plots with the existing samples do not always behave similarly to those observed for larger nuclear GWASs. While mtDNA variants MAF  $\geq 1\%$  formed relatively good QQ-plot distributions, the rare variants (MAF < 1%) were sometimes distributed with some deviation in the start (bottom-left) of the QQ-plot, as a result of meta-results in very rare alleles. Thus, the quality control of mtDNA QQ-plots were implemented by filtering at different rare MAF levels. We concluded that with the existing mtDNA meta-analysis results, QQ-plots with MAF > 0.8% were acceptable. Thus, out of 23 SNVs nominally ( $p \leq 1E-03$ ) associated with 6 metabolic traits ([Figure 1](#)), by adding the filter of  $MAC \geq 5$  for each cohort, then 7 variants passed  $p \leq 5E-04$  Bonferroni threshold.

For the gene-based analysis, we used Burden tests which combine the contributions of rare genetic variants within a gene region. Such tests assume similar directionality and effect sizes for each variant.<sup>33</sup> In contrast, the sequence kernel association test (SKAT) for unrelated or family-based studies is an efficient regression-based approach for rare genetic variant analysis.<sup>33,37,38</sup> The meta-analyses were performed using seqMeta (see [Web Resources](#)). The gene-based Bonferroni p value was calculated as  $p \leq 0.05/ (37 \text{ mtDNA genes}) \leq 1E-03$ .

### Identification of MT-nDNA Candidate Genes

We established a list of 2,282 MT-nDNA candidate genes from three sources: (1) Mito Carta 2.0,<sup>6,39</sup> (2) Literature Lab (Acumenta Biotech), and (3) MitoMiner (4.0)<sup>7</sup> (see also [Supplemental Material and Methods](#), section 7). We used the two separate sets of human genes and mouse ortholog genes from MitoCarta. We used Literature Lab to perform a literature search and identified 36 terms based on MeSH mitochondria. From each of the 36 terms ([Table S29](#)), we selected only the upper quartile list of genes from a Log Probability Function - scoring distribution. Each term was tested for association in overlapping with genes in pathway analysis ([Figure S15](#)). We conditioned this list with only genes from human nomenclature and accepted only genes that had more than 15 abstracts cited per selected gene (see [Supplemental Material and Methods](#) section 7).

Using MitoMiner we identified additional MT-nDNA candidate genes. They were filtered with a MT-MitoMiner index  $\geq 0.70$ ,

**Table 1. mtDNA Variants Associated with BMI, WHR, Glucose, Insulin, HOMA-B, HOMA-IR, and HbA1c METAL Meta-Analysis Single-Variant Results**

| No                                                                                                                                     | Pos   | rsID        | Gene    | Annotation | Trait | A1/2 | Freq1 WeightAve | FreqSE | MinFreq | MaxFreq | MAF    | MAC | β(SE)        | P        | Dir   | Het-p    | N      |
|----------------------------------------------------------------------------------------------------------------------------------------|-------|-------------|---------|------------|-------|------|-----------------|--------|---------|---------|--------|-----|--------------|----------|-------|----------|--------|
| <b>Meta-analysis Level Results Selected with MAF of Weighted Allele Average Frequency &gt; 1% and Passing Meta-p-Threshold ≤ 5E-04</b> |       |             |         |            |       |      |                 |        |         |         |        |     |              |          |       |          |        |
| 1                                                                                                                                      | 8706  | -           | MT-ATP6 | -          | WHR   | A/G  | 0.9676          | 0.0295 | 0.9135  | 0.9974  | 0.0324 | 834 | -0.13 (0.04) | 4.1E-04  | ----+ | 9.44E-02 | 25,748 |
| 2                                                                                                                                      | 16320 | rs62581338  | D-loop  | -          | GLUC  | T/C  | 0.0158          | 0.0954 | 0.0028  | 0.2439  | 0.0158 | 301 | -0.21 (0.05) | 7.6E-05  | ----+ | 1.77E-01 | 19,046 |
| <b>Meta-analysis Level Results Selected with MAF of Weighted Allele Average Frequency &lt; 1% and Passing Meta-p-Threshold ≤ 5E-04</b> |       |             |         |            |       |      |                 |        |         |         |        |     |              |          |       |          |        |
| 1                                                                                                                                      | 8896  | rs202120082 | MT-ATP6 | missense   | WHR   | A/G  | 0.0038          | 0.0045 | 0.0003  | 0.0121  | 0.0038 | 134 | 0.30 (0.08)  | 1.12E-04 | +++++ | 8.80E-01 | 34,959 |
| 2                                                                                                                                      | 14124 | -           | MT-ND5  | -          | INS   | T/C  | 0.0035          | 0.0029 | 0.0022  | 0.0087  | 0.0035 | 21  | 0.57 (0.16)  | 2.95E-04 | +++   | 1.62E-01 | 6,035  |
| 3                                                                                                                                      | 14272 | rs2853814   | MT-ND6  | missense   | BMI   | T/C  | 0.0012          | 0.0007 | 0.0009  | 0.0022  | 0.0012 | 17  | 0.84 (0.24)  | 4.90E-04 | ++    | 6.49E-01 | 13,636 |
| 4                                                                                                                                      | 14353 | -           | MT-ND6  | -          | WHR   | T/C  | 0.9916          | 0.0032 | 0.9880  | 0.9978  | 0.0084 | 120 | -0.33 (0.09) | 2.29E-04 | --    | 8.00E-01 | 14,315 |
| 5                                                                                                                                      | 14584 | -           | MT-ND6  | -          | BMI   | T/C  | 0.9988          | 0.0007 | 0.9978  | 0.9991  | 0.0012 | 17  | -0.84 (0.24) | 4.90E-04 | --    | 6.49E-01 | 13,636 |

Abbreviations and definitions: No, order number; Pos, MT position in bps; rsID, rsID name from NCBI dbSNP database when available; Gene, gene name or region; Annotation, role of the variants when available; Trait, one or more of seven traits studied; A1/2, the coded and non-coded alleles; Freq1 WeightAve, a weighted sample size average of allele frequency; FreqSE, standard error of allele frequency; MINFreq, a minimum allele frequency for contributing cohorts; MAXFreq, a maximum allele frequency for contributing cohorts; MAF, minor allele frequency; MAC, minor allele count, calculated as MAF × N; β(SE), beta coefficient and the corresponding standard error; p value, from single variant regression analysis; Dir, direction sign of contributing cohort's beta; Het-p, heterogeneity p value test from METAL; N, individuals' sample contributing in a particular marker meta-analysis (all results are of Pan-Ancestry).

and by selecting the terms “Known mitochondrial” and “Predicted mitochondrial.” In MitoMiner, we kept only genes that were present in human nomenclature. MitoMiner included also the mitochondrial originated genes, which were later removed to keep our MT-nDNA list only of nuclear origin. Finally, three additional genes were added from a publication on MT-defects associated with β-cell dysfunction in a T2D mouse.<sup>40</sup>

### MT-nDNA Candidate Genes Analysis

As a result of the above work, a list of 2,282 MT-nDNA candidate gene labels (Table S30) were used to identify any significant results from 20 GWAS papers full summary results for seven metabolic traits, representing 31 datasets (Tables 4, S4, and S6). For the adipose traits, the GWAS publication full summary results used were for BMI<sup>41-50</sup> and for WHR,<sup>43,44,47-52</sup> and the summary results data were retrieved from the GIANT Consortium repositories (see Web Resources). For glucose metabolism we used the summary results of glucose,<sup>53-56</sup> insulin,<sup>54-59</sup> HOMA-B,<sup>54</sup> and HOMA-IR.<sup>54</sup> These summary results data were retrieved from MAGIC Consortium archives (see Web Resources). For HbA1c we used two resources.<sup>60,61</sup> The published GWASs have large sample sizes, with a BMI study having a maximum of 339K individuals, WHR having 320K, glucose and insulin having 52K and 45K, respectively, HOMA-B and -IR having 46K, and HbA1c having 160K. Consequently, we obtained results for 109 MT-nDNA candidate genes, accompanied by 588 sentinel significant SNVs (one best per gene and trait combination, out of seven traits, Tables 4, S6, and S9).

To identify the 588 SNVs, a pre-specified selection process was followed. First, we downloaded the latest dbSNP of NCBI reference data (batch 150), and we assigned each SNV to a gene (pseudo-genes excluded). The intergenic variants were assigned to the closest gene, up to half the distance between two genes. Then, we merged the 31 full-GWAS sets to the annotated dbSNP, thus each GWAS-SNP was assigned to a gene. Each summary result was merged with MT-nDNA gene labels (Table S30). The corresponding significant SNVs results, ones with the smallest p value, per gene and per trait, were accepted in the final list ( $p < 0.05 / (2,282 \times 7) = 3.13E-06$ ). After this selection, we also performed an analysis based on 1000 Genomes to identify the number of independent SNVs within a gene.<sup>36,62</sup> The analysis produced a mean of independent SNVs per gene of 59, median of 38, and with a maximum of two outliers 542 (*WVWX* [MIM: 605131]) and 499 (*FHIT* [MIM: 601153]). If it was a gene-based test, then a conservative threshold  $p \leq 0.05 / (542 \times 7 \text{ traits}) \leq 1.3E-05$  could have been used, which is larger than the threshold we used,  $p \leq 1E-06$ . Furthermore, to compare whether our MT-nDNA genes pass the genome-wide threshold of  $p \leq 5E-08$ , generally used in GWAS publications, we merged our gene data with all possible reported SNVs from the GWAS-Catalog (accessed 01.27.2018, Table S12 and presented findings in the Results and Discussion paragraphs).

### Annotation, Enrichment Analysis, and Gene Expression and Regulation

The mtDNA as well as MT-nDNA significant variants were annotated to NCBI dbSNP build 150 (HG38); genes and their protein biological functions were annotated to NCBI Entrez Gene, GeneCards and UniProtKB; enrichment analyses were performed with MetaCore and Literature Lab; pathways with KEGG and Reactome; gene expression and regulation were assessed using

**Table 2. Results of mtDNA Gene-Based Meta-analysis SKAT T1 and T5 Test ( $p \leq 0.01$ )**

| Trait  | Ancestry | T    | Gene    | p       | Qmeta    | cMAF  | nSNVs |
|--------|----------|------|---------|---------|----------|-------|-------|
| HOMA-B | PA       | 0.01 | MT-TF   | 5.0E-03 | 4604374  | 0.022 | 5     |
| HOMA-B | PA       | 0.05 | MT-TV   | 8.0E-03 | 3341460  | 0.078 | 6     |
| HbA1c  | EA       | 0.05 | MT-TG   | 9.0E-03 | 13674145 | 0.064 | 13    |
| BMI    | PA       | 0.05 | MT-TQ   | 1.0E-02 | 21201188 | 0.075 | 12    |
| HOMA-B | PA       | 0.05 | MT-RNR1 | 1.0E-02 | 69787232 | 1.323 | 119   |

Abbreviations and definitions: Trait, the trait used for a specific test; PA, Pan ancestry; EA, European ancestry; T, MAF-value threshold for selecting SNVs to be included in the gene-based association test; Gene, gene name from mtDNA; p, p value from the SKAT test; Qmeta, the SKAT Q statistics;  $Q = \sum_j w_j^2 U_j^2$ , where  $w$  is a weight for SNV; and  $U_j$  is associated score statistics; cMAF, cumulative minor allele frequency; nSNVs, the number of SNVs used in the gene-based meta-analysis.

HaploReg, RegulomeDB, GTEx, and Human Protein Atlas; and protein interactions were assessed using STRING and NCBI summary of interactions from other databases (see [Web Resources](#)), with references to databases BIND, BioGRID, EcoCyc, HIV-1-human protein interaction data, and HPRD. Specifically, for GTEx gene expression eQTL analysis, the eSNVs were considered significant when the eSNV had a GTEx  $p < 1E-07$  and was in high LD ( $r^2 \geq 0.80$ ) with the best eSNV of the target gene. Depending on  $r^2 \geq 0.80$  to 1, we called them similar to “lead” or “lead” eSNVs. Otherwise, if the LD  $r^2$  was  $< 0.02$  to the target gene’s best eSNV, we called them “secondary” eSNVs ([Table S8](#)). Details of the resources and the corresponding references are provided in the [Supplemental Material and Methods](#), sections 8 and 9. We have cited throughout the manuscript the corresponding gene MIM number from the Online Mendelian Inheritance in Man (see [Web Resources](#)).

## Results

We evaluated the associations of mtDNA variants with seven key metabolic traits in meta-analyses of 45 cohorts (with up to  $N \sim 170,202$ ). For details on the harmonization of the phenotypes and genotypes, see [Material and Methods](#) and [Supplemental Material and Methods](#), sections 1–6. The [Supplemental Study Descriptions](#) and [Table S1](#) with BMI mean and standard deviation values give a depiction of each contributing cohort in this study.

### mtDNA Single-Variants Associations

Seven SNVs, two variants with average weighted MAF  $> 1\%$  ([Tables 1](#) and [S2.a](#) and [Figures S1–S7](#)) and five with MAF  $< 1\%$  ([Tables 1](#) and [S2.b](#)) displayed statistically significant evidence of association with six metabolic traits (Bonferroni threshold  $p \leq 5E-04$ , see in [Material and Methods: mtDNA Meta-Analyses](#)). MT-8706 in *MT-ATP6* (MIM: 516060) (see [Web Resources](#)), associated with WHR (with sample weighted average of cohorts’ MAF = 3.24%,  $p = 4.1E-04$ ) and MT-16320 (rs62581338) of the *D-loop* (with sample weighted average of cohorts’ MAF = 1.58%,  $p = 7.6E-05$ ) associated with fasting glucose. The five rare variants were MT-8896 (rs202120082, missense) in *MT-ATP6* associated with WHR, MT-14124 in *MT-ND5* (MIM: 516005) associated with fasting plasma insulin, MT-14272 in *MT-ND6* (rs2853814 [MIM: 516006],

missense) associated with BMI, MT-14353 in *MT-ND6* associated with WHR, and MT-14584 in *ND6* associated with BMI.

The evidence of association by cohort is reported in [Tables S2.a, S2.b, and S3](#). Typically, the cohort with a large sample size displayed the strongest evidence of association. For example, the HCHS/SOL study contributed disproportionately to several mtDNA-trait associations (see in the [Supplemental Study Descriptions](#), [CHARGEmtDNA+ Study Description](#)). Even further, for the *MT-ATP6* (position 8706) association with WHR, the strongest association in HCHS/SOL was in those of Central/South American background (so more Native American ancestry as compared to African American ancestry, [Tables S2.a and S3](#)).

### mtDNA Rare Variants Gene-Based Associations

The mitochondrial rare variants for gene-based analysis were mapped to the start and end positions of each gene from the NCBI Reference Sequence GenBank: NC\_012920.1 (see [Web Resources](#)). The rare variant gene-based meta-analysis using SKAT did not yield any significant associations. In contrast, the Burden test yielded a significant association between rare variants in *MT-ND3* and BMI ( $p = 1E-03$ ,  $T < 0.05$  including 82 SNVs). A forest plot representing the 82 SNVs and the overall MT-ND3-overall meta is shown in [Figure S17](#). Several gene-HOMA-B, HbA1c, and BMI associations were suggestively significant employing both the SKAT and Burden approaches (MT-RNAs *MT-TF* [MIM: 590070], *MT-TV* [MIM: 590105], *MT-TG* [MIM: 590035], *MT-TQ* [MIM: 590030], and *MT-RNR1* [MIM: 561000];  $p \leq 1E-02$ ; [Tables 2](#) and [3](#)). A total of 131 (T5-test) and 123 (T1-test) low-frequency and/or rare variants contributed to T5-test and T1-test, respectively. We used two gene-based approaches, burden test and sequence kernel association test (SKAT), to evaluate the association between a gene and a phenotype. Burden tests access the cumulative effects of multiple variants by assuming that all variants have the same directionality in a genetic region. SKAT tests use a score-based variance component framework without assuming that all variants have the same directionality. Although the two methods are different, they all evaluate aggregate effects of multiple low-frequency and/or rare variants

**Table 3. Results of mtDNA Gene-Based Burden T1 and T5 Meta-Analysis Test ( $p \leq 0.01$ )**

| Trait  | Ancestry | T    | Gene    | p       | Beta  | SE    | cMAFUsed | nSNVs |
|--------|----------|------|---------|---------|-------|-------|----------|-------|
| BMI    | PA       | 0.05 | MT-ND3  | 1.0E-03 | 0.007 | 0.002 | 0.290    | 82    |
| BMI    | PA       | 0.05 | MT-TQ   | 2.0E-03 | 0.020 | 0.006 | 0.075    | 12    |
| BMI    | PA       | 0.05 | MT-CO2  | 5.0E-03 | 0.003 | 0.001 | 0.491    | 155   |
| HOMAB  | PA       | 0.01 | MT-TF   | 5.0E-03 | 0.038 | 0.014 | 0.022    | 5     |
| HOMAB  | PA       | 0.01 | MT-TV   | 6.0E-03 | 0.088 | 0.032 | 0.009    | 2     |
| HOMAB  | PA       | 0.05 | MT-RNR1 | 7.0E-03 | 0.002 | 0.001 | 1.323    | 119   |
| HOMAIR | EA       | 0.05 | MT-TG   | 7.0E-03 | 0.027 | 0.010 | 0.061    | 13    |
| BMI    | EA       | 0.05 | MT-ND3  | 7.0E-03 | 0.006 | 0.002 | 0.194    | 81    |
| HOMAB  | PA       | 0.05 | MT-TV   | 8.0E-03 | 0.031 | 0.011 | 0.078    | 6     |
| BMI    | EA       | 0.05 | MT-TQ   | 8.0E-03 | 0.018 | 0.007 | 0.064    | 12    |
| HOMAB  | EA       | 0.05 | MT-RNR1 | 9.0E-03 | 0.002 | 0.001 | 1.287    | 120   |
| HOMAB  | EA       | 0.05 | MT-TF   | 9.0E-03 | 0.018 | 0.007 | 0.127    | 10    |
| HOMAB  | EA       | 0.05 | MT-TV   | 9.0E-03 | 0.030 | 0.011 | 0.079    | 6     |
| HOMAB  | EA       | 0.01 | MT-RNR1 | 1.0E-02 | 0.003 | 0.001 | 0.292    | 61    |

Abbreviations and definitions: Trait, the trait used for a specific test; PA, Pan ancestry; EA, European ancestry; T, MAF-value threshold for selecting SNVs to be included in the gene-based-burden association test; Gene, gene name from mtDNA; p, p value from the gene-based burden test; the score test of the weighted sum of genotypes has the form of statistic,  $T = \sum_j w_j U_j$ , where  $w$  is a weight for SNV $_i$  and  $U_j$  is the score statistic for SNV $_i$ ; Beta and SE are result of regressing the trait on a weighted sum of genotypes; cMAFUsed, cumulative minor allele frequency; nSNVs, the number of SNVs used in the gene-based burden meta-analysis.

with a phenotype. A significant gene-test reflects an aggregate effect of multiple variants in the same area. If most variants in *ND6* are not associated with the phenotype, the gene-based test might not be significant. Although statistical significance was not achieved, the association of MT-ND6 with BMI was suggestive in the burden ( $p = 0.06$  [T5] and  $0.04$  [T1]) and SKAT ( $p = 0.15$  [T5] and  $0.08$  [T1] tests).

#### Identification of MT-nDNA Candidate Variants Associated with Metabolic Traits

We identified 2,282 MT-nDNA candidate genes (see [Material and Methods](#)) and assessed their association from 20 GWASs with 31 datasets ([Table S4](#)). From the MT-nDNA candidate list, 109 genes reached statistical significance following correction for multiple testing (Bonferroni  $p < 1E-06$ ) of which 46 were associated with BMI, 2 with extreme obesity, 26 with WHR, 18 with glucose, 7 with insulin, 1 with HOMA-B, 1 with HOMA-IR, and 20 with HbA1c, totaling 121 associations ([Table 4](#)). The use of additional SNVs belonging to the same 109 MT-nDNA genes, but now sourced from the GWAS catalog for the same 7 traits or any other traits, indicated that 84% (27% improvement) of MT-nDNA genes passed  $p \leq 5E-08$ , while 16% remained at  $p \leq 1E-06$  without passing the  $p \leq 5E-08$  threshold. Of the MT-nDNA associations, *GCK* (MIM: 138079), *MRPL33* (MIM: 610059), *PPARG* (MIM: 601487), *SLC2A2* (MIM: 138160), *AMBRA1* (MIM: 611359), *NR1H3* (MIM: 602423), *MTCH2* (MIM: 613221), *IGF1* (MIM: 147440), and *BCL2* (MIM: 151430) were associated with more than one trait ([Figures 2, 3,](#)

[S8,](#) and [S9](#)). For example, the well-known *GCK* is a member of hexokinases that phosphorylates glucose to produce glucose-6-phosphate, the first step in most glucose metabolism pathways, and has pleiotropic effects (see [Discussion](#)).

#### Enrichment Analysis of MT-nDNA Candidate Genes

The 109 MT-nDNA selected genes are candidates for MT function based on their protein localization in mitochondria, as well as from mining the published literature ([Table S5](#)). We used Literature Lab and MetaCore software and the corresponding databases to perform enrichment analyses, which provided information for MT-nDNA gene-label relations with terms, pathways, diseases, gene ontology processes, and clustering (see [Supplemental Material and Methods](#), section 8 and [Figure S10](#)). When comparing the 109 MT-nDNA candidate genes versus the remaining 2,173 (2,282 - 109), the 109 set showed enrichment ( $p = 1.7E-12$ ) for “Signal transduction, Neuropeptide signaling pathways,” which included, among others, *POMC* (MIM: 176830) and *MC4R* (MIM: 155541), while no such enrichment was found for the 2,173 set. Out of 109 MT-nDNA candidate genes, 21 of the significantly associated genes were functionally related with cholesterol ([Table S6](#) and [Figure S11](#)), 13 with glucose and insulin, and 5 with adipose/obesity. Of the 109 MT-nDNA genes, 13 associated with the “Type 2 diabetes”<sup>54,61,63</sup> term ([Table S7](#)) while 18 were associated with “Cardiovascular disease”<sup>64-77</sup> ([Table S7](#)). (For space limitation, a detailed enrichment analysis is provided in the [Supplemental Material and Methods](#), section 8.) These



**Table 4. GWAS Findings for Seven Traits (BMI, WHR, Glucose, Insulin, HOMA-B, HOMA-IR, HbA1c) for 109 MT-nDNA Candidate Genes**

| No | SNV        | Chrom | Position  | Role          | Gene    | Full Gene Name (Cytogenetic Position)                                                                                     | BMI p    | OBESITY p | WHR p    | GLUC p   | INS p    | HOMA-B p | HOMAIR p | HbA1c p  |
|----|------------|-------|-----------|---------------|---------|---------------------------------------------------------------------------------------------------------------------------|----------|-----------|----------|----------|----------|----------|----------|----------|
| 1  | rs622798   | 1     | 45549599  | upstream-2 kb | AKR1A1  | Aldo-Keto Reductase Family 1 Member A1 (1p34.1)                                                                           | 8.56E-07 | -         | -        | -        | -        | -        | -        | -        |
| 2  | rs1280316  | 1     | 66843725  | Intron        | WDR78   | WD repeat domain 78 (1p31.3)                                                                                              | 6.81E-07 | -         | -        | -        | -        | -        | -        | -        |
| 3  | rs1093013  | 1     | 75634658  | Intron        | SLC44A5 | Solute carrier family 44 member 5 (1p31.1)                                                                                | -        | -         | 4.86E-17 | -        | -        | -        | -        | -        |
| 4  | rs6428792  | 1     | 119114244 | Intron        | WARS2   | Tryptophanyl TRNA Synthetase 2, Mitochondrial (1p12)                                                                      | -        | -         | 7.95E-18 | -        | -        | -        | -        | -        |
| 5  | rs2301453  | 1     | 172389027 | Intron        | DNM3    | Dynamin 3 (1q24.3)                                                                                                        | -        | -         | 4.38E-17 | -        | -        | -        | -        | -        |
| 6  | rs4844390  | 1     | 207761504 | Intron        | CD46    | CD46 Molecule, Complement Regulatory Protein (1q32.2)                                                                     | -        | -         | -        | -        | -        | -        | -        | 6.90E-07 |
| 7  | rs11118296 | 1     | 219408638 | Intron        | LYPLAL1 | Lysophospholipase Like 1 (1q41)                                                                                           | -        | -         | 3.00E-07 | -        | -        | -        | -        | -        |
| 8  | rs6713865  | 2     | 23676937  | Intron        | KLHL29  | Kelch like family member 29 (2p24.1)                                                                                      | -        | -         | -        | -        | -        | -        | -        | 4.39E-13 |
| 9  | rs934778   | 2     | 25166355  | Intron        | POMC    | Proopiomelanocortin (2p23.3)                                                                                              | 7.15E-07 | -         | -        | -        | -        | -        | -        | -        |
| 10 | rs1107238  | 2     | 26235376  | Intron        | HADHA   | Hydroxyacyl-CoA Dehydrogenase/3-Ketoacyl-CoA Thiolase/Enoyl-CoA Hydratase (Trifunctional Protein), Alpha Subunit (2p23.3) | 8.86E-07 | -         | -        | -        | -        | -        | -        | -        |
| 11 | rs13404446 | 2     | 27296386  | intron        | TRIM54  | Tripartite Motif Containing 54 (2p23.3)                                                                                   | -        | -         | -        | 3.09E-09 | -        | -        | -        | -        |
| 12 | rs4665965  | 2     | 27313513  | intron        | MPV17   | MPV17, Mitochondrial Inner Membrane Protein (2p23.3)                                                                      | -        | -         | -        | 1.83E-09 | -        | -        | -        | -        |
| 13 | rs3736594  | 2     | 27772914  | intron        | MRPL33  | Mitochondrial Ribosomal Protein L33 (2p23.2)                                                                              | -        | -         | -        | 3.02E-13 | 4.67E-07 | -        | -        | -        |
| 14 | rs4346434  | 2     | 43992607  | intron        | LRPPRC  | Leucine Rich Pentatricopeptide Repeat Containing (2p21)                                                                   | -        | -         | 8.52E-08 | -        | -        | -        | -        | -        |
| 15 | rs16843390 | 2     | 209655109 | intron        | MAP2    | Microtubule Associated Protein 2 (2q34)                                                                                   | -        | -         | -        | 3.32E-08 | -        | -        | -        | -        |
| 16 | rs715      | 2     | 210678331 | utr-3-prime   | CPS1    | Carbamoyl-Phosphate Synthase 1 (2q34)                                                                                     | 5.81E-07 | -         | -        | -        | -        | -        | -        | -        |
| 17 | rs933994   | 2     | 218785893 | intron        | CYP27A1 | Cytochrome P450 Family 27 Subfamily A Member 1 (2q35)                                                                     | 8.65E-07 | -         | -        | -        | -        | -        | -        | -        |
| 18 | rs17036328 | 3     | 12348985  | intron        | PPARG   | Peroxisome Proliferator Activated Receptor Gamma (3p25.2)                                                                 | 4.27E-07 | -         | -        | -        | 3.59E-12 | -        | -        | -        |

(Continued on next page)

**Table 4. Continued**

| No | SNV        | Chrom | Position  | Role          | Gene     | Full Gene Name (Cytogenetic Position)                               | BMI p    | OBESITY p | WHR p    | GLUC p   | INS p | HOMA-B p | HOMA1R p | HbA1c p  |
|----|------------|-------|-----------|---------------|----------|---------------------------------------------------------------------|----------|-----------|----------|----------|-------|----------|----------|----------|
| 19 | rs3729931  | 3     | 12585017  | intron        | RAF1     | Raf-1 Proto-Oncogene, Serine/Threonine Kinase (3p25.2)              | -        | -         | 3.60E-10 | -        | -     | -        | -        | -        |
| 20 | rs11715915 | 3     | 49417897  | nc-transcript | AMT      | Aminomethyltransferase (3p21.31)                                    | -        | -         | -        | 4.90E-08 | -     | -        | -        | -        |
| 21 | rs12489828 | 3     | 52532998  | intron        | NT5DC2   | 5'-Nucleotidase Domain Containing 2 (3p21.1)                        | -        | -         | 2.60E-10 | -        | -     | -        | -        | -        |
| 22 | rs2365389  | 3     | 61250788  | intron        | FHIT     | Fragile Histidine Triad (3p14.2)                                    | 3.75E-15 | -         | -        | -        | -     | -        | -        | -        |
| 23 | rs332375   | 3     | 66377079  | intron        | SLC25A26 | Solute Carrier Family 25 Member 26 (3p14.1)                         | -        | -         | 7.33E-07 | -        | -     | -        | -        | -        |
| 24 | rs1735536  | 3     | 128377770 | intron        | EEFSEC   | Eukaryotic Elongation Factor, Selenocysteine-TRNA Specific (3q21.3) | 2.95E-10 | -         | -        | -        | -     | -        | -        | -        |
| 25 | rs9844666  | 3     | 136255374 | intron        | PCCB     | Propionyl-CoA Carboxylase Beta Subunit (3q22.3)                     | 7.22E-07 | -         | -        | -        | -     | -        | -        | -        |
| 26 | rs11924648 | 3     | 171000207 | intron        | SLC2A2   | Solute Carrier Family 2 Member 2 (3q26.2)                           | -        | -         | -        | 1.02E-17 | -     | -        | -        | 4.05E-09 |
| 27 | rs10012946 | 4     | 6291623   | intron        | WFS1     | Wolfram ER Transmembrane Glycoprotein (4p16.1)                      | -        | -         | -        | 4.17E-07 | -     | -        | -        | -        |
| 28 | rs10518406 | 4     | 122841742 | intron        | FGF2     | Fibroblast Growth Factor 2 (4q28.1)                                 | 6.50E-07 | -         | -        | -        | -     | -        | -        | -        |
| 29 | rs1458758  | 4     | 122914724 | intron        | NUDT6    | Nudix Hydrolase 6 (4q28.1)                                          | -        | -         | 6.22E-08 | -        | -     | -        | -        | -        |
| 30 | rs303084   | 4     | 123145793 | intron        | SPATA5   | Spermatogenesis associated 5 (4q28.1)                               | -        | -         | 3.40E-07 | -        | -     | -        | -        | -        |
| 31 | rs12654264 | 5     | 75352778  | intron        | HMGCR    | 3-Hydroxy-3-Methylglutaryl-CoA Reductase (5q13.3)                   | 1.81E-08 | -         | -        | -        | -     | -        | -        | -        |
| 32 | rs10478424 | 5     | 119453325 | intron        | HSD17B4  | Hydroxysteroid 17-Beta Dehydrogenase 4 (5q23.1)                     | -        | -         | 1.40E-07 | -        | -     | -        | -        | -        |
| 33 | rs2881156  | 5     | 135812973 | intron        | SLC25A48 | Solute carrier family 25 member 48 (5q31.1)                         | -        | 8.10E-07  | -        | -        | -     | -        | -        | -        |
| 34 | rs3828870  | 6     | 16743066  | intron        | ATXN1    | Ataxin 1 (6p22.3)                                                   | -        | -         | -        | -        | -     | -        | -        | 5.52E-07 |
| 35 | rs1800562  | 6     | 26092913  | intron        | HFE      | Hemochromatosis (6p22.2)                                            | -        | -         | -        | -        | -     | -        | -        | 4.67E-28 |
| 36 | rs1800629  | 6     | 31575254  | upstream-2KB  | TNF      | Tumor necrosis factor (6p21.33)                                     | -        | -         | 7.30E-07 | -        | -     | -        | -        | -        |
| 37 | rs6457796  | 6     | 34860776  | intron        | UHRF1BP1 | UHRF1 binding protein 1 (6p21.31)                                   | 1.15E-09 | -         | -        | -        | -     | -        | -        | -        |

(Continued on next page)

**Table 4. Continued**

| No | SNV        | Chrom | Position  | Role            | Gene    | Full Gene Name (Cytogenetic Position)                           | BMI p    | OBESITY p | WHR p    | GLUC p   | INS p | HOMA-B p | HOMA1R p | HbA1c p  |
|----|------------|-------|-----------|-----------------|---------|-----------------------------------------------------------------|----------|-----------|----------|----------|-------|----------|----------|----------|
| 38 | rs10434    | 6     | 43785475  | utr-3-prime     | VEGFA   | Vascular endothelial growth factor A (6p21.1)                   | –        | –         | 8.80E–07 | –        | –     | –        | –        | –        |
| 39 | rs1049354  | 6     | 88143732  | utr-3-prime     | CNR1    | Cannabinoid receptor 1 (6q15)                                   | 9.57E–07 | –         | –        | –        | –     | –        | –        | –        |
| 40 | rs9400239  | 6     | 108656460 | intron          | FOXO3   | Forkhead box O3 (6q21)                                          | 1.61E–08 | –         | –        | –        | –     | –        | –        | –        |
| 41 | rs1273733  | 6     | 121131419 | downstream-500B | TBC1D32 | TBC1 domain family member 32 (6q22.31)                          | 3.96E–12 | –         | –        | –        | –     | –        | –        | –        |
| 42 | rs1049349  | 6     | 121449496 | utr-3-prime     | GJA1    | Gap junction protein alpha 1; synonymous: CX43 (6q22.31)        | 4.18E–15 | –         | –        | –        | –     | –        | –        | –        |
| 43 | rs1293954  | 6     | 151669826 | intron          | ESR1    | Estrogen receptor 1 (6q25.1-q25.2)                              | 4.41E–09 | –         | –        | –        | –     | –        | –        | –        |
| 44 | rs1203576  | 7     | 40808233  | intron          | SUGCT   | <i>C7orf10</i> (Succinyl-CoA:Glutarate-CoA Transferase, 7p14.1) | 1.48E–10 | –         | –        | –        | –     | –        | –        | –        |
| 45 | rs2908289  | 7     | 44184343  | intron          | GCK     | Glucokinase (7p13)                                              | –        | –         | –        | 3.32E–88 | –     | 6.00E–09 | –        | 2.24E–19 |
| 46 | rs1088867  | 7     | 44705214  | intron          | OGDH    | Oxoglutarate dehydrogenase (7p13)                               | 7.90E–08 | –         | –        | –        | –     | –        | –        | –        |
| 47 | rs16892421 | 8     | 106499705 | intron          | OXR1    | Oxidation resistance 1 (8q23.1)                                 | –        | –         | 6.94E–07 | –        | –     | –        | –        | –        |
| 48 | rs7835803  | 8     | 120030213 | intron          | DEPTOR  | DEP domain containing MTOR interacting protein (8q24.12)        | –        | –         | –        | 4.97E–07 | –     | –        | –        | –        |
| 49 | rs2777795  | 9     | 104910084 | intron          | ABCA1   | ATP binding cassette subfamily A member 1 (9q31.1)              | –        | –         | 3.13E–08 | –        | –     | –        | –        | –        |
| 50 | rs7023913  | 9     | 128255683 | downstream-500B | DNM1    | Dynamin 1 (9q34.11)                                             | –        | 7.30E–07  | –        | –        | –     | –        | –        | –        |
| 51 | rs3829109  | 9     | 136362314 | intron          | DNLZ    | DNL-Type Zinc Finger (9q34.3)                                   | –        | –         | –        | 1.13E–10 | –     | –        | –        | –        |
| 52 | rs1244497  | 10    | 7838019   | intron          | TAF3    | TATA-box binding protein associated factor 3 (10p14)            | 1.84E–11 | –         | –        | –        | –     | –        | –        | –        |
| 53 | rs5030913  | 10    | 69246375  | intron          | HKDC1   | Hexokinase domain containing 1 (10q22.1)                        | –        | –         | –        | –        | –     | –        | –        | 3.56E–13 |
| 54 | rs4745982  | 10    | 69330087  | intron          | HK1     | Hexokinase 1 (10q22.1)                                          | –        | –         | –        | –        | –     | –        | –        | 2.87E–65 |
| 55 | rs7899106  | 10    | 85651147  | intron          | GRID1   | Glutamate Ionotropic Receptor Delta Type Subunit 1 (10q23.2)    | 2.96E–08 | –         | –        | –        | –     | –        | –        | –        |
| 56 | rs7917772  | 10    | 102727686 | intron          | SFXN2   | Sideroflexin 2 (10q24.32)                                       | –        | –         | 1.45E–09 | –        | –     | –        | –        | –        |
| 57 | rs1004467  | 10    | 102834750 | intron          | CYP17A1 | Cytochrome P450 Family 17 Subfamily A Member 1 (10q24.32)       | 1.18E–07 | –         | –        | –        | –     | –        | –        | –        |

(Continued on next page)

**Table 4. Continued**

| No | SNV        | Chrom | Position  | Role            | Gene    | Full Gene Name (Cytogenetic Position)                        | BMI p    | OBESITY p | WHR p    | GLUC p   | INS p    | HOMA-B p | HOMAIR p | HbA1c p  |
|----|------------|-------|-----------|-----------------|---------|--------------------------------------------------------------|----------|-----------|----------|----------|----------|----------|----------|----------|
| 58 | rs3740390  | 10    | 102878723 | intron          | AS3MT   | Arsenite Methyltransferase (10q24.32)                        | 4.82E-08 | -         | -        | -        | -        | -        | -        | -        |
| 59 | rs4758633  | 11    | 219538    | intron          | SIRT3   | Sirtuin 3 (11p15.5)                                          | -        | -         | -        | -        | -        | -        | -        | 3.44E-10 |
| 60 | rs757110   | 11    | 17396930  | missense        | ABCC8   | ATP Binding Cassette Subfamily C Member 8 (11p15.1)          | 4.23E-07 | -         | -        | -        | -        | -        | -        | -        |
| 61 | rs10767664 | 11    | 27704439  | intron          | BDNF    | Brain Derived Neurotrophic Factor (11p14.1)                  | 5.53E-13 | -         | -        | -        | -        | -        | -        | -        |
| 62 | rs11038913 | 11    | 46538180  | intron          | AMBRA1  | Autophagy and beclin 1 regulator 1 (11p11.2)                 | -        | -         | -        | 4.29E-08 | 4.91E-18 | -        | -        | -        |
| 63 | rs11039149 | 11    | 47255124  | intron          | NR1H3   | Nuclear Receptor Subfamily 1 Group H Member 3 (11p11.2)      | -        | -         | -        | 1.26E-12 | 4.13E-45 | -        | -        | -        |
| 64 | rs7118178  | 11    | 47637583  | intron          | MTCH2   | Mitochondrial carrier 2 (11p11.2)                            | 5.12E-08 | -         | -        | 3.84E-14 | 2.16E-29 | -        | -        | -        |
| 65 | rs4246215  | 11    | 61796827  | utr-3-prime     | FEN1    | Flap Structure-Specific Endonuclease 1 (11p12.2)             | -        | -         | -        | 4.46E-11 | -        | -        | -        | -        |
| 66 | rs174556   | 11    | 61813163  | intron          | FADS1   | Fatty acid desaturase 1 (11q12.2)                            | -        | -         | -        | 7.82E-18 | -        | -        | -        | -        |
| 67 | rs7943191  | 11    | 62561079  | intron          | EEF1G   | Eukaryotic translation elongation factor 1 gamma (11q12.3)   | -        | -         | 4.36E-08 | -        | -        | -        | -        | -        |
| 68 | rs11231150 | 11    | 62584330  | intron          | TUT1    | Terminal uridylyl transferase 1, U6 snRNA-specific (11q12.3) | -        | -         | 5.20E-08 | -        | -        | -        | -        | -        |
| 69 | rs1017639  | 11    | 68831066  | intron          | CPT1A   | Carnitine Palmitoyltransferase 1A (11q13.3)                  | 4.96E-10 | -         | -        | -        | -        | -        | -        | -        |
| 70 | rs1296252  | 11    | 83273268  | intron          | CCDC90B | Coiled-Coil Domain Containing 90B (11q13.3)                  | 7.60E-08 | -         | -        | -        | -        | -        | -        | -        |
| 71 | rs2110073  | 12    | 6966719   | intron          | PHB2    | Prohibitin 2 (12p13.31)                                      | -        | -         | -        | -        | -        | -        | -        | 4.44E-08 |
| 72 | rs7311050  | 12    | 7013532   | intron          | LPCAT3  | Lysophosphatidylcholine Acyltransferase 3 (12p13.31)         | -        | -         | -        | -        | -        | -        | -        | 8.60E-08 |
| 73 | rs1049380  | 12    | 26336611  | downstream-500B | ITPR2   | Inositol 1,4,5-Trisphosphate Receptor Type 2 (12p11.23)      | -        | -         | 1.42E-13 | -        | -        | -        | -        | -        |
| 74 | rs2408955  | 12    | 48105348  | upstream-2KB    | PFKM    | Phosphofructokinase, muscle (12q13.11)                       | -        | -         | -        | -        | -        | -        | -        | 1.42E-15 |
| 75 | rs35767    | 12    | 102481791 | missense        | IGF1    | Insulin Like Growth Factor 1 (12q23.2)                       | -        | -         | -        | -        | 7.27E-08 | -        | 7.57E-08 | -        |
| 76 | rs4766578  | 12    | 111466567 | intron          | ATXN2   | Ataxin 2 (12q24.12)                                          | 2.85E-07 | -         | -        | -        | -        | -        | -        | 1.84E-07 |
| 77 | rs9581856  | 13    | 27451478  | upstream-2KB    | MTIF3   | Mitochondrial Translational Initiation Factor 3 (13q12.2)    | 1.03E-08 | -         | -        | -        | -        | -        | -        | -        |

(Continued on next page)

**Table 4. Continued**

| No | SNV        | Chrom | Position  | Role            | Gene         | Full Gene Name (Cytogenetic Position)                                                        | BMI p    | OBESITY p | WHR p    | GLUC p   | INS p | HOMA-B p | HOMA1R p | HbA1c p  |
|----|------------|-------|-----------|-----------------|--------------|----------------------------------------------------------------------------------------------|----------|-----------|----------|----------|-------|----------|----------|----------|
| 78 | rs1124607  | 13    | 27921083  | intron          | PDX1         | Pancreatic And Duodenal Homeobox 1 (13q12.2)                                                 | –        | –         | –        | 4.49E–07 | –     | –        | –        | –        |
| 79 | rs1325363  | 13    | 33192439  | intron          | STARD13      | StAR related lipid transfer domain containing 13 (13q13.1-q13.2)                             | 7.25E–08 | –         | –        | –        | –     | –        | –        | –        |
| 80 | rs1078892  | 13    | 40563883  | intron          | FOXO1        | Forkhead Box O1 (13q14.11)                                                                   | 5.11E–08 | –         | –        | –        | –     | –        | –        | –        |
| 81 | rs7143963  | 14    | 102838088 | intron          | TRAF3        | TNF Receptor Associated Factor 3                                                             | 2.82E–07 | –         | –        | –        | –     | –        | –        | –        |
| 82 | rs12908437 | 15    | 98744146  | intron          | IGF1R        | Insulin Like Growth Factor 1 Receptor                                                        | –        | –         | –        | 6.32E–07 | –     | –        | –        | –        |
| 83 | rs740862   | 16    | 3639677   | intron          | DNASE1       | Deoxyribonuclease 1                                                                          | 3.21E–07 | –         | –        | –        | –     | –        | –        | –        |
| 84 | rs151181   | 16    | 28479196  | intron          | CLN3         | CLN3, Battenin                                                                               | 2.10E–07 | –         | –        | –        | –     | –        | –        | –        |
| 85 | rs8055138  | 16    | 28880144  | intron          | ATP2A1       | ATPase Sarcoplasmic/Endoplasmic Reticulum Ca <sup>2+</sup> Transporting 1                    | 8.17E–17 | –         | –        | –        | –     | –        | –        | –        |
| 86 | rs749767   | 16    | 31113086  | downstream-500B | BCKDK        | Branched Chain Ketoacid Dehydrogenase Kinase                                                 | 1.21E–09 | –         | –        | –        | –     | –        | –        | –        |
| 87 | rs7186084  | 16    | 68782357  | intron          | CDH1         | Cadherin 1                                                                                   | –        | –         | –        | –        | –     | –        | –        | 1.09E–07 |
| 88 | rs1847591  | 16    | 78908913  | intron          | WWOX         | WW domain containing oxidoreductase                                                          | –        | –         | 9.99E–07 | –        | –     | –        | –        | –        |
| 89 | rs9904685  | 17    | 1352101   | intron          | YWHAE        | Tyrosine 3-monooxygenase/tryptophan 5-monooxygenase activation protein epsilon               | 6.27E–07 | –         | –        | –        | –     | –        | –        | –        |
| 90 | rs4646404  | 17    | 17516885  | intron          | PEMT         | Phosphatidylethanolamine N-Methyltransferase                                                 | –        | –         | 5.30E–11 | –        | –     | –        | –        | –        |
| 91 | rs9914988  | 17    | 28856086  | intron          | ERAL1        | Era like 12S mitochondrial rRNA chaperone 1                                                  | –        | –         | –        | –        | –     | –        | –        | 2.77E–11 |
| 92 | rs242559   | 17    | 45948522  | intron          | MAPT         | Microtubule Associated Protein Tau                                                           | –        | –         | –        | 8.29E–07 | –     | –        | –        | –        |
| 93 | rs1319247  | 17    | 63106279  | intron          | TANC2        | Etratricopeptide repeat, ankyrin repeat and coiled-coil containing 2                         | –        | –         | 6.02E–08 | –        | –     | –        | –        | –        |
| 94 | rs12940622 | 17    | 80641771  | intron          | RPTOR        | Regulatory Associated Protein Of MTOR Complex 1                                              | 2.49E–09 | –         | –        | –        | –     | –        | –        | –        |
| 95 | rs1044661  | 17    | 82943144  | intron          | B3GNTL1/TBCD | UDP-GlcNAc:BetaGal Beta-1,3-N-Acetylglucosaminyltransferase Like 1/Tubulin Folding CofactorD | –        | –         | –        | –        | –     | –        | –        | 1.74E–46 |
| 96 | rs1788785  | 18    | 23562376  | intron          | NPC1         | NPC Intracellular Cholesterol Transporter 1                                                  | 1.98E–08 | –         | –        | –        | –     | –        | –        | –        |

(Continued on next page)

**Table 4. Continued**

| No  | SNV        | Chrom | Position  | Role          | Gene   | Full Gene Name (Cytogenetic Position)                      | BMI p    | OBESITY p | WHR p           | GLUC p | INS p           | HOMA-B p | HOMAIR p | HbA1c p   |
|-----|------------|-------|-----------|---------------|--------|------------------------------------------------------------|----------|-----------|-----------------|--------|-----------------|----------|----------|-----------|
| 97  | rs17066842 | 18    | 60373391  | upstream-2KB  | MC4R   | Melanocortin 4 Receptor                                    | 6.40E-14 | -         | -               | -      | -               | -        | -        | -         |
| 98  | rs12454712 | 18    | 63178651  | intron        | BCL2   | BCL2, Apoptosis Regulator                                  | -        | -         | <i>1.10E-09</i> | -      | <i>1.39E-07</i> | -        | -        | -         |
| 99  | rs757318   | 19    | 18709498  | intron        | CRTC1  | CREB Regulated Transcription Coactivator 1                 | 8.76E-09 | -         | -               | -      | -               | -        | -        | -         |
| 100 | rs2075650  | 19    | 44892362  | intron        | TOMM40 | Translocase Of Outer Mitochondrial Membrane 40             | 1.25E-08 | -         | -               | -      | -               | -        | -        | -         |
| 101 | rs405509   | 19    | 44905579  | upstream-2 kb | APOE   | Apolipoprotein E                                           | 2.65E-07 | -         | -               | -      | -               | -        | -        | -         |
| 102 | rs2281361  | 20    | 32140338  | intron        | TM9SF4 | ransmembrane 9 superfamily member 4                        | 9.78E-07 | -         | -               | -      | -               | -        | -        | -         |
| 103 | rs878639   | 20    | 35306660  | intron        | UQCC1  | Ubiquinol-Cytochrome C Reductase Complex Assembly Factor 1 | -        | -         | 1.50E-11        | -      | -               | -        | -        | -         |
| 104 | rs2076574  | 20    | 41092733  | intron        | TOP1   | DNA topoisomerase I                                        | -        | -         | 4.11E-07        | -      | -               | -        | -        | -         |
| 105 | rs5750373  | 22    | 37028990  | intron        | MPST   | Mercaptopyruvate Sulfurtransferase                         | -        | -         | -               | -      | -               | -        | -        | 2.17E-07  |
| 106 | rs2284099  | 22    | 43155830  | intron        | TSPO   | Translocator Protein                                       | -        | -         | 6.65E-07        | -      | -               | -        | -        | -         |
| 107 | rs1050828  | 23    | 154536002 | missense      | G6PD   | Glucose-6-phosphate dehydrogenase                          | -        | -         | -               | -      | -               | -        | -        | 8.23E-135 |
| 108 | rs1448032  | 23    | 155052530 | intron        | FUNDC2 | FUN14 domain containing 2                                  | -        | -         | -               | -      | -               | -        | -        | 5.92E-17  |
| 109 | rs5940514  | 23    | 155559972 | intron        | TMLHE  | Trimethyllysine hydroxylase, epsilon                       | -        | -         | -               | -      | -               | -        | -        | 2.22E-19  |

p values in italics annotate SNVs that associate as significant with more than one trait.

PMID: 20935630 (Spelotes et al., 2010), PMID: 22982992 (Yang et al., 2012), PMID: 23754948 (Randall et al., 2013), PMID: 23563607 (Berndt et al., 2013), PMID: 25673412 (Shungin et al., 2015), PMID: 25673413 (Locke et al., 2015), PMID: 23583978 (Monda et al., 2013), PMID: 28430825 (NG et al., 2017), PMID: 28443625 (Justice et al., 2017)

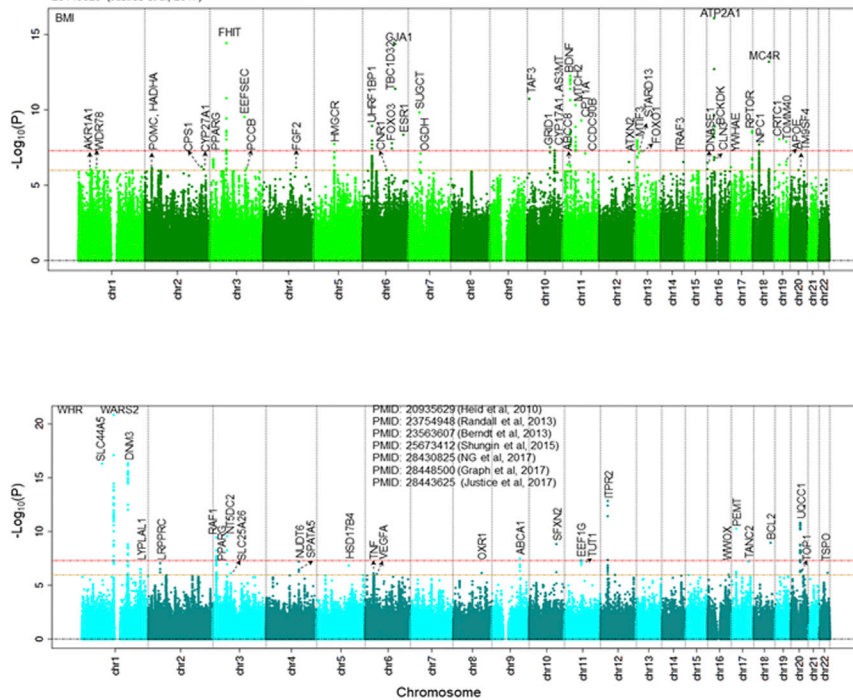

**Figure 2. BMI and WHR Association Results with MT-nDNA Candidate Genes**

to 29 genes targeting regulation of 50 genes, distributed among 13 tissues (adipose, tibial artery, thyroid, skin, blood, brain, skeletal muscle, esophageal muscularis, fibroblast, liver, pancreas, testis, and tibial nerve). There were 28 unique lead and 18 unique secondary ( $LD r^2$  was  $< 0.02$  to the target gene's best eSNV) eSNVs identified (see [Material and Methods](#)). For example, rs2510344 of *NPC1* regulates *C18orf8* in skin and rs11663558 of *NPC1* regulates its own *NPC1* gene expressed highest in subcutaneous adipose tissue (GTEx data).

**trans-eQTLs of MT-nDNA Candidate Variants**

We combined the GWAS p value for the MT-nDNA SNVs with additional evidence from *trans*-gene expression regulation for a specific variant using GWAS3D<sup>83</sup> (Figures S12.1–S12.3). The GWAS3D software selected 16 cell types, which included chromosomal looping data (5C or ChIA-PET or Hi-C) and important transcriptional marker data (H3K4me1, H3K27ac, DHSs, EP300, and CTCF).<sup>83</sup> Among several *trans*-eQTLs, for example, rs2881156 ( $p = 8.1E-07$ ) of *SLC25A48* (5q31.1 [MIM: 616150], Figure S12.1) associated with obesity and *trans*-regulated expression of three genes: *SAR1B* (5q31.1 [MIM: 607690]) involved in protein transport from the endoplasmic reticulum to the Golgi (mutations in this gene are a cause of chylomicron retention disease [MIM: 246700]);<sup>84</sup> *TRPC7* (5q31.1), a regulator of intracellular calcium levels;<sup>85</sup> and *REEP2* (5q31.2 [MIM: 609347]), which enhances the function of sweet taste receptors<sup>86</sup> and is about 80 times higher expressed in brain than in other tissues (GTEx data).

**PPI Network**

We analyzed 109 MT-nDNA proteins using the PPI network (see [Web Resources](#))<sup>87,88</sup> to identify 4,132 interacting proteins. We present the 15 top genes (Table S11) with highest PageRank score for PPI,<sup>89–91</sup> including the number of PPI, a short description of gene's function from Gene Entrez of NCBI-db, associated trait(s), and association p value(s) (see also [Supplemental Material and Methods](#), section 9). From the PPI analysis it is evident that a gene/protein hub (which is assumed important because of a relatively large number of interactions) is not necessary, the top-notch for association with a specific trait, as shown in the [Discussion](#) section.

findings demonstrate the importance of several MT-nDNA candidates to cardiometabolic outcomes.

**eQTLs of MT-nDNA Candidate Variants**

Several variants in or near MT-nDNA candidate genes were identified as expression QTL (eSNV) (Table S8). Based on RegulomeDB,<sup>78</sup> three variants were the best in eSNVs features' ranking. The first was rs242559, intronic to *MAPT* (MIM: 157140). Mutations in *MAPT* associate with lower mitochondrial nicotinamide adenine dinucleotide (NADH) levels,<sup>79</sup> partially suppress complex I-driven respiration, and lower overall ATP production by oxidative phosphorylation, with cells relying on glycolysis to maintain ATP levels. The second, rs9897919, is a 3' UTR variant for *TBCD* (MIM: 604649), tubulin folding cofactor D, and *B3GNTL1* (17q25.3 [MIM: 615337]), a putative glycosyl-transferase. The third, rs1788821, is intronic to *NPC1* (MIM: 607623), which is an intracellular cholesterol transporter with a role in the egress of cholesterol from the endosomal/lysosomal compartments (Table S9).

The findings of RegulomeDB were reinforced by HaploReg (v.4.1).<sup>80</sup> The MT-nDNA variants showed an enrichment in transcription regulation features. For instance, rs242559 of *MAPT* is localized within the promoter histone marks in skeletal muscle, at enhancer histone marks of 16 tissues, and at DNase marks of 4 tissues. In addition, the rs242559 polymorphism alters the protein binding site of GATA2, a transcription factor protein that binds in the promoter regions of target genes (Table S9).

To determine the eSNVs' gene targets in specific tissues, we used GTEx (v.7.0)<sup>81,82</sup> with a summary in Table S8 and detailed in Table S10. The 42 unique eSNVs were assigned

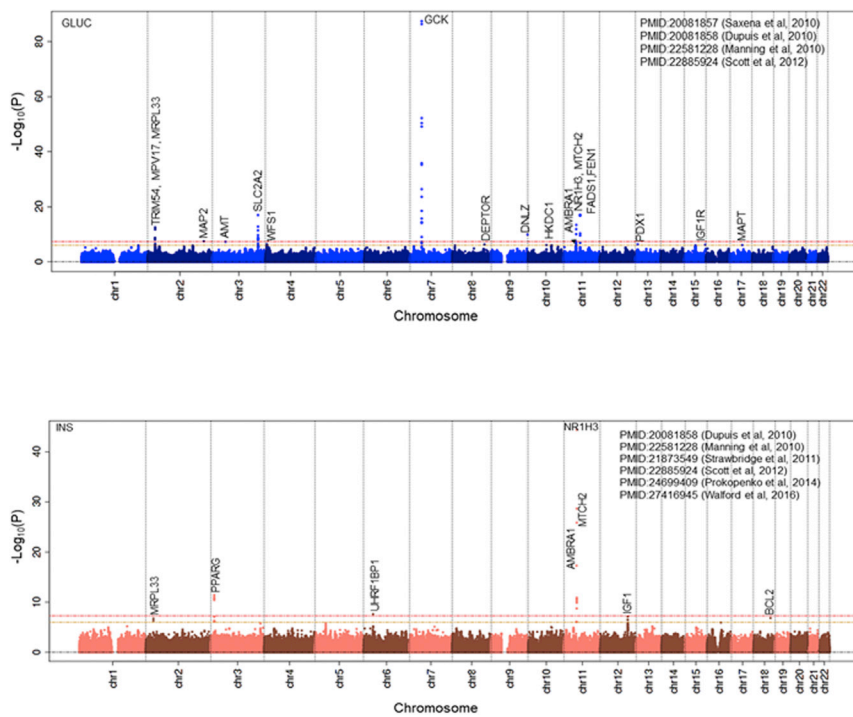

**Figure 3. Glucose and Insulin Association Results with MT-nDNA Candidate Genes**

and X chromosome epigenetic gene expression regulation. The PPI network analysis identified top PageRank-ed interacting genes from our significant MT-nDNA associations, but they did not necessarily represent the highest trait-specific associations. Overall, these findings indicate the important role of both the nuclear genome and mtDNA-related variants in energy production and, in turn, in the polygenic architecture of metabolic traits. Below we summarize and discuss our most salient study findings.

### mtDNA and Metabolic Disease Associations

To date, nearly 290 genetic causes for rare disorders of mitochondrial energy generation have been identified.<sup>92</sup> These rare mitochondrial genetic diseases commonly result in multiple clinical phenotypes with varying penetrance, likely due to differences in heteroplasmy.<sup>93</sup> In our study, *MT-ATP6* variants MT-8706 and MT-8896 (rs202120082), one with MAF > 1% and the other one rare, respectively, were both associated with WHR. *MT-ATP6* is part of the proton-transporting portion of ATP synthase, contributing to its rotational mechanism.<sup>94,95</sup> rs202120082 (MT-8896) is a missense mutation (p.Ala124Thr) and conversion of the hydrophobic alanine to an uncharged, polar threonine at this site may have implications for ATP6's ability to effectively pump protons and thus decrease production of ATP energy units.

MT-16320 (rs62581338; MAF > 1%), in the *D-loop*, which contains a few mtDNA replication origins and is possibly involved in accelerating mtDNA synthesis to satisfy developmental, physiological, or aging-related demands,<sup>96</sup> displayed a significant association with glucose. MT-16320 is less than 1 kb from a major mtDNA transcription initiation site (IT) that overlaps with promoters (in the D-loop in H-strand, IT<sub>H1</sub> at 561 bps and IT<sub>H2</sub> at 630, and in L-strand at 407 bps (IT<sub>L1</sub>))<sup>97</sup> and is 500 bps downstream of mitochondrial-encoded cytochrome b (*MT-CYB* [MIM: 516020], plus strand) and 2 kb upstream of *MT-ND6* (minus strand).

Of the five rare SNVs, MT-14272 (rs2853814, missense), MT-14353, and MT-14584 of *MT-ND6* were associated with adiposity-related traits. *MT-ND6* is a core subunit of the mitochondrial membrane respiratory chain NADH dehydrogenase (complex I) and is part of the minimal assembly required for catalysis. Complex I functions in the transfer of electrons from NADH into the respiratory chain, while

### Discussion

This large, comprehensive study of human mitochondrial and nuclear mitochondrial genetic variation in relation to seven key risk factors for metabolic disease provides important information toward a better understanding of the causes and mechanisms of these phenotypes. The use of a two-tiered approach—i.e., examining mtDNA variants for up to ~170,202 individuals and nuclear MT-nDNA candidate gene polymorphisms for up to ~339,000 individuals—facilitated the evaluation of the genetic underpinnings of seven metabolic traits reflecting adiposity/obesity and glucose-insulin metabolism and signaling. We identified two mtDNA SNVs (in *MT-ATP6* and the *D-loop*) associated with WHR and fasting glucose, a burden of SNVs in a gene (*MT-ND3*) associated with BMI, and five rare SNVs of mtDNA (in *MT-ATP6*, *MT-ND5*, and *MT-ND6*) associated with BMI (2 of 3), with WHR (2 of 3), and with fasting insulin (1 of 3). Additionally, the MT-nDNA meta-analysis implicated significant associations with 62 of 109 protein coding candidate genes ( $p \leq 5E-08$ ), 29 additional passing the above threshold for the metabolic traits considered herein or any other traits querying the GWAS catalog (see [Web Resources](#)). Only 16% of MT-nDNA findings passed  $p \leq 1E-06$  but did not reach  $p \leq 5E-08$ , and thus may be considered as new MT-nDNA contributions in association with seven metabolic traits ([Tables 4](#) and [S12](#)). Enrichment analysis showed that 13 of MT-nDNA genes have also been identified as candidate genes for T2D risk and 18 for CVD risk. The eQTL analysis of MT-nDNA candidates revealed that approximately 27% of associations with seven metabolic traits also act as eSNVs in regulating expression of other *cis*-genes. In addition, *trans*-eQTL analysis yielded potential support for maternal



coupling the flow of electrons to the pumping of protons. We also demonstrated an association between insulin and rare variant MT-14124 in the closely related *MT-ND5* gene. *MT-ND5* is also a core subunit of the mitochondrial membrane respiratory chain NADH dehydrogenase (complex I). Future studies need to validate these rare variant mtDNA findings.

It is also important to note that we observed several rare gene-based suggestive associations between our metabolic traits ( $p \leq 5E-02$ , [Tables 2 and 3](#)) and non-protein coding genes, primarily tRNAs. Mutations within tRNAs that impact translation would impact all of the mtDNA-encoded peptides and consequently would be expected to have significant effects on oxidative phosphorylation. The *MT-ND3* gene displayed an aggregate of low-frequency variants associated with BMI. *MT-ND3* is a subunit of the respiratory chain complex I that is part of the minimal assembly of core proteins required to catalyze NADH dehydrogenation and electron transfer to ubiquinone (co-enzyme Q10). Interestingly, previous studies have demonstrated increased *MT-ND3* gene expression associated with a higher histological severity of hepatic steatosis.<sup>98</sup> Gene-based meta-analysis burden test, which employed inverse variance weighting to combine association results from 82 variants in *MT-ND3* gene across cohorts, yielded a significant association between *MT-ND3* and BMI ( $p = 1E-03$ , [Figure S17](#)). This figure illustrates that rare alleles of 82 SNVs contributing in the *MT-ND3* meta-analysis have variable effects.

We used GTEx data for mtDNA genes as assembled by the Human Protein Atlas team (see [Web Resources](#)). They showed the highest expression of RNA for the *MT-ATP6*, *MT-ND3*, *MT-ND5*, and *MT-ND6* significant mtDNA genes in the heart and brain, which represent the highest energy-demanding tissues as compared, for example, to adipose tissue, in a ratio of about 3:1 ([Figure S13](#)). The importance of MT-nDNA and mtDNA gene polymorphisms in the heart is supported by recent publications that have summarized the relation of MT to vascular function,<sup>99</sup> as therapeutic targets in heart failure,<sup>100</sup> and specific genes and pathways that relate to the heart.<sup>101,102</sup>

### MT-nDNA Candidate Genes Associations (Glycemic Traits)

Glucose sensing in  $\beta$  cells is largely controlled by the hexokinase proteins. Three of the genes encoding hexokinases, *HK1* (MIM: 142600), *HKDC1* (MIM: 617221), and *GCK*, were part of our MT-nDNA candidate list and were found to be significantly associated with glucose, HOMA-B, and/or HbA1c ([Table 4](#)). Hexokinases catalyze the conversion of glucose into glucose-6-phosphate. The phosphorylation of glucose directly couples extra-mitochondrial glycolysis to intra-mitochondrial oxidative phosphorylation. *GCK*, for example, with pleiotropic effects, produces an enzyme in the pancreas which plays a role in glucose-stimulated insulin secretion and affects glucose uptake and conversion to glycogen in the liver. The *GCK*

GWAS-identified variant rs2908289 ([Table 4](#)) has been previously associated with glucose, HOMA-B, HbA1c,<sup>54,60</sup> and other variants in LD with it, more recently associated with BMI (rs4607517,  $r^2 = 0.65$ ,  $p = 8E-56$ ),<sup>55</sup> with T2D (rs1799884,  $r^2 = 0.81$ ,  $p = 5E-18$ ),<sup>103</sup> and with metabolic syndrome (rs3757840,  $r^2 = 0.18$ ,  $p = 4E-13$ ).<sup>104</sup> Mitochondrial metabolism, which drives the respiratory chain to produce ATP via oxidative phosphorylation, also contributes to glucose sensing, since disruption of mitochondrial oxidative metabolism blocks glucose-stimulated insulin secretion.<sup>40,105-107</sup> Our analysis shows that 13 additional MT-nDNA candidate genes are annotated with SNVs that associate with glucose/insulin metabolism ([Figure S11](#)). Diabetes mellitus has been associated with maternally inherited mutations in *MT-TK* (MIM: 590060), *MT-TS2* (MIM: 590085), and *MT-TE* (MIM: 590025), where the molecular mechanisms involve impaired translation of mtDNA-encoded proteins.<sup>3</sup> In addition, MT-nDNA candidate genes *POLG* (15q26.1 [MIM: 174763], DNA polymerase gamma); *RRM2B* (8q22.3 [MIM: 604712], a ribonucleotide reductase); *OPA1* (3q29 [MIM: 605290], a nuclear-encoded mitochondrial protein with similarity to dynamin-related GTPases); and *MPV17* (2p23.3 [MIM: 137960], a mitochondrial inner membrane protein) have been associated with diabetes mellitus, largely due to an impairment in mtDNA maintenance.<sup>108</sup> In our study, rs1050828, a missense mutation of *G6PD* (Xq28 [MIM: 305900], 154536002 bps;  $p = 8.2E-135$ ) was associated with HbA1c. *G6PD* catalyzes the rate-limiting step of oxidative pentose-phosphate pathways, a route for dissimilation of carbohydrates besides glycolysis. It contributes to the production of NADPH and pentose phosphatases for fatty acid and nucleic acid synthesis ([Table S6](#) and [Figure S14](#)). *G6PD* plays an essential role in maintaining health by protecting against oxidative damage.<sup>109,110</sup> The same rs1050828 variant of *G6PD* has previously been reported as associated with HbA1c lowering in African Americans but not in other populations, leading to misdiagnosis/under-diagnosis of T2D.<sup>61</sup> In the last century, a number of papers reported a maternal excess transmission of T2D,<sup>111-113</sup> suggesting the possibility of an epigenetic transmission of diabetes mediated by the mother. To date, two genes, *KLF14* (7q32.2 [MIM: 609393])<sup>114</sup> and *KCNQ1* (11p15.5-p15.4 [MIM: 607542]),<sup>115,116</sup> have been described as potential candidates that show parent-of-origin effects in association with T2D. However, based on our MT-nDNA list, these two genes are not MT-nDNA candidates. In our study, GWAS3D analysis identified *G6PD* as *trans*-regulated with the expression of *MECP2* (Xq28 [MIM: 300005]) ([Figure S12.3](#)).<sup>117</sup> *MECP2* binds to methylated DNA and mediates transcriptional repression through interaction with histone deacetylase and the corepressor *SIN3A* (15q24.2 [MIM: 607776]) ([Figure S14](#)). Lai et al.<sup>118</sup> reported meta-results that T2D-affected case subjects with *G6PD* deficiency had two times higher odds of developing diabetes than unaffected control subjects.<sup>119</sup> Furthermore,

G6PD protein has a weak score of 1 out of 5 to be found in MT. G6PD is mainly localized in the cytosol and also to the microtubule-organizing center and vesicles (Human Protein Atlas). G6PD protein has 69 interactions and was ranked 65th by the PageRank algorithm for the importance of PPI. These results taken together may suggest that *G6PD* contributes to the maternal epigenetics of T2D, through X chromosome inheritance and less through MT. Other candidates of MT-nDNA genes that may contribute to mitochondrial epigenetics<sup>120</sup> are *DNMT1* (19p13.2 [MIM: 126375], DNA methyltransferase 1), *POLRMT* (19p13.3 [MIM: 601778], RNA polymerase mitochondrial), *TFB1M* (6q25.3 [MIM: 607033], transcription factor B1, mitochondrial), *TFB2M* (1q44 [MIM: 607055], transcription factor B2, mitochondrial), and *TFAM* (10q21.1 [MIM: 600438], transcription factor A, mitochondrial), but showed no significant associations with existing data for the traits studied (for BMI: rs6926853, *TFB1M*,  $p = 1.3E-03$ ;<sup>45</sup> WHR: rs10465617, *TFB2M*,  $p = 3.1E-03$ ;<sup>43</sup> glucose: rs4804124, *DNMT1*,  $p = 7.3E-05$ ;<sup>54</sup> insulin: rs7253062, *DNMT1*,  $p = 4.4E-03$ ;<sup>55</sup> HOMA-B: rs12462004, *DNMT1*,  $p = 4.4E-03$ ;<sup>54</sup> HOMA-IR: rs892189, *DNMT1*,  $p = 7E-04$ ;<sup>54</sup> HbA1c: rs11006132, *TFAM*,  $p = 2.4E-03$ <sup>61</sup>).

#### MT-nDNA Candidate Genes Associations (Adipose Traits)

We found that a total of 26 of the 109 MT-nDNA candidate genes showed significant associations with WHR (Tables 4 and S6 and Figure S11). For example, *WARS2* (1p12 [MIM: 604733]) encodes the MT tryptophanyl-tRNA synthase. We observed an intronic rs6428792 of *WARS2* in association with WHR ( $p = 7.95E-18$ ).<sup>50</sup> Another SNV, rs10923724 in LD with rs6428792,  $r^2 = 0.29$ , WHR  $p = 9E-25$ <sup>52</sup> upstream of *WARS2* but closer to downstream of *TBX15* (1p12 [MIM: 604127]), modifies *WARS2* expression in skeletal muscle ( $p = 1.1E-36$ ) and in adipose-subcutaneous tissues ( $p = 1E-29$ ) (GTEx data). In our PPI analysis of 109 MT-nDNA genes and 4,132 interactants, *WARS2* showed two interactions and was ranked 2,028th based on the PageRank algorithm. Taken together, these findings (our study, GTEx, and GWAS) suggest that associations with WHR might be mediated also by differential expression of *WARS2*.<sup>121</sup>

There were 48 MT-nDNA candidates associating with BMI. For example, *NPC1* (18q11.2, Tables 4 and S6) has been associated with early childhood onset and adult morbid obesity.<sup>122</sup> *NPC1* (a cholesterol transporter) is highly expressed in human white adipose tissue adipocytes with increased levels in obese individuals.<sup>123</sup> Our lead SNV rs1788785 is an eSNV for *NPC1* and is not in LD with the best *NPC1* eSNV, supporting *NPC1* as a candidate gene for obesity. Indeed, studies in mice have shown that a non-functioning *NPC1* resulted in late-onset weight loss and less food intake.<sup>124</sup> In humans, *NPC1* is part of the cholesterol metabolism pathway (see Web Resources). Recently, *NPC1* mutant cells were reported to have fragmented mitochondrial networks, increased respira-

tion, alterations in the composition of the respiratory chain complex, and a substantial reduction in the cellular ATP level. Thus, a primary lysosomal defect in *NPC1* mutant fibroblasts is accompanied by deregulation of the organization and function of the mitochondrial network.<sup>125</sup> *NPC1* was ranked 241st and had 13 interactions in the PPI network.

Other notable obesity-related variants/genes among MT-nDNA candidates include *POMC* (2p23.3, adrenocorticotrophic peptide/hormone,  $p = 7.2E-07$ ), which binds to melanocortin 2 receptor (*MC2R*, 18p11.21 [MIM: 607397]), stimulating release of cortisol, a steroid stress-response hormone. *MC4R* (18q21.32,  $p = 6.4E-14$ ) was ranked the 3rd in BMI-effects compared to *FTO* (16q12.2 [MIM: 610966]), the top ranked for BMI effects in Speliotes et al.,<sup>41</sup> Locke et al.,<sup>46</sup> and Winkler et al.<sup>48</sup> *MC4R* is another member of the melanocortin receptor family, which has a central role in energy homeostasis and somatic growth. *MC4R* is ranked the 82nd, with 12 PPI, when analyzed for the importance of PPI using the PageRank algorithm. *CNR1* (6q15 [MIM: 114610], cannabinoid receptor,  $p = 9.6E-07$ ) influences mitochondrial respiration. *CRTC1* (19p13.11 [MIM: 607536], CREB regulated transcription coactivator 1,  $p = 8.8E-09$ ) is a potent coactivator of *PGC1a* (4p15.2, officially known as *PPARGC1A* [MIM: 604517]), a transcriptional coactivator that regulates the genes involved in energy metabolism, and inducer of mitochondrial biogenesis.

*MTCH2* (11p11.2, mitochondrial carrier homolog 2, rs7118178, BMI  $p = 5.1E-08$ ) was 9th in BMI effects compared to *FTO* in Speliotes et al.<sup>41</sup> and 16th in Locke et al.<sup>46</sup> *MTCH2* is located in the inner membrane of MT, highly expressed in white adipose tissue and adipocytes, and is thought to play a regulatory role in adipocyte differentiation and biology.<sup>126</sup> The *MTCH2* GWAS-variant rs7118178 (Table 4) has been associated with BMI,<sup>46</sup> glucose,<sup>36,55</sup> and pro-insulin<sup>58</sup> (Figure 4, T1-4). *MTCH2* has 87 protein interactions and ranked 14th when analyzed for the importance of PPI using PageRank algorithm. *MTCH2* deficiency in mouse muscle has been shown to be beneficial, protecting mice from the obesogenic effect of high-fat diets, most likely the result of an increase in mitochondrial metabolism. *MTCH2* is proposed as a repressor of muscle mitochondrial metabolism and size.<sup>127</sup> Using both GWAS and eQTL information, three *MTCH2* SNVs co-localize within a 15 kbp DNA region. Based on GTEx data, rs4752856 in *MTCH2* (Figure 4, T6) regulates gene expression of *C1QTNF4* (11p11.2 [MIM: 614911]) and *PSMC3* (11p11.2 [MIM: 186852]) in subcutaneous adipose tissue. rs3817335, which is in high LD ( $r^2 = 0.903$ ) with rs4752856, regulates *SLC39A13* (11p11.2 [MIM: 608735]) in tibial artery tissue, while rs7118178 (in less LD to two other SNVs,  $r^2 = 0.083$ ) regulates *CELFI* (11p11.2 [MIM: 601074]) in tibial nerve tissue, and with results similar to the best eSNVs for the mentioned genes and in high LD with their eSNVs (Figure 4, T5). *C1QTNF4* is reported as a potential cytokine

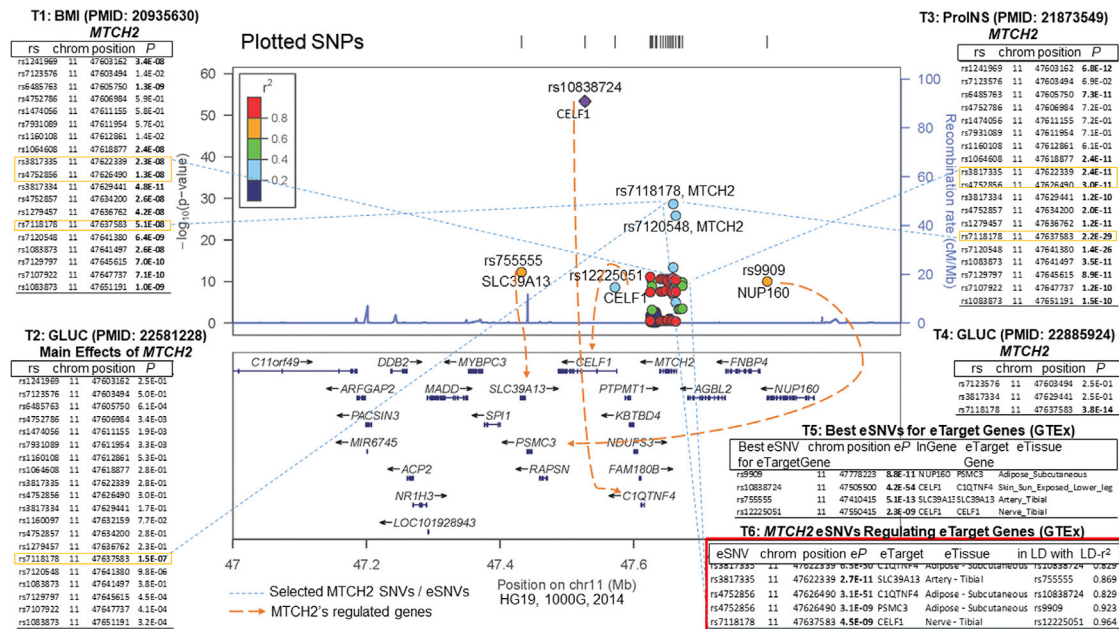

**Figure 4. Selected SNVs of *MTCH2* Significantly Associating with BMI, Glucose, Insulin, and a Few of Them Regulating the Expression (eSNVs) of at Least Four Genes: *CIQTNF4*, *SLC39A13*, *PSMC3*, and *CELF1***

First, we used LocusZoom<sup>142</sup> for plotting regional information for *MTCH2* selected SNVs, which have been reported by large GWAS publications (for BMI<sup>41</sup> [T1], for glucose<sup>55</sup> [T2], for proinsulin<sup>58</sup> [T3], and another large analysis for glucose<sup>56</sup> [T4]), for strength and extent of the association signal relative to genomic position, local linkage disequilibrium, and recombination patterns and the positions of genes in the region. Second, we used GTEx<sup>81</sup> data to identify the SNVs of *MTCH2* that are eSNVs by influencing the expression of other *cis*-target-genes (*CIQTNF4*, *PSMC3*, *SLC39A13*, *CELF1*) (T6). Third, we verified whether these eSNVs of *MTCH2* (connected with blue dashed lines) are true expression regulators, by identifying the best eSNVs of the four target genes (T5, regulation effects shown with orange-dashed lines) and evaluating the LD  $r^2$  between the *MTCH2* eSNV, e.g., rs4752856 (T6) and the best eSNV rs10838724 (T5) for the corresponding target gene (*CIQTNF4*), which was found to be 0.829 in adipose-subcutaneous tissue (T6). Fourth, the *MTCH2* SNVs serving as eSNVs for the four *cis*-target-genes, shown in T6, colocalize in about 15K bps region. Thus, *MTCH2* associates with BMI, glucose, and proinsulin, and among others influence the gene expression of other *cis*-genes (*CIQTNF4*, *PSMC3*, *SLC39A13*, *CELF1*), who in itself contribute also to individuals' obesity risk (see Discussion).

that can induce the activation of both *NFKB1* (MIM: 164011) and *IL6/STAT3* (MIM: 147620/102582) signaling pathways<sup>128</sup> and acts in the hypothalamus to modulate food intake and peripheral energy expenditure.<sup>129</sup> *PSMC3* is involved in ATP-dependent degradation of misfolded and damaged proteins and in removal of no longer required proteins. This protein is also involved in cell cycle progression, apoptosis, and DNA damage repair. A knock-down of *PSMC3* in human immortalized fibroblasts increased cell proliferation.<sup>130</sup> *CELF1* has been associated with Alzheimer disease and obesity.<sup>131</sup> Consequently, *MTCH2* SNVs regulate gene expression of other *cis*-genes related to obesity, food intake, and/or cell number. Thus, *MTCH2* effects on BMI may be more complex than previously accounted for.

### Other Functions of MT-nDNA Candidate Genes

Mitochondrial inheritance has been previously associated with obesity, metabolic syndrome, insulin resistance, type 2 diabetes, and cardiovascular disease.<sup>3,40,132–135</sup> The complex genetics of MT affects processes of glucose, lipid, and amino acid catabolism, with ATP as the final energy product. By-products of these processes play an important role in signaling (e.g., ROS) and are used for

epigenetic modifications (e.g., acetyl CoA). In our study, we would expect a preponderance of glycomycin and lipid genes and proteins. Out of 109 MT-nDNA candidate genes, 21 of the significantly associated genes were functionally related with cholesterol (Table S6 and Figure S11), 16 with glucose and insulin, and 5 with adipose/obesity. The 109 MT-nDNA candidate genes have other functions too. For example, rs1044661 is located at 17q25.3, overlapping two genes that run in opposite strands: *TBCD* (involved in tubulin folding as cofactor D) and *B3GNTL1* (a putative glucosyltransferase). This SNV was associated with HbA1c ( $p = 1.74E-46$ ).<sup>61</sup> Recently, Francis et al.<sup>136</sup> hypothesized that the interaction between *TBCD* (17q25.3) and *ARL2* (11q13.1 [MIM: 601175]) suggest that *ARL2* serves as regulator of both mitochondrial fusion and microtubule dynamics. In 109 MT-nDNA candidates, *WDR78* (1p31.3), *TRIM54* (2p23.3 [MIM: 606474], regulating titin kinase [controlling elasticity in muscle] and microtubule-dependent signaling pathways in striated muscles), *DNM3* (1q24.3 [MIM: 611445], involved in vesicular transport and with biased expression in brain), *MAP2* (2q34 [MIM: 157130], involved in microtubule assembly and neurogenesis), *GJA1* (6q22.31 [MIM: 121014], involved in the

contraction of heart) and *MAPT* (17q21.31, expressed in nervous system) produce microtubule-associated proteins in interaction with MT (Table S6 and Figure S11). It should be noted that rs1050828, a missense mutation of *G6PD* residing on X chromosome, may impact HbA1c through non-glycemic factors rather than glucose metabolism.<sup>61</sup> Additional functions of MT-nDNA candidate genes are described in the [Supplemental Material and Methods](#), section 7.

### Strengths and Limitations

Our study had many strengths. We used large sample sizes for studying mtDNA and MT-nDNA. At the mtDNA level we validated SNVs used per cohort and imputed based on Cosmopolitan MT-1000 Genomes. At the MT-nDNA level we used the strength of many consortia contributions for associations with seven traits. As a consequence, we performed comprehensive mtDNA and MT-nDNA analyses. The seven mtDNA variants significant associations showed no statistical significant deviations from the homogeneity/similarity of beta contributions before meta-pooling across studies as reported with Het-p in Table 1, as well as graphically represented in the Forest plot (Figure S16). For supporting MT-future studies, we have provided mtDNA updated Tables S15–S28 for arrays used in this study including MitoMap annotation. Also, we include Table S32 of predictions from the bioinformatics platforms that have been shown to have the highest sensitivity and specificity for the mtDNA variants.<sup>137</sup> Our study also had some limitations. Rare mtDNA mutations are usually heteroplasmic point mutations and/or mtDNA lesions that typically result in a primary mitochondrial disease, which can manifest as a broad range of clinical outcomes. In this study we have interrogated the effect of inherited mtDNA variants, much commoner in the population than typical mtDNA mutations. Therefore, while there is a great deal of literature linking inherited mtDNA variants to disease, many of these studies have limited statistical power<sup>138</sup> and several have never been independently replicated. So in many respects there is not a great deal of robust literature to call upon. The harmonization of mtDNA in each study was dependent on the number of mtDNA variants and their quality. Some variants were dropped before performing any imputation, because low-quality variants matched not only to the mtDNA genome, but also to nuclear genome (see mtDNA Variant Harmonization in [Material and Methods](#)). A number of quality-control filters were applied to mtDNA, which reduced individual sample size per marker or the number of useful markers. We did not address the association of significant markers by gender, because in our study sample sizes per mtDNA marker were variable and often small.

### Perspective and Conclusion

We focused on associations of MT with adipose and glycemic traits, yet we acknowledge that there is still much to be learned from other traits, for example for triglycer-

ides, high-density lipoprotein cholesterol, and C-reactive protein.<sup>46,139–141</sup> Notably, we identified 21 MT genes of lipid metabolism, although this was not the direct focus of our study. For example, *TMLHE* (Xq28 [MIM: 300777]), trimethyllysine dioxygenase associated with HbA1c,  $p = 2.2E-19$  is the first enzyme in the carnitine biosynthesis pathway. Carnitine play an essential role in the transport of activated fatty acids across the inner mitochondrial membrane and this gene is ubiquitous for its expression in heart. Hence, MT associations with other traits at the consortia-level remain to be explored. In conclusion, we identified common, rare SNVs, and a gene burden of genetic mtDNA variants, as well as 109 MT-nDNA genes associated with metabolic traits. Of the 109 MT-nDNA candidate genes, a subset pointed to associations with adipose, glucose metabolism, T2D, and CVD, and a subset of SNVs was inferred to contribute for differential regulatory genes expression. We documented in this study that the MT-candidates (SNVs/genes) have special contributions for functioning and energy homeostasis in adipose tissues and to glucose metabolism and insulin signaling.

### Accession Numbers

Summary statistics for the mtDNA meta-analyses are available in the dbGaP repository for the CHARGE Consortium, phs000930.v8.p1.

### Supplemental Data

Supplemental Data include 17 figures, 32 tables, Supplemental Material and Methods, Supplemental Acknowledgments, and Supplemental Study Descriptions and can be found with this article online at <https://doi.org/10.1016/j.ajhg.2018.12.001>.

### Acknowledgments

A.E. Justice is supported by a K99/R00 from the National Institutes of Health, National Heart, Lung, and Blood Institute (NHLBI) (5K99HL130580-02 and 5R00HL130580-04). G. Hudson has received funding support by Wellcome Trust Centre for Mitochondrial Research, Grant Code G906919. J.I.R., X.G., Y.-D.I.C., K.D.T., Y.H., K.S., and J.Y. have received NIH support for research related to mitochondria. A.T.K., C. Liu, J.L.F., M. Graff, C.T.H., C.G., L.R.Y., M.F.F., D.E.A., D.I.C., K.Y., W.D.H., S.J.L., L.W., T.J.B., L.D.L.-G., T.I.A.S., G. Hudson, D.L., A.N.M., D.M.B., M.A.P., J.B.M., J.I.R., and K.E.N. were the writing group for this paper. M.A.P. and K.E.N. are from the CHARGE ADIPOSITY working group; J.I.R. and J.B.M. are from the CHARGE DIABETES working group.

### Declaration of Interests

A.Y.C. is currently an employee of Merck & Co. C.T.-P. has received grants from Bayer pertaining to antithrombotic treatment of atrial fibrillation and cardiac valve replacements. D.O.M.-K. works as a part-time clinical research consultant for Metabolon, Inc. The remaining authors declare no competing financial interests.

## Web Resources

1000 Genomes data (released April 2016), <http://ftp.1000genomes.ebi.ac.uk/vol1/ftp/release/20130502/>  
dbGaP, <https://www.ncbi.nlm.nih.gov/gap>  
EasyQC, <http://www.genepi-regensburg.de/easyqc/>  
FCGENE, <https://sourceforge.net/projects/fcgene/>  
GenBank (NCBI Reference Sequence: NC\_012920.1), <https://www.ncbi.nlm.nih.gov/nucore/251831106>  
GIANT Consortium repositories, [https://portals.broadinstitute.org/collaboration/giant/index.php/GIANT\\_consortium\\_data\\_files](https://portals.broadinstitute.org/collaboration/giant/index.php/GIANT_consortium_data_files)  
GTEx (Gene Expression Portal), <https://gtexportal.org>  
GWAS Catalog, <http://www.ebi.ac.uk/gwas/>  
Human Mitochondrion Sequence, <https://www.mitomap.org/MITOMAP/HumanMitoSeq>  
IMPUTE2, [http://mathgen.stats.ox.ac.uk/impute/impute\\_v2.html](http://mathgen.stats.ox.ac.uk/impute/impute_v2.html)  
KEGG, [https://www.genome.jp/dbget-bin/www\\_bget?hsa04979](https://www.genome.jp/dbget-bin/www_bget?hsa04979)  
MAGIC consortium archives, <https://www.magicinvestigators.org/downloads/>  
OMIM, <http://www.omim.org/>  
Protein-Protein Interactions, <ftp://ftp.ncbi.nih.gov/gene/GeneRIF/seqMeta>, <https://github.com/DavisBrian/seqMeta>  
seqMeta release notes, <https://cran.r-project.org/web/packages/seqMeta/seqMeta.pdf>  
SHAPEIT2, [https://mathgen.stats.ox.ac.uk/genetics\\_software/shapeit/shapeit.html#home](https://mathgen.stats.ox.ac.uk/genetics_software/shapeit/shapeit.html#home)  
The Human Protein Atlas, <http://www.proteinatlas.org/>

## References

1. Wang, Z., Ying, Z., Bosty-Westphal, A., Zhang, J., Schautz, B., Later, W., Heymsfield, S.B., and Müller, M.J. (2010). Specific metabolic rates of major organs and tissues across adulthood: evaluation by mechanistic model of resting energy expenditure. *Am. J. Clin. Nutr.* *92*, 1369–1377.
2. Ernster, L., and Schatz, G. (1981). Mitochondria: a historical review. *J. Cell Biol.* *91*, 227s–255s.
3. Chow, J., Rahman, J., Achermann, J.C., Dattani, M.T., and Rahman, S. (2017). Mitochondrial disease and endocrine dysfunction. *Nat. Rev. Endocrinol.* *13*, 92–104.
4. Prasai, K. (2017). Regulation of mitochondrial structure and function by protein import: A current review. *Pathophysiology* *24*, 107–122.
5. Lang, B.F., Gray, M.W., and Burger, G. (1999). Mitochondrial genome evolution and the origin of eukaryotes. *Annu. Rev. Genet.* *33*, 351–397.
6. Pagliarini, D.J., Calvo, S.E., Chang, B., Sheth, S.A., Vafai, S.B., Ong, S.E., Walford, G.A., Sugiana, C., Boneh, A., Chen, W.K., et al. (2008). A mitochondrial protein compendium elucidates complex I disease biology. *Cell* *134*, 112–123.
7. Smith, A.C., and Robinson, A.J. (2016). MitoMiner v3.1, an update on the mitochondrial proteomics database. *Nucleic Acids Res.* *44* (D1), D1258–D1261.
8. Febbo, P.G., Mulligan, M.G., Slonina, D.A., Stegmaier, K., Di Vizio, D., Martinez, P.R., Loda, M., and Taylor, S.C. (2007). Literature Lab: a method of automated literature inter-

- rogation to infer biology from microarray analysis. *BMC Genomics* *8*, 461.
9. Haag-Liautard, C., Coffey, N., Houle, D., Lynch, M., Charlesworth, B., and Keightley, P.D. (2008). Direct estimation of the mitochondrial DNA mutation rate in *Drosophila melanogaster*. *PLoS Biol.* *6*, e204.
  10. Neiman, M., and Taylor, D.R. (2009). The causes of mutation accumulation in mitochondrial genomes. *Proc. Biol. Sci.* *276*, 1201–1209.
  11. Craven, L., Alston, C.L., Taylor, R.W., and Turnbull, D.M. (2017). Recent advances in mitochondrial disease. *Annu. Rev. Genomics Hum. Genet.* *18*, 257–275.
  12. Schaefer, A.M., Walker, M., Turnbull, D.M., and Taylor, R.W. (2013). Endocrine disorders in mitochondrial disease. *Mol. Cell. Endocrinol.* *379*, 2–11.
  13. Malik, A.N., and Czajka, A. (2013). Is mitochondrial DNA content a potential biomarker of mitochondrial dysfunction? *Mitochondrion* *13*, 481–492.
  14. Ashar, F.N., Moes, A., Moore, A.Z., Grove, M.L., Chaves, P.H.M., Coresh, J., Newman, A.B., Matteini, A.M., Bandeen-Roche, K., Boerwinkle, E., et al. (2015). Association of mitochondrial DNA levels with frailty and all-cause mortality. *J. Mol. Med. (Berl.)* *93*, 177–186.
  15. Mengel-From, J., Thinggaard, M., Dalgård, C., Kyvik, K.O., Christensen, K., and Christiansen, L. (2014). Mitochondrial DNA copy number in peripheral blood cells declines with age and is associated with general health among elderly. *Hum. Genet.* *133*, 1149–1159.
  16. Ashar, F.N., Zhang, Y., Longchamps, R.J., Lane, J., Moes, A., Grove, M.L., Mychaleckyj, J.C., Taylor, K.D., Coresh, J., Rotter, J.I., et al. (2017). Association of mitochondrial DNA copy number with cardiovascular disease. *JAMA Cardiol.* *2*, 1247–1255.
  17. Zhang, Y., Guallar, E., Ashar, F.N., Longchamps, R.J., Castellani, C.A., Lane, J., Grove, M.L., Coresh, J., Sotoodehnia, N., Ilkhanoff, L., et al. (2017). Association between mitochondrial DNA copy number and sudden cardiac death: findings from the Atherosclerosis Risk in Communities study (ARIC). *Eur. Heart J.* *38*, 3443–3448.
  18. Tin, A., Grams, M.E., Ashar, F.N., Lane, J.A., Rosenberg, A.Z., Grove, M.L., Boerwinkle, E., Selvin, E., Coresh, J., Pankratz, N., and Arking, D.E. (2016). Association between mitochondrial DNA copy number in peripheral blood and incident CKD in the Atherosclerosis Risk in Communities Study. *J. Am. Soc. Nephrol.* *27*, 2467–2473.
  19. Heinonen, S., Buzkova, J., Muniandy, M., Kaksonen, R., Ollikainen, M., Ismail, K., Hakkarainen, A., Lundbom, J., Lundbom, N., Vuolteenaho, K., et al. (2015). Impaired mitochondrial biogenesis in adipose tissue in acquired obesity. *Diabetes* *64*, 3135–3145.
  20. De Pauw, A., Tejerina, S., Raes, M., Keijer, J., and Arnould, T. (2009). Mitochondrial (dys)function in adipocyte (de)differentiation and systemic metabolic alterations. *Am. J. Pathol.* *175*, 927–939.
  21. Altshuler-Keylin, S., and Kajimura, S. (2017). Mitochondrial homeostasis in adipose tissue remodeling. *Sci. Signal.* *10*, 10.
  22. Montgomery, M.K., and Turner, N. (2015). Mitochondrial dysfunction and insulin resistance: an update. *Endocr. Connect.* *4*, R1–R15.
  23. Vernochet, C., Damilano, F., Mourier, A., Bezy, O., Mori, M.A., Smyth, G., Rosenzweig, A., Larsson, N.G., and Kahn,

- C.R. (2014). Adipose tissue mitochondrial dysfunction triggers a lipodystrophic syndrome with insulin resistance, hepatosteatosis, and cardiovascular complications. *FASEB J.* *28*, 4408–4419.
24. Wiklund, P., Zhang, X., Pekkala, S., Autio, R., Kong, L., Yang, Y., Keinänen-Kiukaanniemi, S., Alen, M., and Cheng, S. (2016). Insulin resistance is associated with altered amino acid metabolism and adipose tissue dysfunction in normoglycemic women. *Sci. Rep.* *6*, 24540.
  25. Beasley, T.M., Erickson, S., and Allison, D.B. (2009). Rank-based inverse normal transformations are increasingly used, but are they merited? *Behav. Genet.* *39*, 580–595.
  26. Kearse, M., Moir, R., Wilson, A., Stones-Havas, S., Cheung, M., Sturrock, S., Buxton, S., Cooper, A., Markowitz, S., Duran, C., et al. (2012). Geneious Basic: an integrated and extendable desktop software platform for the organization and analysis of sequence data. *Bioinformatics* *28*, 1647–1649.
  27. Purcell, S., Neale, B., Todd-Brown, K., Thomas, L., Ferreira, M.A., Bender, D., Maller, J., Sklar, P., de Bakker, P.I., Daly, M.J., and Sham, P.C. (2007). PLINK: a tool set for whole-genome association and population-based linkage analyses. *Am. J. Hum. Genet.* *81*, 559–575.
  28. Chang, C.C., Chow, C.C., Tellier, L.C., Vattikuti, S., Purcell, S.M., and Lee, J.J. (2015). Second-generation PLINK: rising to the challenge of larger and richer datasets. *Gigascience* *4*, 7.
  29. Delaneau, O., Zagury, J.F., and Marchini, J. (2013). Improved whole-chromosome phasing for disease and population genetic studies. *Nat. Methods* *10*, 5–6.
  30. Howie, B.N., Donnelly, P., and Marchini, J. (2009). A flexible and accurate genotype imputation method for the next generation of genome-wide association studies. *PLoS Genet.* *5*, e1000529.
  31. Delaneau, O., Marchini, J.; and 1000 Genomes Project Consortium (2014). Integrating sequence and array data to create an improved 1000 Genomes Project haplotype reference panel. *Nat. Commun.* *5*, 3934.
  32. Winkler, T.W., Day, F.R., Croteau-Chonka, D.C., Wood, A.R., Locke, A.E., Mägi, R., Ferreira, T., Fall, T., Graff, M., Justice, A.E., et al.; Genetic Investigation of Anthropometric Traits (GIANT) Consortium (2014). Quality control and conduct of genome-wide association meta-analyses. *Nat. Protoc.* *9*, 1192–1212.
  33. Chen, H., Meigs, J.B., and Dupuis, J. (2013). Sequence kernel association test for quantitative traits in family samples. *Genet. Epidemiol.* *37*, 196–204.
  34. Liu, C., Dupuis, J., Larson, M.G., and Levy, D. (2013). Association testing of the mitochondrial genome using pedigree data. *Genet. Epidemiol.* *37*, 239–247.
  35. Willer, C.J., Li, Y., and Abecasis, G.R. (2010). METAL: fast and efficient meta-analysis of genomewide association scans. *Bioinformatics* *26*, 2190–2191.
  36. Huang, H., Chanda, P., Alonso, A., Bader, J.S., and Arking, D.E. (2011). Gene-based tests of association. *PLoS Genet.* *7*, e1002177.
  37. Wang, L., Lee, S., Gim, J., Qiao, D., Cho, M., Elston, R.C., Silverman, E.K., and Won, S. (2016). Family-based rare variant association analysis: A fast and efficient method of multivariate phenotype association analysis. *Genet. Epidemiol.* *40*, 502–511.
  38. Lee, S., Abecasis, G.R., Boehnke, M., and Lin, X. (2014). Rare-variant association analysis: study designs and statistical tests. *Am. J. Hum. Genet.* *95*, 5–23.
  39. Calvo, S.E., Clauser, K.R., and Mootha, V.K. (2016). MitoCarta2.0: an updated inventory of mammalian mitochondrial proteins. *Nucleic Acids Res.* *44* (D1), D1251–D1257.
  40. Lu, H., Koshkin, V., Allister, E.M., Gyulkhandanyan, A.V., and Wheeler, M.B. (2010). Molecular and metabolic evidence for mitochondrial defects associated with beta-cell dysfunction in a mouse model of type 2 diabetes. *Diabetes* *59*, 448–459.
  41. Speliotes, E.K., Willer, C.J., Berndt, S.I., Monda, K.L., Thorleifsson, G., Jackson, A.U., Lango Allen, H., Lindgren, C.M., Luan, J., Mägi, R., et al.; MAGIC; and Procardis Consortium (2010). Association analyses of 249,796 individuals reveal 18 new loci associated with body mass index. *Nat. Genet.* *42*, 937–948.
  42. Yang, J., Loos, R.J., Powell, J.E., Medland, S.E., Speliotes, E.K., Chasman, D.I., Rose, L.M., Thorleifsson, G., Steinthorsdottir, V., Mägi, R., et al. (2012). FTO genotype is associated with phenotypic variability of body mass index. *Nature* *490*, 267–272.
  43. Berndt, S.I., Gustafsson, S., Mägi, R., Ganna, A., Wheeler, E., Feitosa, M.F., Justice, A.E., Monda, K.L., Croteau-Chonka, D.C., Day, F.R., et al. (2013). Genome-wide meta-analysis identifies 11 new loci for anthropometric traits and provides insights into genetic architecture. *Nat. Genet.* *45*, 501–512.
  44. Randall, J.C., Winkler, T.W., Kutalik, Z., Berndt, S.I., Jackson, A.U., Monda, K.L., Kilpeläinen, T.O., Esko, T., Mägi, R., Li, S., et al.; DIAGRAM Consortium; and MAGIC Investigators (2013). Sex-stratified genome-wide association studies including 270,000 individuals show sexual dimorphism in genetic loci for anthropometric traits. *PLoS Genet.* *9*, e1003500.
  45. Monda, K.L., Chen, G.K., Taylor, K.C., Palmer, C., Edwards, T.L., Lange, L.A., Ng, M.C., Adeyemo, A.A., Allison, M.A., Bielak, L.F., et al.; NABEC Consortium; UKBEC Consortium; BioBank Japan Project; and AGEN Consortium (2013). A meta-analysis identifies new loci associated with body mass index in individuals of African ancestry. *Nat. Genet.* *45*, 690–696.
  46. Locke, A.E., Kahali, B., Berndt, S.I., Justice, A.E., Pers, T.H., Day, F.R., Powell, C., Vedantam, S., Buchkovich, M.L., Yang, J., et al.; LifeLines Cohort Study; ADIPOGen Consortium; AGEN-BMI Working Group; CARDIOGRAMplusC4D Consortium; CKDGen Consortium; GLGC; ICBP; MAGIC Investigators; MuTHER Consortium; MIGen Consortium; PAGE Consortium; ReproGen Consortium; GENIE Consortium; and International Endogene Consortium (2015). Genetic studies of body mass index yield new insights for obesity biology. *Nature* *518*, 197–206.
  47. Shungin, D., Winkler, T.W., Croteau-Chonka, D.C., Ferreira, T., Locke, A.E., Mägi, R., Strawbridge, R.J., Pers, T.H., Fischer, K., Justice, A.E., et al.; ADIPOGen Consortium; CARDIOGRAM plusC4D Consortium; CKDGen Consortium; GEFOS Consortium; GENIE Consortium; GLGC; ICBP; International Endogene Consortium; LifeLines Cohort Study; MAGIC Investigators; MuTHER Consortium; PAGE Consortium; and ReproGen Consortium (2015). New genetic loci link adipose and insulin biology to body fat distribution. *Nature* *518*, 187–196.
  48. Winkler, T.W., Justice, A.E., Graff, M., Barata, L., Feitosa, M.F., Chu, S., Czajkowski, J., Esko, T., Fall, T., Kilpeläinen, T.O., et al.; CHARGE Consortium; DIAGRAM Consortium; GLGC Consortium; Global-BPGen Consortium; ICBP Consortium; and MAGIC Consortium (2015). The influence of age and sex on genetic associations with adult body size

- and shape: a large-scale genome-wide interaction study. *PLoS Genet.* *11*, e1005378.
49. Ng, M.C.Y., Graff, M., Lu, Y., Justice, A.E., Mudgal, P., Liu, C.T., Young, K., Yanek, L.R., Feitosa, M.F., Wojczynski, M.K., et al.; Bone Mineral Density in Childhood Study (BMDCS) Group (2017). Discovery and fine-mapping of adiposity loci using high density imputation of genome-wide association studies in individuals of African ancestry: African Ancestry Anthropometry Genetics Consortium. *PLoS Genet.* *13*, e1006719.
  50. Justice, A.E., Winkler, T.W., Feitosa, M.F., Graff, M., Fisher, V.A., Young, K., Barata, L., Deng, X., Czajkowski, J., Hadley, D., et al. (2017). Genome-wide meta-analysis of 241,258 adults accounting for smoking behaviour identifies novel loci for obesity traits. *Nat. Commun.* *8*, 14977.
  51. Heid, I.M., Jackson, A.U., Randall, J.C., Winkler, T.W., Qi, L., Steinthorsdottir, V., Thorleifsson, G., Zillikens, M.C., Spegliotes, E.K., Mägi, R., et al.; MAGIC (2010). Meta-analysis identifies 13 new loci associated with waist-hip ratio and reveals sexual dimorphism in the genetic basis of fat distribution. *Nat. Genet.* *42*, 949–960.
  52. Graff, M., Scott, R.A., Justice, A.E., Young, K.L., Feitosa, M.F., Barata, L., Winkler, T.W., Chu, A.Y., Mahajan, A., Hadley, D., et al.; CHARGE Consortium; EPIC-InterAct Consortium; and PAGE Consortium (2017). Genome-wide physical activity interactions in adiposity - A meta-analysis of 200,452 adults. *PLoS Genet.* *13*, e1006528.
  53. Saxena, R., Hivert, M.F., Langenberg, C., Tanaka, T., Pankow, J.S., Vollenweider, P., Lyssenko, V., Bouatia-Naji, N., Dupuis, J., Jackson, A.U., et al.; GIANT consortium; and MAGIC investigators (2010). Genetic variation in GIPR influences the glucose and insulin responses to an oral glucose challenge. *Nat. Genet.* *42*, 142–148.
  54. Dupuis, J., Langenberg, C., Prokopenko, I., Saxena, R., Soranzo, N., Jackson, A.U., Wheeler, E., Glazer, N.L., Bouatia-Naji, N., Gloyn, A.L., et al.; DIAGRAM Consortium; GIANT Consortium; Global BPgen Consortium; Anders Hamsten on behalf of Procardis Consortium; and MAGIC investigators (2010). New genetic loci implicated in fasting glucose homeostasis and their impact on type 2 diabetes risk. *Nat. Genet.* *42*, 105–116.
  55. Manning, A.K., Hivert, M.F., Scott, R.A., Grimsby, J.L., Bouatia-Naji, N., Chen, H., Rybin, D., Liu, C.T., Bielak, L.F., Prokopenko, I., et al.; DIABetes Genetics Replication And Meta-analysis (DIAGRAM) Consortium; and Multiple Tissue Human Expression Resource (MUTHER) Consortium (2012). A genome-wide approach accounting for body mass index identifies genetic variants influencing fasting glycemic traits and insulin resistance. *Nat. Genet.* *44*, 659–669.
  56. Scott, R.A., Lagou, V., Welch, R.P., Wheeler, E., Montasser, M.E., Luan, J., Mägi, R., Strawbridge, R.J., Rehnberg, E., Gustafsson, S., et al.; DIABetes Genetics Replication and Meta-analysis (DIAGRAM) Consortium (2012). Large-scale association analyses identify new loci influencing glycemic traits and provide insight into the underlying biological pathways. *Nat. Genet.* *44*, 991–1005.
  57. Prokopenko, I., Poon, W., Mägi, R., Prasad B, R., Salehi, S.A., Almgren, P., Osmark, P., Bouatia-Naji, N., Wierup, N., Fall, T., et al. (2014). A central role for GRB10 in regulation of islet function in man. *PLoS Genet.* *10*, e1004235.
  58. Strawbridge, R.J., Dupuis, J., Prokopenko, I., Barker, A., Ahlqvist, E., Rybin, D., Petrie, J.R., Travers, M.E., Bouatia-Naji, N., Dimas, A.S., et al.; DIAGRAM Consortium; GIANT Consortium; MuTHER Consortium; CARDIoGRAM Consortium; and C4D Consortium (2011). Genome-wide association identifies nine common variants associated with fasting proinsulin levels and provides new insights into the pathophysiology of type 2 diabetes. *Diabetes* *60*, 2624–2634.
  59. Walford, G.A., Gustafsson, S., Rybin, D., Stančáková, A., Chen, H., Liu, C.T., Hong, J., Jensen, R.A., Rice, K., Morris, A.P., et al. (2016). Genome-wide association study of the modified Stumvoll insulin sensitivity index identifies BCL2 and FAM19A2 as novel insulin sensitivity loci. *Diabetes* *65*, 3200–3211.
  60. Soranzo, N., Sanna, S., Wheeler, E., Gieger, C., Radke, D., Dupuis, J., Bouatia-Naji, N., Langenberg, C., Prokopenko, I., Stollerman, E., et al.; WTCCC (2010). Common variants at 10 genomic loci influence hemoglobin A<sub>1c</sub> levels via glycemic and nonglycemic pathways. *Diabetes* *59*, 3229–3239.
  61. Wheeler, E., Leong, A., Liu, C.T., Hivert, M.F., Strawbridge, R.J., Podmore, C., Li, M., Yao, J., Sim, X., Hong, J., et al.; EPIC-CVD Consortium; EPIC-InterAct Consortium; and Lifelines Cohort Study (2017). Impact of common genetic determinants of Hemoglobin A1c on type 2 diabetes risk and diagnosis in ancestrally diverse populations: A transethnic genome-wide meta-analysis. *PLoS Med.* *14*, e1002383.
  62. Chanda, P., Huang, H., Arking, D.E., and Bader, J.S. (2013). Fast association tests for genes with FAST. *PLoS ONE* *8*, e68585.
  63. Zhao, W., Rasheed, A., Tikkanen, E., Lee, J.J., Butterworth, A.S., Howson, J.M.M., Assimes, T.L., Chowdhury, R., Orholm, Melander, M., Damrauer, S., et al.; CHD Exome+ Consortium; EPIC-CVD Consortium; EPIC-Interact Consortium; and Michigan Biobank (2017). Identification of new susceptibility loci for type 2 diabetes and shared etiological pathways with coronary heart disease. *Nat. Genet.* *49*, 1450–1457.
  64. Spracklen, C.N., Chen, P., Kim, Y.J., Wang, X., Cai, H., Li, S., Long, J., Wu, Y., Wang, Y.X., Takeuchi, F., et al. (2017). Association analyses of East Asian individuals and trans-ancestry analyses with European individuals reveal new loci associated with cholesterol and triglyceride levels. *Hum. Mol. Genet.* *26*, 1770–1784.
  65. Nelson, C.P., Goel, A., Butterworth, A.S., Kanoni, S., Webb, T.R., Marouli, E., Zeng, L., Ntalla, I., Lai, F.Y., Hopewell, J.C., et al.; EPIC-CVD Consortium; CARDIoGRAMplusC4D; and UK Biobank CardioMetabolic Consortium CHD working group (2017). Association analyses based on false discovery rate implicate new loci for coronary artery disease. *Nat. Genet.* *49*, 1385–1391.
  66. Eppinga, R.N., Hagemeijer, Y., Burgess, S., Hinds, D.A., Stefansson, K., Gudbjartsson, D.F., van Veldhuisen, D.J., Munroe, P.B., Verweij, N., and van der Harst, P. (2016). Identification of genomic loci associated with resting heart rate and shared genetic predictors with all-cause mortality. *Nat. Genet.* *48*, 1557–1563.
  67. Warren, H.R., Evangelou, E., Cabrera, C.P., Gao, H., Ren, M., Mifsud, B., Ntalla, I., Surendran, P., Liu, C., Cook, J.P., et al.; International Consortium of Blood Pressure (ICBP) 1000G Analyses; BIOS Consortium; Lifelines Cohort Study; Understanding Society Scientific group; CHD Exome+ Consortium; ExomeBP Consortium; T2D-GENES Consortium; GoT2DGenes Consortium; Cohorts for Heart and Ageing

- Research in Genome Epidemiology (CHARGE) BP Exome Consortium; International Genomics of Blood Pressure (iGEN-BP) Consortium; and UK Biobank CardioMetabolic Consortium BP working group (2017). Genome-wide association analysis identifies novel blood pressure loci and offers biological insights into cardiovascular risk. *Nat. Genet.* **49**, 403–415.
68. Sabater-Lleal, M., Huang, J., Chasman, D., Naitza, S., Dehghan, A., Johnson, A.D., Teumer, A., Reiner, A.P., Folkersen, L., Basu, S., et al.; VTE Consortium; STROKE Consortium; Wellcome Trust Case Control Consortium 2 (WTCCC2); C4D Consortium; and CARDIOGRAM Consortium (2013). Multiethnic meta-analysis of genome-wide association studies in >100 000 subjects identifies 23 fibrinogen-associated loci but no strong evidence of a causal association between circulating fibrinogen and cardiovascular disease. *Circulation* **128**, 1310–1324.
  69. Willer, C.J., Schmidt, E.M., Sengupta, S., Peloso, G.M., Gustafsson, S., Kanoni, S., Ganna, A., Chen, J., Buchkovich, M.L., Mora, S., et al.; Global Lipids Genetics Consortium (2013). Discovery and refinement of loci associated with lipid levels. *Nat. Genet.* **45**, 1274–1283.
  70. Mozaffarian, D., Kabagambe, E.K., Johnson, C.O., Lemaitre, R.N., Manichaikul, A., Sun, Q., Foy, M., Wang, L., Wiener, H., Irvin, M.R., et al. (2015). Genetic loci associated with circulating phospholipid trans fatty acids: a meta-analysis of genome-wide association studies from the CHARGE Consortium. *Am. J. Clin. Nutr.* **101**, 398–406.
  71. Yeo, A., Li, L., Warren, L., Aponte, J., Fraser, D., King, K., Johansson, K., Barnes, A., MacPhee, C., Davies, R., et al. (2017). Pharmacogenetic meta-analysis of baseline risk factors, pharmacodynamic, efficacy and tolerability endpoints from two large global cardiovascular outcomes trials for darapladib. *PLoS ONE* **12**, e0182115.
  72. Hinds, D.A., Buil, A., Ziemek, D., Martinez-Perez, A., Malik, R., Folkersen, L., Germain, M., Mälarstig, A., Brown, A., Soria, J.M., et al.; METASTROKE Consortium, INVENT Consortium (2016). Genome-wide association analysis of self-reported events in 6135 individuals and 252 827 controls identifies 8 loci associated with thrombosis. *Hum. Mol. Genet.* **25**, 1867–1874.
  73. Ehret, G.B., Munroe, P.B., Rice, K.M., Bochud, M., Johnson, A.D., Chasman, D.I., Smith, A.V., Tobin, M.D., Verwoert, G.C., Hwang, S.J., et al.; International Consortium for Blood Pressure Genome-Wide Association Studies; CARDIOGRAM consortium; CKDGen Consortium; KidneyGen Consortium; EchoGen consortium; and CHARGE-HF consortium (2011). Genetic variants in novel pathways influence blood pressure and cardiovascular disease risk. *Nature* **478**, 103–109.
  74. van der Harst, P., van Setten, J., Verweij, N., Vogler, G., Franke, L., Maurano, M.T., Wang, X., Mateo Leach, I., Eijgelsheim, M., Sotoodehnia, N., et al. (2016). 52 genetic loci influencing myocardial mass. *J. Am. Coll. Cardiol.* **68**, 1435–1448.
  75. Pott, J., Burkhardt, R., Beutner, F., Horn, K., Teren, A., Kirsten, H., Holdt, L.M., Schuler, G., Teupser, D., Loeffler, M., et al. (2017). Genome-wide meta-analysis identifies novel loci of plaque burden in carotid artery. *Atherosclerosis* **259**, 32–40.
  76. Yasuno, K., Bilguvar, K., Bijlenga, P., Low, S.K., Krschek, B., Auburger, G., Simon, M., Krex, D., Arlier, Z., Nayak, N., et al. (2010). Genome-wide association study of intracranial aneurysm identifies three new risk loci. *Nat. Genet.* **42**, 420–425.
  77. Aulchenko, Y.S., Ripatti, S., Lindqvist, I., Boomsma, D., Heid, I.M., Pramstaller, P.P., Penninx, B.W., Janssens, A.C., Wilson, J.F., Spector, T., et al.; ENGAGE Consortium (2009). Loci influencing lipid levels and coronary heart disease risk in 16 European population cohorts. *Nat. Genet.* **41**, 47–55.
  78. Boyle, A.P., Hong, E.L., Hariharan, M., Cheng, Y., Schaub, M.A., Kasowski, M., Karczewski, K.J., Park, J., Hitz, B.C., Weng, S., et al. (2012). Annotation of functional variation in personal genomes using RegulomeDB. *Genome Res.* **22**, 1790–1797.
  79. Esteras, N., Rohrer, J.D., Hardy, J., Wray, S., and Abramov, A.Y. (2017). Mitochondrial hyperpolarization in iPSC-derived neurons from patients of FTDP-17 with 10+16 MAPT mutation leads to oxidative stress and neurodegeneration. *Redox Biol.* **12**, 410–422.
  80. Ward, L.D., and Kellis, M. (2012). HaploReg: a resource for exploring chromatin states, conservation, and regulatory motif alterations within sets of genetically linked variants. *Nucleic Acids Res.* **40**, D930–D934.
  81. Battle, A., Brown, C.D., Engelhardt, B.E., Montgomery, S.B.; GTEx Consortium; Laboratory, Data Analysis & Coordinating Center (LDACC)—Analysis Working Group; Statistical Methods groups—Analysis Working Group; Enhancing GTEx (eGTEx) groups; NIH Common Fund; NIH/NCI; NIH/NHGRI; NIH/NIMH; NIH/NIDA; Biospecimen Collection Source Site—NDRI; Biospecimen Collection Source Site—RPCI; Biospecimen Core Resource—VARI; Brain Bank Repository—University of Miami Brain Endowment Bank; Leidos Biomedical—Project Management; ELSI Study; Genome Browser Data Integration & Visualization—EBI; Genome Browser Data Integration & Visualization—UCSC Genomics Institute, University of California Santa Cruz; Lead analysts; Laboratory, Data Analysis & Coordinating Center (LDACC); NIH program management; Biospecimen collection; Pathology; and eQTL manuscript working group (2017). Genetic effects on gene expression across human tissues. *Nature* **550**, 204–213.
  82. Saha, A., Kim, Y., Gewirtz, A.D.H., Jo, B., Gao, C., McDowell, I.C., Engelhardt, B.E., Battle, A.; and GTEx Consortium (2017). Co-expression networks reveal the tissue-specific regulation of transcription and splicing. *Genome Res.* **27**, 1843–1858.
  83. Li, M.J., Wang, L.Y., Xia, Z., Sham, P.C., and Wang, J. (2013). GWAS3D: Detecting human regulatory variants by integrative analysis of genome-wide associations, chromosome interactions and histone modifications. *Nucleic Acids Res.* **41**, W150–8.
  84. Sané, A.T., Seidman, E., Peretti, N., Kleme, M.L., Delvin, E., Deslandres, C., Garofalo, C., Spahis, S., and Levy, E. (2017). Understanding chylomicron retention disease through Sar1b Gtpase gene disruption: insight from cell culture. *Arterioscler. Thromb. Vasc. Biol.* **37**, 2243–2251.
  85. Yuasa, K., Matsuda, T., and Tsuji, A. (2011). Functional regulation of transient receptor potential canonical 7 by cGMP-dependent protein kinase  $\alpha$ . *Cell. Signal.* **23**, 1179–1187.
  86. Ilegems, E., Iwatsuki, K., Kokrashvili, Z., Benard, O., Nino-miya, Y., and Margolske, R.F. (2010). REEP2 enhances sweet receptor function by recruitment to lipid rafts. *J. Neurosci.* **30**, 13774–13783.



87. Szklarczyk, D., Franceschini, A., Wyder, S., Forslund, K., Heller, D., Huerta-Cepas, J., Simonovic, M., Roth, A., Santos, A., Tsafou, K.P., et al. (2015). STRING v10: protein-protein interaction networks, integrated over the tree of life. *Nucleic Acids Res.* *43*, D447–D452.
88. Pattin, K.A., and Moore, J.H. (2009). Role for protein-protein interaction databases in human genetics. *Expert Rev. Proteomics* *6*, 647–659.
89. Taniguchi, K., Matsumura, K., Kageyama, S., Ii, H., Ashihara, E., Chano, T., Kawachi, A., Yoshiki, T., and Nakata, S. (2018). Prohibitin-2 is a novel regulator of p21<sup>WAF1/CIP1</sup> induced by depletion of  $\gamma$ -glutamylcyclotransferase. *Biochem. Biophys. Res. Commun.* *496*, 218–224.
90. Fimia, G.M., Corazzari, M., Antonoli, M., and Piacentini, M. (2013). Ambra1 at the crossroad between autophagy and cell death. *Oncogene* *32*, 3311–3318.
91. Fimia, G.M., Stoykova, A., Romagnoli, A., Giunta, L., Di Bartolomeo, S., Nardacci, R., Corazzari, M., Fuoco, C., Ucar, A., Schwartz, P., et al. (2007). Ambra1 regulates autophagy and development of the nervous system. *Nature* *447*, 1121–1125.
92. Frazier, A.E., Thorburn, D.R., and Compton, A.G. (2017). Mitochondrial energy generation disorders: genes, mechanisms and clues to pathology. *J. Biol. Chem.* *jbc.R117.809194*.
93. Malik, A.N., Parsade, C.K., Ajaz, S., Crosby-Nwaobi, R., Gnudi, L., Czajka, A., and Sivaprasad, S. (2015). Altered circulating mitochondrial DNA and increased inflammation in patients with diabetic retinopathy. *Diabetes Res. Clin. Pract.* *110*, 257–265.
94. Guo, H., Bueler, S.A., and Rubinstein, J.L. (2017). Atomic model for the dimeric F<sub>O</sub> region of mitochondrial ATP synthase. *Science* *358*, 936–940.
95. Nakamoto, R.K., Baylis Scanlon, J.A., and Al-Shawi, M.K. (2008). The rotary mechanism of the ATP synthase. *Arch. Biochem. Biophys.* *476*, 43–50.
96. Fish, J., Raule, N., and Attardi, G. (2004). Discovery of a major D-loop replication origin reveals two modes of human mtDNA synthesis. *Science* *306*, 2098–2101.
97. Taanman, J.W. (1999). The mitochondrial genome: structure, transcription, translation and replication. *Biochim. Biophys. Acta* *1410*, 103–123.
98. Wang, H.N., Chen, H.D., Chen, K.Y., Xiao, J.F., He, K., Xiang, G.A., and Xie, X. (2014). Highly expressed MT-ND3 positively associated with histological severity of hepatic steatosis. *APMIS* *122*, 443–451.
99. Fetterman, J.L., Liu, C., Mitchell, G.F., Vasan, R.S., Benjamin, E.J., Vita, J.A., Hamburg, N.M., and Levy, D. (2018). Relations of mitochondrial genetic variants to measures of vascular function. *Mitochondrion* *40*, 51–57.
100. Brown, D.A., Perry, J.B., Allen, M.E., Sabbah, H.N., Stauffer, B.L., Shaikh, S.R., Cleland, J.G., Colucci, W.S., Butler, J., Voors, A.A., et al. (2017). Expert consensus document: Mitochondrial function as a therapeutic target in heart failure. *Nat. Rev. Cardiol.* *14*, 238–250.
101. McDermott-Roe, C., Leleu, M., Rowe, G.C., Palygin, O., Bukowy, J.D., Kuo, J., Rech, M., Hermans-Beijnsberger, S., Schaefer, S., Adami, E., et al. (2017). Transcriptome-wide co-expression analysis identifies LRRC2 as a novel mediator of mitochondrial and cardiac function. *PLoS ONE* *12*, e0170458.
102. Lee, H.S., and Park, T. (2017). Pathway-driven approaches of interaction between oxidative balance and genetic polymorphism on metabolic syndrome. *Oxid. Med. Cell. Longev.* *2017*, 6873197.
103. Go, M.J., Hwang, J.Y., Kim, Y.J., Hee Oh, J., Kim, Y.J., Heon Kwak, S., Soo Park, K., Lee, J., Kim, B.J., Han, B.G., et al. (2013). New susceptibility loci in MYL2, C12orf51 and OAS1 associated with 1-h plasma glucose as predisposing risk factors for type 2 diabetes in the Korean population. *J. Hum. Genet.* *58*, 362–365.
104. Kristiansson, K., Perola, M., Tikkanen, E., Kettunen, J., Surakka, I., Havulinna, A.S., Stancáková, A., Barnes, C., Widen, E., Kajantie, E., et al. (2012). Genome-wide screen for metabolic syndrome susceptibility Loci reveals strong lipid gene contribution but no evidence for common genetic basis for clustering of metabolic syndrome traits. *Circ Cardiovasc Genet* *5*, 242–249.
105. MacDonald, M.J., and Fahien, L.A. (1990). Insulin release in pancreatic islets by a glycolytic and a Krebs cycle intermediate: contrasting patterns of glyceraldehyde phosphate and succinate. *Arch. Biochem. Biophys.* *279*, 104–108.
106. MacDonald, M.J., Fahien, L.A., Brown, L.J., Hasan, N.M., Buss, J.D., and Kendrick, M.A. (2005). Perspective: emerging evidence for signaling roles of mitochondrial anaplerotic products in insulin secretion. *Am. J. Physiol. Endocrinol. Metab.* *288*, E1–E15.
107. Dukes, I.D., McIntyre, M.S., Mertz, R.J., Philipson, L.H., Roe, M.W., Spencer, B., and Worley, J.F., 3rd. (1994). Dependence on NADH produced during glycolysis for beta-cell glucose signaling. *J. Biol. Chem.* *269*, 10979–10982.
108. El-Hattab, A.W., Emrick, L.T., Hsu, J.W., Chanprasert, S., Jahoor, F., Scaglia, F., and Craigen, W.J. (2014). Glucose metabolism derangements in adults with the MELAS m.3243A>G mutation. *Mitochondrion* *18*, 63–69.
109. Nóbrega-Pereira, S., Fernandez-Marcos, P.J., Briocche, T., Gomez-Cabrera, M.C., Salvador-Pascual, A., Flores, J.M., Viña, J., and Serrano, M. (2016). G6PD protects from oxidative damage and improves healthspan in mice. *Nat. Commun.* *7*, 10894.
110. Cunningham, A.D., Colavin, A., Huang, K.C., and Mochly-Rosen, D. (2017). Coupling between protein stability and catalytic activity determines pathogenicity of G6PD variants. *Cell Rep.* *18*, 2592–2599.
111. Dörner, G., Mohnike, A., and Steindel, E. (1975). On possible genetic and epigenetic modes of diabetes transmission. *Endokrinologie* *66*, 225–227.
112. Thomas, F., Balkau, B., Vauzelle-Kervroedan, F., Papoz, L.; and CODIAB-INSERM-ZENECA Study Group (1994). Maternal effect and familial aggregation in NIDDM. The CODIAB Study. *Diabetes* *43*, 63–67.
113. Lin, R.S., Lee, W.C., Lee, Y.T., Chou, P., and Fu, C.C. (1994). Maternal role in type 2 diabetes mellitus: indirect evidence for a mitochondrial inheritance. *Int. J. Epidemiol.* *23*, 886–890.
114. Voight, B.F., Scott, L.J., Steinthorsdottir, V., Morris, A.P., Dina, C., Welch, R.P., Zeggini, E., Huth, C., Aulchenko, Y.S., Thorleifsson, G., et al.; MAGIC investigators; and GIANT Consortium (2010). Twelve type 2 diabetes susceptibility loci identified through large-scale association analysis. *Nat. Genet.* *42*, 579–589.

115. Yasuda, K., Miyake, K., Horikawa, Y., Hara, K., Osawa, H., Furuta, H., Hirota, Y., Mori, H., Jonsson, A., Sato, Y., et al. (2008). Variants in *KCNQ1* are associated with susceptibility to type 2 diabetes mellitus. *Nat. Genet.* *40*, 1092–1097.
116. Unoki, H., Takahashi, A., Kawaguchi, T., Hara, K., Horikoshi, M., Andersen, G., Ng, D.P., Holmkvist, J., Borch-Johnsen, K., Jørgensen, T., et al. (2008). SNPs in *KCNQ1* are associated with susceptibility to type 2 diabetes in East Asian and European populations. *Nat. Genet.* *40*, 1098–1102.
117. Heard, E., Rougeulle, C., Arnaud, D., Avner, P., Allis, C.D., and Spector, D.L. (2001). Methylation of histone H3 at Lys-9 is an early mark on the X chromosome during X inactivation. *Cell* *107*, 727–738.
118. Lai, Y.K., Lai, N.M., and Lee, S.W. (2017). Glucose-6-phosphate dehydrogenase deficiency and risk of diabetes: a systematic review and meta-analysis. *Ann. Hematol.* *96*, 839–845.
119. Heymann, A.D., Cohen, Y., and Chodick, G. (2012). Glucose-6-phosphate dehydrogenase deficiency and type 2 diabetes. *Diabetes Care* *35*, e58.
120. van der Wijst, M.G., and Rots, M.G. (2015). Mitochondrial epigenetics: an overlooked layer of regulation? *Trends Genet.* *31*, 353–356.
121. Schleinitz, D., Klötting, N., Lindgren, C.M., Breitfeld, J., Dietrich, A., Schön, M.R., Lohmann, T., Dreßler, M., Stumvoll, M., McCarthy, M.I., et al. (2014). Fat depot-specific mRNA expression of novel loci associated with waist-hip ratio. *Int. J. Obes.* *38*, 120–125.
122. Meyre, D., Delplanque, J., Chèvre, J.C., Lecoœur, C., Lobbens, S., Gallina, S., Durand, E., Vatin, V., Degraeve, F., Proença, C., et al. (2009). Genome-wide association study for early-onset and morbid adult obesity identifies three new risk loci in European populations. *Nat. Genet.* *41*, 157–159.
123. Bambace, C., Dahlman, I., Arner, P., and Kulyté, A. (2013). NPC1 in human white adipose tissue and obesity. *BMC Endocr. Disord.* *13*, 5.
124. Jelinek, D., Castillo, J.J., and Garver, W.S. (2013). The C57BL/6j Niemann-Pick C1 mouse model with decreased gene dosage has impaired glucose tolerance independent of body weight. *Gene* *527*, 65–70.
125. Woś, M., Szczepanowska, J., Pikuła, S., Tylki-Szymańska, A., Zabłocki, K., and Bandorowicz-Pikuła, J. (2016). Mitochondrial dysfunction in fibroblasts derived from patients with Niemann-Pick type C disease. *Arch. Biochem. Biophys.* *593*, 50–59.
126. Bernhard, F., Landgraf, K., Klötting, N., Berthold, A., Büttner, P., Friebe, D., Kiess, W., Kovacs, P., Blüher, M., and Körner, A. (2013). Functional relevance of genes implicated by obesity genome-wide association study signals for human adipocyte biology. *Diabetologia* *56*, 311–322.
127. Buzaglo-Aziel, L., Kuperman, Y., Tsoory, M., Zaltsman, Y., Shachnai, L., Zaidman, S.L., Bassat, E., Michailovici, I., Sarver, A., Tzahor, E., et al. (2016). Loss of muscle *MTCH2* increases whole-body energy utilization and protects from diet-induced obesity. *Cell Rep.* *14*, 1602–1610.
128. Li, Q., Wang, L., Tan, W., Peng, Z., Luo, Y., Zhang, Y., Zhang, G., Na, D., Jin, P., Shi, T., et al. (2011). Identification of C1q/TNF-related protein 4 as a potential cytokine that stimulates the STAT3 and NF- $\kappa$ B pathways and promotes cell survival in human cancer cells. *Cancer Lett.* *308*, 203–214.
129. Byerly, M.S., Petersen, P.S., Ramamurthy, S., Seldin, M.M., Lei, X., Provost, E., Wei, Z., Ronnett, G.V., and Wong, G.W. (2014). C1q/TNF-related protein 4 (CTRP4) is a unique secreted protein with two tandem C1q domains that functions in the hypothalamus to modulate food intake and body weight. *J. Biol. Chem.* *289*, 4055–4069.
130. Sepe, M., Festa, L., Tolino, F., Bellucci, L., Sisto, L., Alfano, D., Ragno, P., Calabrò, V., de Franciscis, V., La Mantia, G., and Pollice, A. (2011). A regulatory mechanism involving TBP-1/Tat-Binding Protein 1 and Akt/PKB in the control of cell proliferation. *PLoS ONE* *6*, e22800.
131. Hinney, A., Albayrak, O., Antel, J., Volckmar, A.L., Sims, R., Chapman, J., Harold, D., Gerrish, A., Heid, I.M., Winkler, T.W., et al.; GERAD Consortium; IGAP Consortium; and GIANT Consortium (2014). Genetic variation at the *CELF1* (*CUGBP, elav-like family member 1 gene*) locus is genome-wide associated with Alzheimer's disease and obesity. *Am. J. Med. Genet. B. Neuropsychiatr. Genet.* *165B*, 283–293.
132. Ridler, C. (2016). Obesity: Inheritance via mitochondria. *Nat. Rev. Endocrinol.* *12*, 497.
133. Semenkovich, C.F. (2017). We know more than we can tell about diabetes and vascular disease: The 2016 Edwin Bierman Award Lecture. *Diabetes* *66*, 1735–1741.
134. Szendroedi, J., Phielix, E., and Roden, M. (2011). The role of mitochondria in insulin resistance and type 2 diabetes mellitus. *Nat. Rev. Endocrinol.* *8*, 92–103.
135. West, A.P., and Shadel, G.S. (2017). Mitochondrial DNA in innate immune responses and inflammatory pathology. *Nat. Rev. Immunol.* *17*, 363–375.
136. Francis, J.W., Turn, R.E., Newman, L.E., Schiavon, C., and Kahn, R.A. (2016). Higher order signaling: *ARL2* as regulator of both mitochondrial fusion and microtubule dynamics allows integration of 2 essential cell functions. *Small GTPases* *7*, 188–196.
137. Castellana, S., Fusilli, C., Mazzocchi, G., Biagini, T., Capocello, D., Carella, M., Vescovi, A.L., and Mazza, T. (2017). High-confidence assessment of functional impact of human mitochondrial non-synonymous genome variations by APOGEE. *PLoS Comput. Biol.* *13*, e1005628.
138. Samuels, D.C., Carothers, A.D., Horton, R., and Chinnery, P.F. (2006). The power to detect disease associations with mitochondrial DNA haplogroups. *Am. J. Hum. Genet.* *78*, 713–720.
139. Guo, Y., Lanktree, M.B., Taylor, K.C., Hakonarson, H., Lange, L.A., Keating, B.J.; and IBC 50K SNP array BMI Consortium (2013). Gene-centric meta-analyses of 108 912 individuals confirm known body mass index loci and reveal three novel signals. *Hum. Mol. Genet.* *22*, 184–201.
140. Middelberg, R.P., Ferreira, M.A., Henders, A.K., Heath, A.C., Madden, P.A., Montgomery, G.W., Martin, N.G., and Whitfield, J.B. (2011). Genetic variants in *LPL*, *OASL* and *TOMM40/APOE-C1-C2-C4* genes are associated with multiple cardiovascular-related traits. *BMC Med. Genet.* *12*, 123.
141. Kraja, A.T., Chasman, D.I., North, K.E., Reiner, A.P., Yanek, L.R., Kilpeläinen, T.O., Smith, J.A., Dehghan, A., Dupuis, J., Johnson, A.D., et al.; Cross Consortia Pleiotropy Group; Cohorts for Heart and Aging Research in Genetic Epidemiology; Genetic Investigation of Anthropometric Traits Consortium; Global Lipids Genetics Consortium; Meta-Analyses of Glucose; Insulin-related

- traits Consortium; Global BPgen Consortium; ADIPOGen Consortium; Women's Genome Health Study; and Howard University Family Study (2014). Pleiotropic genes for metabolic syndrome and inflammation. *Mol. Genet. Metab.* *112*, 317–338.
142. Pruim, R.J., Welch, R.P., Sanna, S., Teslovich, T.M., Chines, P.S., Gliedt, T.P., Boehnke, M., Abecasis, G.R., and Willer, C.J. (2010). LocusZoom: regional visualization of genome-wide association scan results. *Bioinformatics* *26*, 2336–2337.

## Supplemental Data

### Associations of Mitochondrial and Nuclear

### Mitochondrial Variants and Genes

### with Seven Metabolic Traits

Aldi T. Kraja, Chunyu Liu, Jessica L. Fetterman, Mariaelisa Graff, Christian Theil Have, Charles Gu, Lisa R. Yanek, Mary F. Feitosa, Dan E. Arking, Daniel I. Chasman, Kristin Young, Symen Ligthart, W. David Hill, Stefan Weiss, Jian'an Luan, Franco Giulianini, Ruifang Li-Gao, Fernando P. Hartwig, Shioh J. Lin, Lihua Wang, Tom G. Richardson, Jie Yao, Eliana P. Fernandez, Mohsen Ghanbari, Mary K. Wojczynski, Wen-Jane Lee, Maria Argos, Sebastian M. Armasu, Ruteja A. Barve, Kathleen A. Ryan, Ping An, Thomas J. Baranski, Suzette J. Bielinski, Donald W. Bowden, Ulrich Broeckel, Kaare Christensen, Audrey Y. Chu, Janie Corley, Simon R. Cox, Andre G. Uitterlinden, Fernando Rivadeneira, Cheryl D. Cropp, E. Warwick Daw, Diana van Heemst, Lisa de las Fuentes, He Gao, Ioanna Tzoulaki, Tarunveer S. Ahluwalia, Renée de Mutsert, Leslie S. Emery, A. Mesut Erzurumluoglu, James A. Perry, Mao Fu, Nita G. Forouhi, Zhenglong Gu, Yang Hai, Sarah E. Harris, Gibran Hemani, Steven C. Hunt, Marguerite R. Irvin, Anna E. Jonsson, Anne E. Justice, Nicola D. Kerrison, Nicholas B. Larson, Keng-Hung Lin, Latisha D. Love-Gregory, Rasika A. Mathias, Joseph H. Lee, Matthias Nauck, Raymond Noordam, Ken K. Ong, James Pankow, Amit Patki, Alison Pattie, Astrid Petersmann, Qibin Qi, Rasmus Ribel-Madsen, Rebecca Rohde, Kevin Sandow, Theresia M. Schnurr, Tamar Sofer, John M. Starr, Adele M. Taylor, Alexander Teumer, Nicholas J. Timpson, Hugoline G. de Haan, Yujie Wang, Peter E. Weeke, Christine Williams, Hongsheng Wu, Wei Yang, Donglin Zeng, Daniel R. Witte, Bruce S. Weir, Nicholas J. Wareham, Henrik Vestergaard, Stephen T. Turner, Christian Torp-Pedersen, Evie Stergiakouli, Wayne Huey-Herng Sheu, Frits R. Rosendaal, M. Arfan Ikram, Oscar H. Franco, Paul M. Ridker, Thomas T. Perls, Oluf Pedersen, Ellen A. Nohr, Anne B. Newman, Allan Linneberg, Claudia Langenberg, Tuomas O. Kilpeläinen, Sharon L.R. Kardina, Marit E. Jørgensen, Torben Jørgensen, Thorkild I.A. Sørensen, Georg Homuth, Torben Hansen, Mark O. Goodarzi, Ian J. Deary, Cramer Christensen, Yii-Der Ida Chen, Aravinda Chakravarti, Ivan Brandslund, Klaus Bonnelykke, Kent D. Taylor, James G. Wilson, Santiago Rodriguez, Gail Davies, Bernardo L. Horta, Bharat Thyagarajan, D.C. Rao, Niels Grarup, Victor G. Davila-Roman, Gavin Hudson, Xiuqing Guo, Donna K. Arnett, Caroline Hayward, Dhananjay Vaidya, Dennis O. Mook-Kanamori, Hemant K. Tiwari, Daniel Levy, Ruth J.F. Loos, Abbas Dehghan, Paul Elliott, Afshan N. Malik, Robert A. Scott, Diane M. Becker, Mariza de Andrade, Michael A. Province, James B. Meigs, Jerome I. Rotter, and Kari E. North

---

## Supplement:

### Figures, Tables, Methods, References, Acknowledgments and Study Descriptions

#### Content

##### 1. Supplementary Figures

**Figure S1.** BMI mtDNA Association Tests and QQ-plot Distribution

**Figure S2.** WHR mtDNA Association Tests and QQ-plot Distribution

**Figure S3.** Glucose mtDNA Association Tests and QQ-plot Distribution

**Figure S4.** Insulin mtDNA Association Tests and QQ-plot Distribution

**Figure S5.** HOMA-B mtDNA Association Tests and QQ-plot Distribution

**Figure S6.** HOMA-IR mtDNA Association Tests and QQ-plot Distribution

**Figure S7.** HbA1C mtDNA Association Tests and QQ-plot Distribution

**Figure S8.** HOMA-B and HOMA-IR Association Results with MT-nDNA candidate Genes

**Figure S9.** HbA1c Association Results with MT-nDNA Candidate Genes

**Figure S10.** Six Clusters of Associations Among 109 MT-nDNA candidate Genes and Biological Terms Using Literature Lab

**Figure S11.** A Diagram on MT-nDNA Candidate Genes Commonalities and Functions Summary. Details are presented in Table 4 and Table S6 and Discussion

**Figure S12.1.** Detecting trans-Regulatory Variants by Combining GWAS *P*-value and Probable Functional Variants that Affect Transcriptional Regulation

**Figure S12.2.** Detecting trans-Regulatory Variants by Combining GWAS *P*-value and Probable Functional Variants that Affect Transcriptional Regulation

**Figure S12.3.** Detecting trans-Regulatory Variants by Combining GWAS *P*-value and Probable Functional Variants that Affect Transcriptional Regulation

**Figure S13.** RNA Expression Patterns for Selected mtDNA Genes in Different Human Tissues

**Figure S14.** *G6PD* Interactions. *G6PD* (chrX:154,531,390-154,547,586, right-picture) trans-regulates *MECP2* (chrX:154,021,573-154,137,103, left picture) and *MECP2* interacts with *SIN3A* (STRING protein-protein interaction evidence), which together (*SIN3A* and *MECP2*) contribute to transcription repression of other genes (depicted from QIAGEN team, middle picture)

**Figure S15.** Selection of 25<sup>th</sup> Upper Quartile LPF of Genes Associated with the Terms “Mitochondrial diseases” and “Pathway analysis”

**Figure S16.** Forest plot of beta coefficients and their 95% confidence intervals for studies contributing to seven significant mtDNA variants

**Figure S17.** Forest plot of beta coefficients and their 95% confidence intervals for studies contributing to MT-ND3-Gene based meta-analysis

##### 2. Supplementary Tables

**Table S1.** Summary Statistics for 7 Phenotypes Studied by Cohort

**Table S2.**(a, b) Details by Cohort of\_mtDNA Variants Associated with BMI, WHR, Glucose, Insulin, HOMA-B, HOMA-IR and HbA1c METAL Meta-Analysis **Single Variant** Results

**Table S3.** Association Results at Cohort Level for SOL-HA

---

**Table S4.** GWAS Publications Summary Results Used for Identifying Significant MT-nDNA Candidate Genes

**Table S5.** Domain Terms (in Pathways and Metabolism-MeSH) Enriched for MT-nDNA gene Clusters and their Assigned Abstracts in Percent

**Table S6.** Functional Annotation of 109 MT-nDNA candidate Genes  
(**Separate Excel Worksheet**)

**Table S7.** Thirteen and Fifteen Genes out of 109 MT-nDNA Candidates Associated Respectively with T2D and CVD

**Table S8.** Several Variants of MT-nDNA Candidates Are eSNV, Affecting Expression of Some of Their Corresponding Genes or Other cis-Located Genes

**Table S9.** Transcription Regulation Evidence on 588 SNVs of 109 MT-nDNA Genes Using RegulomeDB and HaploReg  
(**Separate Excel Worksheet**)

**Table S10.** Transcription Regulation of MT-nDNA Candidate Variants Using GTEx Software  
(**Separate Excel worksheet**)

**Table S11.** Fifteen Genes out of 109 MT-nDNA Candidates Ranked with Highest PageRank Score for PPI

**Table S12.** A Comparison of 109 MT-nDNA Candidate Genes Detected with  $P < 1E-06$ , and Additional SNVs for the Same Genes from GWAS-Catalog Conditional They Pass  $P \leq 5E-08$   
(**Separate Excel Worksheet**)

**Table S13.** A Comparison of mtDNA Association Results of Three Papers with Our Overlapping Results for Different Traits  
(**Separate Excel Worksheet**)

**Table S14.** Summary of Chips Used for Studying mtDNA Variants per Cohort and Summary Statistics for Imputation

**Table S15.** Illumina Infinium Omni Express Exome v1.1

**Table S16.** Infinium Core Exome v1.0

**Table S17.** Infinium Core Exome v1.1

**Table S18.** Infinium Human Exome v1.2

**Table S19.** Illumina HumanExome-12v1-1

**Table S20.** Illumina Human 1M Duo v3

**Table S21.** Human Omni2.5-8v1

**Table S22.** Illumina Human660W-Quad\_v1

**Table S23.** Affymetrix 6.0

**Table S24.** Illumina HumanHap550v3.0

**Table S25.** Illumina CardioMetaboChip

**Table S26.** Illumina Human 610 Quad v1

**Table S27.** Affymetrix Axiom UKBiobank

**Table S28.** Illumina Human1Mv1C

**Table S29.** MT-MeSH Terms Extracted from Literature Lab

**Table S30.** Selected 2,282 Candidate Genes (MT-nDNA) that May Contribute to Mitochondria  
(**Separate Excel Worksheet**)

**Table S31.** Final list of genes (HUGO approved names) as mtDNA- and possible MT-genes candidates for contributing to mitochondria and corresponding MIM number and location.  
(**Separate Excel Worksheet**)

**Table S32.** Predicted Functional Effects of mtDNA Non-Synonymous Mutations Present in Our Arrays.  
(**Separate DOCX Table**)

---

### 3. **Supplementary Methods**

1. Phenotype Preparation
2. Mitochondrial Single Nucleotide Variant Annotation
3. mtDNA Genotyping and Imputation QC
4. mtDNA Variants Association Tests (Single variant linear regression and gene based SKAT tests)
5. mtDNA Meta-Analyses (single-variant and gene-based)
6. mtDNA Genomic Associations
7. MT-nDNA Candidate Genes
8. Enrichment Analysis of MT-nDNA Candidate Genes
9. Biological Functional Annotations

### 4. **References**

### 5. **CHARGEmtDNA+ Study Acknowledgments**

### 6. **CHARGEmtDNA+ Working Group Study Descriptions**

## 1. Supplementary Figures

**Figure S1.** BMI mtDNA Association Tests and QQ-plot Distribution

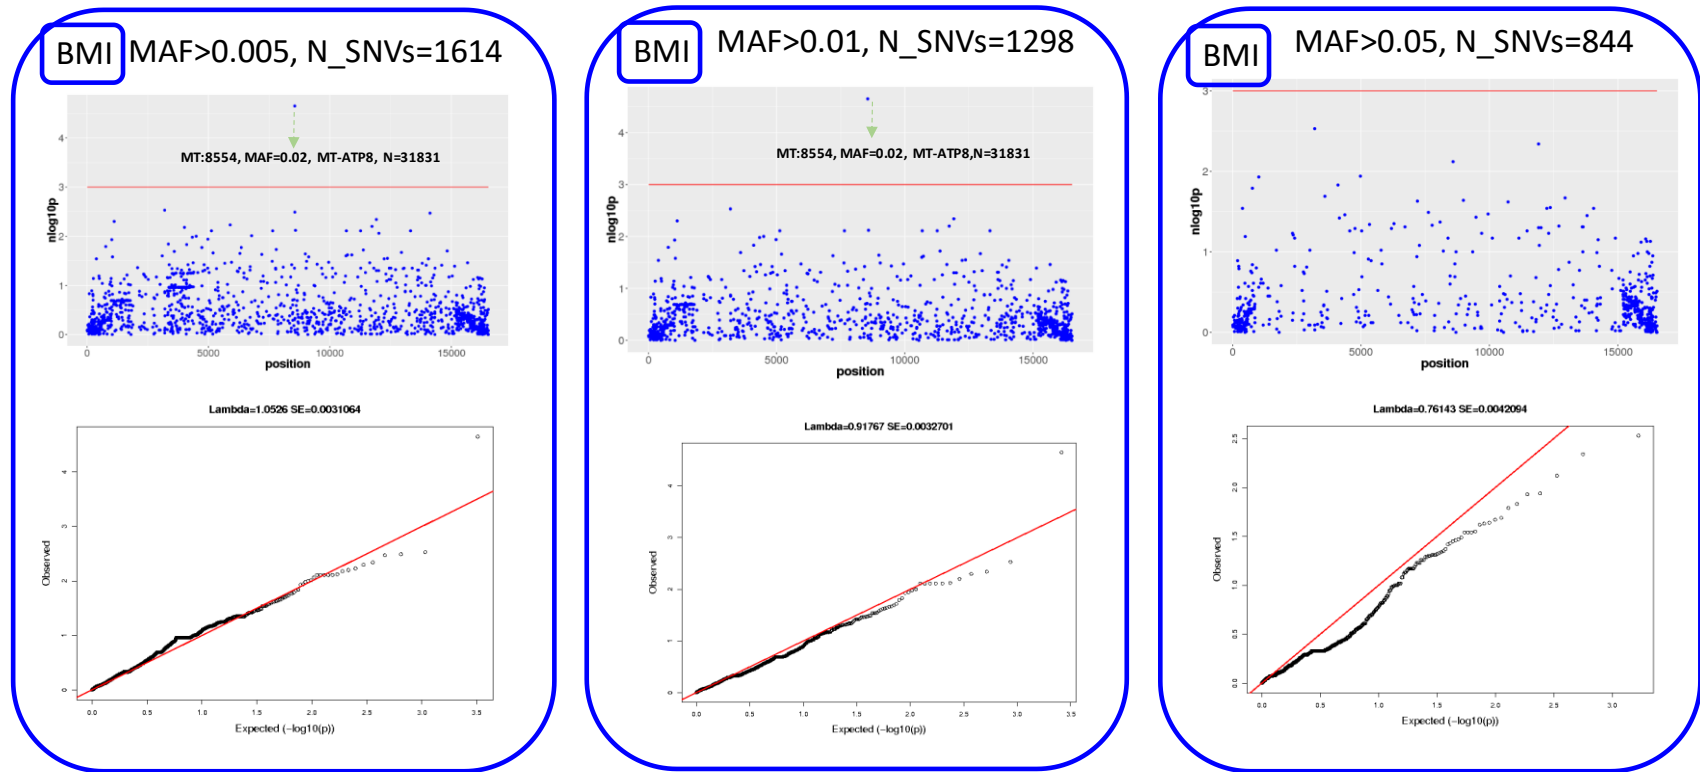



**Figure S2.** WHR mtDNA Association Tests and QQ-plot Distribution

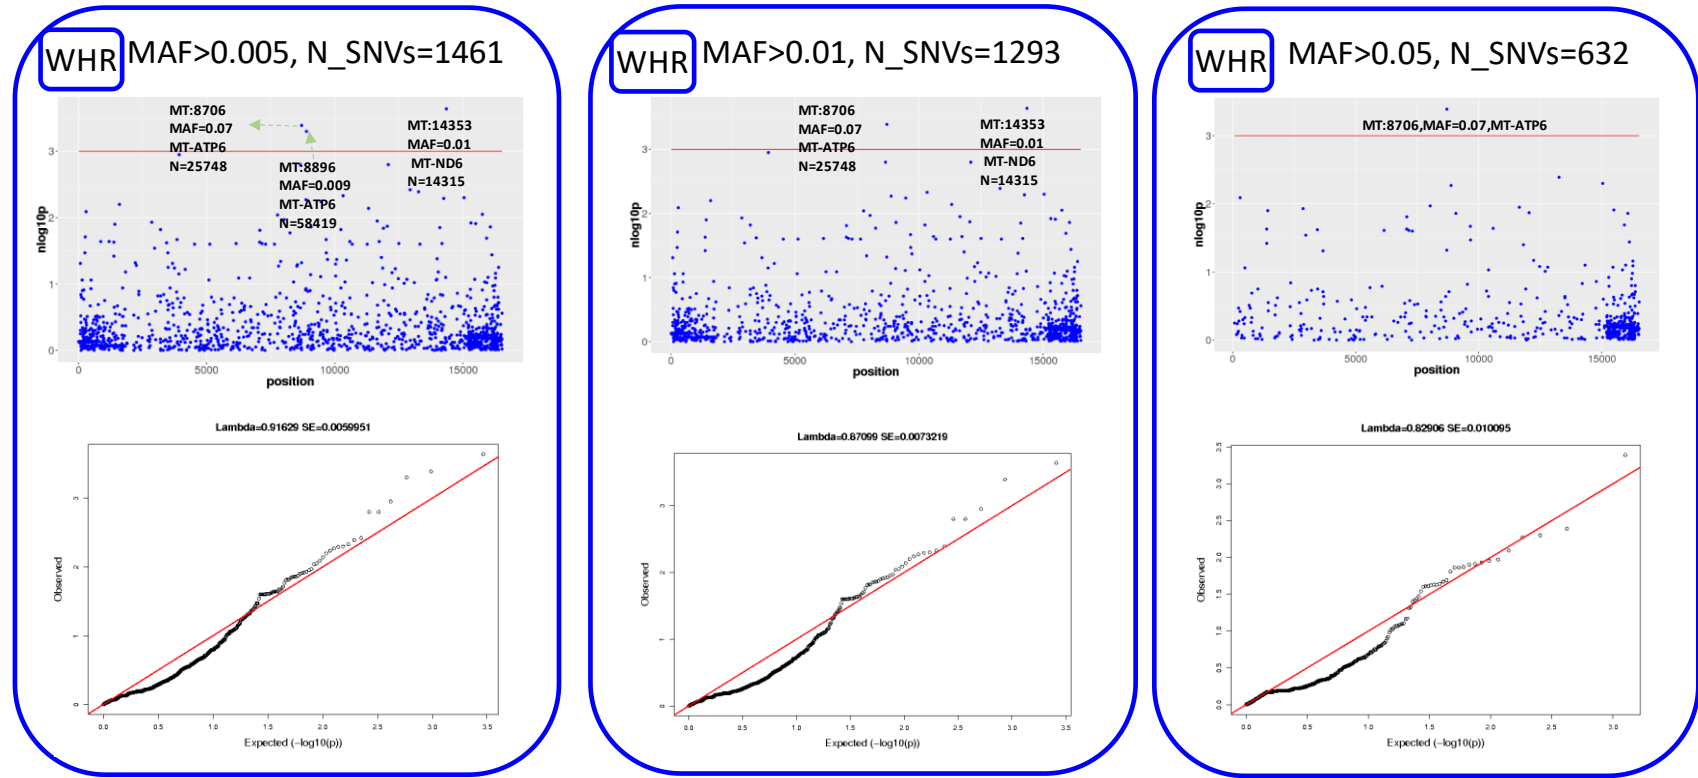

**Figure S3.** Glucose mtDNA Association Tests and QQ-plot Distribution

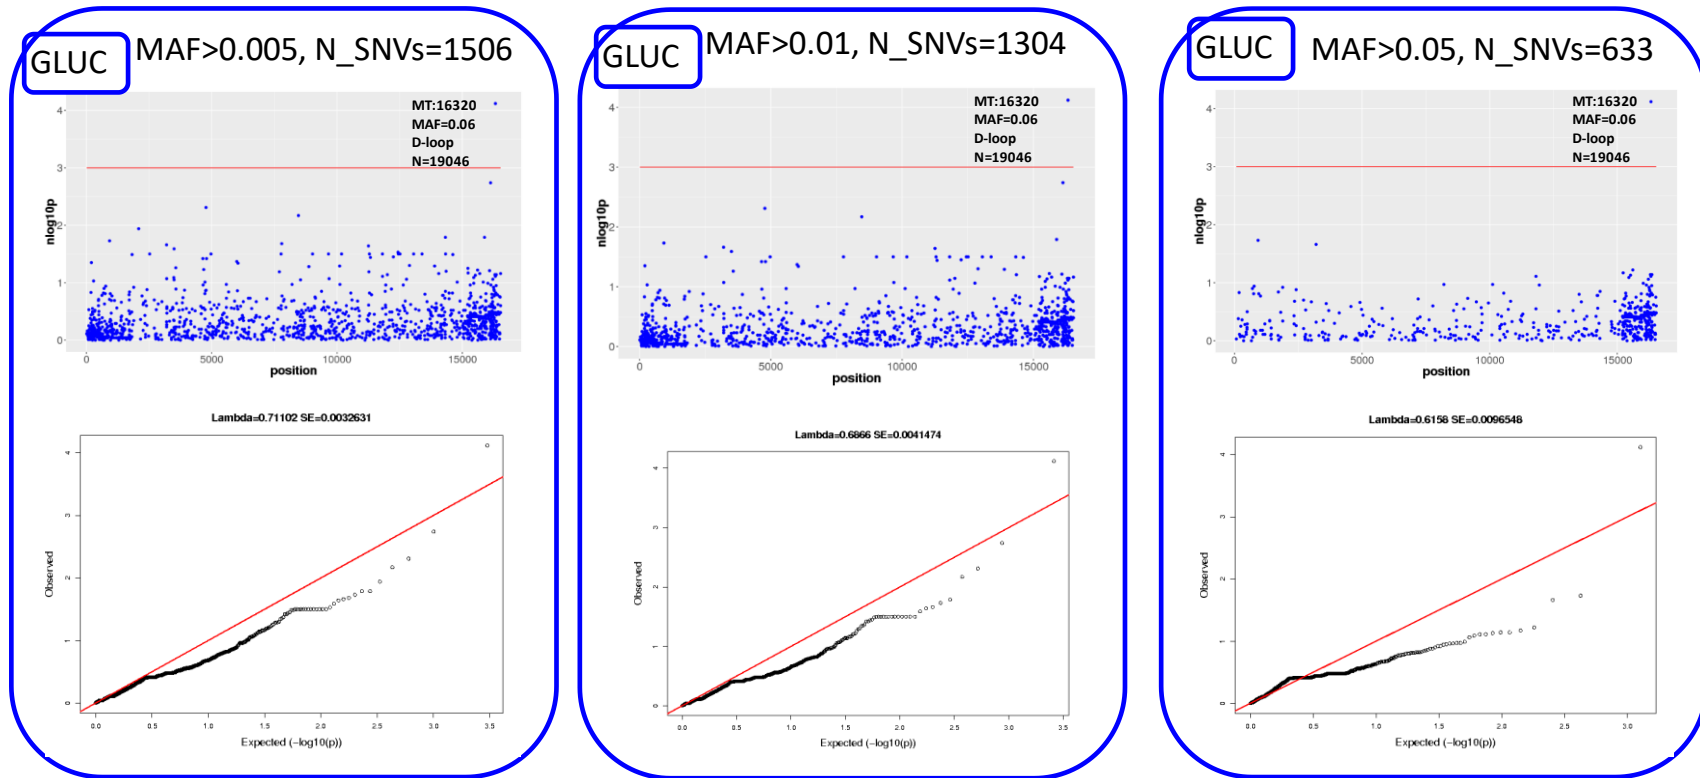

**Figure S4. Insulin mtDNA Association Tests and QQ-plot Distribution**

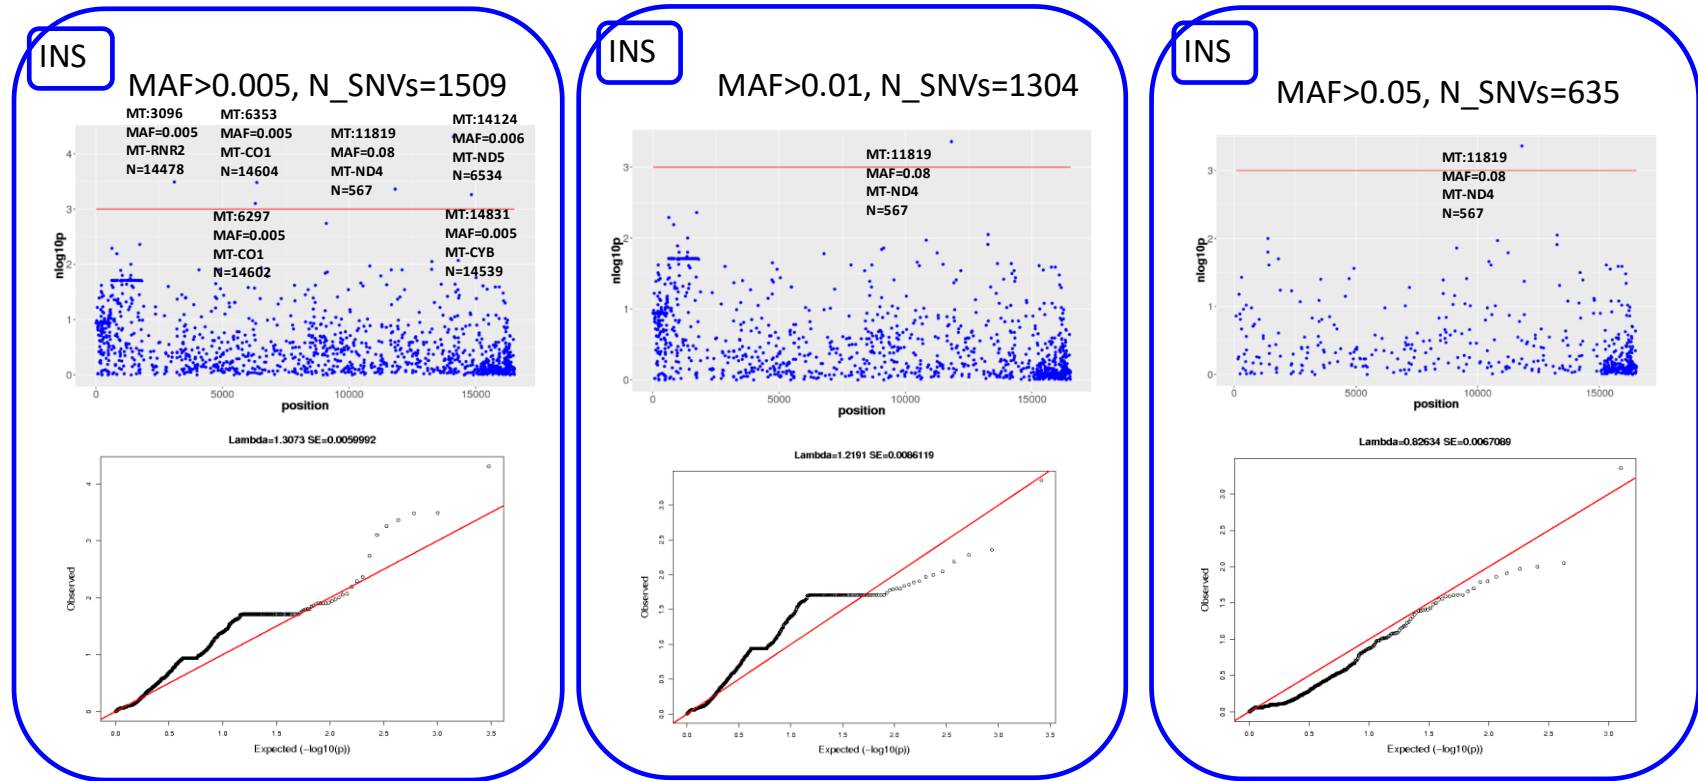

**Figure S5.** HOMA-B mtDNA Association Tests and QQ-plot Distribution

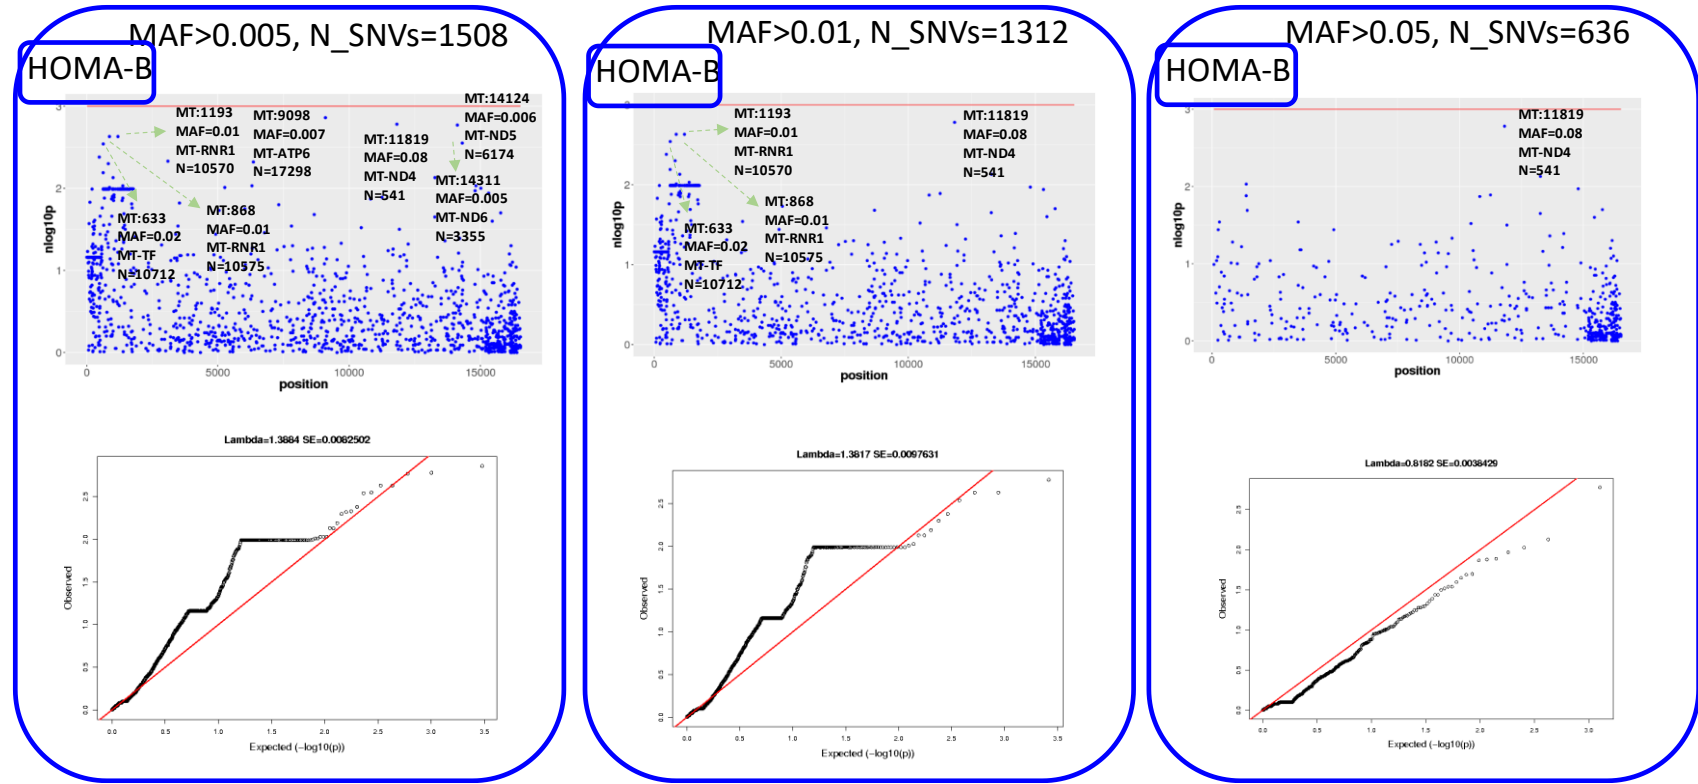

Figure S6. HOMA-IR mtDNA Association Tests and QQ-plot Distribution

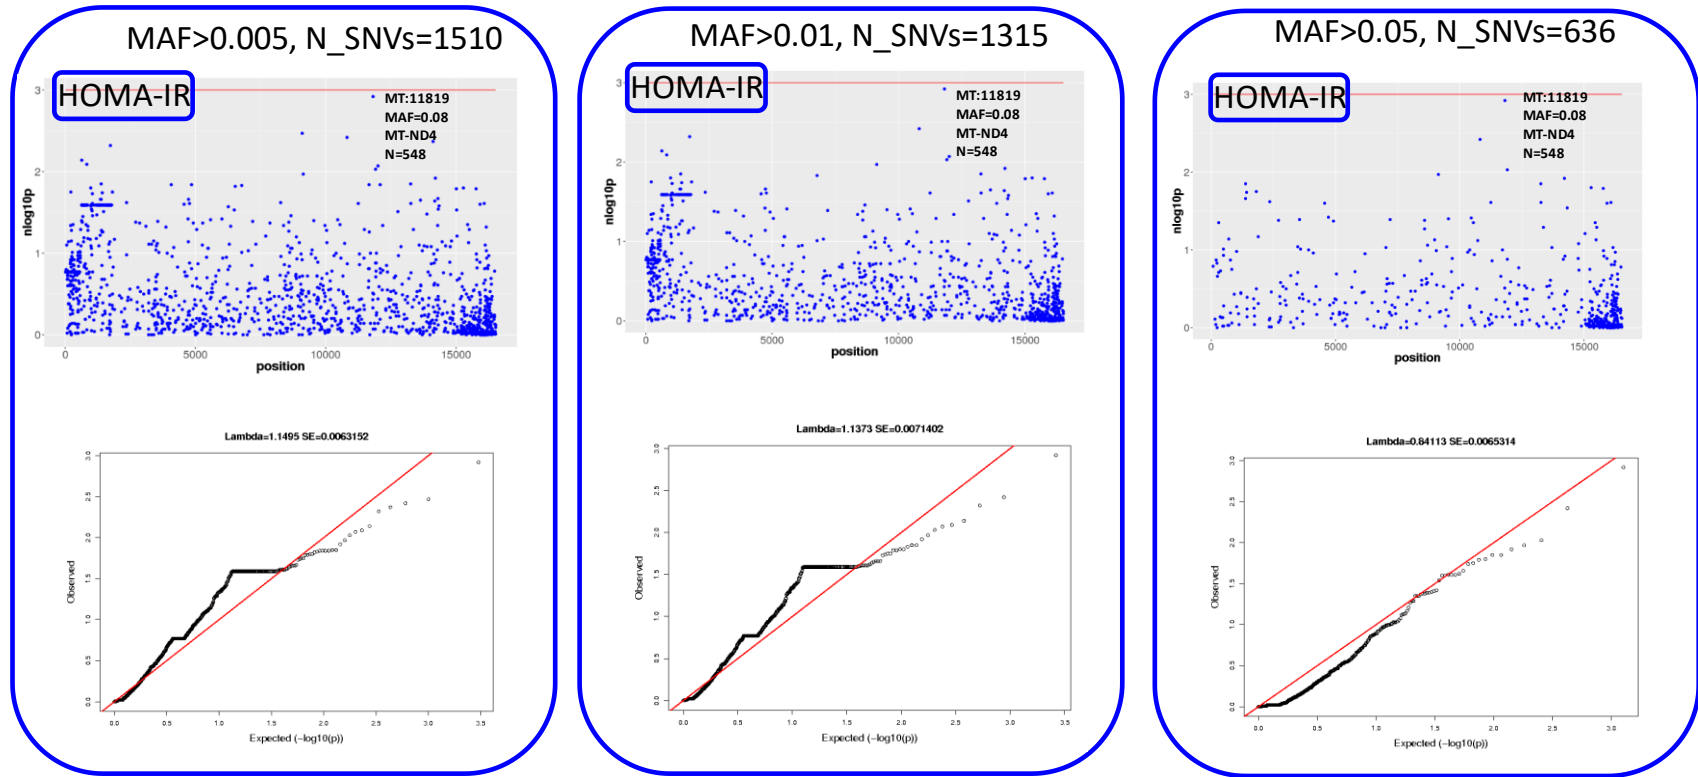

**Figure S7.** HbA1c mtDNA Association Tests and QQ-plot Distribution

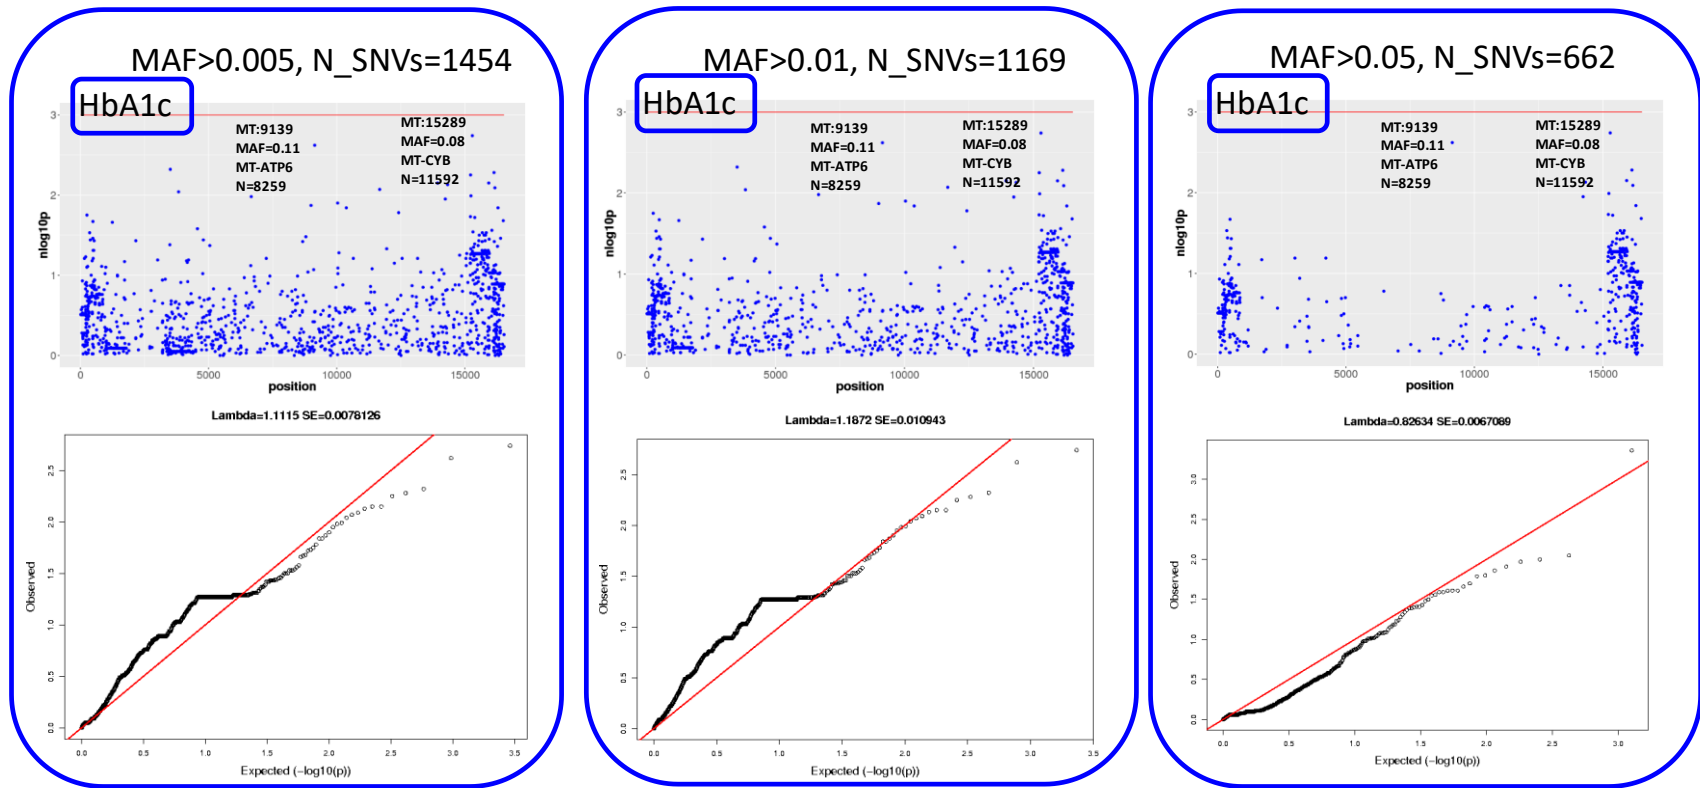

**Figure S8.** HOMA-B and HOMA-IR Association Results for MT-nDNA Candidate Genes

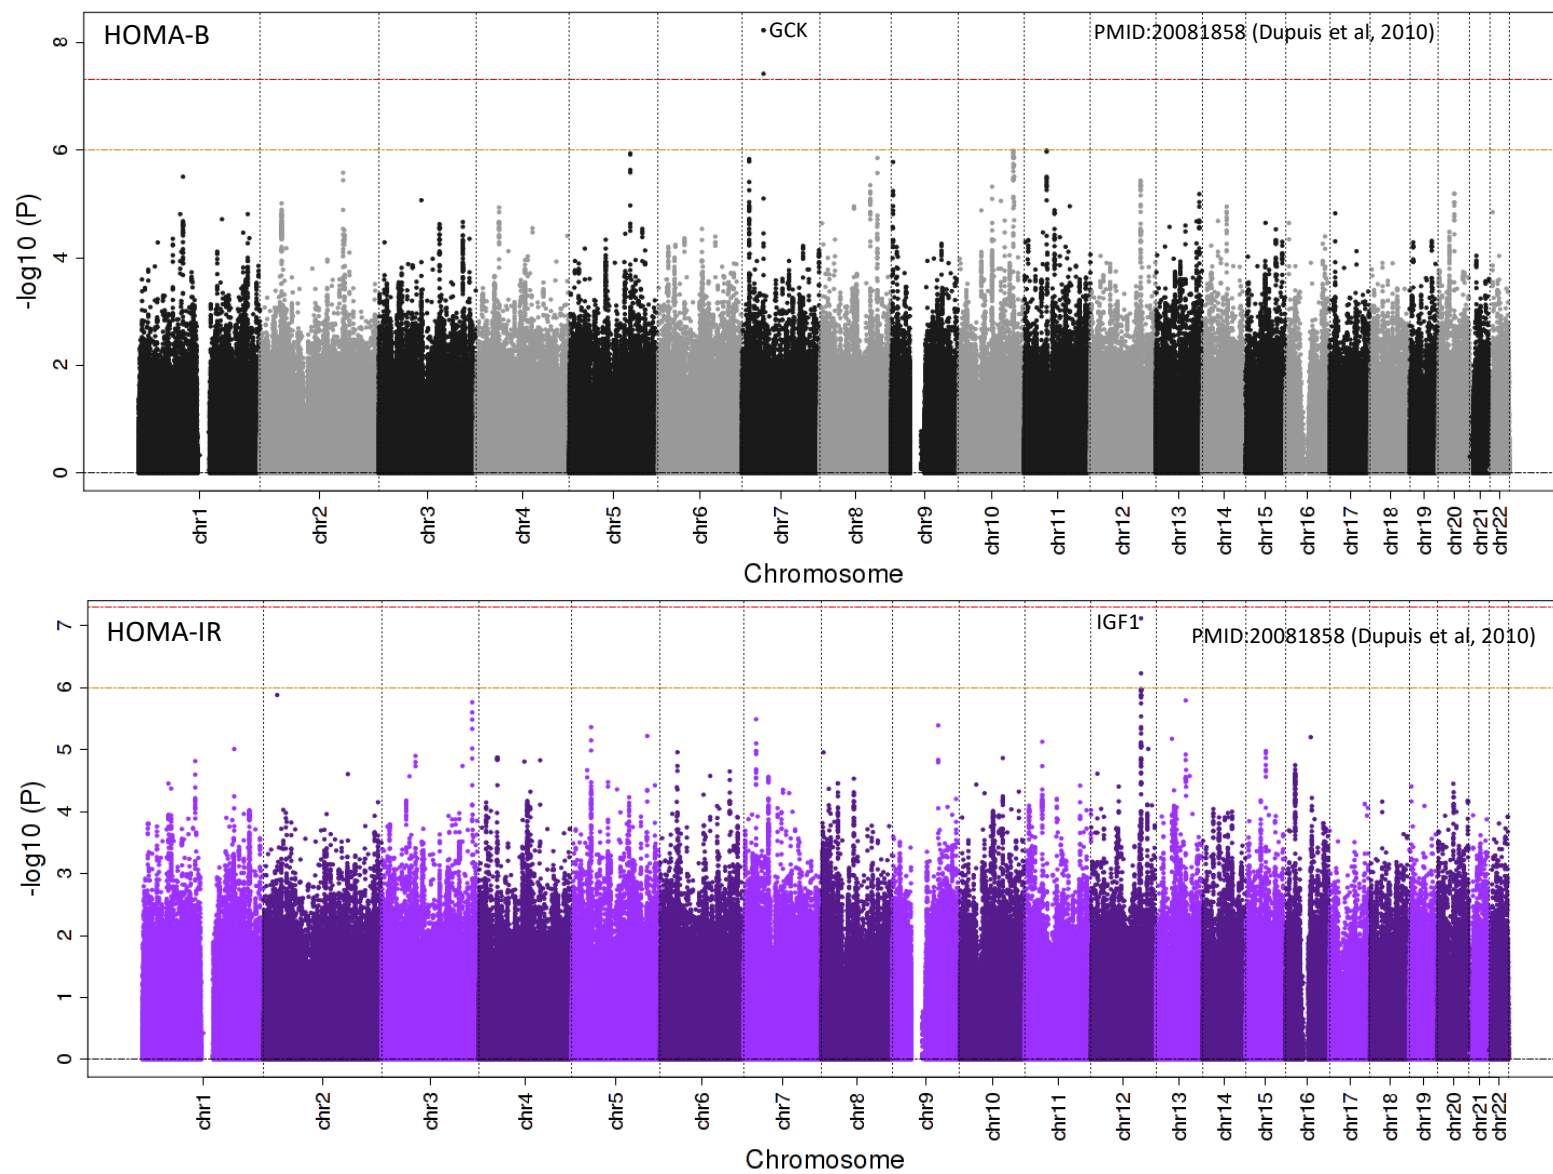

**Figure 9.** HbA1c Association Results with MT-nDNA Candidate Genes

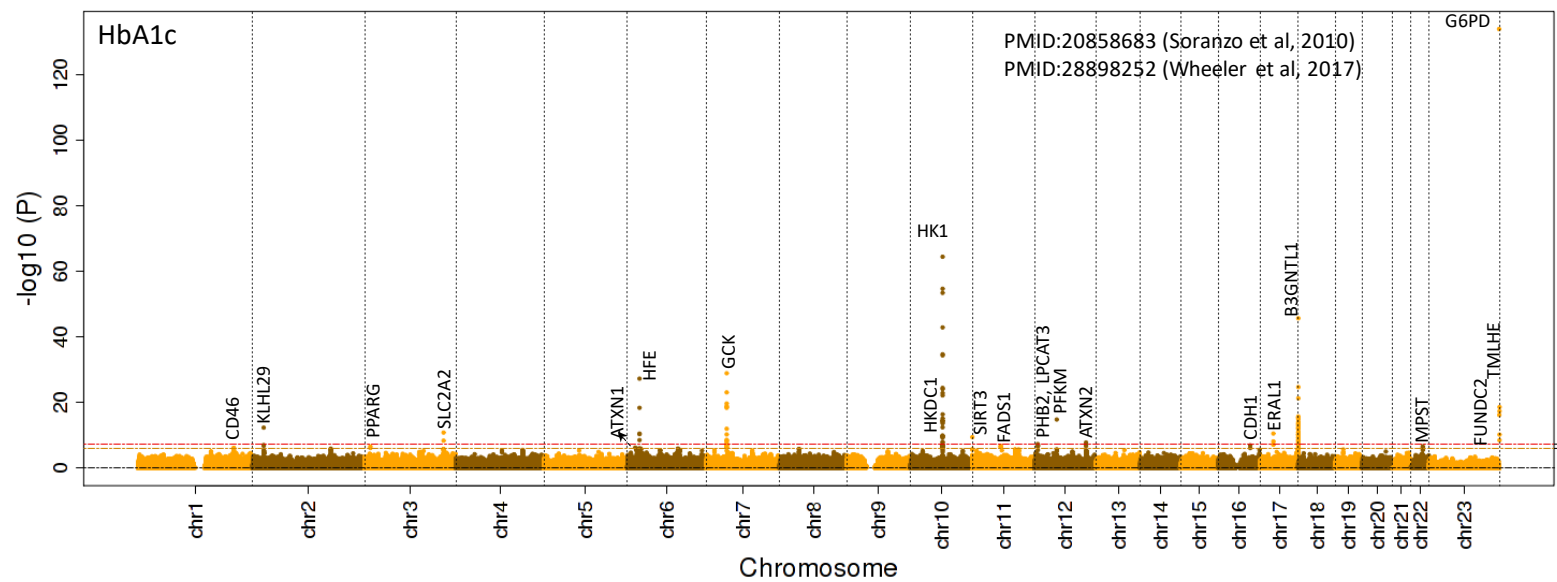



**Figure S10.** Six Clusters of Associations Among 109 MT-nDNA candidate Genes and Biological Terms Using Literature Lab.

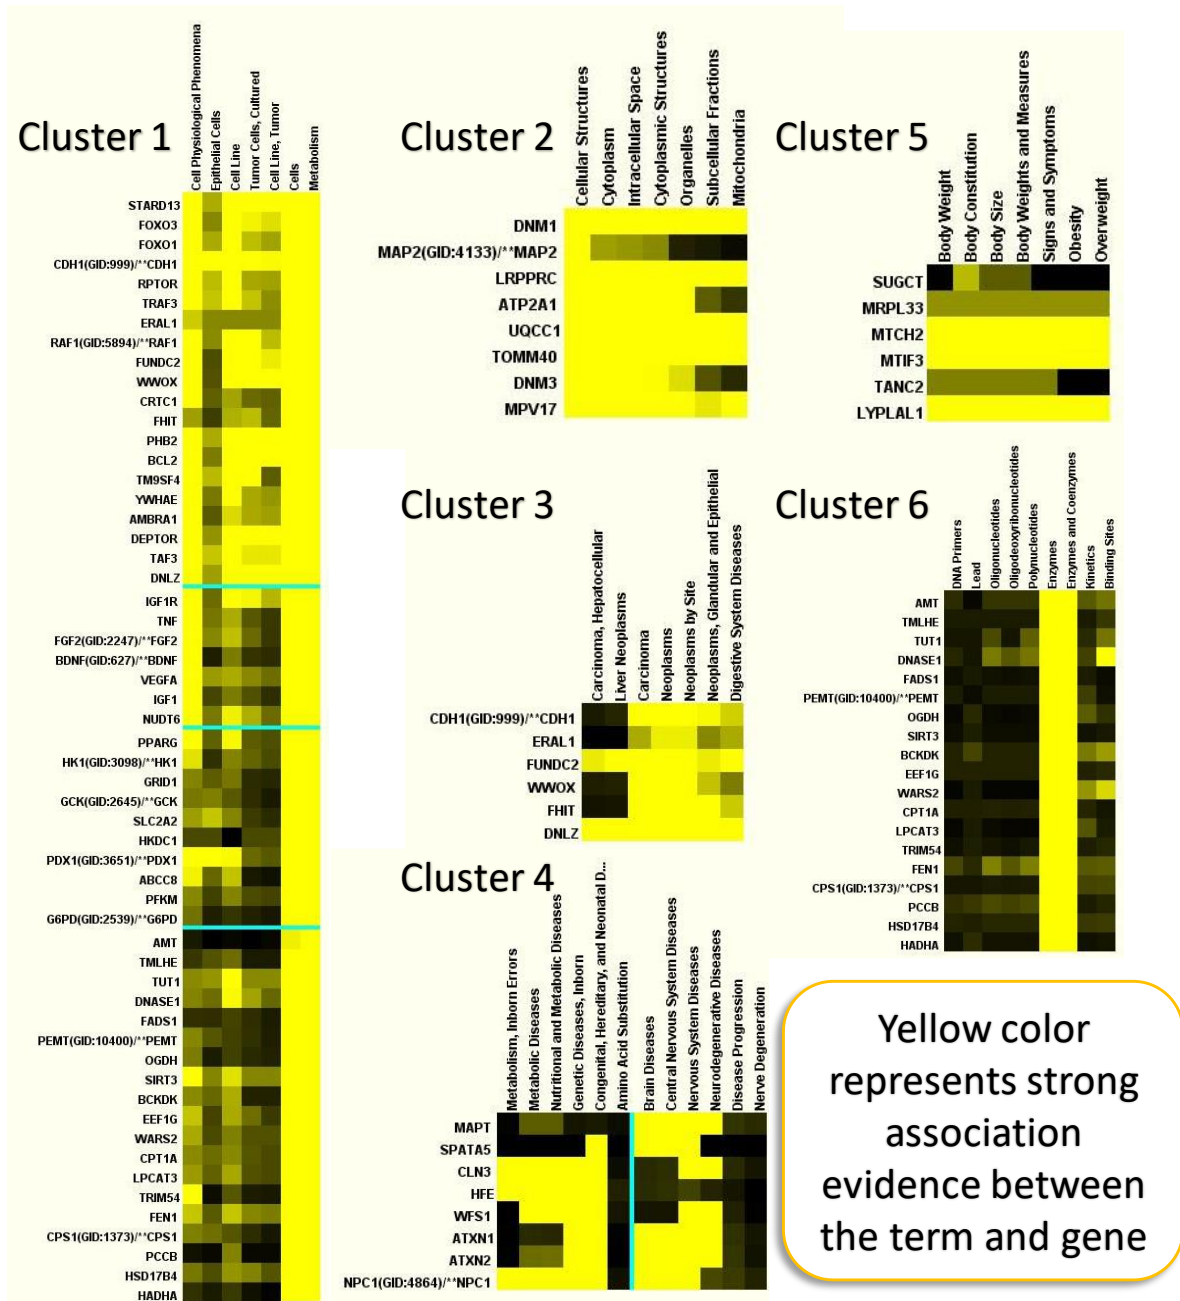

**Figure S11.** A Diagram on MT-nDNA Candidate Genes Commonalities and Functions Summary. Details are presented in Table 4 and Table S6 and Discussion.

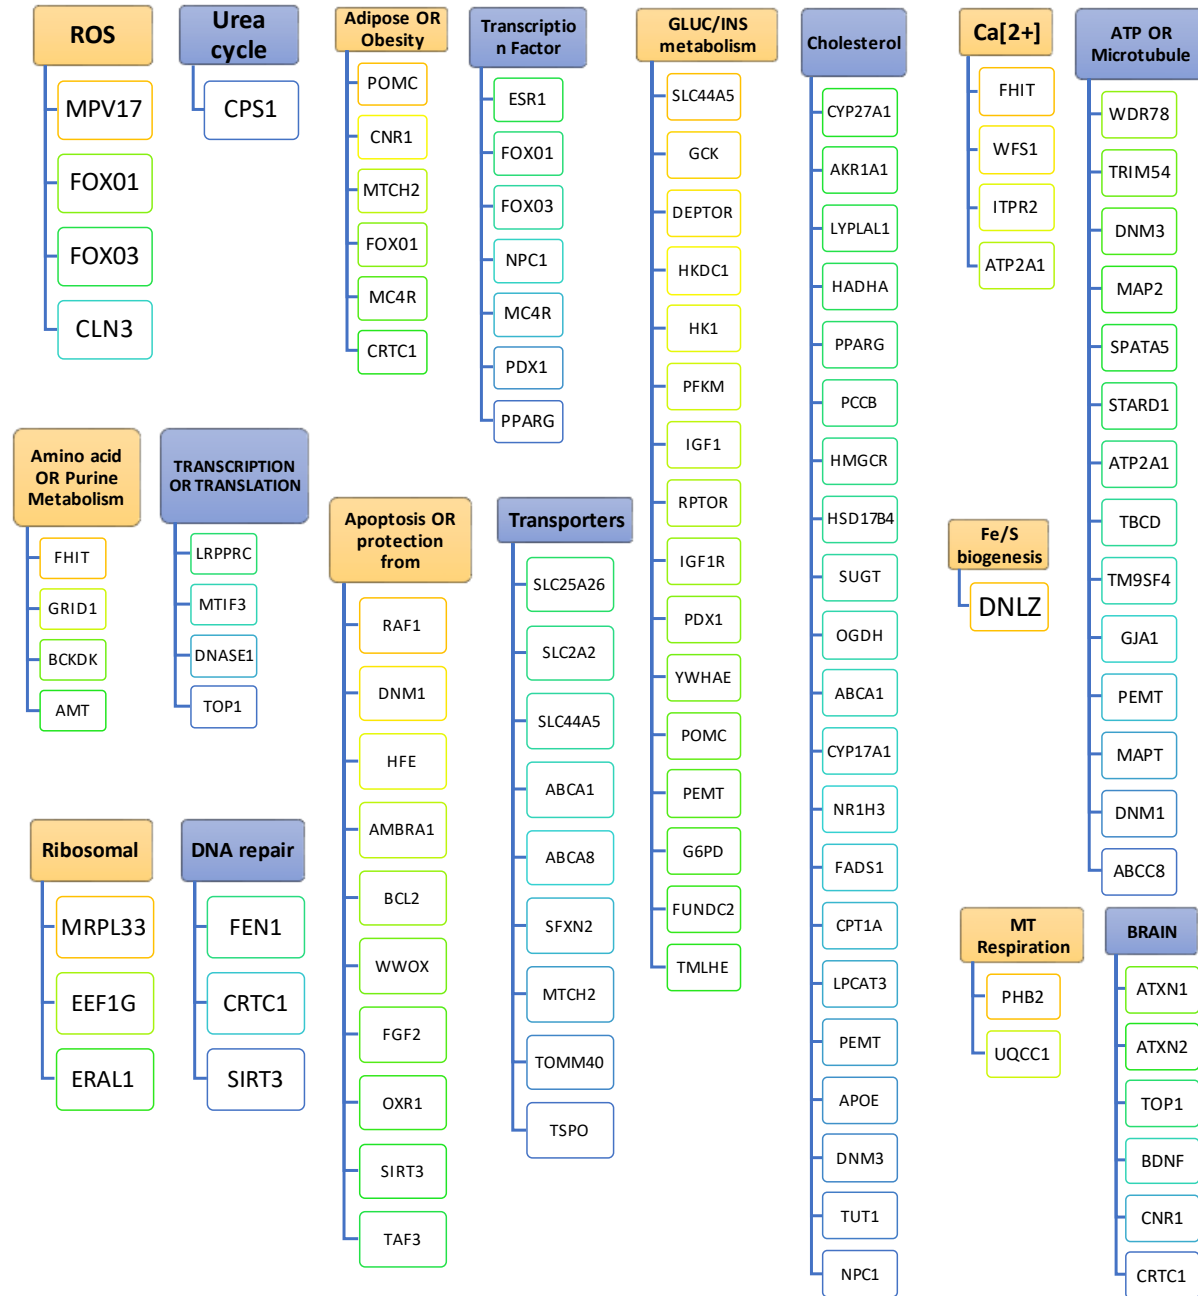



**Figure S12.2.** Detecting trans-Regulatory Variants by Combining GWAS *P*-value and Probable Functional Variants that Affect Transcriptional Regulation

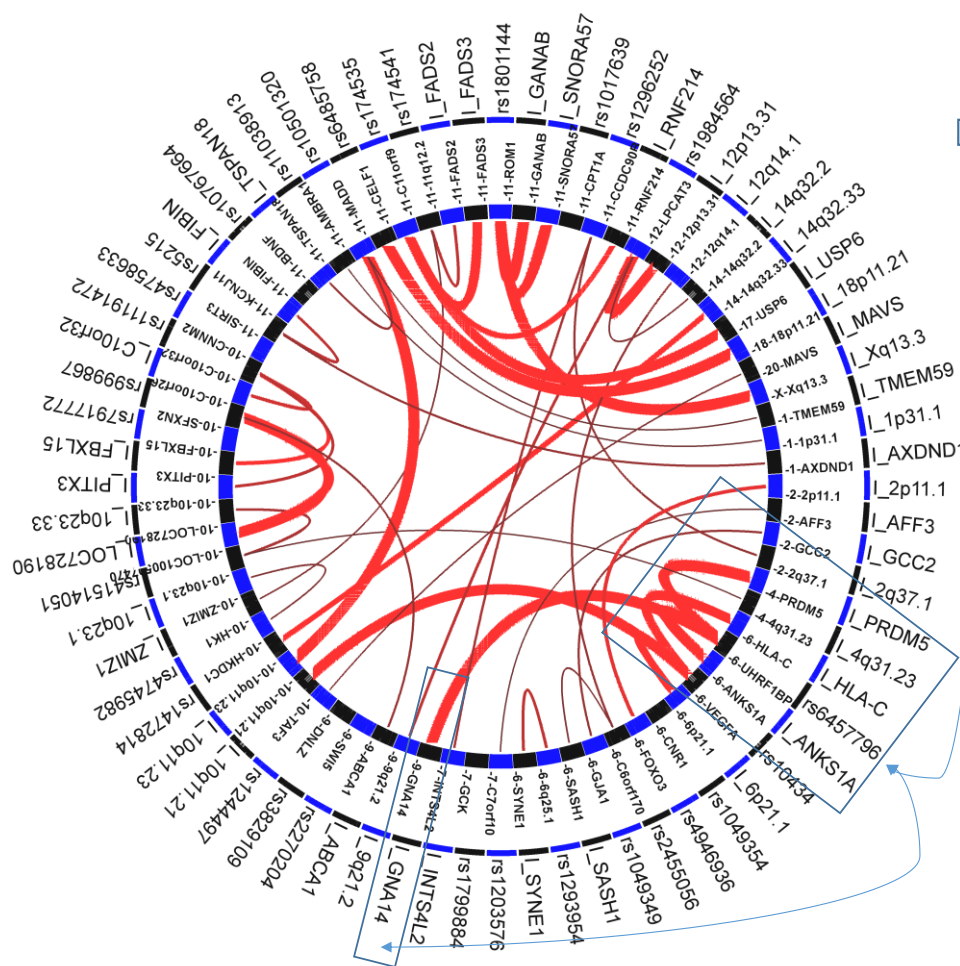

| No | CHRPOS       | SNPID      | GENOTYPE | LOCUS        | FINALP  | LeadSNP    | LEADSNP_P | RSQUARE |
|----|--------------|------------|----------|--------------|---------|------------|-----------|---------|
| 1  | 6:34828553   | rs6457796  | T C      | UHRF1BP1     | 1.0E-11 | rs6457796  | 1.2E-09   | 1       |
| 2  | 6:43753212   | rs10434    | A G      | VEGFA        | 1.4E-08 | rs10434    | 8.8E-07   | 1       |
| 3  | 6:88853451   | rs1049354  | A G      | CNR1         | 3.2E-08 | rs1049354  | 9.6E-07   | 1       |
| 4  | 6:109003321  | rs4946936  | T C      | FOXO3        | 1.8E-10 | rs9400239  | 1.6E-08   | 0.908   |
| 5  | 6:121482620  | rs2455056  | T A      | C6orf170     | 1.5E-14 | rs1273733  | 4.0E-12   | 1       |
| 6  | 6:121770642  | rs1049349  | A T      | GJA1         | 2.9E-17 | rs1049349  | 4.2E-15   | 1       |
| 7  | 6:151990961  | rs1293954  | A G      | 6q25.1       | 4.5E-09 | rs1293954  | 4.4E-09   | 1       |
| 8  | 7:40847832   | rs1203576  | A T      | C7orf10      | 8.6E-11 | rs1203576  | 1.5E-10   | 1       |
| 9  | 7:44229068   | rs1799884  | C T      | GCK          | 1.2E-90 | rs2908289  | 3.3E-88   | 1       |
| 10 | 7:44744813   | rs1088867  | A G      | OGDH         | 2.1E-07 | rs1088867  | 7.9E-08   | 1       |
| 11 | 8:107511933  | rs16892421 | T G      | OXR1         | 1.5E-06 | rs16892421 | 6.9E-07   | 1       |
| 12 | 8:121042452  | rs7835803  | A G      | DEPTOR       | 8.0E-07 | rs7835803  | 5.0E-07   | 1       |
| 13 | 9:107672365  | rs2777795  | G A      | ABCA1        | 9.3E-08 | rs2777795  | 3.1E-08   | 1       |
| 14 | 9:131042734  | rs2270204  | T G      | SWI5         | 3.8E-08 | rs7023913  | 7.3E-07   | 1       |
| 15 | 9:139256766  | rs3829109  | G A      | DNLZ         | 4.6E-10 | rs3829109  | 1.1E-10   | 1       |
| 16 | 10:7879982   | rs1244497  | A G      | TAF3         | 2.9E-12 | rs1244497  | 1.8E-11   | 1       |
| 17 | 10:71003612  | rs1472814  | A G      | HKDC1        | 4.3E-15 | rs5030913  | 3.6E-13   | 0.955   |
| 18 | 10:71089843  | rs4745982  | T G      | HK1          | 4.5E-63 | rs4745982  | 2.9E-65   | 1       |
| 19 | 10:87359055  | rs41514051 | A G      | LOC100507470 | 2.0E-10 | rs7899106  | 3.0E-08   | 0.824   |
| 20 | 10:104487443 | rs7917772  | G A      | SFXN2        | 3.8E-09 | rs7917772  | 1.5E-09   | 1       |
| 21 | 10:104504564 | rs999867   | C T      | C10orf26     | 1.7E-08 | rs1004467  | 1.2E-07   | 0.866   |
| 22 | 10:104707016 | rs11191472 | A T      | CNNM2        | 3.7E-11 | rs3740390  | 4.8E-08   | 1       |
| 23 | 11:219538    | rs4758633  | A G      | SIRT3        | 2.4E-10 | rs4758633  | 3.4E-10   | 1       |
| 24 | 11:17408630  | rs5215     | C T      | KCNJ11       | 5.9E-09 | rs757110   | 4.2E-07   | 0.921   |
| 25 | 11:27725986  | rs10767664 | T A      | BDNF         | 1.1E-16 | rs10767664 | 5.5E-13   | 1       |
| 26 | 11:46559730  | rs11038913 | T C      | AMBRA1       | 9.8E-20 | rs11038913 | 4.9E-18   | 1       |
| 27 | 11:47293799  | rs10501320 | G C      | MADD         | 5.5E-47 | rs11039149 | 4.1E-45   | 0.908   |
| 28 | 11:47530024  | rs6485758  | G A      | CELFI1       | 8.2E-31 | rs7118178  | 2.2E-29   | 0.865   |
| 29 | 11:61551356  | rs174535   | T C      | C11orf9      | 1.1E-20 | rs174556   | 7.8E-18   | 0.808   |
| 30 | 11:61565908  | rs174541   | T C      | 11q12.2      | 1.1E-10 | rs4246215  | 4.5E-11   | 1       |
| 31 | 11:62381808  | rs1801144  | G C      | ROM1         | 1.3E-12 | rs7943191  | 4.4E-08   | 0.916   |
| 32 | 11:68598534  | rs1017639  | A C      | CPT1A        | 1.9E-10 | rs1017639  | 5.0E-10   | 1       |
| 33 | 11:82984311  | rs1296252  | G T      | CCDC90B      | 6.1E-08 | rs1296252  | 7.6E-08   | 1       |
| 34 | 12:7090193   | rs1984564  | A G      | LPAT3        | 3.0E-11 | rs2110073  | 4.4E-08   | 1       |



**Figure S13.** RNA Expression Patterns for Selected mtDNA Genes in Different Human Tissues.

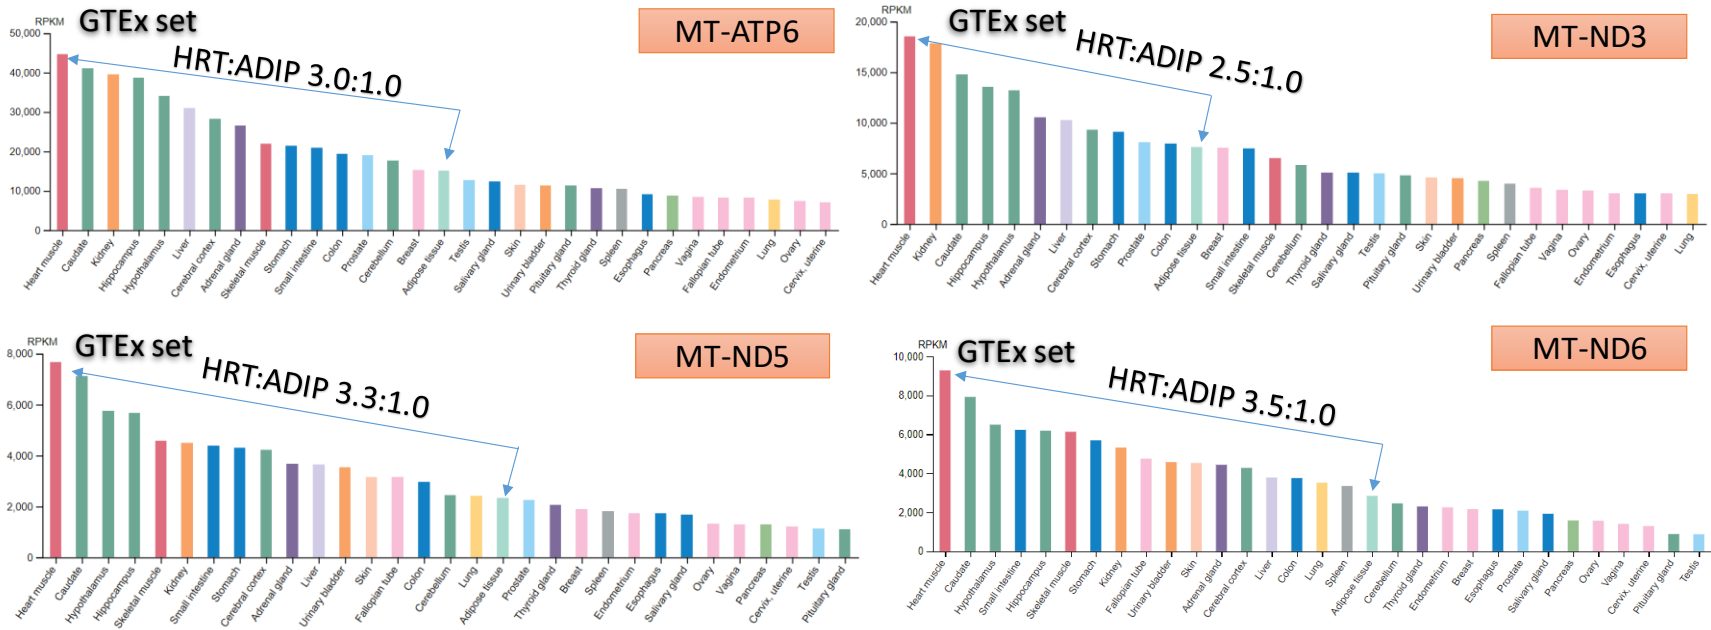

Footnotes: The RNAseq of GTEx is reported as median RPKM (reads per kilobase per million mapped reads) with varying N: 412 for heart muscle to 577 individuals for adipose tissue. The ratio of RNA expression between heart (HRT) and adipose (ADIP) for each gene reflects the trend of more- versus less energy demanding tissues (using tools of Human Protein Atlas ([www.proteinatlas.org](http://www.proteinatlas.org))).

**Figure S14.** *G6PD* interactions. *G6PD* (chrX:154,531,390-154,547,586, right-picture) trans-regulates *MECP2* (chrX:154,021,573-154,137,103, left picture) and *MECP2* interacts with *SIN3A* (protein-protein interaction evidence), which together (*SIN3A* and *MECP2*) contribute to transcription repression of other genes (middle picture)

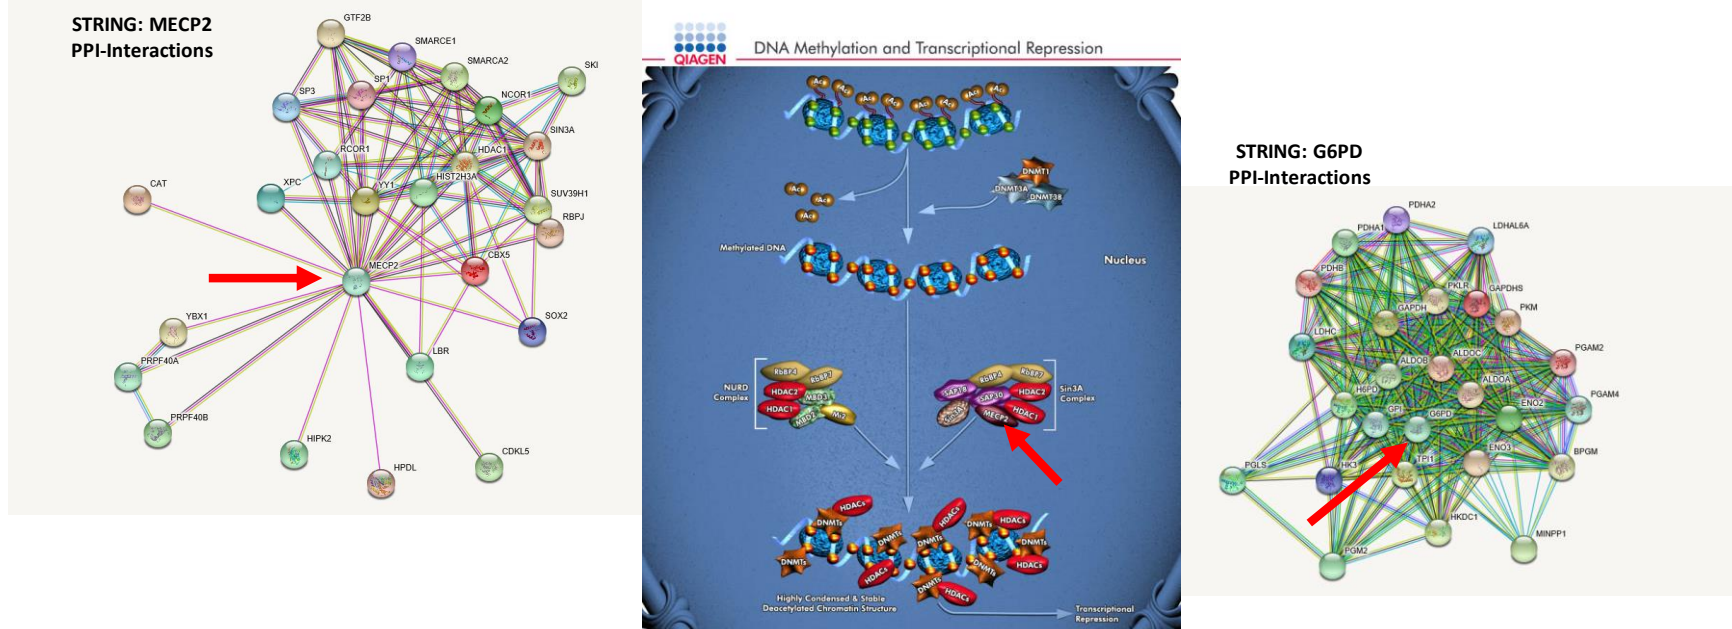

**Figure S15.** Selection of 25<sup>th</sup> Upper Quartile LPF of Genes Associated with the Terms “Mitochondrial diseases” and “Pathway analysis”.

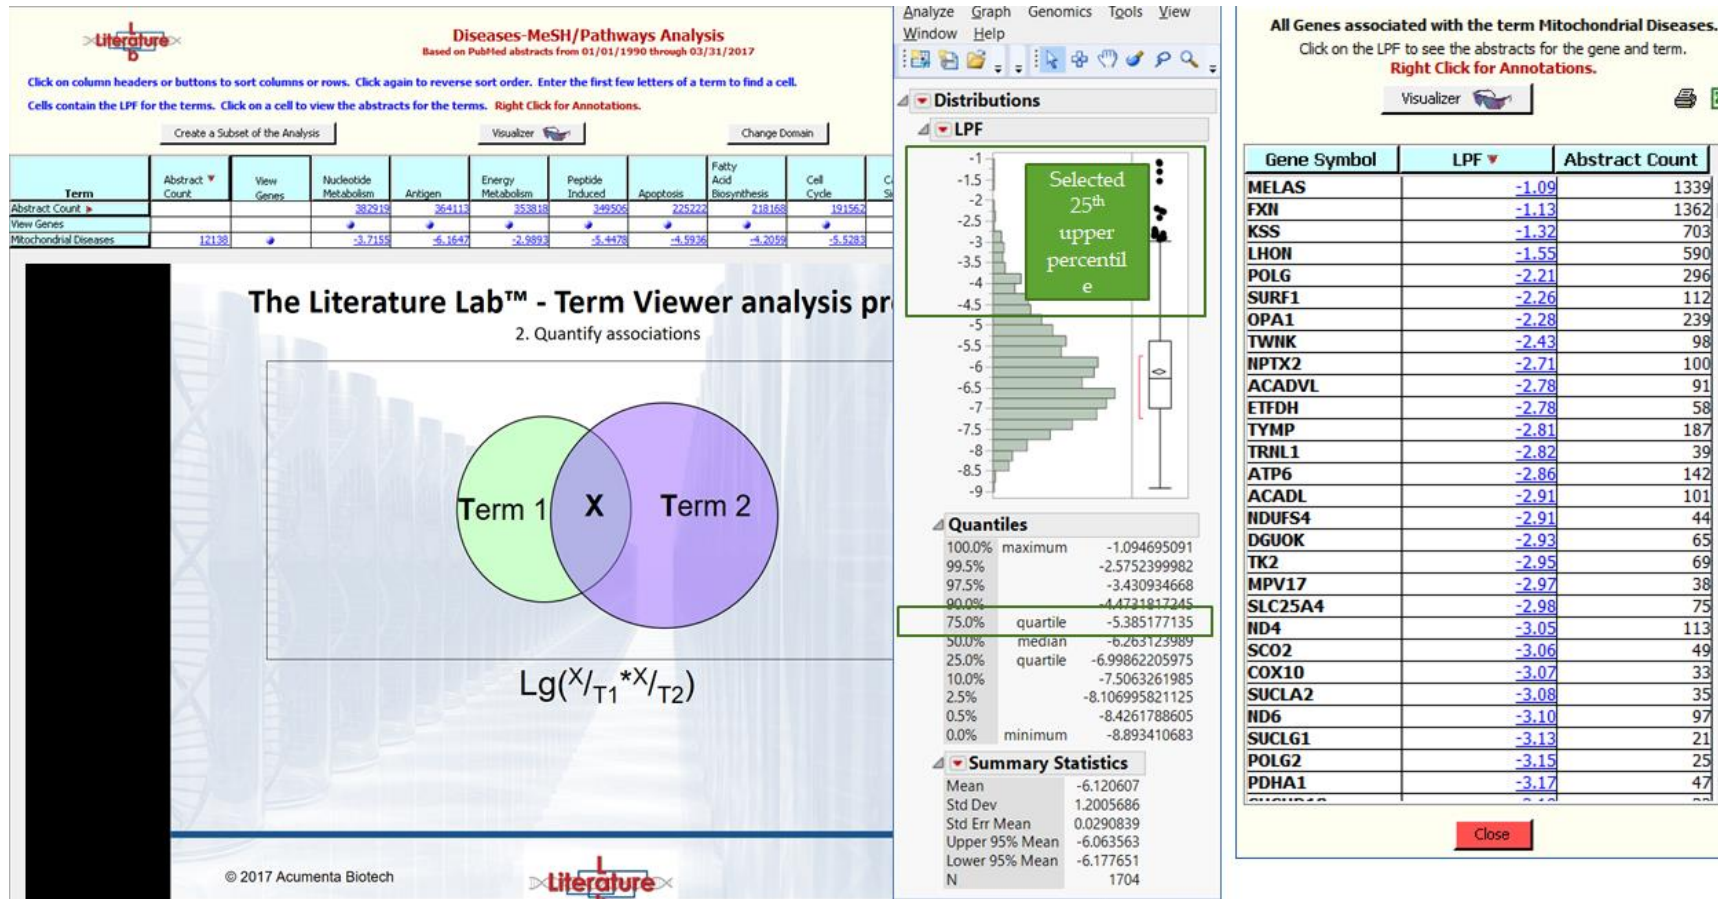

**Figure S16.** Forest plot of beta coefficients and their 95% confidence interval for studies contributing to seven significant mtDNA variants



Forest Plot

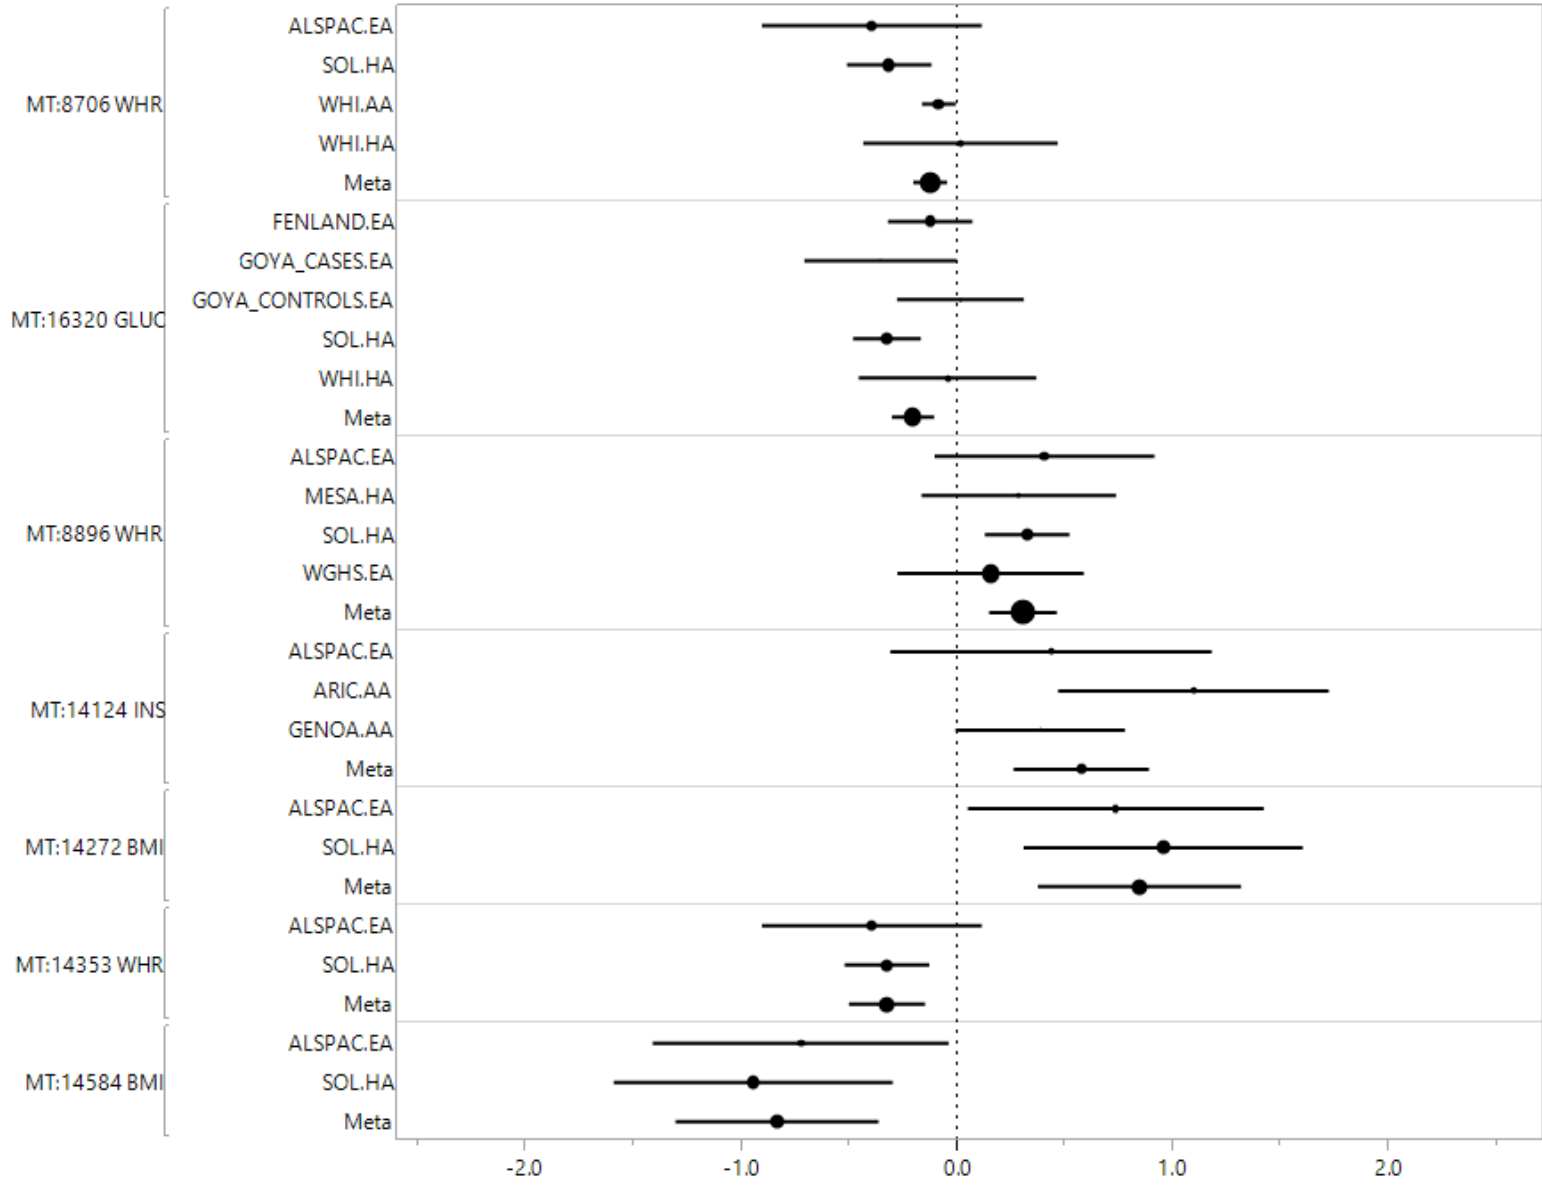

Variants beta-effects and their 95% CIs

---

**Figure S17.** Forest plot of beta coefficients and their 95% confidence interval for studies contributing to MT-ND3-Gene based meta-analysis of 82 rare SNVs

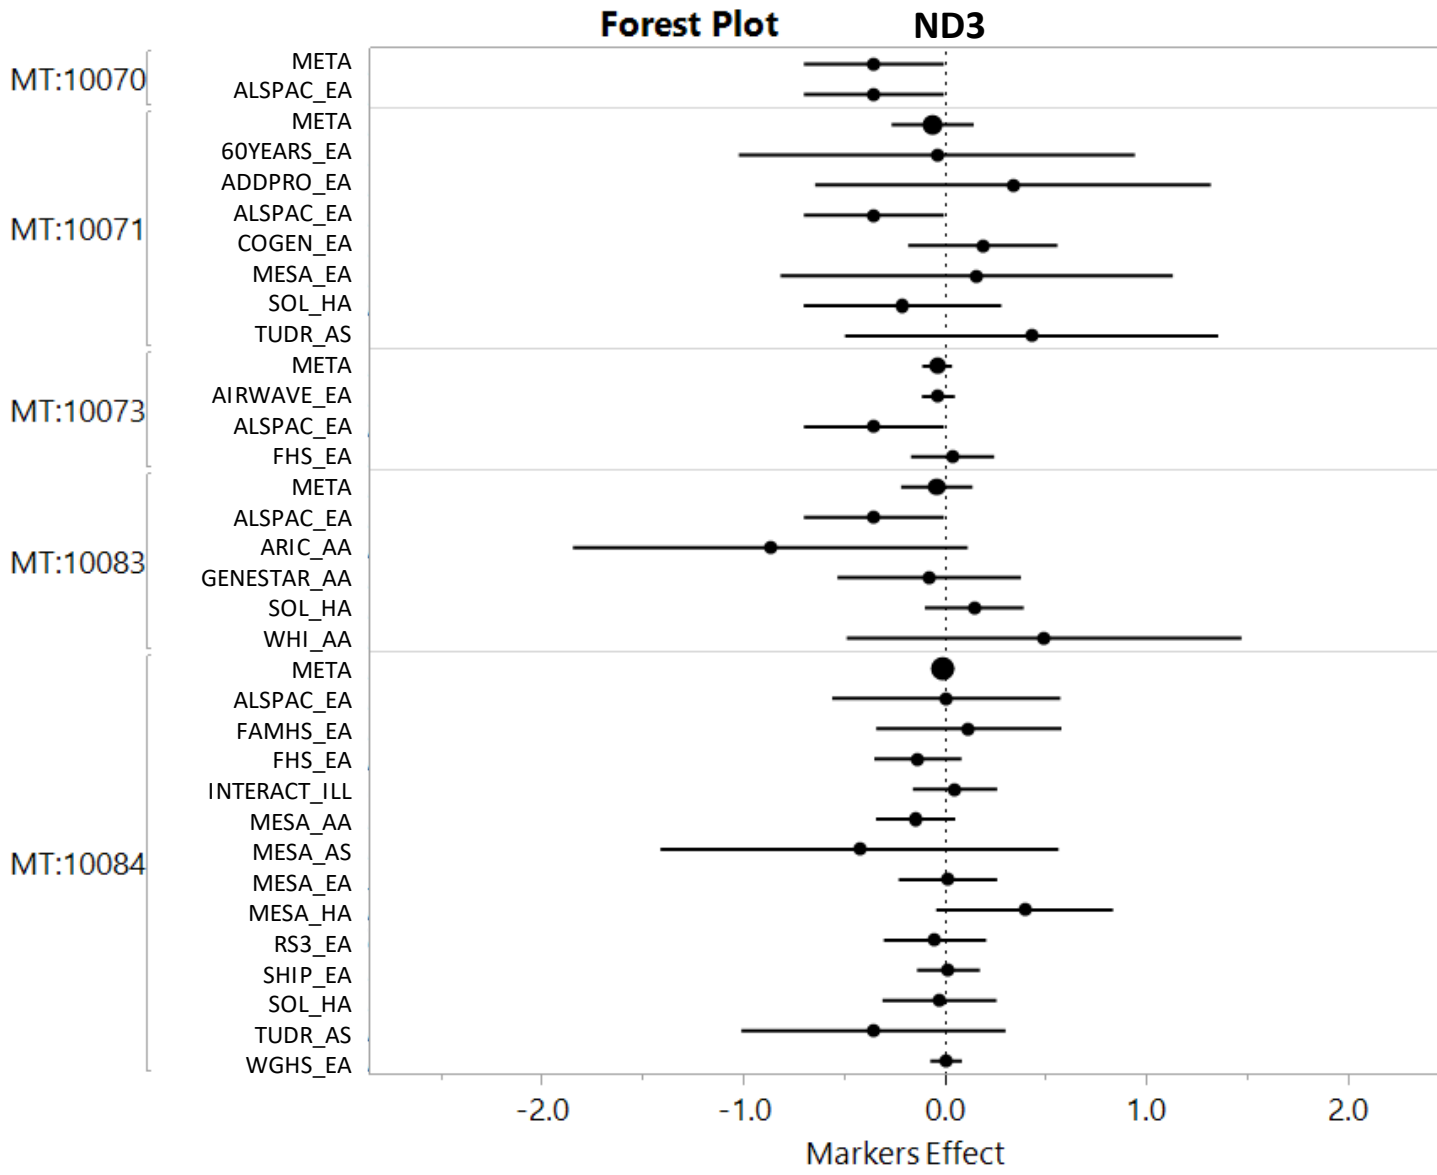

### Forest Plot ND3

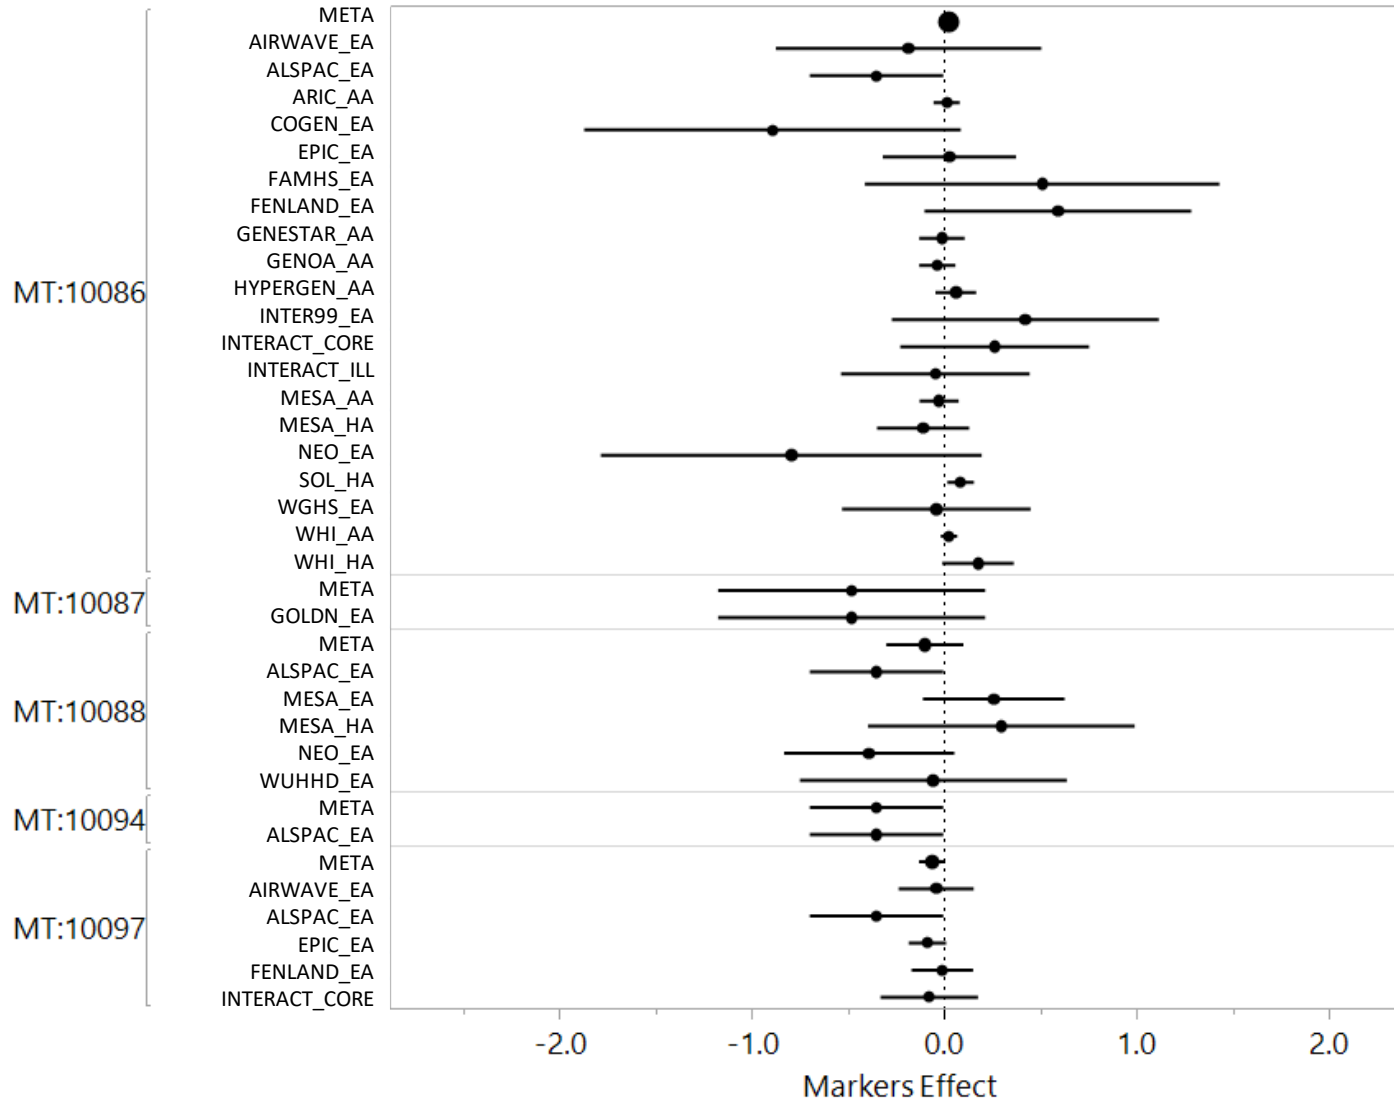

### Forest Plot ND3

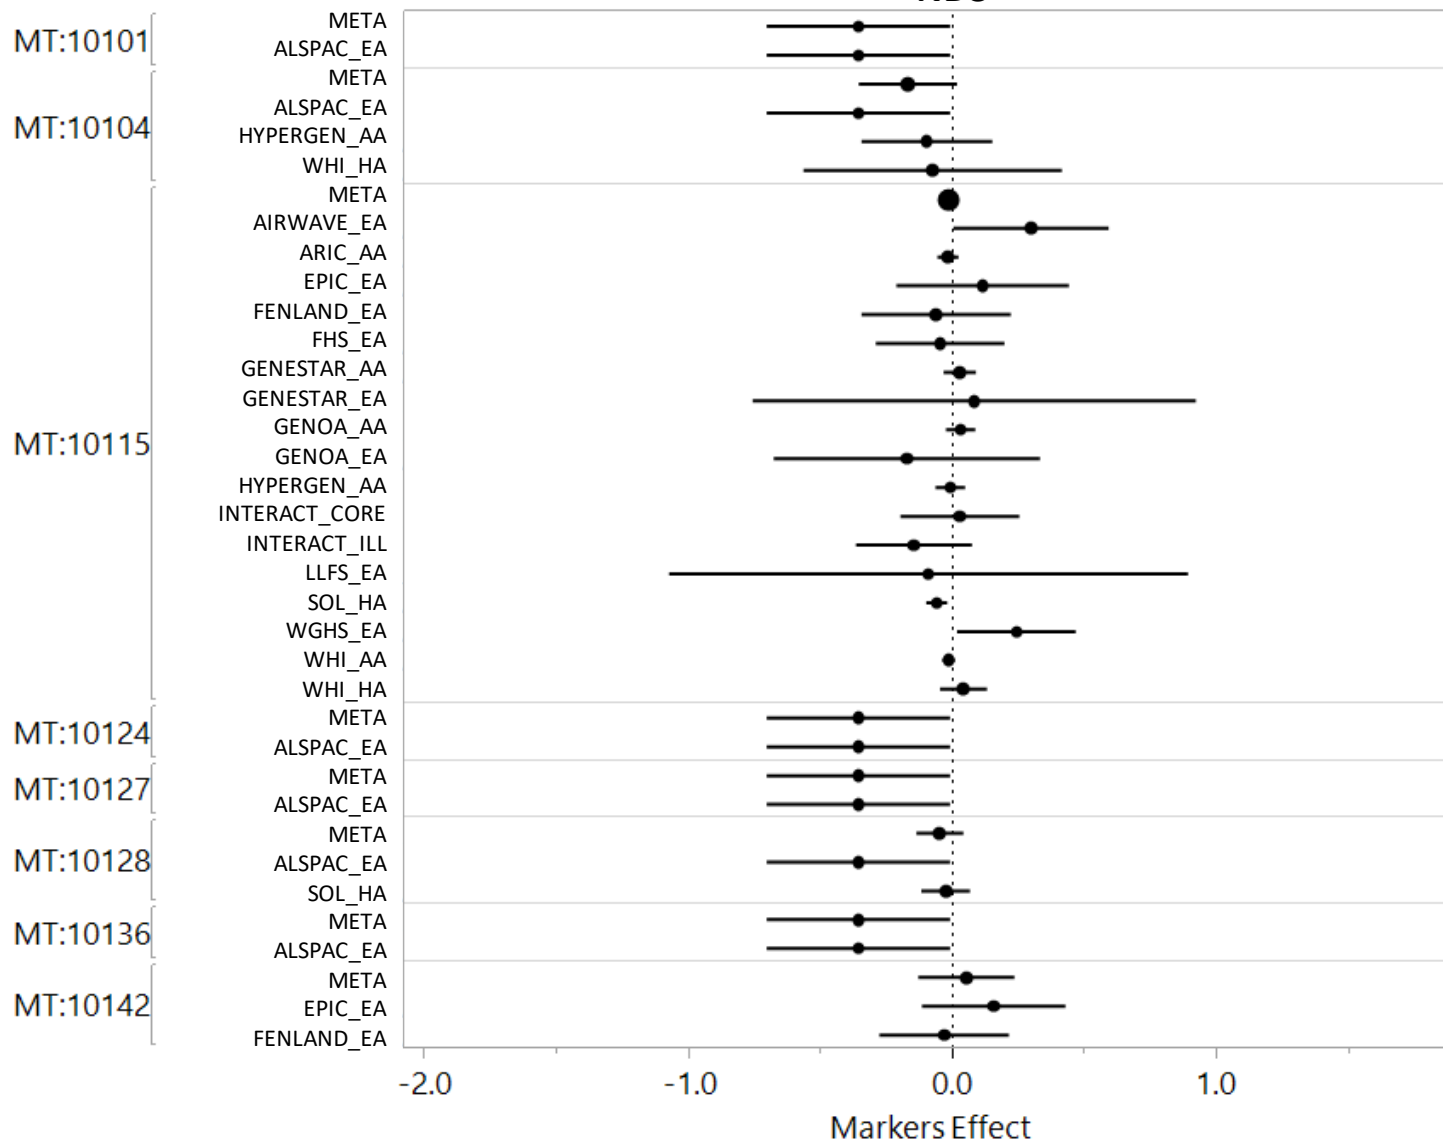

**Forest Plot ND3**

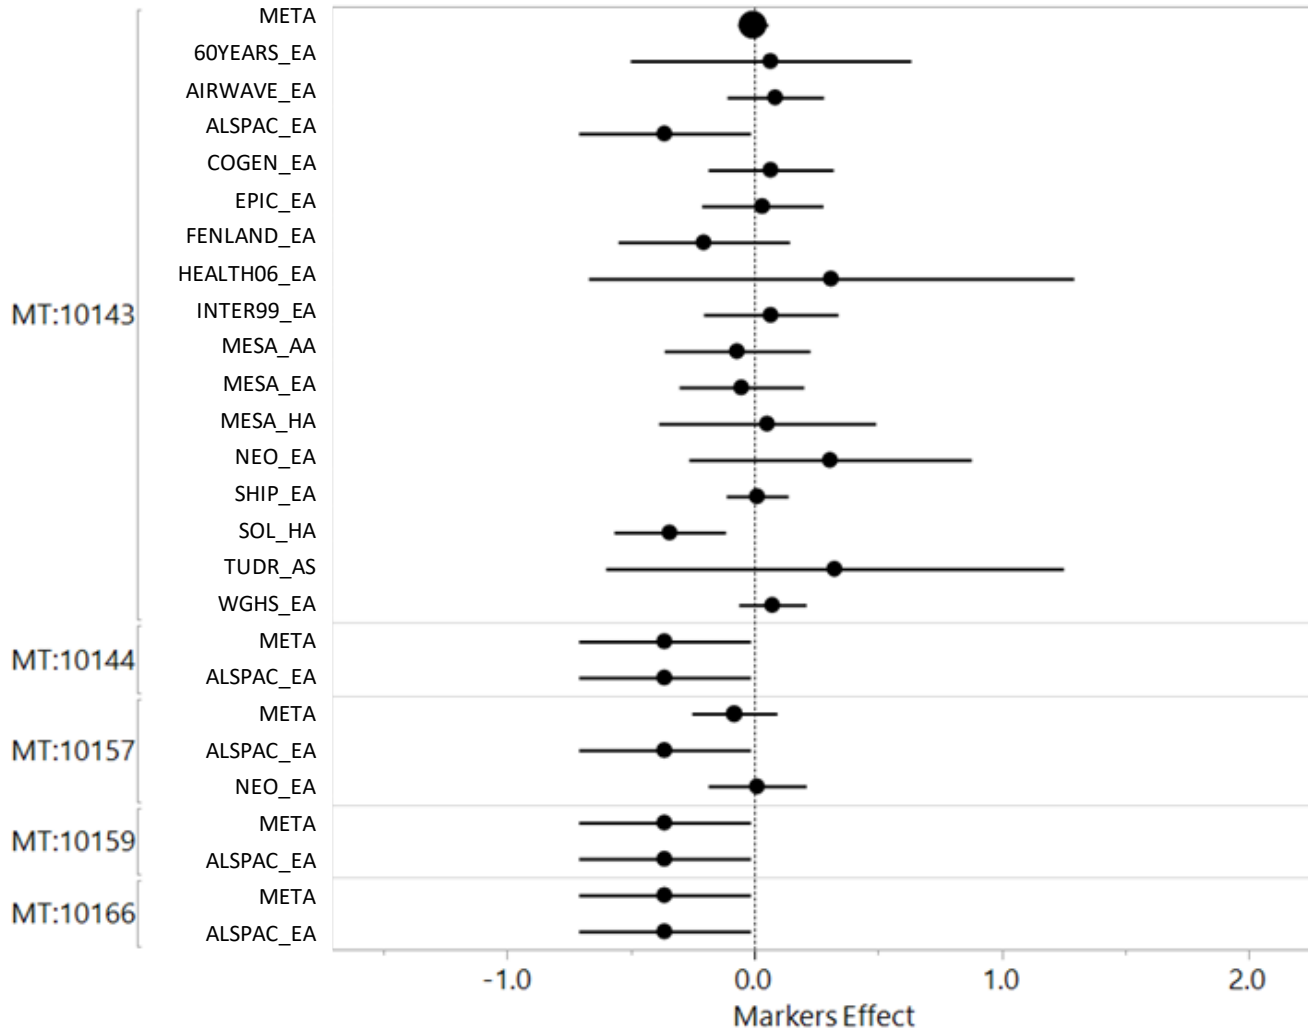

### Forest Plot ND3

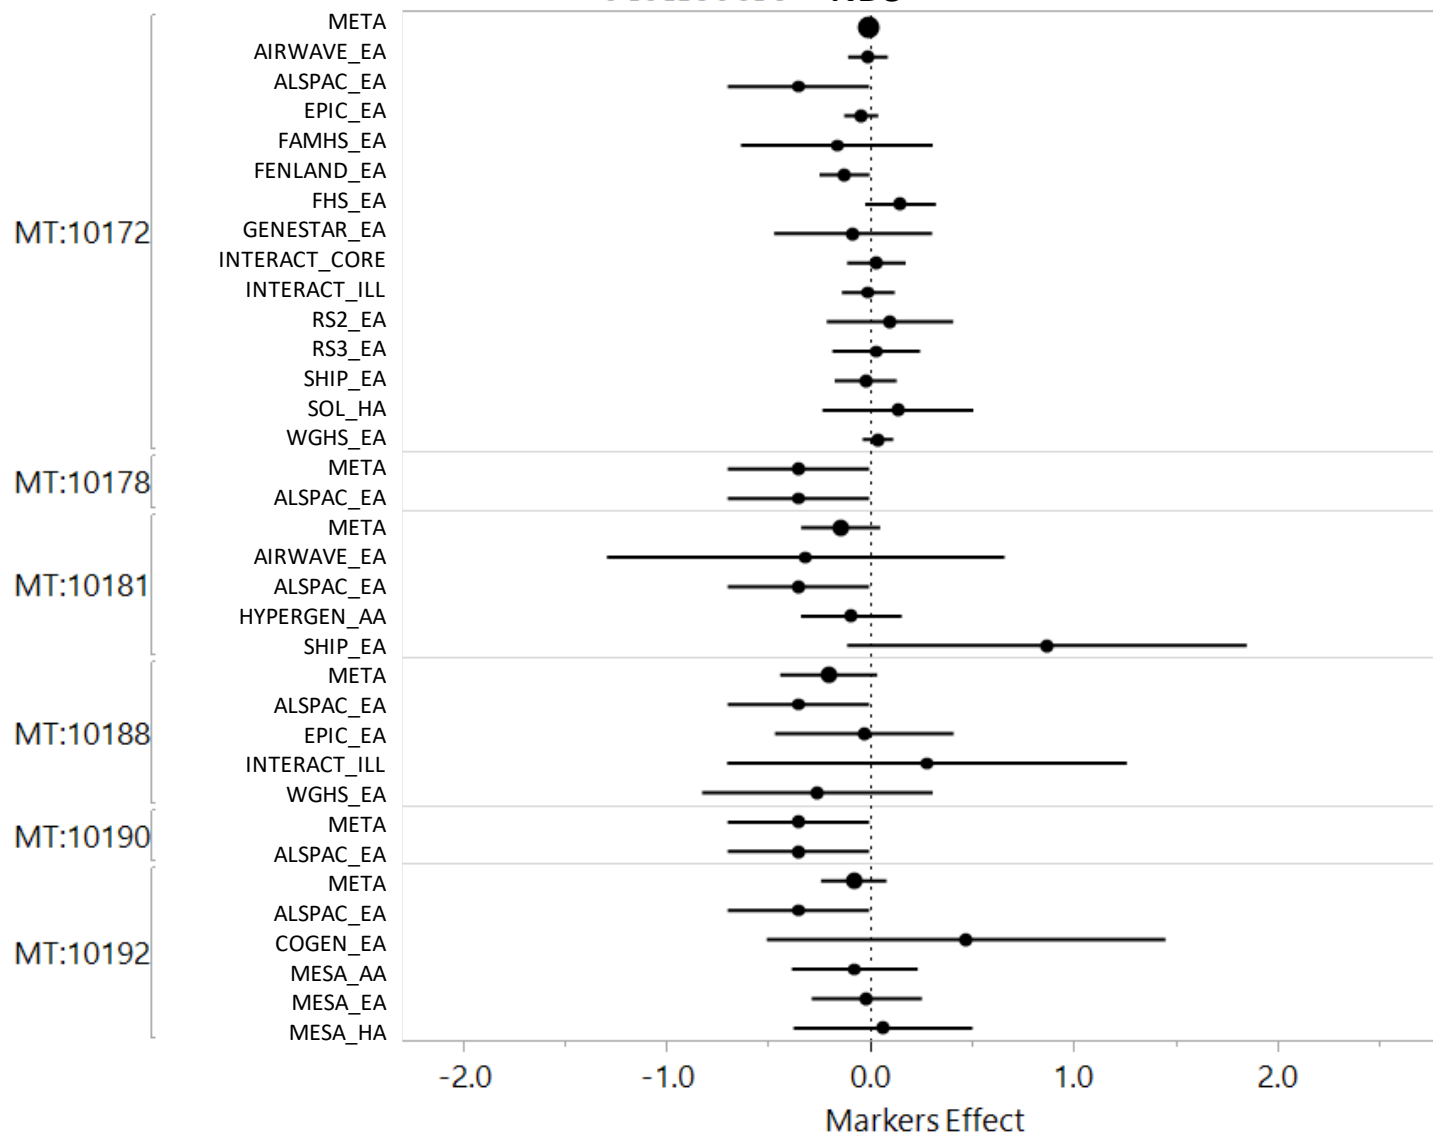

**Forest Plot ND3**

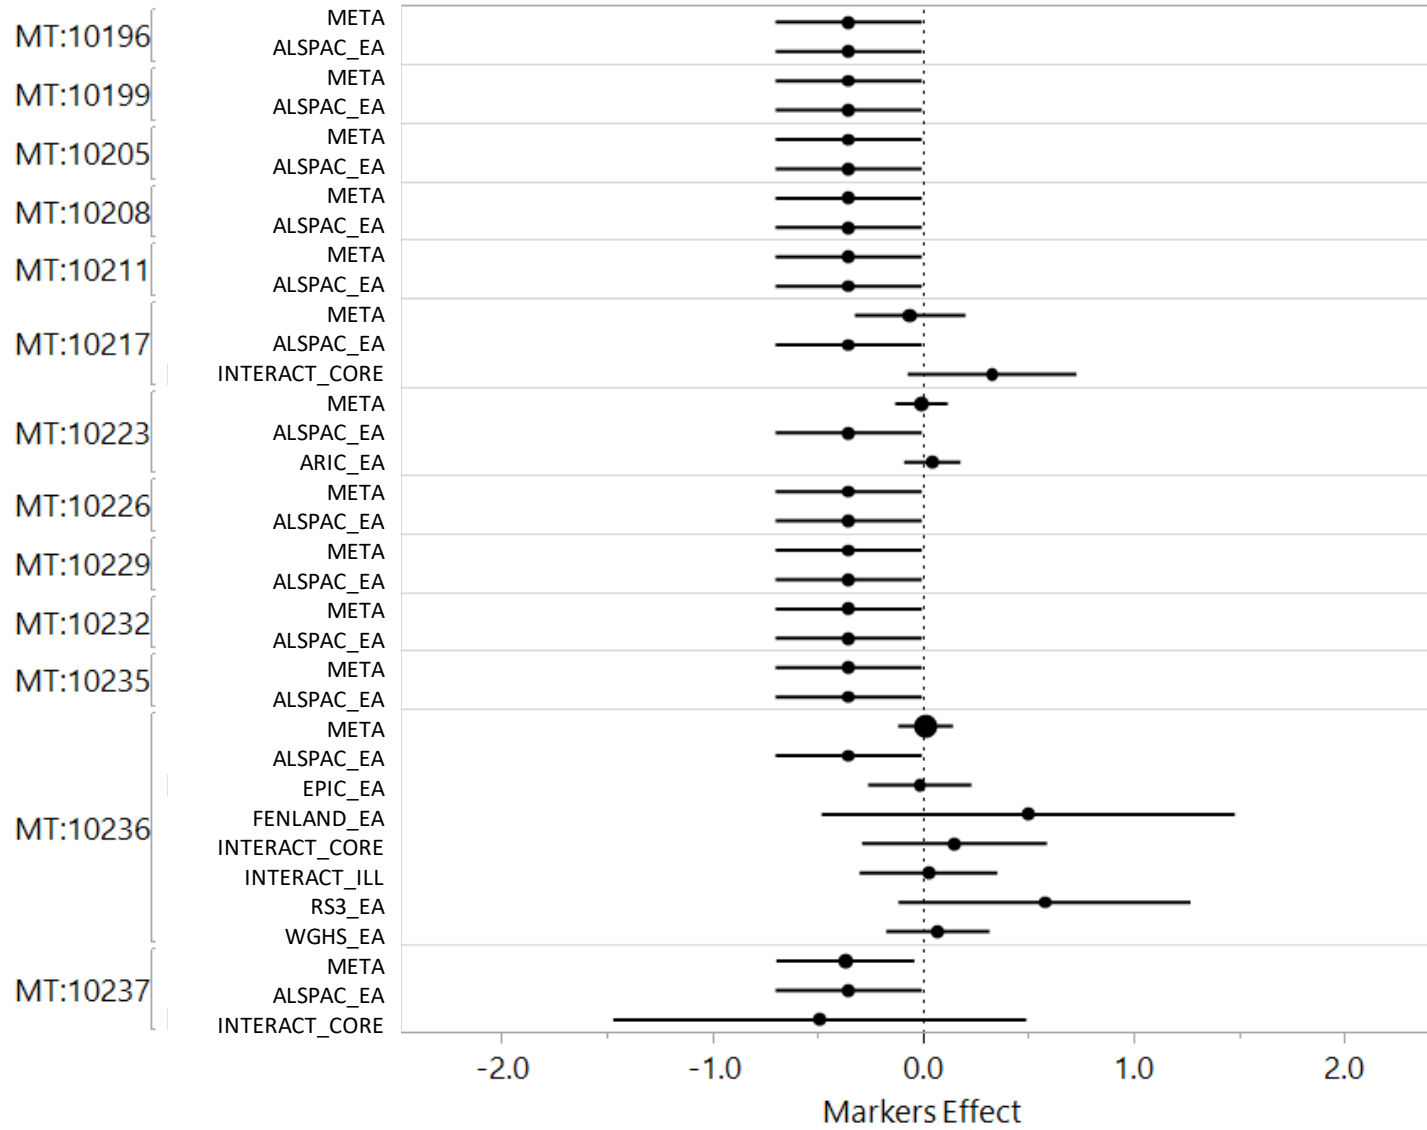



**Forest Plot ND3**

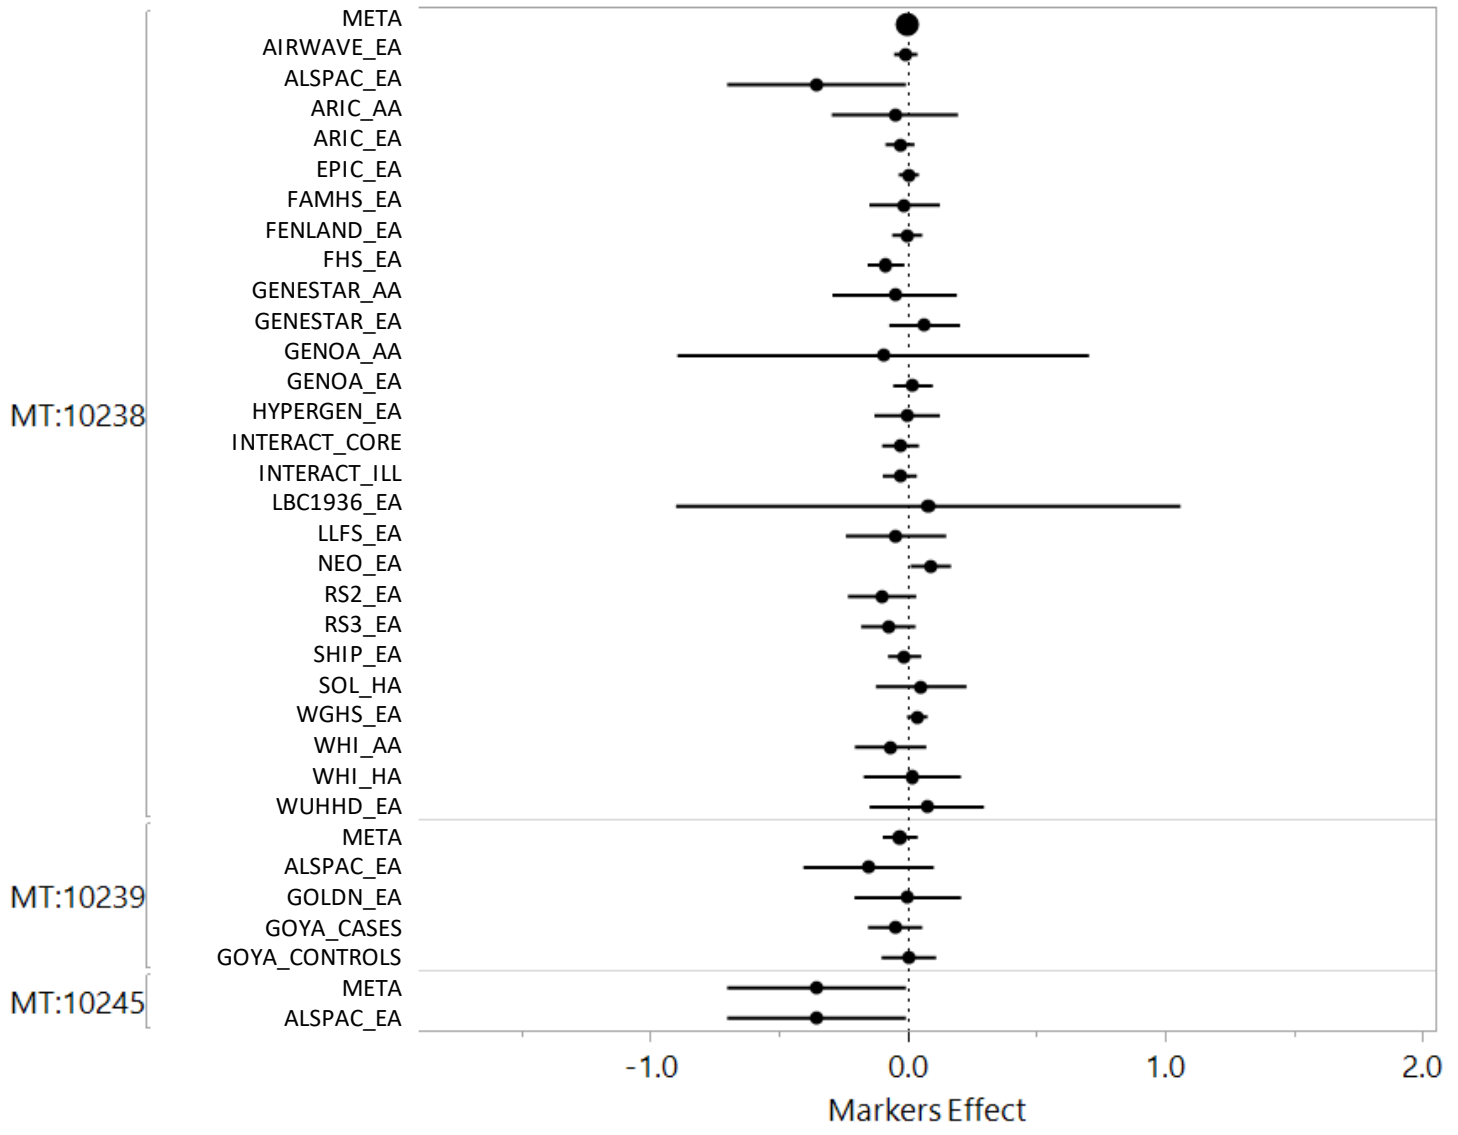

### Forest Plot ND3

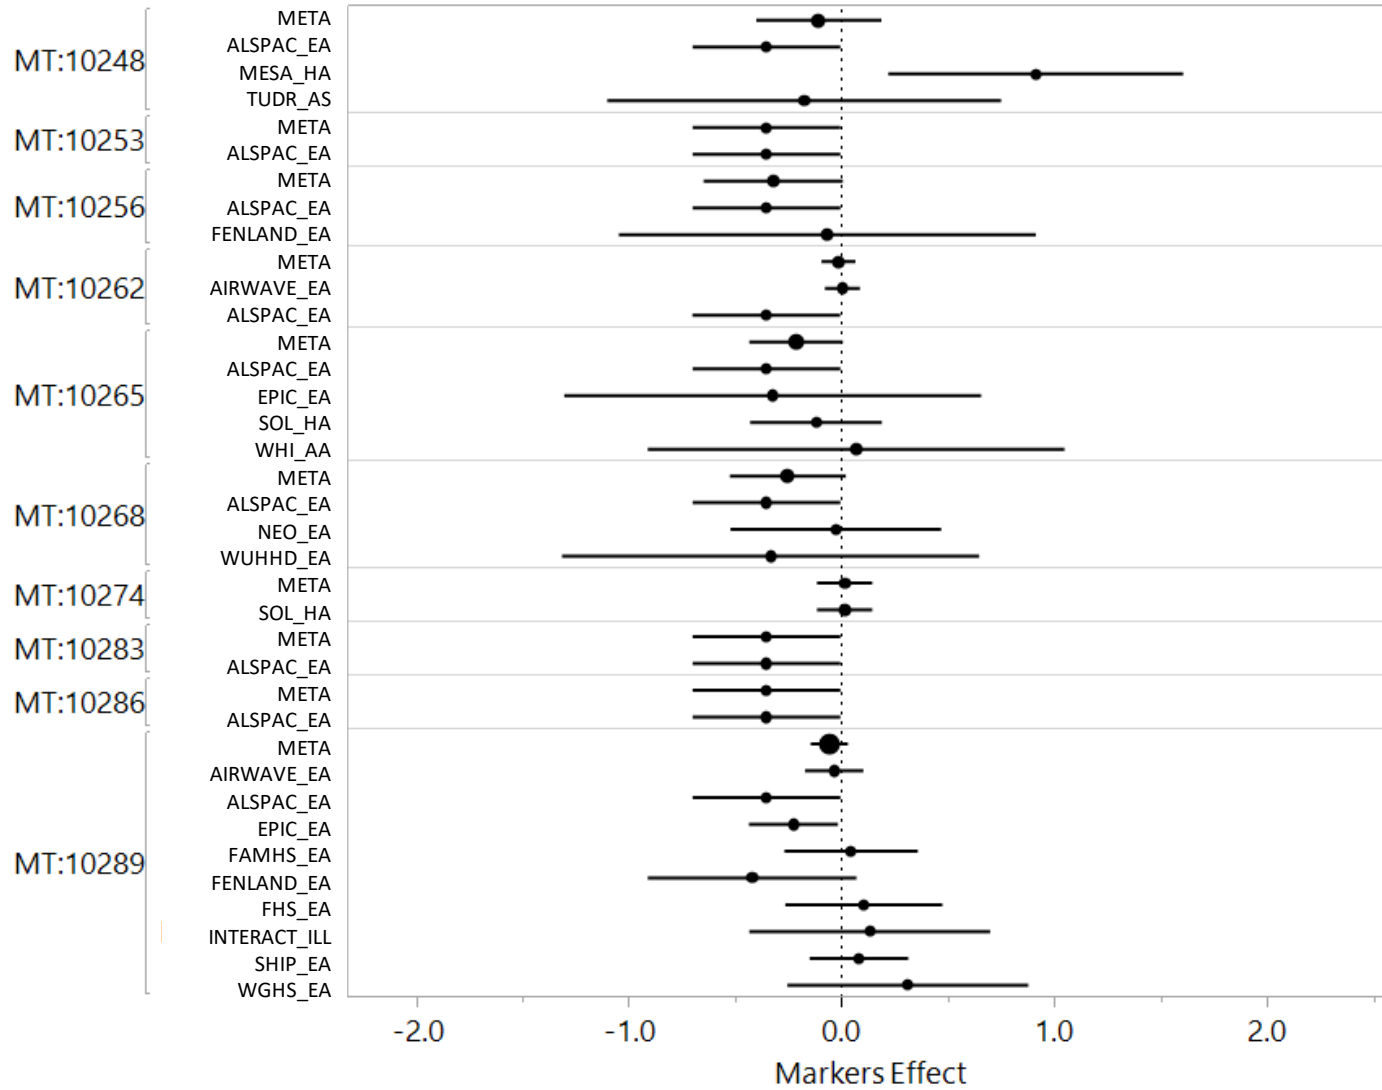

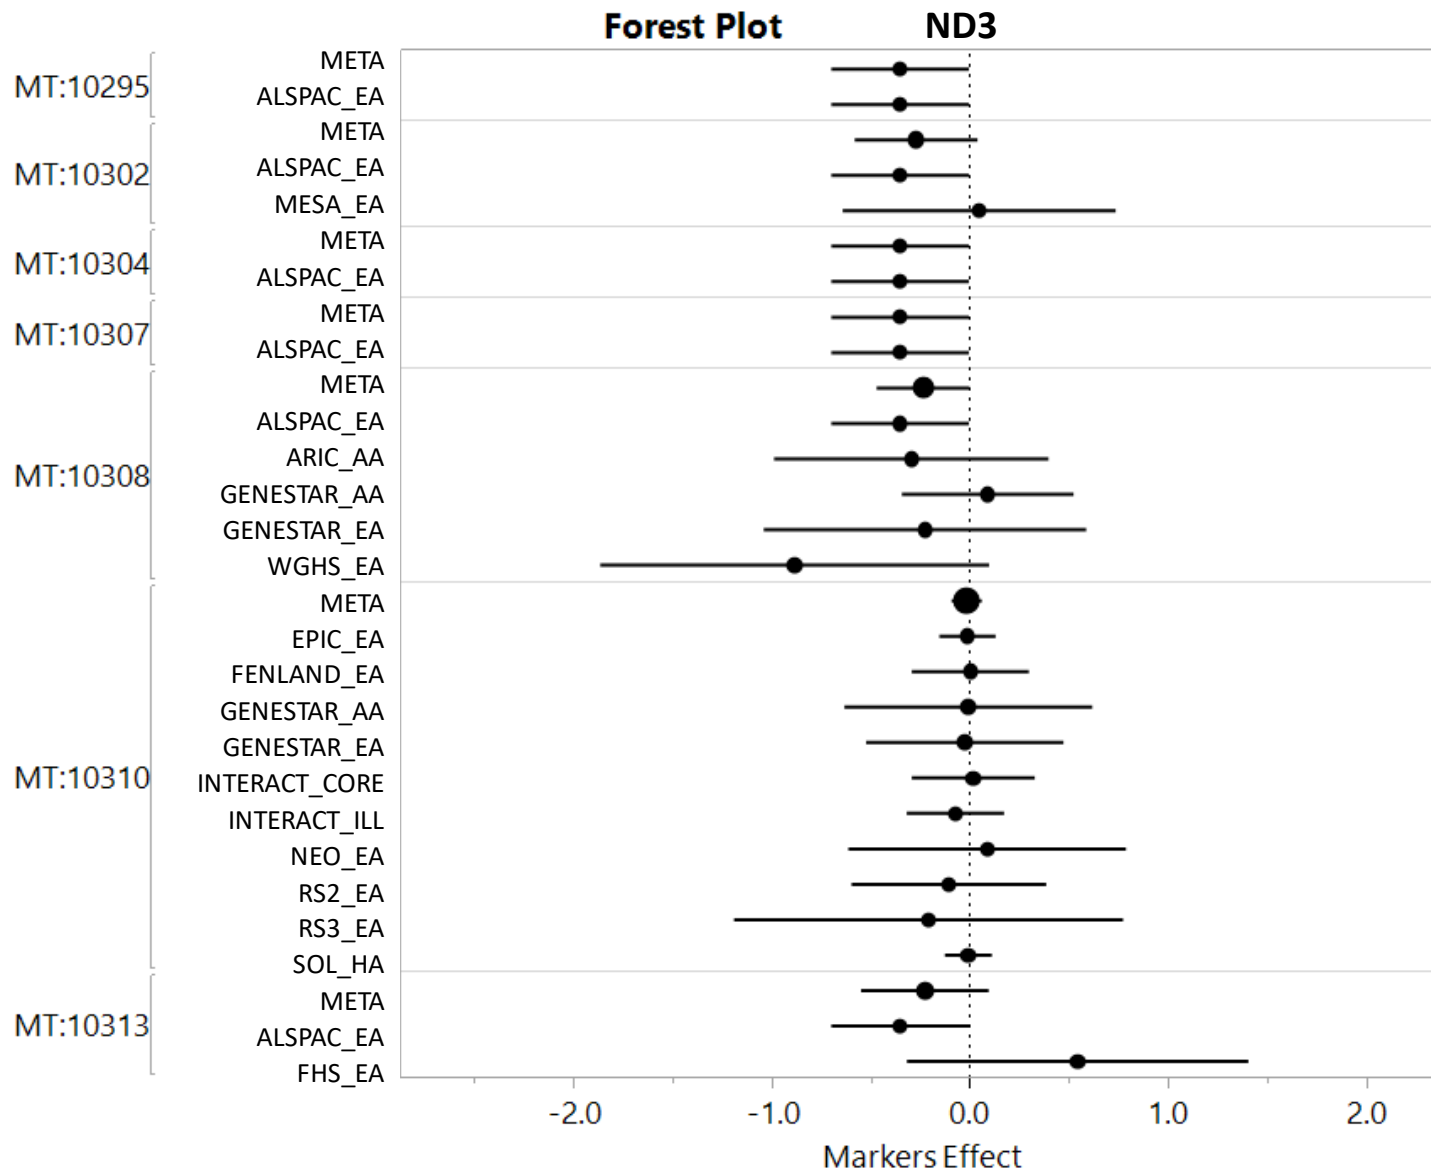

**Forest Plot ND3**

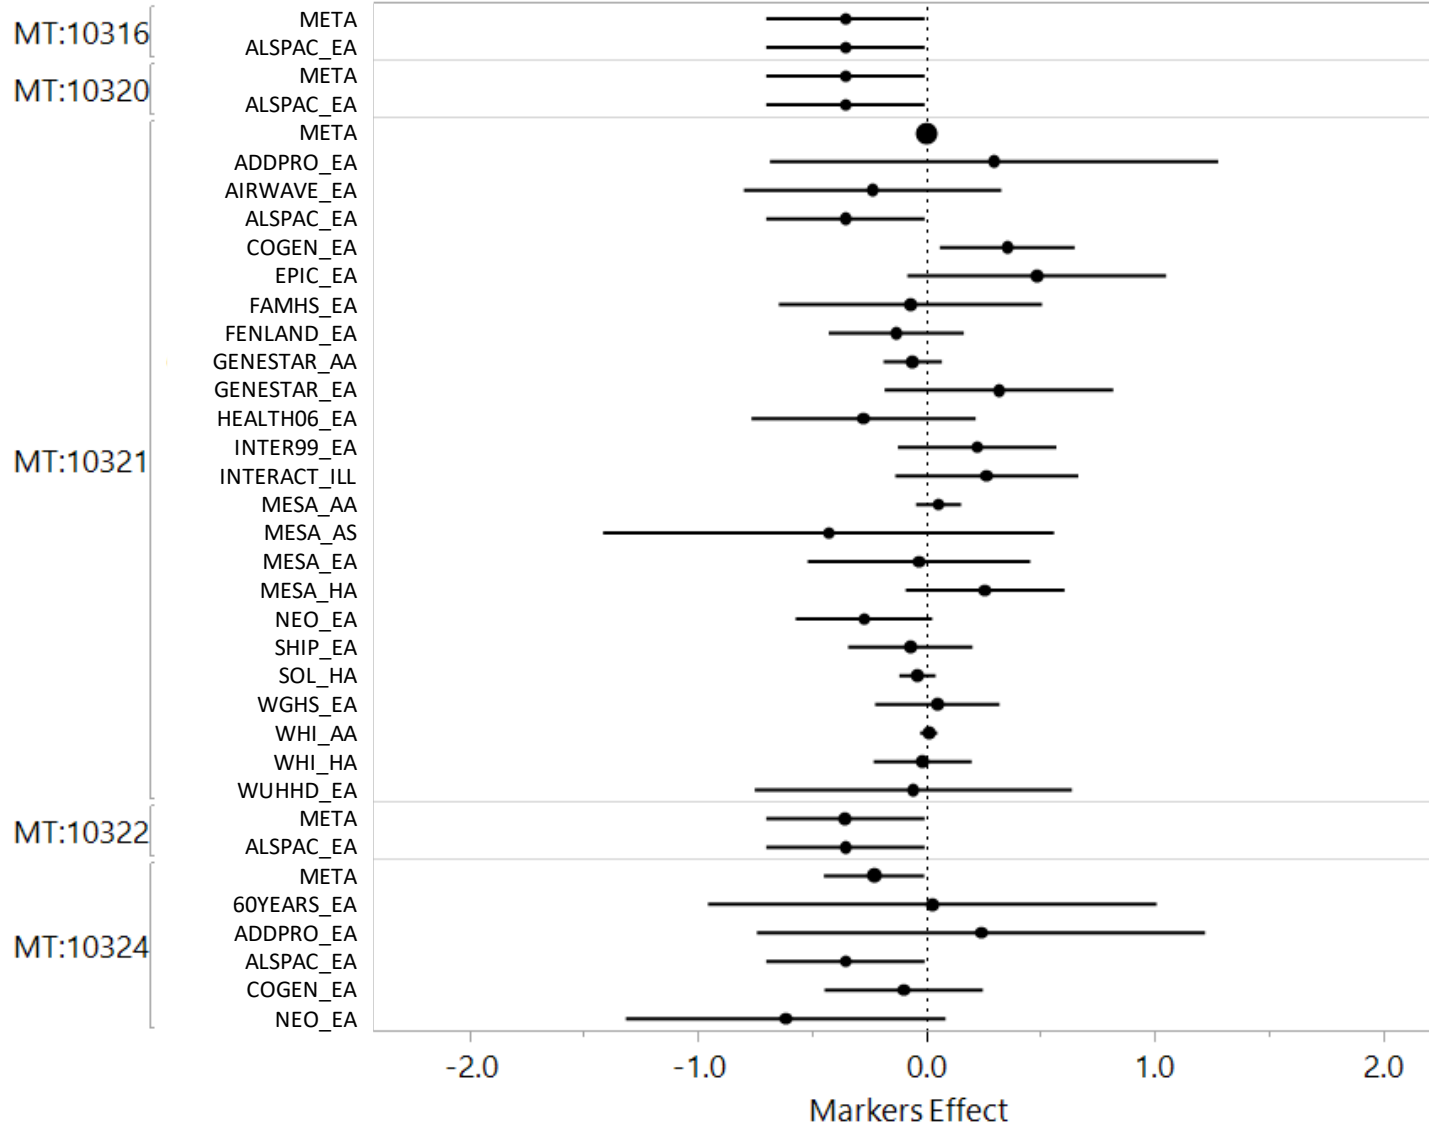

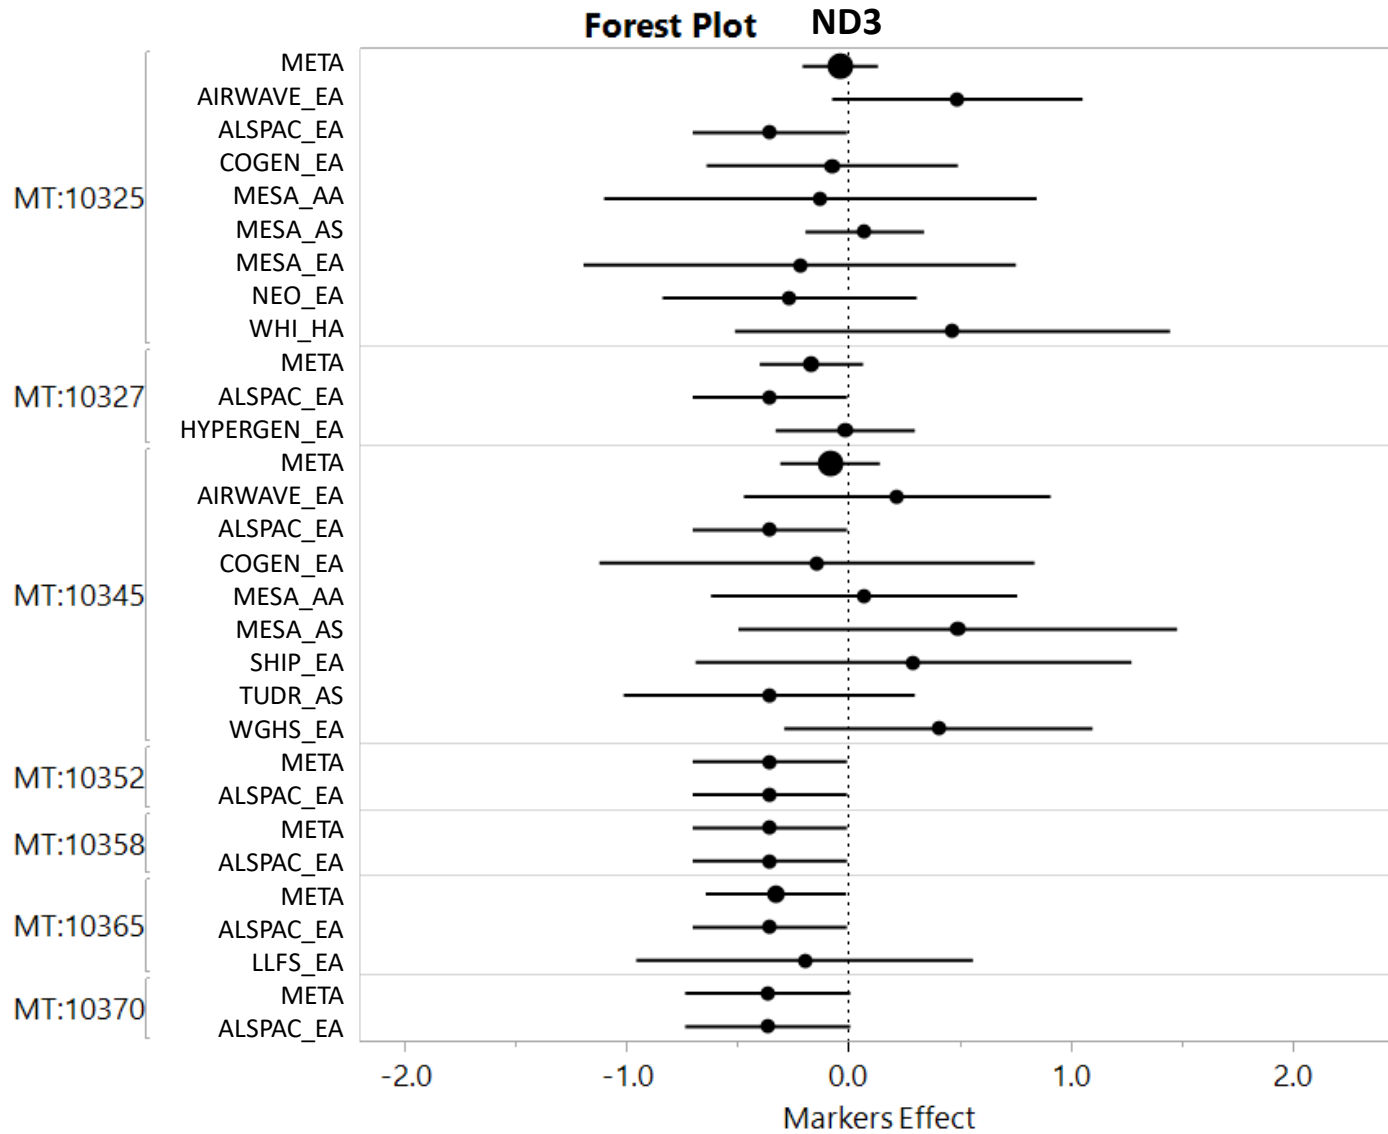

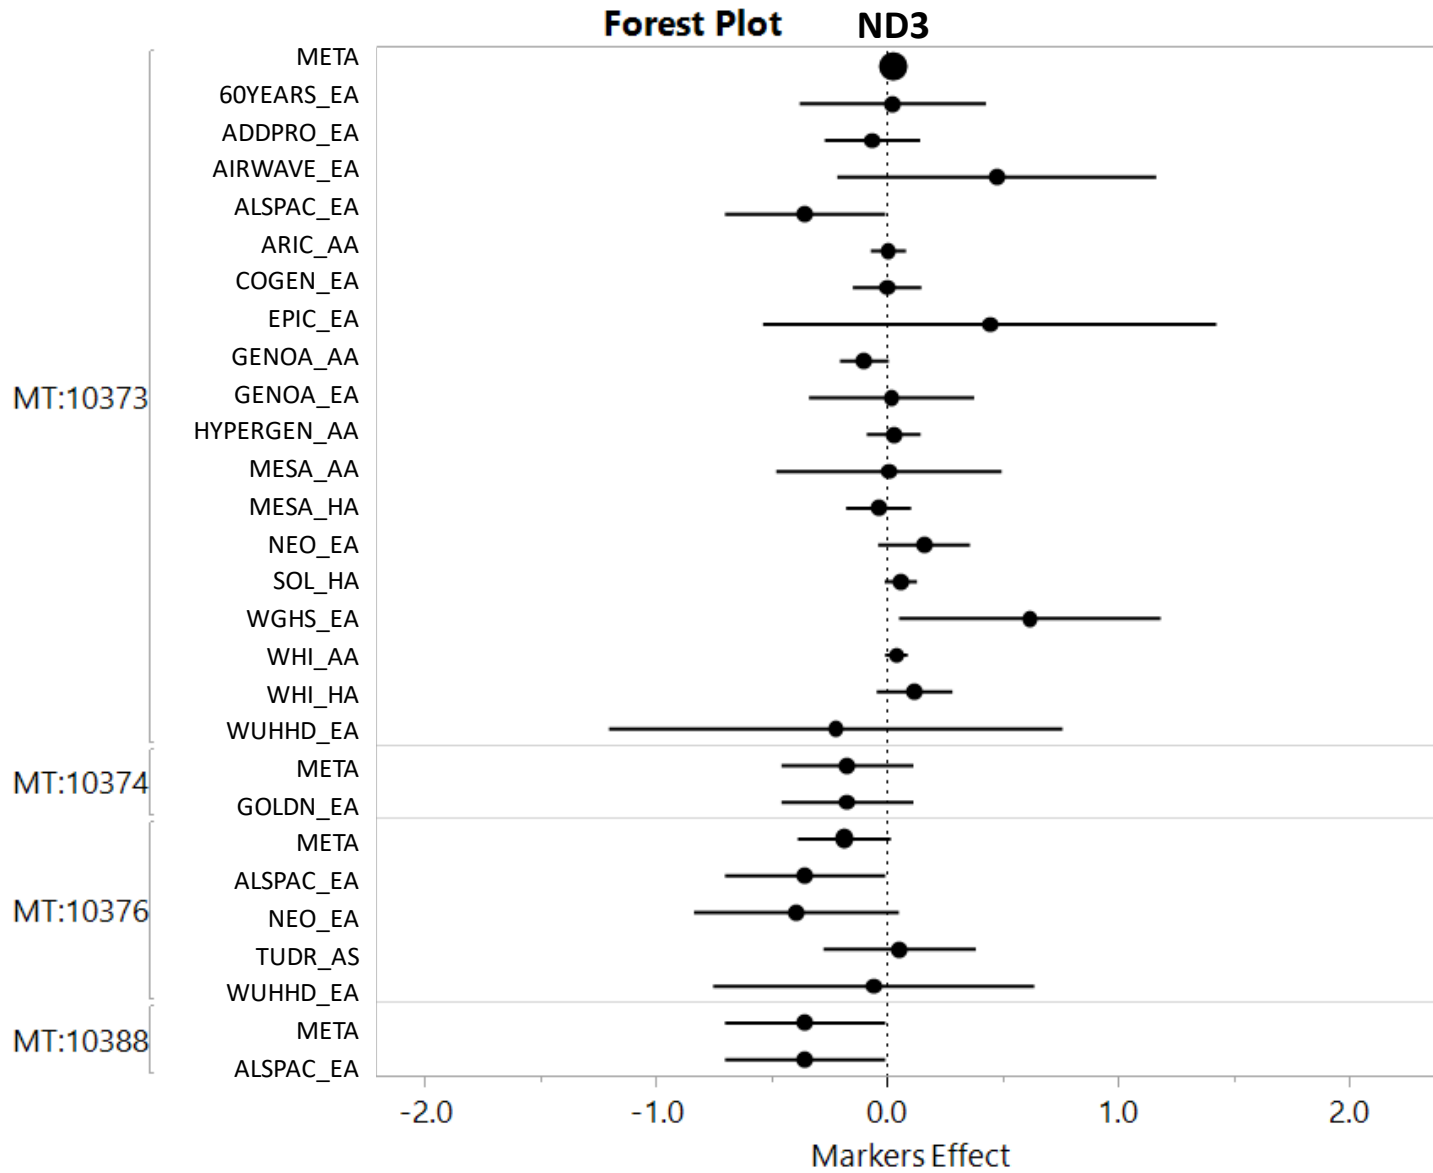

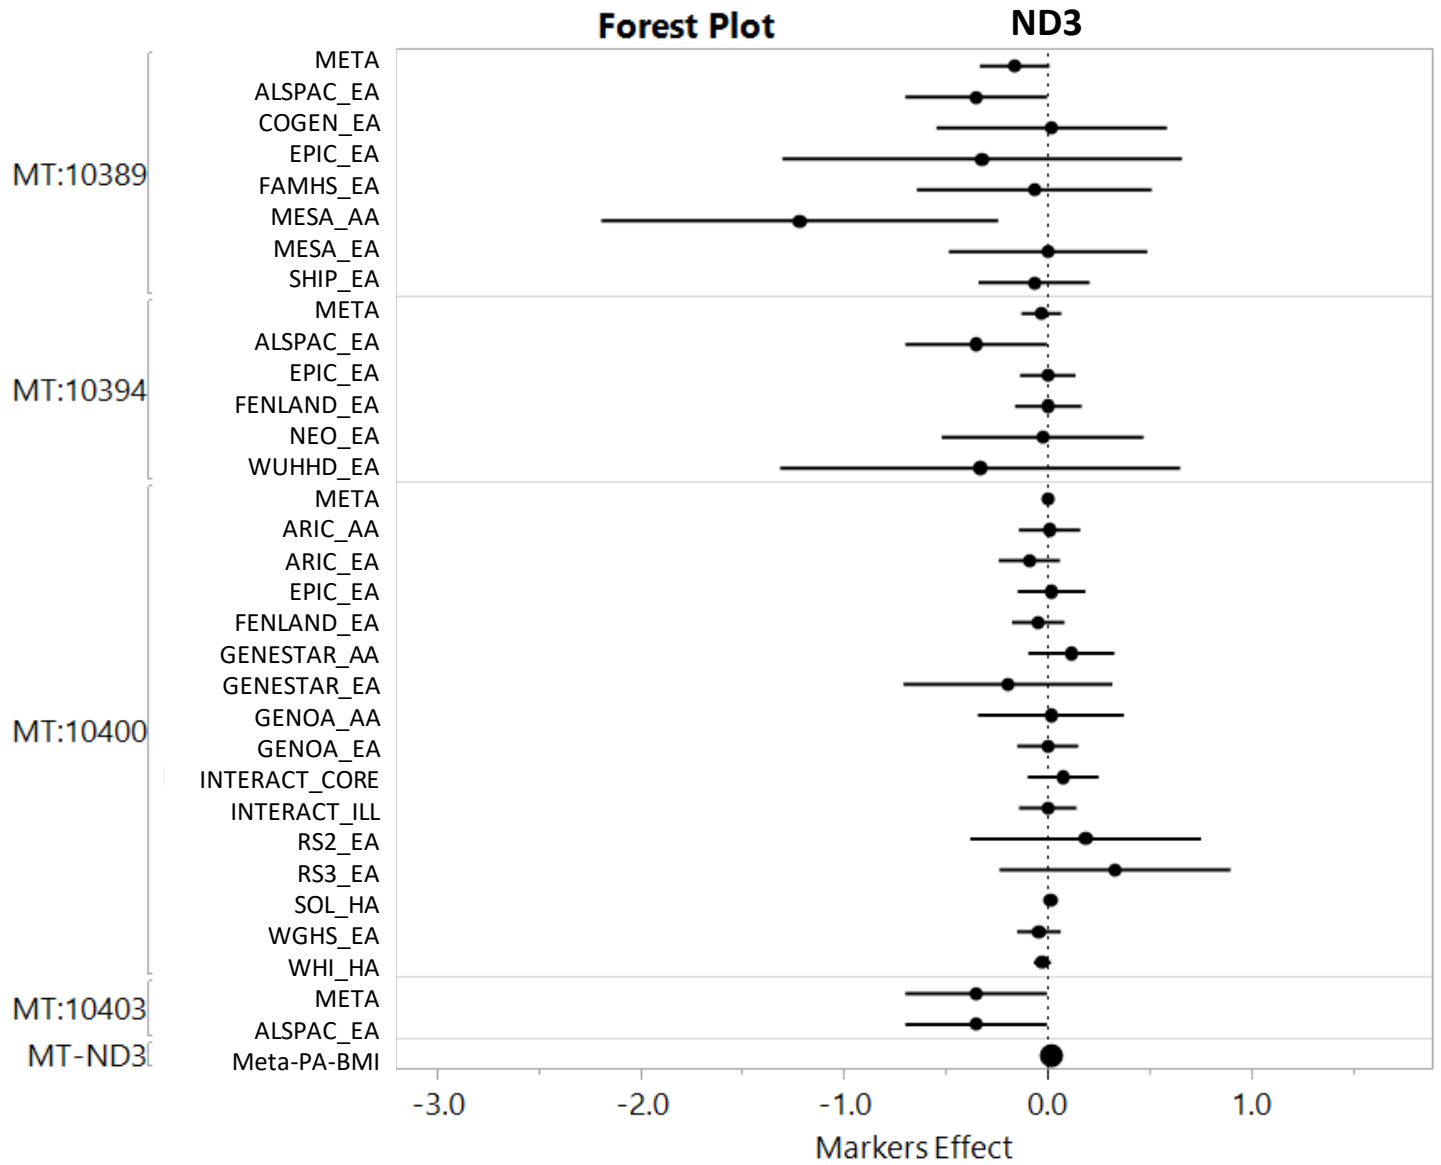

---

## 2. Supplementary Tables

**Table S1.** Summary Statistics for 7 Phenotypes Studied by Cohort



| Ancestry  | Cohort               | BMI   |       |       | WHR   |      |       | GLUC  |        |       | INS   |       |       | HOMAB  |        |        | HOMAIR |      |       | HBA1C |      |      |
|-----------|----------------------|-------|-------|-------|-------|------|-------|-------|--------|-------|-------|-------|-------|--------|--------|--------|--------|------|-------|-------|------|------|
|           |                      | N     | Mean  | SD    | N     | Mean | SD    | N     | Mean   | SD    | N     | Mean  | SD    | N      | Mean   | SD     | N      | Mean | SD    | N     | Mean | SD   |
| European  | AIRWAVE              | 16025 | 27.2  | 4.1   | 15979 | 0.86 | 0.07  | 958   | 95.5   | 9.5   |       |       |       |        |        |        |        |      |       | 16012 | 5.58 | 0.39 |
|           | ALSPAC               | 3628  | 22.7  | 3.9   | 5303  | 0.84 | 0.06  | 2761  | 93.76  | 6.39  | 2767  | 10.01 | 4.92  | 2752   | 108.53 | 55.65  | 2752   | 2.33 | 1.21  | 1456  | 4.91 | 0.29 |
|           | ARIC                 | 9481  | 27    | 4.86  | 9473  | 0.93 | 0.08  | 8651  | 98.73  | 9.21  | 9277  | 13.45 | 13.25 | 8646   | 112.91 | 74.94  | 8648   | 3.05 | 2.47  |       |      |      |
|           | DANISH-60YEARS       | 642   | 26.58 | 3.76  | 651   | 0.90 | 0.09  | 612   | 94.42  | 9.72  | 612   | 7.18  | 4.07  | 612    | 76.54  | 38.17  | 612    | 1.72 | 1.11  |       |      |      |
|           | DANISH-ADDPRO        | 1505  | 27.17 | 4.18  | 1532  | 0.94 | 0.08  | 1264  | 105.68 | 9.62  | 1262  | 7.16  | 4.87  | 1262   | 55.78  | 41.05  | 1262   | 1.90 | 1.38  | 1539  | 5.75 | 0.47 |
|           | DANISH-COGEN         | 5653  | 27.26 | 4.40  |       |      |       | 1843  | 103.18 | 12.38 |       |       |       |        |        |        |        |      |       | 557   | 6.16 | 1.80 |
|           | DANISH-GOYA_CASES    | 3197  | 35.54 | 2.90  | 787   | 1.02 | 0.07  | 197   | 103.80 | 9.01  | 196   | 11.06 | 7.71  | 196    | 91.57  | 62.02  | 196    | 2.88 | 2.09  | 224   | 5.94 | 1.02 |
|           | DANISH-GOYA_CONTROLS | 3243  | 22.34 | 2.71  | 910   | 0.93 | 0.06  | 307   | 101.15 | 8.57  | 302   | 6.39  | 4.68  | 302    | 55.39  | 37.50  | 302    | 1.63 | 1.26  | 317   | 5.63 | 0.43 |
|           | DANISH-HEALTH06      | 2815  | 25.44 | 3.89  | 2907  | 0.87 | 0.09  | 2616  | 97.55  | 9.73  | 2616  | 6.81  | 4.65  | 2616   | 64.33  | 95.72  | 2616   | 1.68 | 1.25  | 2906  | 5.43 | 0.48 |
|           | DANISH-INTER99       | 5979  | 25.86 | 3.86  | 6136  | 0.86 | 0.09  | 5723  | 98.02  | 9.20  | 5506  | 6.85  | 4.50  | 5500   | 66.08  | 59.27  | 5500   | 1.68 | 1.16  | 6153  | 5.86 | 0.63 |
|           | DANISH-VEJLE         | 2367  | 28.65 | 5.41  | 2392  | 0.95 | 0.08  |       |        |       |       |       |       |        |        |        |        |      |       | 2408  | 6.68 | 1.13 |
|           | EPIC-INTERACT_CORE   | 6745  | 27.26 | 4.79  | 6036  | 0.87 | 0.1   | 632   | 90.33  | 12.71 |       |       |       |        |        |        |        |      |       | 4056  | 5.42 | 0.35 |
|           | EPIC-INTERACT_ILL    | 8364  | 27.92 | 4.96  | 7583  | 0.88 | 0.09  | 714   | 90.07  | 13.62 |       |       |       |        |        |        |        |      |       | 4065  | 5.43 | 0.34 |
|           | EPIC-NORFOLK         | 19225 | 26.29 | 3.82  | 19199 | 0.86 | 0.09  |       |        |       |       |       |       |        |        |        |        |      |       | 8499  | 5.19 | 0.55 |
|           | FAMHS                | 3677  | 27.74 | 5.47  | 3674  | 0.92 | 0.09  | 3362  | 94.04  | 9.86  | 3610  | 11.57 | 13.43 | 3353   | 116.10 | 211.22 | 3356   | 2.48 | 2.10  |       |      |      |
|           | FENLAND              | 8453  | 26.91 | 4.83  | 8437  | 0.88 | 0.09  | 8407  | 86.43  | 8.75  | 7084  | 7.96  | 6.51  | 7066   | 112.68 | 85.9   | 7066   | 1.74 | 1.57  | 5377  | 5.52 | 0.33 |
|           | FHS                  | 6930  | 27.44 | 5.46  | 6046  | 0.93 | 0.08  | 6423  | 93.51  | 8.7   | 5984  | 29.85 | 16.5  | 5982   | 364.97 | 218.5  | 5984   | 7.07 | 4.31  | 5175  | 5.46 | 0.3  |
|           | GENESTAR             | 1887  | 28.37 | 5.88  | 337   | 0.89 | 0.097 | 1577  | 89.85  | 10.05 | 651   | 9     | 7.41  | 646    | 123.38 | 102.7  | 650    | 2.03 | 1.87  |       |      |      |
|           | GENOA                | 1016  | 30.77 | 6.20  | 1012  | 0.91 | 0.10  | 1042  | 90.69  | 7.91  | 1021  | 8.01  | 5.09  | 1021   | 94.97  | 55.70  | 1021   | 1.67 | 1.13  |       |      |      |
|           | GOLDN                | 842   | 28.47 | 5.49  | 842   | 0.90 | 0.10  | 842   | 102.01 | 19.53 | 841   | 14.07 | 8.23  | 841    | 126.88 | 63.01  | 835    | 3.61 | 2.47  |       |      |      |
|           | HYPERGEN             | 1267  | 29.42 | 6.14  | 1251  | 0.91 | 0.09  | 1105  | 94.25  | 9.79  | 1103  | 7.49  | 5.3   | 985    | 86.74  | 33.9   | 985    | 1.06 | 0.68  |       |      |      |
|           | LBC1921              | 513   | 26.19 | 4.09  |       |      |       |       |        |       |       |       |       |        |        |        |        |      |       | 452   | 5.7  | 0.7  |
|           | LBC1936              | 1004  | 27.79 | 4.32  |       |      |       |       |        |       |       |       |       |        |        |        |        |      |       | 999   | 5.93 | 0.74 |
|           | LLFS                 | 4401  | 27.13 | 4.85  |       |      |       | 3840  | 91.73  | 11.42 | 3812  | 7.93  | 5.51  | 3779   | 97.33  | 79.86  | 3799   | 1.85 | 1.44  | 4163  | 5.53 | 0.35 |
|           | MESA                 | 2378  | 27.52 | 4.93  | 2378  | 0.92 | 0.09  | 2372  | 87.89  | 10.14 | 2372  | 8.76  | 4.98  | 2370   | 120.36 | 69.31  | 2370   | 1.95 | 1.26  | 2217  | 5.34 | 0.37 |
|           | NEO                  | 5744  | 29.99 | 4.83  | 5739  | 0.92 | 0.08  | 5096  | 98.53  | 9.71  | 5089  | 11.75 | 7.56  | 5089   | 110.97 | 69.82  | 5089   | 2.92 | 2.03  | 5097  | 5.34 | 0.26 |
|           | OOA                  | 2296  | 26.73 | 5.03  | 2231  | 0.87 | 0.07  | 2023  | 85.76  | 9.47  | 829   | 10.45 | 5.33  | 752    | 153.43 | 113.8  | 759    | 2.35 | 1.41  | 720   | 5.14 | 0.54 |
| PELOTAS   | 850                  | 26.87 | 5.34  | 852   | 0.81  | 0.08 |       |       |        |       |       |       |       |        |        |        |        |      | 842   | 5.06  | 0.41 |      |
| RS-II     | 2152                 | 27.23 | 3.99  | 1938  | 0.91  | 0.09 | 1758  | 100.6 | 9.14   | 1744  | 12.74 | 6.8   | 1744  | 114.57 | 58.89  | 1744   | 3.22   | 1.85 |       |       |      |      |
| RS-III    | 3026                 | 27.7  | 4.59  | 2926  | 0.87  | 0.08 | 2740  | 95.16 | 10.09  | 2665  | 14.94 | 9.38  | 2643  | 157.71 | 119.1  | 2658   | 3.59   | 2.49 |       |       |      |      |
| SHIP      | 8205                 | 27.73 | 5.01  | 8196  | 0.88  | 0.09 | 2741  | 95.98 | 10.47  | 477   | 1.58  | 0.58  | 471   | 3.9    | 0.56   | 477    | 0.17   | 0.62 | 6982  | 5.19  | 0.51 |      |
| WGHS      | 22203                | 25.88 | 4.88  | 19568 | 0.83  | 0.08 |       |       |        |       |       |       |       |        |        |        |        |      | 21970 | 5.01  | 0.28 |      |
| WUHHH     | 710                  | 29.82 | 6.38  | 681   | 0.87  | 0.08 | 558   | 87.34 | 12.48  | 567   | 9.4   | 7.87  | 541   | 142.05 | 160.3  | 548    | 2.1    | 1.88 |       |       |      |      |
| African   | ARIC                 | 2860  | 29.7  | 6.06  | 2857  | 0.92 | 0.08  | 2250  | 98.73  | 10.13 | 2587  | 19.32 | 28.42 | 2244   | 152.5  | 103.1  | 2249   | 4.1  | 3.49  |       |      |      |
|           | GENESTAR             | 1165  | 31.36 | 7.52  | 552   | 0.88 | 0.076 | 949   | 90.49  | 11.79 | 500   | 10.78 | 7.04  | 496    | 141.03 | 109.2  | 499    | 2.49 | 1.83  |       |      |      |
|           | GENOA                | 1003  | 31.74 | 6.57  | 1001  | 0.90 | 0.06  | 688   | 91.56  | 8.28  | 687   | 9.22  | 7.95  | 687    | 106.80 | 94.22  | 687    | 1.94 | 1.72  |       |      |      |
|           | HYPERGEN             | 1256  | 32.54 | 8.02  | 1242  | 0.9  | 0.08  | 991   | 93.01  | 10.49 | 989   | 10.03 | 8.03  | 904    | 105.25 | 42.38  | 904    | 1.37 | 0.88  |       |      |      |
|           | MESA                 | 1345  | 29.74 | 5.77  | 1345  | 0.91 | 0.08  | 1339  | 90.13  | 10.83 | 1336  | 9.84  | 5.92  | 1335   | 122.97 | 97.94  | 1335   | 2.24 | 1.51  | 1168  | 5.56 | 0.44 |
| WHI       | 8116                 | 31.03 | 6.50  | 8088  | 0.82  | 0.07 | 5514  | 91.84 | 9.98   | 5364  | 8.94  | 5.64  | 5357  | 104.34 | 66.04  | 5366   | 2.08   | 1.46 |       |       |      |      |
| Asian     | MESA                 | 672   | 23.83 | 3.2   | 672   | 0.91 | 0.07  | 670   | 91.47  | 9.78  | 671   | 8.91  | 4.61  | 669    | 108.54 | 64.67  | 669    | 2.03 | 1.13  | 605   | 5.51 | 0.37 |
|           | TUDR                 | 895   | 24.75 | 4.33  | 168   | 0.93 | 0.05  |       |        |       |       |       |       |        |        |        |        |      | 835   | 8.88  | 2.47 |      |
| Hispanic  | HCHS-SOL             | 10120 | 29.73 | 5.71  | 9013  | 0.92 | 0.07  | 8108  | 94.64  | 8.79  | 8071  | 12.23 | 8.50  | 8077   | 128.86 | 86.01  | 8073   | 2.91 | 2.16  | 8106  | 5.46 | 0.38 |
|           | MESA                 | 1187  | 29.04 | 4.88  | 1187  | 0.95 | 0.07  | 1185  | 90.78  | 10.86 | 1185  | 11.03 | 14.24 | 1184   | 135.77 | 129.6  | 1184   | 2.54 | 3.89  | 1063  | 5.49 | 0.41 |
|           | WHI                  | 3463  | 28.76 | 5.36  | 3448  | 0.82 | 0.07  | 2623  | 91.55  | 8.88  | 2572  | 8.22  | 5.45  | 2568   | 95.55  | 60.25  | 2572   | 1.90 | 1.39  |       |      |      |
| Brazilian | PELOTAS              | 1925  | 26.92 | 5.59  | 1943  | 0.82 | 0.08  |       |        |       |       |       |       |        |        |        |        |      | 1921  | 5.09  | 0.43 |      |

**Table S2(a,b).** Details by Cohort of\_mtDNA Variants Associated with BMI, WHR, Glucose, Insulin, HOMA-B, HOMA-IR and HbA1c METAL Meta-Analysis **Single Variant Results**

a. Meta-analysis results of variants with MAF > 1% (see Table 1.a) including information at the cohort level selected with MAC  $\geq$  5.

| No | Results          | Pos   | rsID       | Gene    | Annotation | Trait | Ancestry | A1/2 | Freq1  | MAF    | MAC | INFO  | $\beta$ (SE) | P-value         | Dir   | Het-P    | N      | Missing Rate |
|----|------------------|-------|------------|---------|------------|-------|----------|------|--------|--------|-----|-------|--------------|-----------------|-------|----------|--------|--------------|
| 1  | Metal            | 8706  |            | MT-ATP6 |            | WHR   | PA       | A/G  | 0.9676 | 0.0324 | 834 | n.a.  | -0.13(0.04)  | <b>4.07E-04</b> | ---+  | 9.44E-02 | 25,748 | n.a.         |
|    | ALSPAC.EA        |       |            |         |            |       |          |      | 0.9974 | 0.0026 | 14  | 0.816 | -0.40(0.26)  | 1.27E-01        | 5,303 | 0.00000  |        |              |
|    | SOL.HA           |       |            |         |            |       |          |      | 0.9880 | 0.0120 | 108 | 0.960 | -0.32(0.10)  | 8.05E-04        | 8,989 | 0.00266  |        |              |
|    | WHI.AA           |       |            |         |            |       |          |      | 0.9135 | 0.0865 | 693 | 0.968 | -0.09(0.04)  | 2.10E-02        | 8,011 | 0.00952  |        |              |
|    | WHI.HA           |       |            |         |            |       |          |      | 0.9945 | 0.0055 | 19  | 0.447 | 0.01(0.23)   | 9.68E-01        | 3,445 | 0.00087  |        |              |
| 2  | Metal            | 16320 | rs62581338 | D-loop  |            | GLUC  | PA       | T/C  | 0.0158 | 0.0158 | 301 | n.a.  | -0.21(0.05)  | <b>7.59E-05</b> | --++  | 1.77E-01 | 19,046 | n.a.         |
|    | FENLAND.EA       |       |            |         |            |       |          |      | 0.0028 | 0.0028 | 23  | 0.432 | -0.13(0.10)  | 2.19E-01        | 8,209 | 0.02300  |        |              |
|    | GOYA_CASES.EA    |       |            |         |            |       |          |      | 0.2439 | 0.2439 | 40  | 1.000 | -0.36(0.18)  | 5.24E-02        | 164   | 0.00000  |        |              |
|    | GOYA_CONTROLS.EA |       |            |         |            |       |          |      | 0.2402 | 0.2402 | 61  | 1.000 | 0.01(0.15)   | 9.63E-01        | 254   | 0.00000  |        |              |
|    | SOL.HA           |       |            |         |            |       |          |      | 0.0195 | 0.0195 | 153 | 0.791 | -0.33(0.08)  | 4.63E-05        | 7,849 | 0.03194  |        |              |
|    | WHI.HA           |       |            |         |            |       |          |      | 0.0093 | 0.0093 | 24  | 0.704 | -0.05(0.21)  | 8.19E-01        | 2,570 | 0.01908  |        |              |

Footnotes: No-order number; Pos - MT position in bps; Gene- gene name or region; rsID - rsID-name from NCBI dbSNP database when available; Annotation - role of the variants when available; Trait - one or more of seven traits studied; Ancestry – AA – African Americans, EA – European, HA- Hispanics or Latino, and PA - Pan-ancestry; A1/2 - the coded and non-coded alleles; Freq1 - allele frequency for coded allele; FreqSE - Standard error of allele frequency from METAL; MINFreq - a minimum allele frequency for contributing cohorts; MAXFreq - a maximum allele frequency for contributing cohorts; MAF - minor allele frequency; MAC - minor allele count, calculated as MAF\*N;  $\beta$ (SE) - beta coefficient and the corresponding standard error; P-value - from single variant regression analysis; Dir - direction sign of contributing cohort's beta; Het-P - heterogeneity P-value test from METAL; N - individuals' sample contributing in a particular marker meta-analysis.

**b. Meta-analysis results of variants with MAF < 1% (see Table 1.b) including information at the cohort level selected with MAC ≥ 5.**

| No | Results   | Pos   | rsID        | Gene    | Annotation | Trait | Ancestry | A1/2 | Freq1  | MAF    | MAC | INFO  | β(SE)       | P-value         | Dir  | Het-P    | N       | Missing Rate |
|----|-----------|-------|-------------|---------|------------|-------|----------|------|--------|--------|-----|-------|-------------|-----------------|------|----------|---------|--------------|
| 1  | Metal     | 8896  | rs202120082 | MT-ATP6 | missense   | WHR   | PA       | A/G  | 0.0038 | 0.0038 | 134 | n.a.  | 0.30(0.08)  | <b>1.12E-04</b> | ++++ | 8.80E-01 | 34,959  | n.a.         |
|    | ALSPAC.EA |       |             |         |            |       |          |      | 0.0026 | 0.0026 | 14  | 0.821 | 0.40(0.26)  | 1.27E-01        |      | 5,303    | 0.00000 |              |
|    | MESA.HA   |       |             |         |            |       |          |      | 0.0059 | 0.0059 | 6   | 1.000 | 0.28(0.23)  | 2.20E-01        |      | 1,075    | 0.00000 |              |
|    | SOL.HA    |       |             |         |            |       |          |      | 0.0121 | 0.0121 | 109 | 1.000 | 0.32(0.10)  | 7.66E-04        |      | 9,013    | 0.00000 |              |
|    | WGHS.EA   |       |             |         |            |       |          |      | 0.0003 | 0.0003 | 5   | 1.000 | 0.15(0.22)  | 5.09E-01        |      | 19,568   | 0.00000 |              |
| 2  | Metal     | 14124 |             | MT-ND5  |            | INS   | PA       | T/C  | 0.0035 | 0.0035 | 21  | n.a.  | 0.57(0.16)  | <b>2.95E-04</b> | +++  | 1.62E-01 | 6,035   | n.a.         |
|    | ALSPAC.EA |       |             |         |            |       |          |      | 0.0022 | 0.0022 | 6   | 0.995 | 0.43(0.38)  | 2.51E-01        |      | 2,767    | 0.00037 |              |
|    | ARIC.AA   |       |             |         |            |       |          |      | 0.0035 | 0.0035 | 9   | 0.948 | 1.09(0.32)  | 5.80E-04        |      | 2,581    | 0.00070 |              |
|    | GENOA.AA  |       |             |         |            |       |          |      | 0.0087 | 0.0087 | 6   | 0.999 | 0.38(0.20)  | 5.97E-02        |      | 687      | 0.00000 |              |
| 3  | Metal     | 14272 | rs2853814   | MT-ND6  | missense   | BMI   | PA       | T/C  | 0.0012 | 0.0012 | 17  | n.a.  | 0.84(0.24)  | <b>4.90E-04</b> | ++   | 6.49E-01 | 13,636  | n.a.         |
|    | ALSPAC.EA |       |             |         |            |       |          |      | 0.0022 | 0.0022 | 8   | 0.994 | 0.73(0.35)  | 3.99E-02        |      | 3,628    | 0.00037 |              |
|    | SOL.HA    |       |             |         |            |       |          |      | 0.0009 | 0.0009 | 9   | 0.469 | 0.95(0.33)  | 4.38E-03        |      | 10,008   | 0.01107 |              |
| 4  | Metal     | 14353 |             | MT-ND6  |            | WHR   | PA       | T/C  | 0.9916 | 0.0084 | 120 | n.a.  | -0.33(0.09) | <b>2.29E-04</b> | --   | 8.00E-01 | 14,315  | n.a.         |
|    | ALSPAC.EA |       |             |         |            |       |          |      | 0.9978 | 0.0022 | 12  | 0.994 | -0.40(0.26) | 1.27E-01        |      | 5,303    | 0.00037 |              |
|    | SOL.HA    |       |             |         |            |       |          |      | 0.9880 | 0.0120 | 108 | 0.967 | -0.33(0.10) | 7.75E-04        |      | 9,012    | 0.00011 |              |
| 5  | Metal     | 14584 |             | MT-ND6  |            | BMI   | PA       | T/C  | 0.9988 | 0.0012 | 17  | n.a.  | -0.84(0.24) | <b>4.90E-04</b> | --   | 6.49E-01 | 13,636  | n.a.         |
|    | ALSPAC.EA |       |             |         |            |       |          |      | 0.9978 | 0.0022 | 8   | 0.994 | -0.73(0.35) | 3.99E-02        |      | 3,628    | 0.00037 |              |
|    | SOL.HA    |       |             |         |            |       |          |      | 0.9991 | 0.0009 | 9   | 0.469 | -0.95(0.33) | 4.38E-03        |      | 10,008   | 0.01107 |              |

**Table S3.** Association Results at Cohort Level for SOL-HA.

| No | POS   | rsID        | Trait | Ancestry         | A1 | A2 | Freq1    | MAF      | $\beta$ | SE   | P-value  | N    | missRate |    |
|----|-------|-------------|-------|------------------|----|----|----------|----------|---------|------|----------|------|----------|----|
| 1* | 8706  |             | WHR   | Central American | A  | G  | 0.924361 | 0.075639 | -0.26   | 0.12 | 2.68E-02 | 1018 | 0.00196  |    |
|    |       |             |       | Cuban            | A  | G  | 0.992486 | 0.007514 | -0.46   | 0.29 | 1.11E-01 | 1730 | 0.00518  |    |
|    |       |             |       | Dominican        | NA | NA | NA       | NA       | NA      | NA   | NA       | NA   | NA       | NA |
|    |       |             |       | Mexican          | A  | G  | 0.996458 | 0.003542 | -0.46   | 0.29 | 1.13E-01 | 3106 | 0.00064  |    |
|    |       |             |       | Puerto Rican     | NA | NA | NA       | NA       | NA      | NA   | NA       | NA   | NA       | NA |
|    |       |             |       | South American   | A  | G  | 0.989766 | 0.010234 | -0.93   | 0.37 | 1.24E-02 | 684  | 0.00437  |    |
| 2  | 16320 | rs62581338  | GLUC  | Central American | C  | T  | 0.994536 | 0.005464 | -0.04   | 0.41 | 9.23E-01 | 915  | 0.01719  |    |
|    |       |             |       | Cuban            | C  | T  | 0.950067 | 0.049933 | 0.31    | 0.12 | 8.57E-03 | 1502 | 0.06125  |    |
|    |       |             |       | Dominican        | C  | T  | 0.958032 | 0.041968 | 0.47    | 0.19 | 1.30E-02 | 691  | 0.07989  |    |
|    |       |             |       | Mexican          | C  | T  | 0.995448 | 0.004552 | 0.17    | 0.28 | 5.46E-01 | 2856 | 0.00626  |    |
|    |       |             |       | Puerto Rican     | C  | T  | 0.982595 | 0.017405 | 0.27    | 0.23 | 2.47E-01 | 1264 | 0.04242  |    |
|    |       |             |       | South American   | C  | T  | 0.985507 | 0.014493 | 0.73    | 0.32 | 2.21E-02 | 621  | 0.01741  |    |
| No | POS   | rsID        | Trait | Ancestry         | A1 | A2 | A1_AF    | MAF      | $\beta$ | SE   | P-value  | N    | missRate |    |
| 1  | 8896  | rs202120082 | WHR   | Central American | G  | A  | 0.923529 | 0.076471 | -0.26   | 0.11 | 2.59E-02 | 1020 | 0.00000  |    |
|    |       |             |       | Cuban            | G  | A  | 0.992524 | 0.007476 | -0.46   | 0.29 | 1.09E-01 | 1739 | 0.00000  |    |
|    |       |             |       | Dominican        | NA | NA | NA       | NA       | NA      | NA   | NA       | NA   | NA       |    |
|    |       |             |       | Mexican          | G  | A  | 0.996461 | 0.003539 | -0.46   | 0.29 | 1.13E-01 | 3108 | 0.00000  |    |
|    |       |             |       | Puerto Rican     | NA | NA | NA       | NA       | NA      | NA   | NA       | NA   | NA       |    |
|    |       |             |       | South American   | G  | A  | 0.989811 | 0.010189 | -0.93   | 0.37 | 1.24E-02 | 687  | 0.00000  |    |
| 3  | 14272 | rs2853814   | BMI   | Central American | NA | NA | NA       | NA       | NA      | NA   | NA       | NA   | NA       |    |
|    |       |             |       | Cuban            | C  | T  | 0.998395 | 0.001605 | 0.33    | 0.57 | 5.64E-01 | 1869 | 0.02351  |    |
|    |       |             |       | Dominican        | C  | T  | 0.998881 | 0.001119 | -2.63   | 0.96 | 6.61E-03 | 894  | 0.02826  |    |
|    |       |             |       | Mexican          | NA | NA | NA       | NA       | NA      | NA   | NA       | NA   | NA       |    |
|    |       |             |       | Puerto Rican     | C  | T  | 0.997762 | 0.002238 | -1.34   | 0.56 | 1.79E-02 | 1787 | 0.00887  |    |
|    |       |             |       | South American   | C  | T  | 0.998628 | 0.001372 | -1.74   | 0.90 | 5.22E-02 | 729  | 0.00410  |    |
| 4  | 14353 |             | WHR   | Central American | T  | C  | 0.924436 | 0.075564 | -0.26   | 0.12 | 2.66E-02 | 1019 | 0.00098  |    |
|    |       |             |       | Cuban            | T  | C  | 0.992524 | 0.007476 | -0.46   | 0.29 | 1.09E-01 | 1739 | 0.00000  |    |
|    |       |             |       | Dominican        | NA | NA | NA       | NA       | NA      | NA   | NA       | NA   | NA       |    |
|    |       |             |       | Mexican          | T  | C  | 0.996461 | 0.003539 | -0.46   | 0.29 | 1.13E-01 | 3108 | 0.00000  |    |
|    |       |             |       | Puerto Rican     | NA | NA | NA       | NA       | NA      | NA   | NA       | NA   | NA       |    |
|    |       |             |       | South American   | T  | C  | 0.989811 | 0.010189 | -0.93   | 0.37 | 1.24E-02 | 687  | 0.00000  |    |
| 5  | 14584 |             | BMI   | Central American | NA | NA | NA       | NA       | NA      | NA   | NA       | NA   | NA       |    |
|    |       |             |       | Cuban            | T  | C  | 0.998395 | 0.001605 | 0.33    | 0.57 | 5.64E-01 | 1869 | 0.02351  |    |
|    |       |             |       | Dominican        | T  | C  | 0.998881 | 0.001119 | -2.63   | 0.96 | 6.61E-03 | 894  | 0.02826  |    |
|    |       |             |       | Mexican          | NA | NA | NA       | NA       | NA      | NA   | NA       | NA   | NA       |    |
|    |       |             |       | Puerto Rican     | T  | C  | 0.997762 | 0.002238 | -1.34   | 0.56 | 1.79E-02 | 1787 | 0.00887  |    |
|    |       |             |       | South American   | T  | C  | 0.998628 | 0.001372 | -1.74   | 0.90 | 5.22E-02 | 729  | 0.00410  |    |

**Footnote:** \*These order numbers match with the ones on Tables 1.a-1.b and Tables S2.a-2.b.

**Table S4.** GWAS Publications, which Summary Results Were Used for Identifying Significant MT-nDNA Candidate Genes

| <b>BMI</b>                     |                |                                                                                                                                                                                                                                                                               |
|--------------------------------|----------------|-------------------------------------------------------------------------------------------------------------------------------------------------------------------------------------------------------------------------------------------------------------------------------|
| Author(s)                      | PMID           | Publication                                                                                                                                                                                                                                                                   |
| Speliotes <i>et al.</i> , 2010 | PMID: 20935630 | Speliotes, E.K. <i>et al.</i> Association analyses of 249,796 individuals reveal 18 new loci associated with body mass index. <i>Nat Genet</i> <b>42</b> , 937-48 (2010).                                                                                                     |
| Yang <i>et al.</i> , 2012      | PMID: 22982992 | Yang, J. <i>et al.</i> FTO genotype is associated with phenotypic variability of body mass index. <i>Nature</i> <b>490</b> , 267-72 (2012).                                                                                                                                   |
| Berndt <i>et al.</i> , 2013    | PMID: 23563607 | Berndt, S.I. <i>et al.</i> Genome-wide meta-analysis identifies 11 new loci for anthropometric traits and provides insights into genetic architecture. <i>Nat Genet</i> <b>45</b> , 501-12 (2013).                                                                            |
| Randall <i>et al.</i> , 2013   | PMID: 23754948 | Randall, J.C. <i>et al.</i> Sex-stratified genome-wide association studies including 270,000 individuals show sexual dimorphism in genetic loci for anthropometric traits. <i>PLoS Genet</i> <b>9</b> , e1003500 (2013).                                                      |
| Monda <i>et al.</i> , 2013     | PMID: 23583978 | Monda, K.L. <i>et al.</i> A meta-analysis identifies new loci associated with body mass index in individuals of African ancestry. <i>Nat Genet</i> <b>45</b> , 690-6 (2013).                                                                                                  |
| Locke <i>et al.</i> , 2015     | PMID: 25673413 | Locke, A.E. <i>et al.</i> Genetic studies of body mass index yield new insights for obesity biology. <i>Nature</i> <b>518</b> , 197-206 (2015).                                                                                                                               |
| Shungin <i>et al.</i> , 2015   | PMID: 25673412 | Shungin, D. <i>et al.</i> New genetic loci link adipose and insulin biology to body fat distribution. <i>Nature</i> <b>518</b> , 187-196 (2015).                                                                                                                              |
| Winkler <i>et al.</i> , 2015   | PMID: 26426971 | Winkler, T.W. <i>et al.</i> The Influence of Age and Sex on Genetic Associations with Adult Body Size and Shape: A Large-Scale Genome-Wide Interaction Study. <i>PLoS Genet</i> <b>11</b> , e1005378 (2015).                                                                  |
| NG <i>et al.</i> , 2017        | PMID: 28430825 | Ng, M.C.Y. <i>et al.</i> Discovery and fine-mapping of adiposity loci using high density imputation of genome-wide association studies in individuals of African ancestry: African Ancestry Anthropometry Genetics Consortium. <i>PLoS Genet</i> <b>13</b> , e1006719 (2017). |
| Justice <i>et al.</i> , 2017   | PMID: 28443625 | Justice, A.E. <i>et al.</i> Genome-wide meta-analysis of 241,258 adults accounting for smoking behaviour identifies novel loci for obesity traits. <i>Nat Commun</i> <b>8</b> , 14977 (2017).                                                                                 |
| <b>WHR</b>                     |                |                                                                                                                                                                                                                                                                               |
| Heid <i>et al.</i> , 2010      | PMID: 20935629 | Heid, I.M. <i>et al.</i> Meta-analysis identifies 13 new loci associated with waist-hip ratio and reveals sexual dimorphism in the genetic basis of fat distribution. <i>Nat Genet</i> <b>42</b> , 949-60 (2010).                                                             |

|                                 |                |                                                                                                                                                                                                                                                                                |
|---------------------------------|----------------|--------------------------------------------------------------------------------------------------------------------------------------------------------------------------------------------------------------------------------------------------------------------------------|
| Randall <i>et al</i> , 2013     | PMID: 23754948 | Randall, J.C. <i>et al</i> . Sex-stratified genome-wide association studies including 270,000 individuals show sexual dimorphism in genetic loci for anthropometric traits. <i>PLoS Genet</i> <b>9</b> , e1003500 (2013).                                                      |
| Berndt <i>et al</i> , 2013      | PMID: 23563607 | Berndt, S.I. <i>et al</i> . Genome-wide meta-analysis identifies 11 new loci for anthropometric traits and provides insights into genetic architecture. <i>Nat Genet</i> <b>45</b> , 501-12 (2013).                                                                            |
| Shungin <i>et al</i> , 2015     | PMID: 25673412 | Shungin, D. <i>et al</i> . New genetic loci link adipose and insulin biology to body fat distribution. <i>Nature</i> <b>518</b> , 187-196 (2015).                                                                                                                              |
| Winkler <i>et al</i> , 2015     | PMID: 26426971 | Winkler, T.W. <i>et al</i> . The Influence of Age and Sex on Genetic Associations with Adult Body Size and Shape: A Large-Scale Genome-Wide Interaction Study. <i>PLoS Genet</i> <b>11</b> , e1005378 (2015).                                                                  |
| Justice <i>et al</i> , 2017     | PMID: 28443625 | Justice, A.E. <i>et al</i> . Genome-wide meta-analysis of 241,258 adults accounting for smoking behaviour identifies novel loci for obesity traits. <i>Nat Commun</i> <b>8</b> , 14977 (2017).                                                                                 |
| NG <i>et al</i> , 2017          | PMID: 28430825 | Ng, M.C.Y. <i>et al</i> . Discovery and fine-mapping of adiposity loci using high density imputation of genome-wide association studies in individuals of African ancestry: African Ancestry Anthropometry Genetics Consortium. <i>PLoS Genet</i> <b>13</b> , e1006719 (2017). |
| Graph <i>et al</i> , 2017       | PMID: 28448500 | Graff, M. <i>et al</i> . Genome-wide physical activity interactions in adiposity - A meta-analysis of 200,452 adults. <i>PLoS Genet</i> <b>13</b> , e1006528 (2017).                                                                                                           |
| <b>Glucose</b>                  |                |                                                                                                                                                                                                                                                                                |
| Saxena <i>et al</i> , 2010      | PMID:20081857  | Saxena, R. <i>et al</i> . Genetic variation in GIPR influences the glucose and insulin responses to an oral glucose challenge. <i>Nat Genet</i> <b>42</b> , 142-8 (2010).                                                                                                      |
| Dupuis <i>et al</i> , 2010      | PMID:20081858  | Dupuis, J. <i>et al</i> . New genetic loci implicated in fasting glucose homeostasis and their impact on type 2 diabetes risk. <i>Nat Genet</i> <b>42</b> , 105-16 (2010).                                                                                                     |
| Manning <i>et al</i> , 2010     | PMID:22581228  | Manning, A.K. <i>et al</i> . A genome-wide approach accounting for body mass index identifies genetic variants influencing fasting glycemic traits and insulin resistance. <i>Nat Genet</i> <b>44</b> , 659-69 (2012).                                                         |
| Scott <i>et al</i> , 2012       | PMID:22885924  | Scott, R.A. <i>et al</i> . Large-scale association analyses identify new loci influencing glycemic traits and provide insight into the underlying biological pathways. <i>Nat Genet</i> <b>44</b> , 991-1005 (2012).                                                           |
| <b>INS</b>                      |                |                                                                                                                                                                                                                                                                                |
| Dupuis <i>et al</i> , 2010      | PMID:20081858  | Dupuis, J. <i>et al</i> . New genetic loci implicated in fasting glucose homeostasis and their impact on type 2 diabetes risk. <i>Nat Genet</i> <b>42</b> , 105-16 (2010).                                                                                                     |
| Strawbridge <i>et al</i> , 2011 | PMID: 21873549 | Strawbridge, R.J. <i>et al</i> . Genome-wide association identifies nine common variants associated with fasting proinsulin levels and provides new insights into the pathophysiology of type 2 diabetes. <i>Diabetes</i> <b>60</b> , 2624-34.                                 |

|                                |                |                                                                                                                                                                                                                                                    |
|--------------------------------|----------------|----------------------------------------------------------------------------------------------------------------------------------------------------------------------------------------------------------------------------------------------------|
| Manning <i>et al</i> , 2010    | PMID:22581228  | Manning, A.K. <i>et al</i> . A genome-wide approach accounting for body mass index identifies genetic variants influencing fasting glycemic traits and insulin resistance. <i>Nat Genet</i> <b>44</b> , 659-69 (2012).                             |
| Scott <i>et al</i> , 2012      | PMID:22885924  | Scott, R.A. <i>et al</i> . Large-scale association analyses identify new loci influencing glycemic traits and provide insight into the underlying biological pathways. <i>Nat Genet</i> <b>44</b> , 991-1005 (2012).                               |
| Prokopenko <i>et al</i> , 2014 | PMID:24699409  | Prokopenko, I. <i>et al</i> . A central role for GRB10 in regulation of islet function in man. <i>PLoS Genet</i> <b>10</b> , e1004235 (2014).                                                                                                      |
| Walford <i>et al</i> , 2016    | PMID: 27416945 | Walford, <i>et al</i> . Genome-Wide Association Study of the Modified Stumvoll Insulin Sensitivity Index Identifies BCL2 and FAM19A2 as Novel Insulin Sensitivity Loci. <i>Diabetes</i> <b>65</b> , 3200-11 (2016)                                 |
| <b>HOMAB</b>                   |                |                                                                                                                                                                                                                                                    |
| Dupuis <i>et al</i> , 2010     | PMID:20081858  | Dupuis, J. <i>et al</i> . New genetic loci implicated in fasting glucose homeostasis and their impact on type 2 diabetes risk. <i>Nat Genet</i> <b>42</b> , 105-16 (2010).                                                                         |
| <b>HOMA1R</b>                  |                |                                                                                                                                                                                                                                                    |
| Dupuis <i>et al</i> , 2010     | PMID:20081858  | Dupuis, J. <i>et al</i> . New genetic loci implicated in fasting glucose homeostasis and their impact on type 2 diabetes risk. <i>Nat Genet</i> <b>42</b> , 105-16 (2010).                                                                         |
| <b>HbA1c</b>                   |                |                                                                                                                                                                                                                                                    |
| Soranzo <i>et al</i> , 2010    | PMID:20858683  | Soranzo N. <i>et al</i> . Common variants at 10 genomic loci influence hemoglobin A <sub>1c</sub> levels via glycemic and nonglycemic pathways. <i>Diabetes</i> <b>59</b> ,3229-39 (2010)                                                          |
| Wheeler <i>et al</i> , 2017    | PMID:28898252  | Wheeler, E. <i>et al</i> . Impact of common genetic determinants of Hemoglobin A1c on type 2 diabetes risk and diagnosis in ancestrally diverse populations: A transethnic genome-wide meta-analysis. <i>PLoS Med</i> <b>14</b> , e1002383 (2017). |

**Table S5.** Domain Terms (in Pathways and Metabolism-MeSH) Enriched for MT-nDNA Gene Clusters and their Assigned Abstracts in Percent

| Estrogen signaling                                                                                                                     | Antisense                            | RNA polymerase                                                               | Angiogenesis      | IGFR-1R                                                  | Mitochondrial Carnitine Palmitoyltransferase                                                                  | PPAR                    |
|----------------------------------------------------------------------------------------------------------------------------------------|--------------------------------------|------------------------------------------------------------------------------|-------------------|----------------------------------------------------------|---------------------------------------------------------------------------------------------------------------|-------------------------|
| BCL2,TNF,VEGFA,IGF1,IGF1R,ESR1,B3GNTL1,FGF2,PPARG,BDNF,RAF1,CD<br>ESR1, IGF1                                                           | H1,GJA1,NUDT6,POMC,FOXO1,TUT1        | TNF,VEGFA,BCL2,ESR1,PPARG,CDH1,IGF1,FGF2,B3GNTL1,IGF1R,BDNF,DNASE1,GJA1,POMC | VEGFA,FGF2        | IGF1R,IGF1                                               | CPT1A, TOP1, PPARG                                                                                            | PPARG, NRH1             |
| 97,1                                                                                                                                   | 24,15,10,5,5,4,4,4,4,3,3,3,2,1,1,1,1 | 24,12,11,8,7,4,4,4,3,3,3,2,2,1,1                                             | 93,6              | 88,12                                                    | 66,31,2                                                                                                       | 98,1                    |
| 0.0003                                                                                                                                 | 0.0005                               | 0.0005                                                                       | 0.001             | 0.0011                                                   | 0.0011                                                                                                        | 0.0015                  |
| Tissue distribution                                                                                                                    | Pentose phosphate pathway            | Glycolysis                                                                   | Cytric Acid cycle | Carbohydrate metabolisn                                  | Metabolome                                                                                                    | Lipogenesis             |
| POMC,B3GNTL1,ESR1,TSPO,TNF,IGF1,VEGFA,PPARG,FGF2,BDNF,GJA1,APOE,IGF1R,SLC25A26,AKR1A1,DNASE1,CDH1,MAP2,MC4R,CD46,HK1,BCL2,SLC2A2,BCKDK | G6PD,PFKM,HK1                        | HK1,PFKM,GCK,G6PD                                                            | OGDH,HK1,G6PD     | HK1,PFKM,G6PD,GCK,B3GNTL1,AKR1A1,FOXO1,PPARG,SLC2A2,OGDH | HK1,CPS1,LPCAT3,CPT1A,G6PD,PPARG,OGDH,CRTC1,PFKM,CYP17A1,MTCH2,TNF,DNLZ,FADS1,IGF1,LRPPRC,PEMT,GCK,ATXN1,APOE | PPARG,NR1H3,CPT1A,FOXO1 |
| 14,10,8,7,5,5,4,3,3,3,3,2,2,2,1,1,1,1,1,1,1,1                                                                                          | 89,6,4                               | 59,28,7,3                                                                    | 95,3,1            | 47,16,11,9,6,3,2,1,1,1                                   | 13,12,10,9,8,7,6,4,3,2,2,2,2,2,2,1,1,1                                                                        | 89,5,2,1                |
| 0.0041                                                                                                                                 | 0.005                                | 0.0054                                                                       | 0.0071            | 0.0077                                                   | 0.0097                                                                                                        | 0.0126                  |

**Table S6.** Functional Annotation of 109 MT-nDNA Candidate Genes (Separate Excel Worksheet)

**Table S7.** Thirteen and Fifteen Genes out of 109 MT-nDNA Candidates Associated Respectively with T2D and CVD



| No | Gene          | Mapping  | T2D Association Candidates: Function                                                                                                                                                                                                                                 | Trait                          | P-value  | PMID     |
|----|---------------|----------|----------------------------------------------------------------------------------------------------------------------------------------------------------------------------------------------------------------------------------------------------------------------|--------------------------------|----------|----------|
| 1  | <i>ATXN2</i>  | 12q24.12 | It is involved in endocytosis, and modulates mTOR signals, modifying ribosomal translation and mitochondrial function. GWAs indicate that loss-of-function mutations in this gene may be associated with susceptibility to type I diabetes, obesity and hypertension | Glycated hemoglobin levels     | 1.0E-08  | 28898252 |
| 2  | <i>BCL2</i>   | 18q21.33 | An integral outer mitochondrial membrane protein that blocks the apoptotic death of some cells such as lymphocytes                                                                                                                                                   | Type 2 diabetes                | 4.0E-08  | 28869590 |
| 3  | <i>CPS1</i>   | 2q34     | The mitochondrial enzyme encoded by this gene catalyzes synthesis of carbamoyl phosphate from ammonia and bicarbonate                                                                                                                                                | Metabolite levels              | 3.0E-50  | 23378610 |
| 4  | <i>ERAL1</i>  | 17q11.2  | It is required for proper assembly of the 28S small mitochondrial ribosomal subunit                                                                                                                                                                                  | Glycated hemoglobin levels     | 3.0E-11  | 28898252 |
| 5  | <i>FADS1</i>  | 11q12.2  | Regulates unsaturation of fatty acids through the introduction of double bonds between defined carbons of the fatty acyl chain                                                                                                                                       | Fasting glucose related traits | 2.0E-15  | 20081858 |
| 6  | <i>G6PD</i>   | Xq28     | Glucose-6-phosphate dehydrogenase produces NADPH, a key electron donor in the defense against oxidizing agents and in reductive biosynthetic reactions                                                                                                               | Glycated hemoglobin levels     | 8.0E-135 | 28898252 |
| 7  | <i>HFE</i>    | 6p22.2   | Iron regulator, associates with beta2-microglobulin                                                                                                                                                                                                                  | Glycated hemoglobin levels     | 5.0E-28  | 28898252 |
| 8  | <i>HK1</i>    | 10q22.1  | Hexokinases phosphorylate glucose to produce glucose-6-phosphate, the first step in most glucose metabolism pathways                                                                                                                                                 | Glycated hemoglobin levels     | 3.0E-65  | 28898252 |
| 9  | <i>IGF1</i>   | 12q23.2  | It is similar to insulin in function and structure and is involved in mediating growth and development                                                                                                                                                               | HOMA-IR                        | 2.0E-09  | 20081858 |
| 10 | <i>PHB2</i>   | 12p13.31 | PHB2 plays a central role in p21 upregulation following GGCT knockdown and as such may promote deregulated proliferation of cancer                                                                                                                                   | Glycated hemoglobin levels     | 4.0E-08  | 28898252 |
| 11 | <i>PPARG</i>  | 3p25.2   | It is a regulator of adipocyte differentiation.                                                                                                                                                                                                                      | T2D                            | 2.0E-19  | 28869590 |
| 12 | <i>SLC2A2</i> | 3q26.2   | Known also as GLUT2: The encoded protein mediates facilitated bidirectional glucose transport. Because of its low affinity for glucose, it has been suggested as a glucose sensor                                                                                    | HbA1c reduction in T2D         | 7.0E-14  | 27500523 |
| 13 | <i>WFS1</i>   | 4p16.1   | Down-regulation of WFS1 in neurons leads to changes in mitochondrial dynamics (inhibited mitochondrial fusion, altered mitochondrial trafficking, and augmented mitophagy), delaying neuronal development                                                            | T2D                            | 1.0E-15  | 28869590 |

| No | Gene          | Mapping  | CVD Association Candidates: Function                                                                                                                                                                                                                                                                                                      | Trait                    | P-value  | PMID     |
|----|---------------|----------|-------------------------------------------------------------------------------------------------------------------------------------------------------------------------------------------------------------------------------------------------------------------------------------------------------------------------------------------|--------------------------|----------|----------|
| 1  | <i>APOE</i>   | 19q13.32 | It is essential for the normal catabolism of triglyceride-rich lipoprotein constituents. Mutations in this gene result in familial dysbetalipoproteinemia, or type III hyperlipoproteinemia (HLP III), in which increased plasma cholesterol and triglycerides are the consequence of impaired clearance of chylomicron and VLDL remnants | LDL                      | 2.0E-286 | 28334899 |
| 2  | <i>ATXN2</i>  | 12q24.12 | It is involved in endocytosis, and modulates mTOR signals, modifying ribosomal translation and mitochondrial function                                                                                                                                                                                                                     | Coronary artery disease  | 9.0E-14  | 28714975 |
| 3  | <i>CD46</i>   | 1q32.2   | The encoded protein has cofactor activity for inactivation of complement components C3b and C4b by serum factor I, which protects the host cell from damage by complement                                                                                                                                                                 | Resting heart rate       | 5.0E-31  | 27798624 |
| 4  | <i>CPS1</i>   | 2q34     | This mitochondrial enzyme catalyzes synthesis of carbamoyl phosphate from ammonia and bicarbonate. This reaction is the first committed step of the urea cycle, which is important in the removal of excess urea from cells                                                                                                               | Fibrinogen               | 2.0E-11  | 23969696 |
| 5  | <i>ESR1</i>   | 6q25.1   | The estrogen receptor is a ligand-activated transcription factor composed of several domains important for hormone binding, DNA binding, and                                                                                                                                                                                              | Pulse pressure           | 2.0E-18  | 28135244 |
| 6  | <i>FADS1</i>  | 11q12.2  | Desaturase enzymes regulate unsaturation of fatty acids through the introduction of double bonds between defined carbons of the fatty acyl chain                                                                                                                                                                                          | LDL                      | 2.0E-39  | 24097068 |
| 7  | <i>FEN1</i>   | 11q12.2  | Structure-specific nuclease with 5-flap endonuclease and 5-3 exonuclease activities involved in DNA replication and repair                                                                                                                                                                                                                | Trans fatty acid levels  | 5.0E-13  | 25646338 |
| 8  | <i>FHIT</i>   | 3p14.2   | The protein encoded by this gene is a P1-P3-bis(5'-adenosyl) triphosphate hydrolase involved in purine metabolism                                                                                                                                                                                                                         | Major coronary event     | 3.0E-08  | 28753643 |
| 9  | <i>FUNDC2</i> | Xq28     | Ubiquitous expression in heart (RPKM 26.0)                                                                                                                                                                                                                                                                                                | Thrombosis               | 7.0E-13  | 26908601 |
| 10 | <i>GJAI</i>   | 6q22.31  | The encoded protein is the major protein of gap junctions in the heart that are thought to have a crucial role in the synchronized contraction of the heart and in embryonic development.                                                                                                                                                 | Resting heart rate       | 3.0E-17  | 27798624 |
| 11 | <i>HFE</i>    | 6p22.2   | The protein encoded by this gene is a membrane protein that is similar to MHC class I-type proteins and associates with beta2-microglobulin (beta2M)                                                                                                                                                                                      | Diastolic blood pressure | 2.0E-15  | 21909115 |

| No | Gene           | Mapping  | CVD Association Candidates: Function                                                                                                                                                                                                                  | Trait                    | P-value | PMID     |
|----|----------------|----------|-------------------------------------------------------------------------------------------------------------------------------------------------------------------------------------------------------------------------------------------------------|--------------------------|---------|----------|
| 12 | <i>HMGCR</i>   | 5q13.3   | HMG-CoA reductase is the rate-limiting enzyme for cholesterol synthesis and is regulated via a negative feedback mechanism mediated by sterols and non-sterol metabolites derived from mevalonate, the product of the reaction catalyzed by reductase | LDL                      | 3.0E-95 | 28334899 |
| 13 | <i>MAPT</i>    | 17q21.31 | Promotes microtubule assembly and stability, and might be involved in the establishment and maintenance of neuronal polarity                                                                                                                          | QRS complex (12-leadsum) | 2.0E-14 | 27659466 |
| 14 | <i>SFXN2</i>   | 10q24.32 | Potential iron transporter                                                                                                                                                                                                                            | Carotid plaque burden    | 2.0E-08 | 28282560 |
| 15 | <i>STARD13</i> | 13q13.1  | It may be involved in regulation of cytoskeletal reorganization, cell proliferation, and cell motility, and acts as a tumor suppressor in hepatoma cells                                                                                              | Intracranial aneurysm    | 3.0E-09 | 20364137 |
| 16 | <i>SUGCT</i>   | 7p14.1   | Catalyzes the succinyl-CoA-dependent conversion of glutarate to glutaryl-CoA                                                                                                                                                                          | Pulse pressure           | 7.0E-12 | 28135244 |
| 17 | <i>TOMM40</i>  | 19q13.32 | It is the channel-forming subunit of the translocase of the mitochondrial outer membrane                                                                                                                                                              | LDL                      | 2.0E-19 | 19060911 |
| 18 | <i>TOP1</i>    | 20q12    | Topoisomerases are ubiquitously expressed enzymes that overcome topological problems in genomic DNA, which can result from DNA replication, transcription and repair                                                                                  | LDL                      | 2.0E-34 | 28334899 |

**Table S8.** Several Variants of MT-nDNA Candidates Are eSNV, Affecting Expression of Some of Their Corresponding Genes or Other cis-Located Genes.

| No  | eSNV       | mainGene        | TargetGene           | AssociatedGWAS trait | eSNV Tissue          | eSNVType |
|-----|------------|-----------------|----------------------|----------------------|----------------------|----------|
| 1   | rs622798   | <b>AKR1A1</b>   | <b>TESK2</b>         | BMI                  | Blood                | 1        |
| 19  | rs10494221 | <b>WARS2</b>    | <b>RP11-418J17.1</b> | WHR                  | Esophagus muscularis | 2        |
| 41  | rs17369123 | <b>DNM3</b>     | <b>SUCO</b>          | WHR                  | Pancreas             | 2        |
| 45  | rs6657476  | <b>CD46</b>     | <b>CD46</b>          | HbA1c                | Esophagus muscularis | 1        |
| 60  | rs933994   | <b>CYP27A1</b>  | <b>RP11-459I19.1</b> | BMI                  | Blood                | 1        |
| 78  | rs11715915 | <b>AMT</b>      | <b>RBM6</b>          | GLUC                 | Skin                 | 2        |
| 78  | rs11715915 | <b>AMT</b>      | <b>MST1</b>          | GLUC                 | Thyroid              | 1        |
| 84  | rs10012946 | <b>WFS1</b>     | <b>WFS1</b>          | GLUC                 | Skin                 | 1        |
| 110 | rs9469886  | <b>UHRF1BP1</b> | <b>SNRPC</b>         | BMI                  | Esophagus muscularis | 1        |
| 140 | rs3734264  | <b>UHRF1BP1</b> | <b>UHRF1BP1</b>      | BMI                  | Artery tibial        | 1        |
| 149 | rs1799884  | <b>GCK</b>      | <b>GCK</b>           | GLUC,HOMA-B,HbA1c    | Thyroid              | 2        |
| 151 | rs3829109  | <b>DNLZ</b>     | <b>CARD9</b>         | GLUC                 | Blood                | 2        |
| 157 | rs1475644  | <b>SFXN2</b>    | <b>C10orf32</b>      | WHR                  | Artery tibial        | 2        |
| 159 | rs1004467  | <b>CYP17A1</b>  | <b>NT5C2</b>         | BMI                  | Testis               | 2        |
| 164 | rs7098825  | <b>AS3MT</b>    | <b>CYP17A1-AS1</b>   | BMI                  | Testis               | 1        |
| 164 | rs7098825  | <b>AS3MT</b>    | <b>MARCKSL1P1</b>    | BMI                  | Adipose subcutaneous | 1        |
| 165 | rs7085104  | <b>AS3MT</b>    | <b>RP11-724N1.1</b>  | BMI                  | Brain Cerebellum     | 1        |
| 166 | rs3740390  | <b>AS3MT</b>    | <b>NT5C2</b>         | BMI                  | Testis               | 2        |
| 173 | rs11030108 | <b>BDNF</b>     | <b>LIN7C</b>         | BMI                  | Artery tibial        | 2        |
| 177 | rs12573978 | <b>AMBRA1</b>   | <b>ATG13</b>         | INS                  | Thyroid              | 1        |
| 180 | rs10838681 | <b>NR1H3</b>    | <b>ATG13</b>         | GLUC                 | Thyroid              | 1        |
| 180 | rs10838681 | <b>NR1H3</b>    | <b>MADD</b>          | INS                  | Brain Cerebellum     | 2        |
| 184 | rs7120118  | <b>NR1H3</b>    | <b>ACP2</b>          | GLUC                 | Skin                 | 1        |
| 184 | rs7120118  | <b>NR1H3</b>    | <b>NR1H3</b>         | GLUC                 | Testis               | 1        |
| 184 | rs7120118  | <b>NR1H3</b>    | <b>MADD</b>          | GLUC                 | Brain Cerebellum     | 2        |
| 186 | rs3817335  | <b>MTCH2</b>    | <b>C1QTNF4</b>       | BMI,INS              | Adipose subcutaneous | 1        |
| 186 | rs3817335  | <b>MTCH2</b>    | <b>SLC39A13</b>      | BMI,INS              | Artery tibial        | 1        |
| 187 | rs4752856  | <b>MTCH2</b>    | <b>PSMC3</b>         | BMI,INS              | Adipose subcutaneous | 1        |
| 190 | rs7118178  | <b>MTCH2</b>    | <b>CELF1</b>         | BMI,GLUC,INS         | Nerve tibial         | 1        |
| 193 | rs174538   | <b>FEN1</b>     | <b>TMEM258</b>       | GLUC                 | Fibroblast           | 1        |
| 199 | rs174549   | <b>FADS1</b>    | <b>TMEM258</b>       | GLUC,HbA1c           | Fibroblast           | 1        |
| 201 | rs174555   | <b>FADS1</b>    | <b>FADS1</b>         | GLUC,HbA1c           | Blood                | 1        |
| 202 | rs174556   | <b>FADS1</b>    | <b>FADS3</b>         | GLUC                 | Brain Cerebellum     | 1        |
| 205 | rs7124057  | <b>EEF1G</b>    | <b>EML3</b>          | WHR                  | Esophagus muscularis | 1        |
| 206 | rs11231150 | <b>TUT1</b>     | <b>MTA2</b>          | WHR                  | Skin                 | 1        |
| 206 | rs11231150 | <b>TUT1</b>     | <b>EEF1G</b>         | WHR                  | Artery tibial        | 1        |
| 226 | rs740862   | <b>DNASE1</b>   | <b>TRAP1</b>         | BMI                  | Muscle skeletal      | 2        |
| 227 | rs1053874  | <b>DNASE1</b>   | <b>CLUAP1</b>        | BMI                  | Skin                 | 2        |
| 227 | rs1053874  | <b>DNASE1</b>   | <b>NLRC3</b>         | BMI                  | Artery tibial        | 2        |

**Table S8** (Cont.). Several Variants of MT-nDNA Candidates Are eSNV, Affect Expression of Some of Their Corresponding Genes or Other cis-Located Genes.

| No  | eSNV       | mainGene       | TargetGene            | AssociatedGWAS Trait | eSNV Tissue          | eSNVType |
|-----|------------|----------------|-----------------------|----------------------|----------------------|----------|
| 236 | rs10499    | <b>ATP2A1</b>  | <b>RP11-1348G14.4</b> | BMI                  | Artery tibial        | 1        |
| 237 | rs14235    | <b>BCKDK</b>   | <b>KAT8</b>           | BMI                  | Skin                 | 1        |
| 237 | rs14235    | <b>BCKDK</b>   | <b>VKORC1</b>         | BMI                  | Liver                | 1        |
| 237 | rs14235    | <b>BCKDK</b>   | <b>ZNF668</b>         | BMI                  | Blood                | 1        |
| 237 | rs14235    | <b>BCKDK</b>   | <b>PRSS53</b>         | BMI                  | Liver                | 1        |
| 247 | rs242559   | <b>MAPT</b>    | <b>PROCA1</b>         | HbA1c                | Thyroid              | 2        |
| 247 | rs2242345  | <b>ERAL1</b>   | <b>TRAF4</b>          | HbA1c                | Fibroblast           | 1        |
| 248 | rs6803     | <b>ERAL1</b>   | <b>TLCD1</b>          | HbA1c                | Thyroid              | 2        |
| 261 | rs3603     | <b>B3GNTL1</b> | <b>RAB40B</b>         | HbA1c                | Muscle skeletal      | 2        |
| 271 | rs7222773  | <b>B3GNTL1</b> | <b>TBCD</b>           | HbA1c                | Pancreas             | 2        |
| 273 | rs9906163  | <b>B3GNTL1</b> | <b>FN3KRP</b>         | HbA1c                | Skin                 | 2        |
| 289 | rs2510344  | <b>NPC1</b>    | <b>C1orf8</b>         | BMI                  | Skin                 | 1        |
| 304 | rs11663558 | <b>NPC1</b>    | <b>NPC1</b>           | BMI                  | Adipose subcutaneous | 1        |
| 326 | rs2425056  | <b>UQCC1</b>   | <b>UQCC1</b>          | WHR                  | Fibroblast           | 1        |
| 366 | rs989711   | <b>TMLHE</b>   | <b>TMLHE</b>          | HbA1c                | Muscle skeletal      | 1        |

Notes: No – order number in Supplementary Table 8 matches with order number of eSNVs in Table S10; eSNV – expression variant that affect expression of Target Gene; mainGene is the gene we anchor the eSNV; eSNVs selected are also associated with any of the 7 studied traits (BMI/WHR/GLUC/INS/HOMA-B/HOMA-IR/HbA1c/; the eSNV affect target gene is specific tissue (eSNV Tissue), but there are more tissues where the same eSNV affects the target gene expression; eSNVType is annotated as 1, when the finding is as ‘lead’ or in high LD with ‘lead’ regulator (LD  $r^2 \geq 0.80$ ), when annotated as 2 then the finding may represent a ‘secondary’ regulator independent from the primary regulator (LD  $r^2 < 0.20$ ). We observed that ‘secondary’ eSNVs were with larger *P*-values than the ‘lead’ SNVs, thus will relatively lower contributions to transcription regulation compared to ‘lead’ eSNVs.

**Table S9.** Transcription Regulation Evidence on 588 SNVs of 109 MT-nDNA Genes Using RegulomeDB and HaploReg  
(**Separate Excel Worksheet**)

**Table S10.** Transcription Regulation of MT-nDNA candidate Variants Using GTEx Software  
(**Separate Excel worksheet**)

---

**Table S11.** Fifteen Genes out of 109 MT-nDNA Candidates Ranked with Highest PageRank Score for PPI

| No | Gene          | # Interacting Proteins | Mapping       | Function                                                                                                                                                                                                                                                                                                                                                                                                                  | Trait               | P-value*              |
|----|---------------|------------------------|---------------|---------------------------------------------------------------------------------------------------------------------------------------------------------------------------------------------------------------------------------------------------------------------------------------------------------------------------------------------------------------------------------------------------------------------------|---------------------|-----------------------|
| 1  | <i>WWOX</i>   | 259                    | 16q23.1-q23.2 | Short-chain dehydrogenases/reductase                                                                                                                                                                                                                                                                                                                                                                                      | WHR                 | 9.99E-07              |
| 2  | <i>YWHAE</i>  | 432                    | 17p13.3       | Tyrosine 3-monooxygenase/tryptophan 5-monooxygenase activation protein epsilon. It interacts with CDC25 phosphatases, RAF1 and IRS1 proteins, with role in diverse biochemical activities related to signal transduction, such as cell division and regulation of insulin sensitivity                                                                                                                                     | BMI                 | 6.27E-07              |
| 3  | <i>RPTOR</i>  | 120                    | 17q25.3       | A component of a signaling pathway that regulates cell growth in response to nutrient and insulin levels                                                                                                                                                                                                                                                                                                                  | BMI                 | 2.49E-09              |
| 4  | <i>TRIM54</i> | 129                    | 2p23.3        | Regulates titin kinase and microtubule-dependent signal pathways in striated muscles                                                                                                                                                                                                                                                                                                                                      | Glucose             | 3.09E-09              |
| 5  | <i>PHB2</i>   | 151                    | 12p13.31      | Prohibitin-2 plays a central role in p21 upregulation following GGCT knockdown and as such may promote deregulated proliferation of cancer cells by suppressing p21 ( <i>CDKN1A</i> ) <sup>54</sup>                                                                                                                                                                                                                       | HbA1c               | 4.44E-08              |
| 6  | <i>AMBRA1</i> | 95                     | 11p11.2       | Functional deficiency of <i>Ambra1</i> in mouse embryos leads to uncontrolled cell proliferation, in addition to severe autophagy impairment <sup>55,56</sup> , glucose and insulin                                                                                                                                                                                                                                       | glucose and insulin | 4.29E-08,<br>4.91E-18 |
| 7  | <i>RAF1</i>   | 194                    | 3p25.2        | The RAF1 protein can phosphorylate to activate the dual specificity protein kinases MEK1 and MEK2, which in turn phosphorylate to activate the serine/threonine specific protein kinases, ERK1 and ERK2. Activated ERKs are pleiotropic effectors of cell physiology and play an important role in the control of gene expression involved in the cell division cycle, apoptosis, cell differentiation and cell migration | WHR                 | 3.60E-10              |
| 8  | <i>TOP1</i>   | 173                    | 20q12         | Controls and alters the topologic states of DNA during transcription                                                                                                                                                                                                                                                                                                                                                      | WHR                 | 4.11E-07              |
| 9  | <i>TOMM40</i> | 126                    | 19q13.32      | Is essential for import of protein precursors into mitochondria                                                                                                                                                                                                                                                                                                                                                           | BMI                 | 1.25E-08              |

| No                                                                    | Gene           | # Interacting Proteins | Mapping       | Function                                                                                                                                                                                        | Trait                    | P-value*                         |
|-----------------------------------------------------------------------|----------------|------------------------|---------------|-------------------------------------------------------------------------------------------------------------------------------------------------------------------------------------------------|--------------------------|----------------------------------|
| 10                                                                    | <i>STARD13</i> | 43                     | 13q13.1-q13.2 | It may be involved in regulation of cytoskeletal reorganization, cell proliferation, and cell motility                                                                                          | BMI                      | 7.25E-08                         |
| 11                                                                    | <i>ESR1</i>    | 771                    | 6q25.1-q25.2  | It is an estrogen receptor, a ligand-activated transcription factor                                                                                                                             | BMI                      | 4.41E-09                         |
| 12                                                                    | <i>ATXN1</i>   | 262                    | 6p22.3        | It is associated with spinocerebellar ataxia type 1                                                                                                                                             | HbA1c                    | 5.52E-07                         |
| 13                                                                    | <i>LRPPRC</i>  | 113                    | 2p21          | it may play a role in cytoskeletal organization, vesicular transport, or in transcriptional regulation of both nuclear and mitochondrial genes. The protein localizes primarily to mitochondria | WHR                      | 8.52E-08                         |
| 14                                                                    | <i>MTCH2</i>   | 87                     | 11p11.2       | It has a regulatory role in adipocyte differentiation                                                                                                                                           | BMI, glucose and insulin | 5.12E-08, 3.84E-14, and 2.16E-29 |
| 15                                                                    | <i>TRAF3</i>   | 121                    | 14q32.32      | It is important for the activation of the immune response                                                                                                                                       | BMI                      | 2.82E-07                         |
| *P-values are sourced from Table 4 in the main text of the manuscript |                |                        |               |                                                                                                                                                                                                 |                          |                                  |

**Table S12.** A Comparison of 109 MT-nDNA Candidate Genes Detected with  $P < 1E-06$ , and Additional SNVs for the Same Genes from GWAS-Catalog Conditional They Pass  $P \leq 5E-08$  (Separate Excel Worksheet)

**Table S13.** A Comparison of mtDNA Association Results of Three Papers with Our Overlapping Results for Different Traits (Separate Excel Worksheet)



**Table S14.** Summary of Chips Used for Studying mtDNA Variants per Cohort and Summary Statistics for Imputation.

| No | Study/Cohort            | Ancestry  | mtDNA Genotyping Array                        | Number of mtDNA SNPs genotyped | SNPs used for imputation | SNPs imputed | Imputation Accuracy (%) | SNPs after fcGENE |
|----|-------------------------|-----------|-----------------------------------------------|--------------------------------|--------------------------|--------------|-------------------------|-------------------|
| 1  | AIRWAVE                 | EA        | Illumina HumanCoreExome                       | 401                            | 258                      | 3399         | 98.9                    | 3653              |
| 2  | ALSPAC                  | EA        | Illumina HumanHap550                          | 33                             | 33                       | 3643         | 70.2                    | 3641              |
| 3  | ARIC                    | AA        | Affy 6.0                                      | 111                            | 60                       | 3622         | 99.3                    | 450               |
| 4  | ARIC                    | EA        | Affy 6.0                                      | 109                            | 60                       | 3622         | 99.4                    | 205               |
| 5  | DANISH-60 YEARS         | EA        | Illumina CoreExome chip                       | 393                            | 285                      | 3655         | 98.6                    | 549               |
| 6  | DANISH-ADDITION PRO     | EA        | Illumina CoreExome chip                       | 392                            | 284                      | 3655         | 98.7                    | 595               |
| 7  | DANISH-COGEN            | EA        | Illumina CoreExome chip                       | 371                            | 284                      | 3656         | 98.9                    | 672               |
| 8  | DANISH-GOYA_CASES       | EA        | Illumina Human660W-quad                       | 58                             | 58                       | 3658         | 68.3                    | 3041              |
| 9  | DANISH-GOYA_CONTROLS    | EA        | Illumina Human660W-quad                       | 58                             | 58                       | 3658         | 68.3                    | 3041              |
| 10 | DANISH-HEALTH06         | EA        | Illumina Human Exome chip                     | 226                            | 194                      | 3633         | 98.4                    | 522               |
| 11 | DANISH-INTER99          | EA        | Illumina Human Exome chip                     | 226                            | 200                      | 3633         | 98.2                    | 552               |
| 12 | DANISH-VEJLE            | EA        | Illumina Human Exome chip                     | 226                            | 199                      | 3633         | 98.4                    | 548               |
| 13 | EPIC-INTERACT-COREEXOME | EA        | Illumina Human CoreExome-12v1-0_B             | 398                            | 182                      | 3655         | 99.8                    | 780               |
| 14 | EPIC-INTERACT-III660W   | EA        | Illumina 660w quad chip                       | 136                            | 135                      | 3637         | 99.8                    | 712               |
| 15 | EPIC-NORFOLK            | EA        | Affymetrix Axiom UKBiobank                    | 264                            | 257                      | 3674         | 99.0                    | 928               |
| 16 | FAMHS                   | EA        | Illumina Human Exome 12v1.0 BeadChip          | 172                            | 168                      | 3631         | 99.9                    | 390               |
| 17 | FENLAND                 | EA        | Affymetrix Axiom UKBiobank                    | 268                            | 261                      | 3674         | 99.1                    | 932               |
| 18 | FHS                     | EA        | Exome Chip, Customized Chip                   | 199                            | 199                      | 3636         | 99.9                    | 639               |
| 19 | GENESTAR                | AA        | Illumina Human1M_v1C BeadChip                 | 162                            | 162                      | 3642         | 99.8                    | 714               |
| 20 | GENESTAR                | EA        | Illumina Human1M_v1C BeadChip                 | 162                            | 162                      | 3642         | 99.8                    | 492               |
| 21 | GENOA                   | AA        | Affy 6.0, Illumina 1M-Duo                     | 90                             | 63                       | 3621         | 99.5                    | 3617              |
| 22 | GENOA                   | EA        | Affy 6.0, Illumina 660W, Illumina 1M-Duo      | 56                             | 45                       | 3620         | 99.3                    | 3615              |
| 23 | GOLDN                   | EA        | Affy 6.0                                      | 110                            | 110                      | 3710         | 77.8                    | 55                |
| 24 | HCHS-SOL                | HA        | Illumina Omni 2.5M chip + 109,571 custom SNPs | 392                            | 314                      | 3667         | 99.3                    | 757               |
| 25 | HYPERGEN                | AA        | Affy 6.0                                      | 110                            | 44                       | 3619         | 86.2                    | 3616              |
| 26 | HYPERGEN                | EA        | Illumina Cardio-MetaboChip                    | 135                            | 52                       | 3622         | 98.4                    | 3618              |
| 27 | LBC-1921                | EA        | Exome chip                                    | 20                             | 20                       | 3621         | 61.2                    | 2102              |
| 28 | LBC-1936                | EA        | Exome chip                                    | 20                             | 20                       | 3621         | 60.6                    | 2194              |
| 29 | LLFS                    | EA        | Illumina Omni chip                            | 253                            | 143                      | 3653         | 99.7                    | 453               |
| 30 | MESA                    | AA        | Affy 6.0                                      | 226                            | 172                      | 3630         | 98.5                    | 505               |
| 31 | MESA                    | EA        | Affy 6.0                                      | 226                            | 172                      | 3630         | 99.6                    | 512               |
| 32 | MESA                    | ASA       | Affy 6.0                                      | 226                            | 172                      | 3630         | 99.3                    | 535               |
| 33 | MESA                    | HA        | Affy 6.0                                      | 226                            | 172                      | 3630         | 99.0                    | 534               |
| 34 | NEO                     | EA        | Illumina HumanCoreExome chip v1               | 306                            | 262                      | 3660         | 97.7                    | 637               |
| 35 | OOA                     | EA        | Illumina CoreExome chip                       | 364                            | 350                      | 3623         | 98.9                    | 3623              |
| 36 | PELOTAS                 | EA        | Illumina HumanOmni2.5-8v1                     | 220                            | 125                      | 3678         | 99.7                    | 356               |
| 37 | PELOTAS                 | Brazilian | Illumina HumanOmni2.5-8v1                     | 220                            | 125                      | 3678         | 99.7                    | 356               |
| 38 | ROTTERDAM STUDY II      | EA        | Illumina 550K (duo)                           | 73                             | 73                       | 3638         | 97.0                    | 3630              |
| 39 | ROTTERDAM STUDY III     | EA        | Illumina 610k (quad)                          | 110                            | 110                      | 3636         | 97.0                    | 3630              |
| 40 | SHIP                    | EA        | Illumina Infinium Human Exome BeadChip v1.0   | 163                            | 163                      | 3630         | 99.8                    | 3625              |
| 41 | TUDR                    | ASA       | Illumina Exome Chip                           | 198                            | 198                      | 3632         | 99.1                    | 547               |
| 42 | WGHS                    | EA        | Illumina HumanExome Beadchip v.1.1            | 204                            | 203                      | 3643         | 99.2                    | 836               |
| 43 | WHI                     | AA        | Affy 6.0                                      | 119                            | 119                      | 3678         | 91.7                    | 525               |
| 44 | WHI                     | HA        | Affy 6.0                                      | 119                            | 119                      | 3678         | 91.0                    | 426               |
| 45 | WUHHHD                  | EA        | Affy 6.0                                      | 167                            | 95                       | 3642         | 95.5                    | 3640              |

**Table S15.** Illumina Infinium Omni Express Exome v1.1

| ID         | Gene            | Variant | Type of Variant | Amino Acid | Base Substitution Associated Phenotypes* | Somatic Variant Associated Phenotypes* | PolyPhen-2 Prediction |
|------------|-----------------|---------|-----------------|------------|------------------------------------------|----------------------------------------|-----------------------|
| rs41531144 | Non-coding      | T217C   |                 |            |                                          |                                        |                       |
| rs41323649 | Non-coding      | G228A   |                 |            |                                          |                                        |                       |
| 2263307    | Non-coding      | C285T   |                 |            |                                          | Elderly fibroblasts                    |                       |
| rs41528348 | Non-coding      | C295T   |                 |            |                                          | POLG/MNGIE muscle;<br>Glioblastoma     |                       |
| 2216184    | Non-coding      | C418T   |                 |            |                                          |                                        |                       |
| rs28625645 | Non-coding      | T489C   |                 |            |                                          | Ovarian carcinoma;                     |                       |
| rs3901846  | Non-coding      | G499A   |                 |            |                                          | Thyroid & prostate tumors              |                       |
| 2216185    | <i>tRNA-Phe</i> | A606G   |                 |            | Myoglobinuria                            |                                        |                       |
| 2216186    | <i>tRNA-Phe</i> | T629C   |                 |            |                                          |                                        |                       |
| 2216191    | <i>12S rRNA</i> | T710C   |                 |            |                                          | Colorectal tumor                       |                       |
| 2216198    | <i>12S rRNA</i> | T921C   |                 |            | Possibly LVNC-associated                 |                                        |                       |
| 2216200    | <i>12S rRNA</i> | G951A   |                 |            |                                          |                                        |                       |
| 2216201    | <i>12S rRNA</i> | T961C   |                 |            | DEAF; Possibly LVNC-associated           |                                        |                       |
| 2216202    | <i>12S rRNA</i> | T1005C  |                 |            | DEAF                                     |                                        |                       |
| 2216203    | <i>12S rRNA</i> | G1018A  |                 |            |                                          |                                        |                       |
| 2216204    | <i>12S rRNA</i> | C1048T  |                 |            |                                          |                                        |                       |
| 2216208    | <i>12S rRNA</i> | T1243C  |                 |            |                                          | Pancreatic cancer cell line            |                       |
| 2216209    | <i>12S rRNA</i> | A1382C  |                 |            |                                          |                                        |                       |
| 2216210    | <i>12S rRNA</i> | G1393A  |                 |            |                                          |                                        |                       |
| 2216211    | <i>12S rRNA</i> | T1406C  |                 |            |                                          | Pancreatic cancer cell line            |                       |
| 2216212    | <i>12S rRNA</i> | T1413C  |                 |            |                                          |                                        |                       |
| 2216213    | <i>12S rRNA</i> | A1438G  |                 |            |                                          |                                        |                       |
| 2216214    | <i>12S rRNA</i> | G1442A  |                 |            |                                          |                                        |                       |
| 2216216    | <i>16S rRNA</i> | G1664A  |                 |            |                                          |                                        |                       |
| 2216217    | <i>16S rRNA</i> | T1694C  |                 |            |                                          |                                        |                       |
| 2216218    | <i>16S rRNA</i> | T1700C  |                 |            |                                          |                                        |                       |
| 2216219    | <i>16S rRNA</i> | C1703T  |                 |            |                                          |                                        |                       |
| 2216220    | <i>16S rRNA</i> | C1706T  |                 |            |                                          |                                        |                       |
| 2216221    | <i>16S rRNA</i> | G1709A  |                 |            |                                          |                                        |                       |

| ID        | Gene            | Variant | Type of Variant | Amino Acid | Base Substitution Associated Phenotypes* | Somatic Variant Associated Phenotypes*                           | PolyPhen-2 Prediction |
|-----------|-----------------|---------|-----------------|------------|------------------------------------------|------------------------------------------------------------------|-----------------------|
| 2216222   | <i>16S rRNA</i> | T1717C  |                 |            |                                          |                                                                  |                       |
| rs3928305 | <i>16S rRNA</i> | G1719A  |                 |            |                                          |                                                                  |                       |
| 2216228   | <i>16S rRNA</i> | A1811G  |                 |            |                                          | Head/neck tumor                                                  |                       |
| 2216231   | <i>16S rRNA</i> | A1842G  |                 |            |                                          |                                                                  |                       |
| 2216232   | <i>16S rRNA</i> | G1888A  |                 |            |                                          |                                                                  |                       |
| 2216234   | <i>16S rRNA</i> | G2056A  |                 |            |                                          | Bladder tumor; Acute leukemia platelets, leukocytes, bone marrow |                       |
| 2216238   | <i>16S rRNA</i> | C2218T  |                 |            |                                          |                                                                  |                       |
| 2216239   | <i>16S rRNA</i> | C2259T  |                 |            |                                          |                                                                  |                       |
| 2216240   | <i>16S rRNA</i> | C2283T  |                 |            |                                          |                                                                  |                       |
| 2216241   | <i>16S rRNA</i> | C2332T  |                 |            |                                          |                                                                  |                       |
| 2216242   | <i>16S rRNA</i> | T2352C  |                 |            | Possibly LVNC-associated                 |                                                                  |                       |
| 2216243   | <i>16S rRNA</i> | A2358G  |                 |            |                                          |                                                                  |                       |
| 2216244   | <i>16S rRNA</i> | T2416C  |                 |            |                                          |                                                                  |                       |
| 2216245   | <i>16S rRNA</i> | C2417G  |                 |            |                                          |                                                                  |                       |
| 2216249   | <i>16S rRNA</i> | A2706G  |                 |            |                                          |                                                                  |                       |
| 2216250   | <i>16S rRNA</i> | G2758A  |                 |            |                                          |                                                                  |                       |
| 2216251   | <i>16S rRNA</i> | A2768G  |                 |            |                                          |                                                                  |                       |
| 2216252   | <i>16S rRNA</i> | C2772T  |                 |            |                                          |                                                                  |                       |
| 2216254   | <i>16S rRNA</i> | G2831A  |                 |            |                                          |                                                                  |                       |
| 2216255   | <i>16S rRNA</i> | T2885C  |                 |            |                                          |                                                                  |                       |
| 2216256   | <i>16S rRNA</i> | G3010A  |                 |            | Cyclic vomiting syndrome with migraine   |                                                                  |                       |
| 2216257   | <i>16S rRNA</i> | T3027C  |                 |            |                                          |                                                                  |                       |
| 2216258   | <i>16S rRNA</i> | C3116T  |                 |            |                                          |                                                                  |                       |
| 2216259   | <i>16S rRNA</i> | T3197C  |                 |            |                                          |                                                                  |                       |
| 2216260   | <i>16S rRNA</i> | T3200A  |                 |            |                                          |                                                                  |                       |
| 2216261   | <i>16S rRNA</i> | C3206T  |                 |            |                                          |                                                                  |                       |
| 2216262   | <i>16S rRNA</i> | C3210T  |                 |            |                                          |                                                                  |                       |
| rs2853516 | <i>ND1</i>      | G3316A  | Nonsynonymous   | A4T        | Diabetes; LHON; PEO                      |                                                                  | Benign                |

| ID         | Gene            | Variant | Type of Variant | Amino Acid | Base Substitution Associated Phenotypes*                    | Somatic Variant Associated Phenotypes*              | PolyPhen-2 Prediction |
|------------|-----------------|---------|-----------------|------------|-------------------------------------------------------------|-----------------------------------------------------|-----------------------|
| 2216265    | <i>ND1</i>      | T3338C  | Nonsynonymous   | V11A       |                                                             |                                                     | Benign                |
| 2216266    | <i>ND1</i>      | T3394C  | Nonsynonymous   | Y30H       | LHON; Diabetes; CPT deficiency; High altitude adaptation    | Acute leukemia platelets, leukocytes, & bone marrow | Benign                |
| 2216267    | <i>ND1</i>      | T3398C  | Nonsynonymous   | M31T       | DMDf+HCM; GDM; Possibly LVNC cardiomyopathy-associated      |                                                     | Benign                |
| 2216268    | <i>ND1</i>      | A3434G  | Nonsynonymous   | Y43C       |                                                             | Prostate tumor                                      | Benign                |
| 2216269    | <i>ND1</i>      | C3497T  | Nonsynonymous   | A64V       | LHON                                                        |                                                     | Benign                |
| 2216271    | <i>ND1</i>      | A3547G  | Nonsynonymous   | I81V       |                                                             |                                                     | Benign                |
| 2216272    | <i>ND1</i>      | C3571T  | Nonsynonymous   | L89F       |                                                             |                                                     | Probably damaging     |
| 2263308    | <i>ND1</i>      | G3736A  | Nonsynonymous   | V144I      | LHON                                                        |                                                     | Benign                |
| 2216273    | <i>ND1</i>      | C3746T  | Nonsynonymous   | A147V      |                                                             |                                                     | Benign                |
| 2216274    | <i>ND1</i>      | T3866C  | Nonsynonymous   | I187T      | LHON + limb claudication                                    |                                                     | Benign                |
| 2216277    | <i>ND1</i>      | A4021G  | Nonsynonymous   | T239A      |                                                             |                                                     | Benign                |
| 2216280    | <i>ND1</i>      | A4093G  | Nonsynonymous   | T263A      |                                                             |                                                     | Benign                |
| 2216281    | <i>ND1</i>      | A4123G  | Nonsynonymous   | I273V      |                                                             |                                                     | Benign                |
| 2216282    | <i>ND1</i>      | A4129G  | Nonsynonymous   | T275A      |                                                             |                                                     | Benign                |
| 2216284    | <i>tRNA-Ile</i> | C4312T  |                 |            |                                                             | Thyroid tumor                                       |                       |
| rs41456348 | <i>tRNA-Gly</i> | T4336C  |                 |            | AD; PD; Hearing loss & migraine<br>Possibly associated with |                                                     |                       |
| 2216286    | <i>tRNA-Gln</i> | T4363C  |                 |            | DEAF + RP + developmental delay; Hypertension               |                                                     |                       |
| 2216294    | <i>ND2</i>      | A4732G  | Nonsynonymous   | N88S       |                                                             |                                                     | Benign                |
| 2263338    | <i>ND2</i>      | A4917G  | Nonsynonymous   | N150D      | LHON; Insulin resistance; AMD; NRTI-PN; Haplogroup T marker |                                                     | Benign                |

| ID        | Gene            | Variant | Type of Variant | Amino Acid | Base Substitution Associated Phenotypes*                | Somatic Variant Associated Phenotypes* | PolyPhen-2 Prediction |
|-----------|-----------------|---------|-----------------|------------|---------------------------------------------------------|----------------------------------------|-----------------------|
| 2216303   | <i>ND2</i>      | C5331A  | Nonsynonymous   | L288I      |                                                         |                                        | Benign                |
| rs3021088 | <i>ND2</i>      | G5460A  | Nonsynonymous   | A331T      | AD; PD                                                  |                                        | Benign                |
| 2216317   | <i>tRNA-Cys</i> | T5814C  |                 |            | Mitochondrial encephalopathy; Haplogroup H2b marker     | MNGIE tissues                          |                       |
| 2216322   | <i>CO1</i>      | T6253C  | Nonsynonymous   | M117T      | Prostate cancer; Enriched in POAG cohort                |                                        | Benign                |
| 2216323   | <i>CO1</i>      | G6261A  | Nonsynonymous   | A120T      | Prostate cancer; LHON                                   |                                        | Probably damaging     |
| 2216324   | <i>CO1</i>      | G6267A  | Nonsynonymous   | A122T      | Prostate cancer                                         | Pancreatic cancer cell line            | Benign                |
| 2216325   | <i>CO1</i>      | G6480A  | Nonsynonymous   | V193I      | Prostate cancer; Enriched in POAG cohort                |                                        | Benign                |
| 2263312   | <i>CO1</i>      | A6663G  | Nonsynonymous   | I254V      | Prostate cancer                                         |                                        | Benign                |
| 2263313   | <i>CO1</i>      | A6982G  | Nonsynonymous   | N360S      |                                                         |                                        | Probably damaging     |
| 2216332   | <i>tRNA-Ser</i> | C7476T  |                 |            |                                                         | Thyroid hyperplasia                    |                       |
| 2263318   | <i>ATP8</i>     | A8411C  | Nonsynonymous   | M16L       |                                                         |                                        | Benign                |
| 2216340   | <i>ATP8</i>     | C8414T  | Nonsynonymous   | L17F       | Longevity                                               |                                        | Probably damaging     |
| 2216341   | <i>ATP8</i>     | C8417T  | Nonsynonymous   | L18F       |                                                         |                                        | Probably Damaging     |
| 2216342   | <i>ATP8</i>     | A8460G  | Nonsynonymous   | N32S       |                                                         |                                        | Possibly Damaging     |
| 2216343   | <i>ATP8</i>     | C8478T  | Nonsynonymous   | S38L       |                                                         |                                        | Benign                |
| 2263319   | <i>ATP6</i>     | C8684T  | Nonsynonymous   | T53I       |                                                         |                                        | Benign                |
| 2263340   | <i>ATP6</i>     | A8701G  | Nonsynonymous   | T59A       |                                                         | Thyroid tumors                         | Benign                |
| 2263320   | <i>ATP6</i>     | G8857A  | Nonsynonymous   | G111S      |                                                         |                                        | Benign                |
| 2216361   | <i>ATP6</i>     | G8896A  | Nonsynonymous   | A124T      |                                                         |                                        | Benign                |
| 2216366   | <i>ATP6</i>     | G9053A  | Nonsynonymous   | S176N      |                                                         |                                        | Benign                |
| 2216368   | <i>ATP6</i>     | T9098C  | Nonsynonymous   | I191T      | Predisposition to anti-retroviral mitochondrial disease |                                        | Probably damaging     |
| rs2853825 | <i>CO3</i>      | G9477A  | Nonsynonymous   | V91I       |                                                         | Thyroid tumor                          | Benign                |
| 2263321   | <i>CO3</i>      | G9804A  | Nonsynonymous   | A200T      | LHON                                                    | Pancreatic cancer cell line            | Benign                |
| 2216376   | <i>CO3</i>      | A9855G  | Nonsynonymous   | I217V      |                                                         |                                        | Benign                |

| ID         | Gene            | Variant | Type of Variant | Amino Acid | Base Substitution Associated Phenotypes*                                                                        | Somatic Variant Associated Phenotypes* | PolyPhen-2 Prediction |
|------------|-----------------|---------|-----------------|------------|-----------------------------------------------------------------------------------------------------------------|----------------------------------------|-----------------------|
| 2216377    | <i>CO3</i>      | T9903C  | Nonsynonymous   | F233L      |                                                                                                                 |                                        | Probably damaging     |
| 2216378    | <i>CO3</i>      | G9966A  | Nonsynonymous   | V254I      |                                                                                                                 |                                        | Benign                |
| 2216379    | <i>tRNA-Gly</i> | T10007C |                 |            |                                                                                                                 |                                        |                       |
| 2216380    | <i>tRNA-Gly</i> | T10031C |                 |            |                                                                                                                 |                                        |                       |
| 2263322    | <i>tRNA-Gly</i> | T10034C |                 |            |                                                                                                                 |                                        |                       |
| 2263323    | <i>ND3</i>      | T10084C | Nonsynonymous   | I9T        |                                                                                                                 |                                        | Benign                |
| 2216384    | <i>ND3</i>      | A10086G | Nonsynonymous   | N10D       | Hypertensive end-stage renal disease                                                                            |                                        | Probably damaging     |
| 2216385    | <i>ND3</i>      | G10143A | Nonsynonymous   | G29S       |                                                                                                                 |                                        | Benign                |
| 2216386    | <i>ND3</i>      | T10321C | Nonsynonymous   | V88A       |                                                                                                                 | Bladder tumor                          | Benign                |
| 2216387    | <i>ND3</i>      | T10345C | Nonsynonymous   | I96T       |                                                                                                                 |                                        | Benign                |
| rs2853826  | <i>ND3</i>      | A10398G | Nonsynonymous   | T114A      | PD protective factor; Longevity; Altered cell pH; Metabolic syndrome; Breast cancer risk; Haplogroup IJK marker |                                        | Benign                |
| 2216389    | <i>tRNA-Arg</i> | T10410C |                 |            |                                                                                                                 |                                        |                       |
| rs28358279 | <i>tRNA-Arg</i> | T10463C |                 |            |                                                                                                                 | Endometrium tumor                      |                       |
| 2216391    | <i>ND4L</i>     | T10609C | Nonsynonymous   | M47T       |                                                                                                                 |                                        | Benign                |
| 2216394    | <i>ND4</i>      | T11025C | Nonsynonymous   | L89P       |                                                                                                                 |                                        | Benign                |
| 2216396    | <i>ND4</i>      | A11172G | Nonsynonymous   | N138S      |                                                                                                                 |                                        | Probably damaging     |
| 2216397    | <i>ND4</i>      | C11177T | Nonsynonymous   | P140S      |                                                                                                                 |                                        | Probably damaging     |
| 2216398    | <i>ND4</i>      | T11204C | Nonsynonymous   | F149L      |                                                                                                                 |                                        | Benign                |
| 2216399    | <i>ND4</i>      | T11253C | Nonsynonymous   | I165T      | LHON; PD                                                                                                        |                                        | Benign                |
| 2216400    | <i>ND4</i>      | G11696A | Nonsynonymous   | V313I      | LHON; LDYT; DEAF; Hypertension helper mutation                                                                  |                                        | Benign                |
| 2216401    | <i>ND4</i>      | G11963A | Nonsynonymous   | V402I      |                                                                                                                 |                                        | Benign                |
| 2216402    | <i>ND4</i>      | G11969A | Nonsynonymous   | A404T      |                                                                                                                 |                                        | Benign                |
| 2216403    | <i>ND4</i>      | T11984C | Nonsynonymous   | Y409H      |                                                                                                                 |                                        | Probably damaging     |
| 2216406    | <i>tRNA-Ser</i> | G12236A |                 |            | DEAF                                                                                                            | Thyroid tumor                          |                       |

| ID         | Gene             | Variant | Type of Variant | Amino Acid | Base Substitution Associated Phenotypes*                                                               | Somatic Variant Associated Phenotypes*                            | PolyPhen-2 Prediction |
|------------|------------------|---------|-----------------|------------|--------------------------------------------------------------------------------------------------------|-------------------------------------------------------------------|-----------------------|
| 2216407    | <i>tRNA-Ser</i>  | A12248G |                 |            |                                                                                                        |                                                                   |                       |
| rs2853498  | <i>tRNA-Leu2</i> | A12308G |                 |            | CPEO; Stroke; CM; Breast, renal, and prostate cancer risk; Altered brain pH; sCJD; Haplogroup U marker | Endometrium control tissue; Lung and prostate tumors              |                       |
| 2216414    | <i>ND5</i>       | A12397G | Nonsynonymous   | T21A       |                                                                                                        |                                                                   | Unknown               |
| 2216417    | <i>ND5</i>       | G12454A | Nonsynonymous   | V40I       |                                                                                                        |                                                                   | Benign                |
| 2216418    | <i>ND5</i>       | C12542T | Nonsynonymous   | A69V       |                                                                                                        |                                                                   | Possibly damaging     |
| 2263325    | <i>ND5</i>       | G12820A | Nonsynonymous   | A162T      |                                                                                                        |                                                                   | Benign                |
| 2263326    | <i>ND5</i>       | A12937G | Nonsynonymous   | M201V      |                                                                                                        |                                                                   | Benign                |
| 2216420    | <i>ND5</i>       | G12940A | Nonsynonymous   | A202T      |                                                                                                        |                                                                   | Benign                |
| 2216421    | <i>ND5</i>       | A12950G | Nonsynonymous   | N205S      |                                                                                                        |                                                                   | Benign                |
| 2216422    | <i>ND5</i>       | A13105G | Nonsynonymous   | I257V      |                                                                                                        |                                                                   | Benign                |
| 2216423    | <i>ND5</i>       | G13135A | Nonsynonymous   | A267T      | Possible HCM susceptibility                                                                            |                                                                   | Benign                |
| 2216424    | <i>ND5</i>       | A13276G | Nonsynonymous   | M314V      |                                                                                                        |                                                                   | Benign                |
| 2216425    | <i>ND5</i>       | G13477A | Nonsynonymous   | A381T      |                                                                                                        |                                                                   | Benign                |
| rs28359178 | <i>ND5</i>       | G13708A | Nonsynonymous   | A458T      | LHON; Increased MS risk; Higher frequency in PD-ADS; Haplogroup J marker                               | Acute leukemia platelets, leukocytes, & bone marrow; Breast tumor | Benign                |
| 2263327    | <i>ND5</i>       | A13780G | Nonsynonymous   | I482V      |                                                                                                        |                                                                   | Benign                |
| 2216429    | <i>ND5</i>       | T13789C | Nonsynonymous   | Y485H      |                                                                                                        |                                                                   | Probably damaging     |
| 2216431    | <i>ND5</i>       | C13880A | Nonsynonymous   | S515Y      |                                                                                                        |                                                                   | Possibly damaging     |
| 2216432    | <i>ND5</i>       | T13886C | Nonsynonymous   | L517P      |                                                                                                        |                                                                   | Benign                |
| 2216433    | <i>ND5</i>       | C13924T | Nonsynonymous   | P530S      |                                                                                                        |                                                                   | Probably damaging     |
| 2216434    | <i>ND5</i>       | A13933G | Nonsynonymous   | T533A      |                                                                                                        |                                                                   | Benign                |
| 2263328    | <i>ND5</i>       | C13934T | Nonsynonymous   | T533M      |                                                                                                        |                                                                   | Benign                |
| 2216436    | <i>ND5</i>       | A13942G | Nonsynonymous   | T536A      |                                                                                                        |                                                                   | Benign                |
| 2216437    | Non-Coding       | G13958C | Nonsynonymous   | G541A      |                                                                                                        |                                                                   | Possibly damaging     |

| ID         | Gene     | Variant | Type of Variant | Amino Acid  | Base Substitution Associated Phenotypes*        | Somatic Variant Associated Phenotypes*          | PolyPhen-2 Prediction |
|------------|----------|---------|-----------------|-------------|-------------------------------------------------|-------------------------------------------------|-----------------------|
| 2263329    | ND5      | A13966G | Nonsynonymous   | T544A       |                                                 |                                                 | Benign                |
| 2216439    | ND5      | C13981T | Nonsynonymous   | P549S       |                                                 |                                                 | Benign                |
| 2216440    | ND5      | T14000A | Nonsynonymous   | L555Q       |                                                 | Prostate tumor                                  | Probably damaging     |
| 2216441    | ND5      | A14053G | Nonsynonymous   | T573A       |                                                 |                                                 | Benign                |
| 2216442    | ND5      | A14059G | Nonsynonymous   | I575V       |                                                 |                                                 | Benign                |
| 2216443    | ND5      | A14148G | Synonymous      | Term604Term |                                                 |                                                 |                       |
| 2216444    | ND6      | T14178C | Nonsynonymous   | I166V       |                                                 |                                                 | Benign                |
| 2216445    | ND6      | T14180C | Nonsynonymous   | Y165C       |                                                 |                                                 | Probably damaging     |
| 2216446    | ND6      | G14258A | Nonsynonymous   | P139L       |                                                 |                                                 | Benign                |
| 2216447    | ND6      | T14318C | Nonsynonymous   | N119S       |                                                 |                                                 | Benign                |
| 2216448    | ND6      | T14502C | Nonsynonymous   | I58V        | LHON                                            |                                                 | Benign                |
| 2263330    | tRNA-Glu | A14687G |                 |             | Mitochondrial myopathy with respiratory failure | Mitochondrial myopathy with respiratory failure |                       |
| rs3135031  | CYB      | C14766T | Nonsynonymous   | T7I         |                                                 |                                                 | Benign                |
| rs28357681 | CYB      | T14798C | Nonsynonymous   | F18L        |                                                 | Glioblastoma                                    | Benign                |
| 2216456    | CYB      | G14861A | Nonsynonymous   | A39T        |                                                 |                                                 | Benign                |
| 2216457    | CYB      | A14927G | Nonsynonymous   | T61A        |                                                 |                                                 | Benign                |
| 2216458    | CYB      | A14978G | Nonsynonymous   | I78V        |                                                 |                                                 | Benign                |
| 2216459    | CYB      | T14979C | Nonsynonymous   | I78T        |                                                 |                                                 | Benign                |
| 2216460    | CYB      | A15038G | Nonsynonymous   | I98V        |                                                 |                                                 | Possibly damaging     |
| 2216461    | CYB      | T15071C | Nonsynonymous   | Y109H       |                                                 |                                                 | Benign                |
| 2216462    | CYB      | T15074C | Nonsynonymous   | S110P       |                                                 |                                                 | Benign                |
| 2216463    | CYB      | G15077A | Nonsynonymous   | E111K       | DEAF                                            |                                                 | Probably damaging     |
| 2216464    | CYB      | G15110A | Nonsynonymous   | A122T       |                                                 |                                                 | Benign                |
| 2216465    | CYB      | T15204C | Nonsynonymous   | I153T       |                                                 |                                                 | Benign                |
| 2263332    | CYB      | G15119A | Nonsynonymous   | A125T       |                                                 |                                                 | Benign                |
| rs2853506  | CYB      | A15218G | Nonsynonymous   | T158A       |                                                 |                                                 | Possibly damaging     |
| 2216467    | CYB      | A15236G | Nonsynonymous   | I164V       |                                                 |                                                 | Benign                |
| 2216468    | CYB      | G15257A | Nonsynonymous   | D171N       | LHON; Haplogroup J2 marker                      |                                                 | Benign                |



| ID         | Gene            | Variant | Type of Variant | Amino Acid | Base Substitution Associated Phenotypes*                                          | Somatic Variant Associated Phenotypes* | PolyPhen-2 Prediction |
|------------|-----------------|---------|-----------------|------------|-----------------------------------------------------------------------------------|----------------------------------------|-----------------------|
| 2263333    | <i>CYB</i>      | C15263T | Nonsynonymous   | P173S      |                                                                                   |                                        | Benign                |
| 2216469    | <i>CYB</i>      | A15311G | Nonsynonymous   | I189V      |                                                                                   |                                        | Benign                |
| 2216470    | <i>CYB</i>      | G15314A | Nonsynonymous   | A190T      |                                                                                   |                                        | Benign                |
| 2216471    | <i>CYB</i>      | G15323A | Nonsynonymous   | A193T      |                                                                                   |                                        | Benign                |
| 2216472    | <i>CYB</i>      | A15326G | Nonsynonymous   | T194A      |                                                                                   |                                        | Benign                |
| 2216473    | <i>CYB</i>      | C15381T | Nonsynonymous   | T212I      |                                                                                   |                                        | Benign                |
| 2216474    | <i>CYB</i>      | C15402T | Nonsynonymous   | T219I      |                                                                                   |                                        | Possibly damaging     |
| 2216475    | <i>CYB</i>      | G15431A | Nonsynonymous   | A229T      |                                                                                   |                                        | Benign                |
| rs3088309  | <i>CYB</i>      | C15452A | Nonsynonymous   | L236I      |                                                                                   |                                        | Benign                |
| 2216478    | <i>CYB</i>      | T15479C | Nonsynonymous   | F245L      |                                                                                   |                                        | Benign                |
| 2216479    | <i>CYB</i>      | G15497A | Nonsynonymous   | G251S      | EXIT; Obesity<br>Complex<br>mitochondriopathy-<br>associated                      | Breast tumor                           | Benign                |
| 2216481    | <i>CYB</i>      | A15662G | Nonsynonymous   | I306V      |                                                                                   | Breast tumor                           | Benign                |
| 2216482    | <i>CYB</i>      | T15672C | Nonsynonymous   | M309T      |                                                                                   | Breast tumor                           | Benign                |
| 2263334    | <i>CYB</i>      | T15693C | Nonsynonymous   | M316T      | Possibly LVNC<br>cardiomyopathy-<br>associated                                    | Breast tumor                           | Benign                |
| rs41337244 | <i>CYB</i>      | A15758G | Nonsynonymous   | I338V      |                                                                                   |                                        | Benign                |
| 2216486    | <i>CYB</i>      | A15824G | Nonsynonymous   | T360A      |                                                                                   | Breast tumor                           | Benign                |
| 2216487    | <i>CYB</i>      | C15849T | Nonsynonymous   | T368I      |                                                                                   | Breast tumor                           | Benign                |
| 2216489    | <i>CYB</i>      | A15860G | Nonsynonymous   | I372V      |                                                                                   |                                        | Benign                |
| 2263335    | <i>tRNA-Thr</i> | T15889C |                 |            |                                                                                   |                                        |                       |
| 2263341    | <i>tRNA-Thr</i> | C15904T |                 |            |                                                                                   |                                        |                       |
| 2216491    | <i>tRNA-Thr</i> | T15905C |                 |            |                                                                                   |                                        |                       |
| 2216492    | <i>tRNA-Thr</i> | A15907G |                 |            |                                                                                   |                                        |                       |
| rs2853510  | <i>tRNA-Thr</i> | A15924G |                 |            | LIMM<br>Multiple sclerosis;<br>Idiopathic repeat<br>miscarriage; AD<br>protection |                                        |                       |
| 2263337    | <i>tRNA-Thr</i> | G15928A |                 |            |                                                                                   |                                        |                       |
| 2216495    | <i>tRNA-Thr</i> | C15939T |                 |            |                                                                                   |                                        |                       |

| ID         | Gene            | Variant | Type of Variant | Amino Acid | Base Substitution Associated Phenotypes* | Somatic Variant Associated Phenotypes* | PolyPhen-2 Prediction |
|------------|-----------------|---------|-----------------|------------|------------------------------------------|----------------------------------------|-----------------------|
| 2263336    | <i>tRNA-Thr</i> | T15940C |                 |            |                                          |                                        |                       |
| 2216496    | <i>tRNA-Thr</i> | T15941C |                 |            |                                          |                                        |                       |
| 2216497    | <i>tRNA-Thr</i> | T15942C |                 |            | Possibly LVNC-associated                 |                                        |                       |
| 2216498    | <i>tRNA-Thr</i> | C15946T |                 |            |                                          |                                        |                       |
| 2216499    | <i>tRNA-Thr</i> | A15951G |                 |            | LHON modulator                           |                                        |                       |
| 2216500    | <i>tRNA-Pro</i> | C15978T |                 |            |                                          |                                        |                       |
| 2216501    | <i>tRNA-Pro</i> | T16017C |                 |            |                                          |                                        |                       |
| rs41378955 | Non-coding      | G16390A |                 |            | POAG-potential for association           | Breast and ovarian tumors              |                       |

\*MITOMAP

ND = NADH dehydrogenase; CYB = Cytochrome b; CO = Cytochrome c oxidase; ATP = ATP synthase; POLG = Mitochondrial DNA polymerase  $\gamma$ ; MNGIE = Mitochondrial neurogastrointestinal encephalopathy; LVNC = Left ventricular non-compaction cardiomyopathy; DEAF = Deafness; LHON = Leber Hereditary optic neuropathy; PEO = Progressive external ophthalmoplegia; CPT = Carnitine palmitoyltransferase deficiency; DMDF = Diabetes mellitus and deafness; HCM = Hypertrophic cardiomyopathy; GDM = Gestational diabetes mellitus; AD = Alzheimer's disease; PD = Parkinson's disease; RP = Retinitis pigmentosa; AMD = Age-related macular degeneration; POAG = Primary open angle glaucoma; LDYT = Leber hereditary optic neuropathy and dystonia; CM = Cardiomyopathy; sCJD = Sporadic Creutzfeldt-Jaakob disease; MS = Multiple sclerosis; PD-ADS = Acquired demyelinating syndromes; HCM = Hypertrophic cardiomyopathy; EXIT = Exercise intolerance; L IMM = Lethal infantile mitochondrial myopathy

**Table S16.** Infinium Human Exome v1.0

| ID         | Gene       | Variant | Type of Variant | Amino Acid | Base Substitution Associated Phenotypes*          | Somatic Variant Associated Phenotypes*                          | PolyPhen-2 Prediction |
|------------|------------|---------|-----------------|------------|---------------------------------------------------|-----------------------------------------------------------------|-----------------------|
| rs28625645 | Non-coding | T89C    |                 |            |                                                   |                                                                 |                       |
| rs62581312 | Non-coding | C150T   |                 |            | Longevity; Cervical carcinoma; HPV infection risk | Elderly fibroblasts; Leukocytes, lung, thyroid, prostate tumors |                       |

| ID         | Gene             | Variant | Type of Variant | Amino Acid | Base Substitution Associated Phenotypes*                                                                                    | Somatic Variant Associated Phenotypes*                                  | PolyPhen-2 Prediction |
|------------|------------------|---------|-----------------|------------|-----------------------------------------------------------------------------------------------------------------------------|-------------------------------------------------------------------------|-----------------------|
| rs41531144 | Non-coding       | T217C   |                 |            |                                                                                                                             |                                                                         |                       |
| rs41323649 | Non-coding       | G228A   |                 |            |                                                                                                                             |                                                                         |                       |
| rs41528348 | Non-coding       | C295T   |                 |            |                                                                                                                             | POLG & MNGIE muscle;<br>Glioblastoma                                    |                       |
| rs3901846  | Non-coding       | G499A   |                 |            |                                                                                                                             | Thyroid & prostate tumors                                               |                       |
| rs3928305  | <i>16S rRNA</i>  | G1719A  |                 |            |                                                                                                                             |                                                                         |                       |
| rs2853516  | <i>ND1</i>       | G3316A  | Nonsynonymous   | A4T        | Diabetes; LHON; PEO<br>AD; PD; Hearing loss &<br>migraine                                                                   |                                                                         | Benign                |
| rs41456348 | <i>tRNA-Gln</i>  | T4336C  |                 |            |                                                                                                                             |                                                                         |                       |
| rs3021088  | <i>ND2</i>       | G5460A  | Nonsynonymous   | A331T      | AD; PD                                                                                                                      |                                                                         | Benign                |
| rs2853825  | <i>CO3</i>       | G9477A  | Nonsynonymous   | V91I       |                                                                                                                             | Thyroid tumor                                                           | Benign                |
| rs2853826  | <i>ND3</i>       | A10398G | Nonsynonymous   | T114A      | PD protective factor;<br>Longevity; Altered cell<br>pH; Metabolic syndrome;<br>Breast cancer risk;<br>Haplogroup IJK marker | Thyroid tumor                                                           | Benign                |
| rs28358279 | <i>tRNA-Arg</i>  | T10463C |                 |            |                                                                                                                             | Endometrium tumor                                                       |                       |
| rs2853498  | <i>tRNA-Leu2</i> | A12308G |                 |            |                                                                                                                             |                                                                         |                       |
| rs28359178 | <i>ND5</i>       | G13708A | Nonsynonymous   | A458T      | LHON; Increased MS risk;<br>Higher frequency in<br>PD/ADS; Haplogroup J<br>marker                                           | Acute leukemia platelets,<br>leukocytes, & bone<br>marrow; Breast tumor | Benign                |
| rs3135031  | <i>CYB</i>       | C14766T | Nonsynonymous   | T7I        |                                                                                                                             |                                                                         | Benign                |
| rs28357681 | <i>CYB</i>       | T14798C | Nonsynonymous   | F18L       |                                                                                                                             | Glioblastoma                                                            | Benign                |
| rs2853506  | <i>CYB</i>       | A15218G | Nonsynonymous   | T158A      |                                                                                                                             |                                                                         | Possibly damaging     |
| rs3088309  | <i>CYB</i>       | C15452A | Nonsynonymous   | L236I      |                                                                                                                             |                                                                         | Benign                |
| rs41337244 | <i>CYB</i>       | A15758G | Nonsynonymous   | I338V      |                                                                                                                             |                                                                         | Benign                |
| rs2853510  | <i>tRNA-Thr</i>  | A15924G |                 |            | LIMM                                                                                                                        |                                                                         |                       |
| rs41378955 | Non-coding       | G16390A |                 |            | POAG- potential for<br>association                                                                                          | Breast, ovarian tumor                                                   |                       |

\*MITOMAP

ND = NADH dehydrogenase; CYB = Cytochrome b; CO = Cytochrome c oxidase; ATP = ATP synthase; HPV = Human papillomavirus; POLG = Mitochondrial DNA polymerase  $\gamma$ ; MNGIE = Mitochondrial neurogastrointestinal encephalopathy; LHON = Leber Hereditary optic neuropathy; PEO = Progressive external ophthalmoplegia; AD = Alzheimer's disease; PD = Parkinson's disease; MS = Multiple sclerosis; L IMM = Lethal infantile mitochondrial myopathy; POAG = Primary open angle glaucoma

**Table S17.** Infinium Core Exome v1.1

| ID             | Gene            | Variant | Type of Variant | Amino Acid | Base Substitution Associated Phenotypes* | Somatic Variant Associated Phenotypes*                        | PolyPhen-2 Prediction |
|----------------|-----------------|---------|-----------------|------------|------------------------------------------|---------------------------------------------------------------|-----------------------|
| 2010-08-MT-841 | Non-coding      | T72C    |                 |            |                                          | Aging brains; POLG/PEO & control muscle; Normal tissues       |                       |
| 2010-08-MT-981 | Non-coding      | A93G    |                 |            |                                          |                                                               |                       |
| 200610-102     | Non-coding      | T125C   |                 |            |                                          | POLG/PEO & control muscle                                     |                       |
| 2010-08-MT-550 | Non-coding      | A215G   |                 |            |                                          | Esophageal cancer                                             |                       |
| rs41531144     | Non-coding      | T217C   |                 |            |                                          |                                                               |                       |
| rs41323649     | Non-coding      | G228A   |                 |            |                                          |                                                               |                       |
| 200610-105     | Non-coding      | T236C   |                 |            |                                          |                                                               |                       |
| 2263307        | Non-coding      | C285T   |                 |            |                                          | Elderly fibroblasts                                           |                       |
| rs41528348     | Non-coding      | C295T   |                 |            |                                          | POLG/MNGIE muscle; Glioblastoma                               |                       |
| 2216184        | Non-coding      | C418T   |                 |            |                                          |                                                               |                       |
| rs28625645     | Non-coding      | T489C   |                 |            |                                          | Ovarian carcinoma; Prostate cancer; Thyroid & prostate tumors |                       |
| rs3901846      | Non-coding      | G499A   |                 |            |                                          |                                                               |                       |
| 2216185        | <i>tRNA-Phe</i> | A606G   |                 |            | Myoglobinuria                            |                                                               |                       |
| 2216186        | <i>tRNA-Phe</i> | T629C   |                 |            |                                          |                                                               |                       |

| ID             | Gene            | Variant | Type of Variant | Amino Acid | Base Substitution Associated Phenotypes* | Somatic Variant Associated Phenotypes* | PolyPhen-2 Prediction |
|----------------|-----------------|---------|-----------------|------------|------------------------------------------|----------------------------------------|-----------------------|
| 2216191        | <i>12S rRNA</i> | T710C   |                 |            |                                          | Colorectal tumor                       |                       |
| 2010-08-MT-830 | <i>12S rRNA</i> | T711C   |                 |            |                                          |                                        |                       |
| 200610-42      | <i>12S rRNA</i> | C722T   |                 |            |                                          |                                        |                       |
| 2216198        | <i>12S rRNA</i> | T921C   |                 |            | Possibly LVNC-associated                 |                                        |                       |
| 2216200        | <i>12S rRNA</i> | G951A   |                 |            |                                          |                                        |                       |
| 2216201        | <i>12S rRNA</i> | T961C   |                 |            | DEAF; Possibly LVNC-associated           |                                        |                       |
| 2216202        | <i>12S rRNA</i> | T1005C  |                 |            | DEAF                                     |                                        |                       |
| 2216203        | <i>12S rRNA</i> | G1018A  |                 |            |                                          |                                        |                       |
| 2010-08-MT-27  | <i>12S rRNA</i> | A1041G  |                 |            |                                          |                                        |                       |
| 2216204        | <i>12S rRNA</i> | C1048T  |                 |            |                                          |                                        |                       |
| 200610-108     | <i>12S rRNA</i> | T1107C  |                 |            |                                          |                                        |                       |
| 200610-109     | <i>12S rRNA</i> | T1119C  |                 |            |                                          |                                        |                       |
| 2216208        | <i>12S rRNA</i> | T1243C  |                 |            |                                          | Pancreatic cancer cell line            |                       |
| 2216209        | <i>12S rRNA</i> | A1382C  |                 |            |                                          |                                        |                       |
| 2216210        | <i>12S rRNA</i> | G1393A  |                 |            |                                          |                                        |                       |
| 2216211        | <i>12S rRNA</i> | T1406C  |                 |            |                                          | Pancreatic cancer cell line            |                       |
| 2216212        | <i>12S rRNA</i> | T1413C  |                 |            |                                          |                                        |                       |
| 2216213        | <i>12S rRNA</i> | A1438G  |                 |            |                                          |                                        |                       |
| 2216214        | <i>12S rRNA</i> | G1442A  |                 |            |                                          |                                        |                       |
| 2216216        | <i>16S rRNA</i> | G1664A  |                 |            |                                          |                                        |                       |
| 2216217        | <i>16S rRNA</i> | T1694C  |                 |            |                                          |                                        |                       |
| 2216218        | <i>16S rRNA</i> | T1700C  |                 |            |                                          |                                        |                       |
| 2216219        | <i>16S rRNA</i> | C1703T  |                 |            |                                          |                                        |                       |
| 2216220        | <i>16S rRNA</i> | C1706T  |                 |            |                                          |                                        |                       |
| 2216221        | <i>16S rRNA</i> | G1709A  |                 |            |                                          |                                        |                       |
| 2216222        | <i>16S rRNA</i> | T1717C  |                 |            |                                          |                                        |                       |
| rs3928305      | <i>16S rRNA</i> | G1719A  |                 |            |                                          |                                        |                       |

| ID             | Gene            | Variant | Type of Variant | Amino Acid | Base Substitution Associated Phenotypes* | Somatic Variant Associated Phenotypes*                          | PolyPhen-2 Prediction |
|----------------|-----------------|---------|-----------------|------------|------------------------------------------|-----------------------------------------------------------------|-----------------------|
| 2010-08-MT-526 | <i>16S rRNA</i> | C1721T  |                 |            |                                          | Acute leukemia platelets, leukocytes, & bone marrow             |                       |
| 2216228        | <i>16S rRNA</i> | A1811G  |                 |            |                                          | Head/neck tumor                                                 |                       |
| 2216231        | <i>16S rRNA</i> | A1842G  |                 |            |                                          |                                                                 |                       |
| 2216232        | <i>16S rRNA</i> | G1888A  |                 |            |                                          |                                                                 |                       |
| 2216234        | <i>16S rRNA</i> | G2056A  |                 |            |                                          | Bladder tumor; Acute leukemia; Platelets/leukocytes/bone marrow |                       |
| 2216238        | <i>16S rRNA</i> | C2218T  |                 |            |                                          |                                                                 |                       |
| 2216239        | <i>16S rRNA</i> | C2259T  |                 |            |                                          |                                                                 |                       |
| 2216240        | <i>16S rRNA</i> | C2283T  |                 |            |                                          |                                                                 |                       |
| 2216241        | <i>16S rRNA</i> | C2332T  |                 |            |                                          |                                                                 |                       |
| 2216242        | <i>16S rRNA</i> | T2352C  |                 |            | Possibly LVNC-associated                 |                                                                 |                       |
| 2216243        | <i>16S rRNA</i> | A2358G  |                 |            |                                          |                                                                 |                       |
| 2216244        | <i>16S rRNA</i> | T2416C  |                 |            |                                          |                                                                 |                       |
| 2216249        | <i>16S rRNA</i> | A2706G  |                 |            |                                          |                                                                 |                       |
| 2216250        | <i>16S rRNA</i> | G2758A  |                 |            |                                          |                                                                 |                       |
| 2216251        | <i>16S rRNA</i> | A2768G  |                 |            |                                          |                                                                 |                       |
| 2216252        | <i>16S rRNA</i> | C2772T  |                 |            |                                          |                                                                 |                       |
| 2216254        | <i>16S rRNA</i> | G2831A  |                 |            |                                          |                                                                 |                       |
| 200610-2       | <i>16S rRNA</i> | A2880G  |                 |            |                                          |                                                                 |                       |
| 2216255        | <i>16S rRNA</i> | T2885C  |                 |            |                                          |                                                                 |                       |
| 2216256        | <i>16S rRNA</i> | G3010A  |                 |            | Cyclic vomiting syndrome with migraine   |                                                                 |                       |
| 2216257        | <i>16S rRNA</i> | T3027C  |                 |            |                                          |                                                                 |                       |
| 2216258        | <i>16S rRNA</i> | C3116T  |                 |            |                                          |                                                                 |                       |
| 2216259        | <i>16S rRNA</i> | T3197C  |                 |            |                                          |                                                                 |                       |
| 2216260        | <i>16S rRNA</i> | T3200A  |                 |            |                                          |                                                                 |                       |
| 2216261        | <i>16S rRNA</i> | C3206T  |                 |            |                                          |                                                                 |                       |
| 2216262        | <i>16S rRNA</i> | C3210T  |                 |            |                                          |                                                                 |                       |

| ID             | Gene | Variant | Type of Variant | Amino Acid | Base Substitution Associated Phenotypes*                 | Somatic Variant Associated Phenotypes*                 | PolyPhen-2 Prediction |
|----------------|------|---------|-----------------|------------|----------------------------------------------------------|--------------------------------------------------------|-----------------------|
| rs2853516      | ND1  | G3316A  | Nonsynonymous   | A4T        | Diabetes; LHON; PEO                                      |                                                        | Benign                |
| 2216265        | ND1  | T3338C  | Nonsynonymous   | V11A       |                                                          |                                                        | Benign                |
| 200610-4       | ND1  | A3384G  | Synonymous      | K26K       |                                                          |                                                        |                       |
| 2216266        | ND1  | T3394C  | Nonsynonymous   | Y30H       | LHON; Diabetes; CPT deficiency; High altitude adaptation | Acute leukemia platelets, leukocytes, & bone marrow    | Benign                |
| 200610-111     | ND1  | T3396C  | Synonymous      | Y30Y       | NSHL; MIDD                                               |                                                        |                       |
| 2216267        | ND1  | T3398C  | Nonsynonymous   | M31T       |                                                          | DMDF+HCM; GDM; Possibly LVNC cardiomyopathy-associated | Benign                |
| 2216268        | ND1  | A3434G  | Nonsynonymous   | Y43C       |                                                          | Prostate tumor                                         | Benign                |
| 2216269        | ND1  | C3497T  | Nonsynonymous   | A64V       | LHON                                                     |                                                        | Benign                |
| 2216271        | ND1  | A3547G  | Nonsynonymous   | I81V       |                                                          |                                                        | Benign                |
| 2216272        | ND1  | C3571T  | Nonsynonymous   | L89F       |                                                          |                                                        | Probably damaging     |
| 200610-112     | ND1  | T3644C  | Nonsynonymous   | V113A      | BD-associated                                            |                                                        | Benign                |
| 200610-113     | ND1  | T3645C  | Synonymous      | V113V      |                                                          |                                                        |                       |
| 2263308        | ND1  | G3736A  | Nonsynonymous   | V144I      | LHON                                                     |                                                        | Benign                |
| 2216273        | ND1  | C3746T  | Nonsynonymous   | A147V      |                                                          |                                                        | Benign                |
| 200610-114     | ND1  | T3826C  | Synonymous      | L174L      |                                                          |                                                        |                       |
| 2216274        | ND1  | T3866C  | Nonsynonymous   | I187T      | LHON + limb claudication                                 |                                                        | Benign                |
| 200610-45      | ND1  | C3921T  | Synonymous      | S205S      |                                                          |                                                        |                       |
| 2216277        | ND1  | A4021G  | Nonsynonymous   | T239A      |                                                          |                                                        | Benign                |
| 200610-115     | ND1  | T4023C  | Synonymous      | T239T      |                                                          |                                                        |                       |
| 200610-47      | ND1  | C4025T  | Nonsynonymous   | T240M      |                                                          |                                                        | Benign                |
| 2010-08-MT-655 | ND1  | G4048A  | Nonsynonymous   | D248N      |                                                          |                                                        | Benign                |
| 2216280        | ND1  | A4093G  | Nonsynonymous   | T263A      |                                                          |                                                        | Benign                |
| 200610-116     | ND1  | T4117C  | Synonymous      | L271L      |                                                          |                                                        |                       |
| 2216281        | ND1  | A4123G  | Nonsynonymous   | I273V      |                                                          |                                                        | Benign                |
| 2216282        | ND1  | A4129G  | Nonsynonymous   | T275A      |                                                          |                                                        | Benign                |

| ID             | Gene            | Variant | Type of Variant | Amino Acid | Base Substitution Associated Phenotypes*                                                                    | Somatic Variant Associated Phenotypes*    | PolyPhen-2 Prediction |
|----------------|-----------------|---------|-----------------|------------|-------------------------------------------------------------------------------------------------------------|-------------------------------------------|-----------------------|
| 2010-08-MT-664 | <i>ND1</i>      | A4164G  | Synonymous      | M286M      |                                                                                                             |                                           |                       |
| 200610-117     | <i>ND1</i>      | T4218C  | Synonymous      | Y304Y      |                                                                                                             |                                           |                       |
| 2216284        | <i>tRNA-Ile</i> | C4312T  |                 |            |                                                                                                             | Thyroid tumor                             |                       |
| 200610-48      | <i>tRNA-Gln</i> | C4335T  |                 |            |                                                                                                             |                                           |                       |
| rs41456348     | <i>tRNA-Gln</i> | T4336C  |                 |            | AD; PD; Hearing loss & migraine<br>Possibly associated with DEAF + RP<br>+developmental delay; Hypertension |                                           |                       |
| 2216286        | <i>tRNA-Gln</i> | T4363C  |                 |            |                                                                                                             |                                           |                       |
| 2216291        | <i>ND2</i>      | G4491A  | Nonsynonymous   | V8I        |                                                                                                             |                                           | Benign                |
| 200610-49      | <i>ND2</i>      | C4508T  | Synonymous      | I13I       |                                                                                                             |                                           |                       |
| 2216294        | <i>ND2</i>      | A4732G  | Nonsynonymous   | N88S       |                                                                                                             |                                           | Benign                |
| 200610-6       | <i>ND2</i>      | A4833G  | Nonsynonymous   | T122A      | Diabetes helper mutation; AD; PD; Haplogroup G marker<br>LHON; Insulin resistance;                          |                                           | Possibly damaging     |
| 2263338        | <i>ND2</i>      | A4917G  | Nonsynonymous   | N150D      | AMD; NRTI-PN; Haplogroup T marker                                                                           |                                           | Benign                |
| 200610-120     | <i>ND2</i>      | T5108C  | Synonymous      | T213T      |                                                                                                             |                                           |                       |
| 200610-7       | <i>ND2</i>      | A5301G  | Nonsynonymous   | I278V      |                                                                                                             |                                           | Benign                |
| 2216303        | <i>ND2</i>      | C5331A  | Nonsynonymous   | L288I      |                                                                                                             |                                           | Benign                |
| rs3021088      | <i>ND2</i>      | G5460A  | Nonsynonymous   | A331T      | AD; PD<br>Mitochondrial encephalopathy; L2b marker                                                          |                                           | Benign                |
| 2216317        | <i>tRNA-Cys</i> | T5814C  |                 |            |                                                                                                             | MNGIE tissues                             |                       |
| 200610-9       | <i>tRNA-Tyr</i> | A5833G  |                 |            |                                                                                                             |                                           |                       |
| 2010-08-MT-773 | <i>CO1</i>      | T5999C  | Synonymous      | A32A       |                                                                                                             | Pancreatic cancer cell line; Glioblastoma |                       |
| 2010-08-MT-776 | <i>CO1</i>      | A6047G  | Synonymous      | L48L       |                                                                                                             | Pancreatic cancer cell line; Glioblastoma |                       |



| ID             | Gene            | Variant | Type of Variant | Amino Acid | Base Substitution Associated Phenotypes * | Somatic Variant Associated Phenotypes * | PolyPhen-2 Prediction |
|----------------|-----------------|---------|-----------------|------------|-------------------------------------------|-----------------------------------------|-----------------------|
| 200610-51      | CO1             | C6077T  | Synonymous      | V58V       |                                           |                                         |                       |
| 200610-121     | CO1             | T6248C  | Synonymous      | S115S      |                                           |                                         |                       |
| 2216322        | CO1             | T6253C  | Nonsynonymous   | M117T      | Prostate cancer; Enriched in POAG cohort  |                                         | Benign                |
| 2216323        | CO1             | G6261A  | Nonsynonymous   | A120T      | Prostate cancer; LHON                     |                                         | Probably damaging     |
| 2216324        | CO1             | G6267A  | Nonsynonymous   | A122T      | Prostate cancer                           | Pancreatic cancer cell line             | Benign                |
| 200610-80      | CO1             | G6285A  | Nonsynonymous   | V128I      | Prostate cancer                           |                                         | Benign                |
| 200610-123     | CO1             | T6392C  | Synonymous      | N163N      |                                           |                                         |                       |
| 200610-81      | CO1             | G6446A  | Synonymous      | T181T      |                                           |                                         |                       |
| 2216325        | CO1             | G6480A  | Nonsynonymous   | V193I      | Prostate cancer; Enriched in POAG cohort  |                                         | Benign                |
| 2263312        | CO1             | A6663G  | Nonsynonymous   | I254V      | Prostate cancer                           |                                         | Benign                |
| 200610-82      | CO1             | G6734A  | Synonymous      | M277M      |                                           |                                         |                       |
| 2263313        | CO1             | A6982G  | Nonsynonymous   | N360S      |                                           |                                         | Probably damaging     |
| 2010-08-MT-831 | CO1             | T7142C  | Synonymous      | H413H      |                                           |                                         |                       |
| 2216332        | <i>tRNA-Ser</i> | C7476T  |                 |            |                                           | Thyroid hyperplasia                     |                       |
| 200610-84      | CO2             | G7598A  | Nonsynonymous   | A5T        | Possible LHON helper variant              |                                         | Benign                |
| 2010-08-MT-860 | CO2             | T7684C  | Synonymous      | L33L       |                                           |                                         |                       |
| 2010-08-MT-861 | CO2             | G7697A  | Nonsynonymous   | V38I       | Possible HCM susceptibility               |                                         | Benign                |
| 2010-08-MT-874 | CO2             | G7853A  | Nonsynonymous   | V90I       |                                           |                                         | Benign                |
| 200610-86      | CO2             | G7859A  | Nonsynonymous   | D92N       | Progressive encephalomyopathy             |                                         | Benign                |
| 200610-128     | CO2             | T7870C  | Synonymous      | L95L       |                                           |                                         |                       |
| 200610-13      | CO2             | A7972G  | Synonymous      | E129E      |                                           |                                         |                       |
| 200610-87      | CO2             | G8020A  | Synonymous      | P145P      |                                           |                                         |                       |
| 200610-129     | ATP8            | T8404C  | Synonymous      | I13I       |                                           |                                         |                       |

| ID             | Gene        | Variant | Type of Variant | Amino Acid | Base Substitution Associated Phenotypes *               | Somatic Variant Associated Phenotypes * | PolyPhen-2 Prediction |
|----------------|-------------|---------|-----------------|------------|---------------------------------------------------------|-----------------------------------------|-----------------------|
| 2216340        | <i>ATP8</i> | C8414T  | Nonsynonymous   | L17F       | Longevity                                               |                                         | Probably damaging     |
| 2216341        | <i>ATP8</i> | C8417T  | Nonsynonymous   | L18F       |                                                         |                                         | Probably damaging     |
| 2216342        | <i>ATP8</i> | A8460G  | Nonsynonymous   | N32S       |                                                         |                                         | Possibly damaging     |
| 2216343        | <i>ATP8</i> | C8478T  | Nonsynonymous   | S38L       |                                                         |                                         | Benign                |
| 200610-14      | <i>ATP8</i> | A8502G  | Nonsynonymous   | N46S       |                                                         |                                         | Possibly damaging     |
| 2263319        | <i>ATP6</i> | C8684T  | Nonsynonymous   | T53I       |                                                         |                                         | Benign                |
| 2263340        | <i>ATP6</i> | A8701G  | Nonsynonymous   | T59A       |                                                         | Thyroid tumors                          | Benign                |
| 200610-131     | <i>ATP6</i> | T8793C  | Synonymous      | P89P       |                                                         |                                         |                       |
| 2263320        | <i>ATP6</i> | G8857A  | Nonsynonymous   | G111S      |                                                         |                                         | Benign                |
| 200610-55      | <i>ATP6</i> | C8859T  | Synonymous      | G111G      |                                                         |                                         |                       |
| 2216358        | <i>ATP6</i> | A8860G  | Nonsynonymous   | T112A      |                                                         |                                         | Benign                |
| 2216360        | <i>ATP6</i> | T8875C  | Nonsynonymous   | F117L      |                                                         |                                         | Benign                |
| 2216361        | <i>ATP6</i> | G8896A  | Nonsynonymous   | A124T      |                                                         |                                         | Benign                |
| 2216362        | <i>ATP6</i> | A8923G  | Nonsynonymous   | T133A      |                                                         |                                         | Probably damaging     |
| 200610-18      | <i>ATP6</i> | A8946G  | Synonymous      | M140M      |                                                         |                                         |                       |
| 200610-56      | <i>ATP6</i> | C8964T  | Synonymous      | T146T      |                                                         |                                         |                       |
| 200610-89      | <i>ATP6</i> | G9064A  | Nonsynonymous   | A180T      |                                                         |                                         | Benign                |
| 2216368        | <i>ATP6</i> | T9098C  | Nonsynonymous   | I191T      | Predisposition to anti-retroviral mitochondrial disease |                                         | Probably damaging     |
| 2216369        | <i>ATP6</i> | T9128C  | Nonsynonymous   | I201T      |                                                         |                                         | Benign                |
| 200610-57      | <i>ATP6</i> | C9140T  | Nonsynonymous   | A205V      |                                                         |                                         | Probably damaging     |
| 2216370        | <i>ATP6</i> | G9142A  | Nonsynonymous   | V206I      |                                                         |                                         | Benign                |
| 2010-08-MT-969 | <i>ATP6</i> | A9150G  | Synonymous      | L208L      |                                                         |                                         |                       |
| 200610-58      | <i>CO3</i>  | C9458T  | Synonymous      | I84I       |                                                         |                                         |                       |
| rs2853825      | <i>CO3</i>  | G9477A  | Nonsynonymous   | V91I       |                                                         | Thyroid tumor                           | Benign                |
| 200610-21      | <i>CO3</i>  | A9587G  | Synonymous      | L127L      |                                                         |                                         |                       |
| 2216375        | <i>CO3</i>  | T9682C  | Nonsynonymous   | M159T      |                                                         |                                         | Benign                |
| 200610-59      | <i>CO3</i>  | C9785T  | Synonymous      | Y193Y      |                                                         |                                         |                       |
| 2263321        | <i>CO3</i>  | G9804A  | Nonsynonymous   | A200T      | LHON                                                    | Pancreatic cancer cell line             | Benign                |

| ID          | Gene            | Variant | Type of Variant | Amino Acid | Base Substitution Associated Phenotypes * | Somatic Variant Associated Phenotypes * | PolyPhen-2 Prediction |
|-------------|-----------------|---------|-----------------|------------|-------------------------------------------|-----------------------------------------|-----------------------|
| 2216376     | <i>CO3</i>      | A9855G  | Nonsynonymous   | I217V      |                                           |                                         | Benign                |
| 2216377     | <i>CO3</i>      | T9903C  | Nonsynonymous   | F233L      |                                           |                                         | Probably damaging     |
| 2216378     | <i>CO3</i>      | G9966A  | Nonsynonymous   | V254I      |                                           |                                         | Benign                |
| 2216379     | <i>tRNA-Gly</i> | T10007C |                 |            |                                           |                                         |                       |
| 2216380     | <i>tRNA-Gly</i> | T10031C |                 |            |                                           |                                         |                       |
| 2263322     | <i>tRNA-Gly</i> | T10034C |                 |            |                                           |                                         |                       |
| 2216384     | <i>ND3</i>      | A10086G | Nonsynonymous   | N10D       | Hypertensive end-stage renal disease      |                                         | Probably damaging     |
| 200610-133  | <i>ND3</i>      | T10118C | Synonymous      | I20I       |                                           |                                         |                       |
| 2216385     | <i>ND3</i>      | G10143A | Nonsynonymous   | G29S       |                                           |                                         | Benign                |
| 2216386     | <i>ND3</i>      | T10321C | Nonsynonymous   | V88A       |                                           | Bladder tumor                           | Benign                |
| 2216387     | <i>ND3</i>      | T10345C | Nonsynonymous   | I96T       |                                           |                                         | Benign                |
| 200610-22   | <i>ND3</i>      | A10397G | Synonymous      | W113W      |                                           |                                         |                       |
| 2216389     | <i>tRNA-Arg</i> | T10410C |                 |            |                                           |                                         |                       |
| rs28358279  | <i>tRNA-Arg</i> | T10463C |                 |            |                                           | Endometrium tumor                       |                       |
| MitoA10551G | <i>ND4L</i>     | A10550G | Synonymous      | M27M       |                                           | Endometrial control tissue              |                       |
| 200610-60   | <i>ND4L</i>     | C10607T | Synonymous      | L46L       |                                           |                                         |                       |
| 2216391     | <i>ND4L</i>     | T10609C | Nonsynonymous   | M47T       |                                           |                                         | Benign                |
| 200610-135  | <i>ND4L</i>     | T10640C | Synonymous      | N57N       |                                           | Endometrium tumor                       |                       |
| 200610-23   | <i>ND4L</i>     | A10754G | Synonymous      | L95L       |                                           |                                         |                       |
| 200610-92   | <i>ND4</i>      | G11016A | Nonsynonymous   | S86N       |                                           | Thyroid tumor                           | Benign                |
| 2216394     | <i>ND4</i>      | T11025C | Nonsynonymous   | L89P       |                                           |                                         | Benign                |
| 200610-61   | <i>ND4</i>      | C11061T | Nonsynonymous   | S101F      |                                           |                                         | Benign                |
| 2216396     | <i>ND4</i>      | A11172G | Nonsynonymous   | N138S      |                                           |                                         | Probably damaging     |
| 2216397     | <i>ND4</i>      | C11177T | Nonsynonymous   | P140S      |                                           |                                         | Probably damaging     |
| 2216398     | <i>ND4</i>      | T11204C | Nonsynonymous   | F149L      |                                           |                                         | Benign                |
| MitoA11252G | <i>ND4</i>      | A11251G | Synonymous      | L164L      |                                           |                                         |                       |
| 2216399     | <i>ND4</i>      | T11253C | Nonsynonymous   | I165T      | LHON; PD                                  |                                         | Benign                |
| 200610-63   | <i>ND4</i>      | C11288T | Synonymous      | L177L      |                                           |                                         |                       |
| MitoA11468G | <i>ND4</i>      | A11467G | Synonymous      | L236L      | Altered brain pH; sCJD patients           |                                         |                       |

| ID             | Gene             | Variant | Type of Variant | Amino Acid | Base Substitution Associated Phenotypes*                                                             | Somatic Variant Associated Phenotypes*                 | PolyPhen-2 Prediction |
|----------------|------------------|---------|-----------------|------------|------------------------------------------------------------------------------------------------------|--------------------------------------------------------|-----------------------|
| 200610-65      | <i>ND4</i>       | C11536T | Synonymous      | Y259Y      |                                                                                                      |                                                        |                       |
| 2010-08-MT-82  | <i>ND4</i>       | A11560G | Synonymous      | W267W      |                                                                                                      |                                                        |                       |
| 2216400        | <i>ND4</i>       | G11696A | Nonsynonymous   | V313I      | LHON; LDYT; DEAF; Hypertension helper mutation                                                       |                                                        | Benign                |
| 200610-25      | <i>ND4</i>       | A11959G | Synonymous      | M400M      |                                                                                                      |                                                        |                       |
| 2216401        | <i>ND4</i>       | G11963A | Nonsynonymous   | V402I      |                                                                                                      |                                                        | Benign                |
| 2216402        | <i>ND4</i>       | G11969A | Nonsynonymous   | A404T      |                                                                                                      |                                                        | Benign                |
| 2216403        | <i>ND4</i>       | T11984C | Nonsynonymous   | Y409H      |                                                                                                      |                                                        | Probably damaging     |
| 200610-136     | <i>ND4</i>       | T12121C | Synonymous      | I454I      |                                                                                                      |                                                        |                       |
| 2216406        | <i>tRNA-Ser</i>  | G12236A |                 |            | DEAF                                                                                                 | Thyroid tumor                                          |                       |
| 2216407        | <i>tRNA-Ser</i>  | A12248G |                 |            |                                                                                                      |                                                        |                       |
| 200610-137     | <i>tRNA-Leu2</i> | T12285C |                 |            |                                                                                                      |                                                        |                       |
| rs2853498      | <i>tRNA-Leu2</i> | A12308G |                 |            | CPEO; Stroke; CM; Breast, Renal, & Prostate cancer risk; Altered brain pH; sCJD; Haplogroup U marker | Endometrium control tissue; Lung tumor; Prostate tumor |                       |
| 2216417        | <i>ND5</i>       | G12454A | Nonsynonymous   | V40I       |                                                                                                      |                                                        | Benign                |
| 2216418        | <i>ND5</i>       | C12542T | Nonsynonymous   | A69V       |                                                                                                      |                                                        | Possibly damaging     |
| 2010-08-MT-143 | <i>ND5</i>       | A12642G | Synonymous      | E102E      |                                                                                                      |                                                        |                       |
| 200610-94      | <i>ND5</i>       | G12771A | Synonymous      | E145E      |                                                                                                      |                                                        |                       |
| 2263325        | <i>ND5</i>       | G12820A | Nonsynonymous   | A162T      |                                                                                                      |                                                        | Benign                |
| 200610-27      | <i>ND5</i>       | A12822G | Synonymous      | A162A      |                                                                                                      |                                                        |                       |
| 2263326        | <i>ND5</i>       | A12937G | Nonsynonymous   | M201V      |                                                                                                      |                                                        | Benign                |
| 2216420        | <i>ND5</i>       | G12940A | Nonsynonymous   | A202T      |                                                                                                      |                                                        | Benign                |
| 2216421        | <i>ND5</i>       | A12950G | Nonsynonymous   | N205S      |                                                                                                      |                                                        | Benign                |
| 2216422        | <i>ND5</i>       | A13105G | Nonsynonymous   | I257V      |                                                                                                      |                                                        | Benign                |
| 2216423        | <i>ND5</i>       | G13135A | Nonsynonymous   | A267T      | Possible HCM susceptibility                                                                          |                                                        | Benign                |

| ID             | Gene       | Variant | Type of Variant       | Amino Acid      | Base Substitution Associated Phenotypes *                                | Somatic Variant Associated Phenotypes *                           | PolyPhen-2 Prediction |
|----------------|------------|---------|-----------------------|-----------------|--------------------------------------------------------------------------|-------------------------------------------------------------------|-----------------------|
| 200610-30      | ND5        | A13183G | Nonsynonymous         | I283V           |                                                                          |                                                                   | Benign                |
| 200610-138     | ND5        | T13215C | Synonymous            | L293L           |                                                                          |                                                                   |                       |
| 2216424        | ND5        | A13276G | Nonsynonymous         | M314V           |                                                                          |                                                                   | Benign                |
| rs28359178     | ND5        | G13708A | Nonsynonymous         | A458T           | LHON; Increased MS risk; Higher frequency in PD-ADS; Haplogroup J marker | Acute leukemia platelets, leukocytes, & bone marrow; Breast tumor | Benign                |
| 2010-08-MT-204 | ND5        | G13759A | Nonsynonymous         | A475T           |                                                                          |                                                                   | Benign                |
| 2263327        | ND5        | A13780G | Nonsynonymous         | I482V           |                                                                          |                                                                   | Benign                |
| 2216429        | ND5        | T13789C | Nonsynonymous         | Y485H           |                                                                          |                                                                   | Probably damaging     |
| 2216431        | ND5        | C13880A | Nonsynonymous         | S515Y           |                                                                          |                                                                   | Possibly damaging     |
| 2216432        | ND5        | T13886C | Nonsynonymous         | L517P           |                                                                          |                                                                   | Benign                |
| 2216433        | ND5        | C13924T | Nonsynonymous         | P530S           |                                                                          |                                                                   | Probably damaging     |
| 2216434        | ND5        | A13933G | Nonsynonymous         | T533A           |                                                                          |                                                                   | Benign                |
| 2263328        | ND5        | C13934T | Nonsynonymous         | T533M           |                                                                          |                                                                   | Benign                |
| 2216436        | ND5        | A13942G | Nonsynonymous         | T536A           |                                                                          |                                                                   | Benign                |
| 2216437        | Non-coding | G13958C | Nonsynonymous         | G541A           |                                                                          |                                                                   | Possibly damaging     |
| 2263329        | ND5        | A13966G | Nonsynonymous         | T544A           |                                                                          |                                                                   | Benign                |
| 2216439        | ND5        | C13981T | Nonsynonymous         | P549S           |                                                                          |                                                                   | Benign                |
| 2216440        | ND5        | T14000A | Nonsynonymous         | L555Q           |                                                                          |                                                                   | Probably damaging     |
| 200610-139     | ND5        | T14025C | Synonymous            | P563P           |                                                                          |                                                                   |                       |
| 2216441        | ND5        | A14053G | Nonsynonymous         | T573A           |                                                                          | Prostate tumor                                                    | Benign                |
| 2216442        | ND5        | A14059G | Nonsynonymous         | I575V           |                                                                          |                                                                   | Benign                |
| 2216443        | ND5        | A14148G | Premature Termination | Term60<br>4Term |                                                                          |                                                                   |                       |
| 2216444        | ND6        | T14178C | Nonsynonymous         | I166V           |                                                                          |                                                                   | Benign                |
| 2010-08-MT-232 | ND6        | T14182C | Synonymous            | V164V           |                                                                          |                                                                   |                       |
| 2216446        | ND6        | G14258A | Nonsynonymous         | P139L           |                                                                          |                                                                   | Benign                |
| 2216447        | ND6        | T14318C | Nonsynonymous         | N119S           |                                                                          |                                                                   | Benign                |
| 200610-96      | ND6        | G14323A | Synonymous            | N117N           |                                                                          |                                                                   |                       |

| ID             | Gene | Variant | Type of Variant | Amino Acid | Base Substitution Associated Phenotypes *       | Somatic Variant Associated Phenotypes *         | PolyPhen-2 Prediction |
|----------------|------|---------|-----------------|------------|-------------------------------------------------|-------------------------------------------------|-----------------------|
| 200610-71      | ND6  | C14338T | Synonymous      | V112V      |                                                 |                                                 |                       |
| 2010-08-MT-251 | ND6  | A14417G | Nonsynonymous   | V86A       |                                                 | Papillary thyroid carcinoma                     | Benign                |
| 2216448        | ND6  | T14502C | Nonsynonymous   | I58V       | LHON                                            |                                                 | Benign                |
| 200610-141     | ND6  | T14512C | Synonymous      | M54M       |                                                 |                                                 |                       |
| 200610-97      | ND6  | G14544A | Synonymous      | L44L       |                                                 |                                                 |                       |
| 200610-98      | ND6  | G14569A | Synonymous      | S35S       |                                                 |                                                 |                       |
| 2263330        | ND6  | A14687G |                 |            | Mitochondrial myopathy with respiratory failure | Mitochondrial myopathy with respiratory failure |                       |
| 2263331        | CYB  | A14793G | Nonsynonymous   | H16R       |                                                 |                                                 | Benign                |
| rs28357681     | CYB  | T14798C | Nonsynonymous   | F18L       |                                                 | Glioblastoma                                    | Benign                |
| 2216456        | CYB  | G14861A | Nonsynonymous   | A39T       |                                                 |                                                 | Benign                |
| 2010-08-MT-288 | CYB  | C14872T | Synonymous      | I42I       |                                                 |                                                 |                       |
| 200610-33      | CYB  | A14890G | Synonymous      | G48G       |                                                 |                                                 |                       |
| 200610-34      | CYB  | A14893G | Synonymous      | L49L       |                                                 |                                                 |                       |
| 2216457        | CYB  | A14927G | Nonsynonymous   | T61A       |                                                 |                                                 | Benign                |
| 2216458        | CYB  | A14978G | Nonsynonymous   | I78V       |                                                 |                                                 | Benign                |
| 2216459        | CYB  | T14979C | Nonsynonymous   | I78T       |                                                 |                                                 | Benign                |
| 2216460        | CYB  | A15038G | Nonsynonymous   | I98V       |                                                 |                                                 | Possibly damaging     |
| 2216461        | CYB  | T15071C | Nonsynonymous   | Y109H      |                                                 |                                                 | Benign                |
| 2216462        | CYB  | T15074C | Nonsynonymous   | S110P      |                                                 |                                                 | Benign                |
| 2216463        | CYB  | G15077A | Nonsynonymous   | E111K      | DEAF                                            |                                                 | Probably damaging     |
| 2263332        | CYB  | G15119A | Nonsynonymous   | A125T      |                                                 |                                                 | Benign                |
| 200610-99      | CYB  | G15148A | Synonymous      | P134P      |                                                 |                                                 |                       |
| 200610-100     | CYB  | G15172A | Synonymous      | G142G      |                                                 | Endometrial tumor                               |                       |
| 2216465        | CYB  | T15204C | Nonsynonymous   | I153T      |                                                 |                                                 | Benign                |
| rs2853506      | CYB  | A15218G | Nonsynonymous   | T158A      |                                                 |                                                 | Possibly damaging     |
| 2216467        | CYB  | A15236G | Nonsynonymous   | I164V      |                                                 |                                                 | Benign                |
| 2216468        | CYB  | G15257A | Nonsynonymous   | D171N      | LHON; Haplogroup J2 marker                      |                                                 | Benign                |
| 2263333        | CYB  | C15263T | Nonsynonymous   | P173S      |                                                 |                                                 | Benign                |

| ID         | Gene            | Variant | Type of Variant | Amino Acid | Base Substitution Associated Phenotypes*       | Somatic Variant Associated Phenotypes* | PolyPhen-2 Prediction |
|------------|-----------------|---------|-----------------|------------|------------------------------------------------|----------------------------------------|-----------------------|
| 2216470    | CYB             | G15314A | Nonsynonymous   | A190T      |                                                |                                        | Benign                |
| 2216471    | CYB             | G15323A | Nonsynonymous   | A193T      |                                                |                                        | Benign                |
| 2216472    | CYB             | A15326G | Nonsynonymous   | T194A      |                                                |                                        | Benign                |
| 2216473    | CYB             | C15381T | Nonsynonymous   | T212I      |                                                |                                        | Benign                |
| 2216474    | CYB             | C15402T | Nonsynonymous   | T219I      |                                                |                                        | Possibly damaging     |
| 2216475    | CYB             | G15431A | Nonsynonymous   | A229T      |                                                |                                        | Benign                |
| rs3088309  | CYB             | C15452A | Nonsynonymous   | L236I      |                                                |                                        | Benign                |
| 2216478    | CYB             | T15479C | Nonsynonymous   | F245L      |                                                |                                        | Benign                |
| 200610-35  | CYB             | A15487T | Synonymous      | P247P      |                                                |                                        |                       |
| 2216479    | CYB             | G15497A | Nonsynonymous   | G251S      | EXIT; Obesity                                  |                                        | Benign                |
| 200610-143 | CYB             | T15514C | Synonymous      | Y256Y      |                                                |                                        |                       |
| 2216481    | CYB             | A15662G | Nonsynonymous   | I306V      | Complex mitochondriopathy-associated           | Breast tumor                           | Benign                |
| 2216482    | CYB             | T15672C | Nonsynonymous   | M309T      |                                                | Breast tumor                           | Benign                |
| 2263334    | CYB             | T15693C | Nonsynonymous   | M316T      | Possibly LVNC cardiomyopathy-associated        | Breast tumor                           | Benign                |
| rs41337244 | CYB             | A15758G | Nonsynonymous   | I338V      |                                                |                                        | Benign                |
| 2216485    | CYB             | G15812A | Nonsynonymous   | V356M      | LHON                                           |                                        | Benign                |
| 2216486    | CYB             | A15824G | Nonsynonymous   | T360A      |                                                | Breast tumor                           | Benign                |
| 2216487    | CYB             | C15849T | Nonsynonymous   | T368I      |                                                | Breast tumor                           | Benign                |
| 2216489    | CYB             | A15860G | Nonsynonymous   | I372V      |                                                |                                        | Benign                |
| 2263335    | <i>tRNA-Thr</i> | T15889C |                 |            |                                                |                                        |                       |
| 2263341    | <i>tRNA-Thr</i> | C15904T |                 |            |                                                |                                        |                       |
| 2216491    | <i>tRNA-Thr</i> | T15905C |                 |            |                                                |                                        |                       |
| 2216492    | <i>tRNA-Thr</i> | A15907G |                 |            |                                                |                                        |                       |
| rs2853510  | <i>tRNA-Thr</i> | A15924G |                 |            |                                                |                                        |                       |
| 2216494    | <i>tRNA-Thr</i> | G15927A |                 |            | LIMM<br>MS; DEAF1555 increased penetrance; CHD |                                        |                       |

| ID             | Gene            | Variant | Type of Variant | Amino Acid | Base Substitution Associated Phenotypes*         | Somatic Variant Associated Phenotypes* | PolyPhen-2 Prediction |
|----------------|-----------------|---------|-----------------|------------|--------------------------------------------------|----------------------------------------|-----------------------|
| 2263337        | <i>tRNA-Thr</i> | G15928A |                 |            | MS; Idiopathic repeat miscarriage; AD protection |                                        |                       |
| 2216495        | <i>tRNA-Thr</i> | C15939T |                 |            |                                                  |                                        |                       |
| 2263336        | <i>tRNA-Thr</i> | T15940C |                 |            |                                                  |                                        |                       |
| 2216496        | <i>tRNA-Thr</i> | T15941C |                 |            |                                                  |                                        |                       |
| 2216497        | <i>tRNA-Thr</i> | T15942C |                 |            | Possibly LVNC-associated                         |                                        |                       |
| 2216498        | <i>tRNA-Thr</i> | C15946T |                 |            |                                                  |                                        |                       |
| 2216499        | <i>tRNA-Thr</i> | A15951G |                 |            | LHON modulator                                   |                                        |                       |
| 2216500        | <i>tRNA-Pro</i> | C15978T |                 |            |                                                  |                                        |                       |
| 2216501        | <i>tRNA-Pro</i> | T16017C |                 |            |                                                  |                                        |                       |
| 2010-08-MT-395 | Non-coding      | C16069T |                 |            |                                                  |                                        |                       |
| 2010-08-MT-398 | Non-coding      | T16086C |                 |            |                                                  |                                        |                       |
| 200610-146     | Non-coding      | T16217C |                 |            |                                                  | Prostate tumor                         |                       |
| rs41378955     | Non-coding      | G16390A |                 |            | POAG- potential for association                  | Breast, ovarian tumor                  |                       |
| 2010-08-MT-511 | Non-coding      | A16399G |                 |            |                                                  | Gastric carcinoma                      |                       |
| 200610-37      | Non-coding      | A16482G |                 |            |                                                  |                                        |                       |

\*MITOMAP

ND = NADH dehydrogenase; CYB = Cytochrome b; CO = Cytochrome c oxidase; ATP = ATP synthase; POLG = Mitochondrial DNA polymerase  $\gamma$ ; MNGIE = Mitochondrial neurogastrointestinal encephalopathy; LVNC = Left ventricular non-compaction cardiomyopathy; DEAF = Deafness; LHON = Leber Hereditary optic neuropathy; PEO = Progressive external ophthalmoplegia; CPT = Carnitine palmityltransferase deficiency; DMDF = Diabetes mellitus and deafness; HCM = Hypertrophic cardiomyopathy; GDM = Gestational diabetes mellitus; AD = Alzheimer's disease; PD = Parkinson's disease; RP = Retinitis pigmentosa; AMD = Age-related macular degeneration; POAG = Primary open angle glaucoma; LDYT = Leber hereditary optic neuropathy and dystonia; CM = Cardiomyopathy; sCJD = Sporadic Creutzfeldt-Jakob disease; MS = Multiple sclerosis; PD-ADS = Acquired demyelinating syndromes; HCM = Hypertrophic cardiomyopathy; EXIT = Exercise intolerance; LIMM = Lethal infantile mitochondrial myopathy; CHD = Coronary heart disease



**Table S18.** Infinium Human Exome v1.2

| ID         | Gene             | Variant | Type of Variant | Amino Acid | Base Substitution Associated Phenotypes*                                                                                    | Somatic Variant Associated Phenotypes*                                  | PolyPhen-2 Prediction |
|------------|------------------|---------|-----------------|------------|-----------------------------------------------------------------------------------------------------------------------------|-------------------------------------------------------------------------|-----------------------|
| rs41531144 | Non-coding       | T217C   |                 |            |                                                                                                                             |                                                                         |                       |
| rs41323649 | Non-coding       | G228A   |                 |            |                                                                                                                             |                                                                         |                       |
| rs41528348 | Non-coding       | C295T   |                 |            |                                                                                                                             | POLG/MNGIE muscle;<br>Glioblastoma                                      |                       |
| rs3901846  | Non-coding       | G499A   |                 |            |                                                                                                                             | Thyroid & prostate tumors                                               |                       |
| rs3928305  | <i>16S rRNA</i>  | G1719A  |                 |            |                                                                                                                             |                                                                         |                       |
| rs2853516  | <i>ND1</i>       | G3316A  | Nonsynonymous   | A4T        | Diabetes; LHON; PEO<br>AD; PD; Hearing loss &<br>migraine                                                                   |                                                                         | Benign                |
| rs41456348 | <i>tRNA-Gln</i>  | T4336C  |                 |            |                                                                                                                             |                                                                         |                       |
| rs3021088  | <i>ND2</i>       | G5460A  | Nonsynonymous   | A331T      | AD; PD                                                                                                                      |                                                                         | Benign                |
| rs2853825  | <i>COX3</i>      | G9477A  | Nonsynonymous   | V91I       |                                                                                                                             | Thyroid tumor                                                           | Benign                |
| rs2853826  | <i>ND3</i>       | A10398G | Nonsynonymous   | T114A      | PD protective factor;<br>Longevity; Altered cell pH;<br>Metabolic syndrome;<br>Breast cancer risk;<br>Haplogroup IJK marker | Thyroid tumor                                                           | Benign                |
| rs28358279 | <i>tRNA-Arg</i>  | T10463C |                 |            |                                                                                                                             | Endometrium tumor                                                       |                       |
| rs2853498  | <i>tRNA-Leu2</i> | A12308G |                 |            | CPEO; Stroke; CM; Breast,<br>Renal, & Prostate cancer<br>risk; Altered brain pH; sCJD;<br>Haplogroup U marker               | Endometrium control<br>tissue; Lung & prostate<br>tumors                |                       |
| rs28359178 | <i>ND5</i>       | G13708A | Nonsynonymous   | A458T      | LHON; Increased MS risk;<br>Higher frequency in PD-<br>ADS; Haplogroup J marker                                             | Acute leukemia platelets,<br>leukocytes, & bone<br>marrow; Breast tumor | Benign                |
| rs28357681 | <i>CYB</i>       | T14798C | Nonsynonymous   | F18L       |                                                                                                                             | Glioblastoma                                                            | Benign                |
| rs2853506  | <i>CYB</i>       | A15218G | Nonsynonymous   | T158A      |                                                                                                                             |                                                                         | Possibly damaging     |
| rs3088309  | <i>CYB</i>       | C15452A | Nonsynonymous   | L236I      |                                                                                                                             |                                                                         | Benign                |
| rs41337244 | <i>CYB</i>       | A15758G | Nonsynonymous   | I338V      |                                                                                                                             |                                                                         | Benign                |

| ID         | Gene            | Variant | Type of Variant | Amino Acid | Base Substitution Associated Phenotypes* | Somatic Variant Associated Phenotypes* | PolyPhen-2 Prediction |
|------------|-----------------|---------|-----------------|------------|------------------------------------------|----------------------------------------|-----------------------|
| rs2853510  | <i>tRNA-Thr</i> | A15924G |                 |            | LIMM                                     |                                        |                       |
| rs41378955 | Non-coding      | G16390A |                 |            | POAG- potential for association          | Breast, ovarian tumor                  |                       |

\*MITOMAP

ND = NADH dehydrogenase; CYB = Cytochrome b; CO = Cytochrome c oxidase; ATP = ATP synthase; LHON = Leber Hereditary optic neuropathy; PEO = Progressive external ophthalmoplegia; AD = Alzheimer's disease; PD = Parkinson's disease; POLG = Mitochondrial DNA polymerase  $\gamma$ ; MNGIE = Mitochondrial neurogastrointestinal encephalopathy; CPEO = Chronic progressive external ophthalmoplegia syndrome; CM = Cardiomyopathy; sCJD = Sporadic Creutzfeldt-Jakob disease; MS = Multiple sclerosis; PD-ADS = Acquired demyelinating syndromes; LIMM = Lethal infantile mitochondrial myopathy; POAG = Primary open angle glaucoma

**Table S19.** Illumina Human Core 12v1

| ID             | Gene       | Variant | Type of Variant | Amino Acid | Base Substitution Associated Phenotypes* | Somatic Variant Associated Phenotypes*                  | PolyPhen-2 Prediction |
|----------------|------------|---------|-----------------|------------|------------------------------------------|---------------------------------------------------------|-----------------------|
| 2010-08-MT-841 | Non-Coding | T72C    |                 |            |                                          | Aging brains; POLG/PEO & control muscle; Normal tissues |                       |
| 2010-08-MT-981 | Non-Coding | A93G    |                 |            |                                          |                                                         |                       |
| 200610-102     | Non-Coding | T125C   |                 |            |                                          | POLG/PEO & control muscle                               |                       |
| 2010-08-MT-544 | Non-Coding | T199C   |                 |            |                                          | Ovarian carcinoma; POLG/MNGIE muscle                    |                       |
| 200610-104     | Non-Coding | T212C   |                 |            |                                          |                                                         |                       |
| 2010-08-MT-550 | Non-Coding | A215G   |                 |            |                                          | Control skeletal muscle; Esophageal cancer              |                       |

| ID             | Gene            | Variant | Type of Variant | Amino Acid | Base Substitution Associated Phenotypes* | Somatic Variant Associated Phenotypes* | PolyPhen-2 Prediction |
|----------------|-----------------|---------|-----------------|------------|------------------------------------------|----------------------------------------|-----------------------|
| MitoT217C      | Non-Coding      | T217C   |                 |            |                                          |                                        |                       |
| MitoG228A      | Non-Coding      | G228A   |                 |            |                                          |                                        |                       |
| 200610-105     | Non-Coding      | T236C   |                 |            |                                          |                                        |                       |
| 200610-106     | Non-Coding      | T246C   |                 |            |                                          |                                        |                       |
| MitoG247A      | Non-Coding      | G247A   |                 |            |                                          |                                        |                       |
| MitoC295T      | Non-Coding      | C295T   |                 |            |                                          | POLG/MNGIE muscle;                     |                       |
| MitoC458T      | Non-Coding      | C456T   |                 |            |                                          | glioblastoma                           |                       |
| MitoT479C      | Non-Coding      | T477C   |                 |            |                                          | Thyroid tumor                          |                       |
| 200610-107     | Non-Coding      | T482C   |                 |            |                                          | AD brains; Ovarian                     |                       |
| 2010-08-MT-830 | <i>12S rRNA</i> | T711C   |                 |            |                                          | tumor                                  |                       |
| 200610-42      | <i>12S rRNA</i> | C722T   |                 |            |                                          |                                        |                       |
| MitoG752A      | <i>12S rRNA</i> | A750G   |                 |            | SZ-associated                            |                                        |                       |
| 2010-08-MT-27  | <i>12S rRNA</i> | A1041G  |                 |            |                                          |                                        |                       |
| 200610-108     | <i>12S rRNA</i> | T1107C  |                 |            |                                          |                                        |                       |
| 200610-109     | <i>12S rRNA</i> | T1119C  |                 |            |                                          |                                        |                       |
| MitoT1191C     | <i>12S rRNA</i> | T1189C  |                 |            |                                          |                                        |                       |
| 2010-08-MT-526 | <i>16S rRNA</i> | C1721T  |                 |            |                                          | Acute leukemia                         |                       |
| MitoA1738G     | <i>16S rRNA</i> | A1736G  |                 |            |                                          | platelets, leukocytes, &               |                       |
| MitoC2485T     | <i>16S rRNA</i> | T2483C  |                 |            |                                          | bone marrow                            |                       |
| 200610-2       | <i>16S rRNA</i> | A2880G  |                 |            |                                          |                                        |                       |
| MitoT2887C     | <i>16S rRNA</i> | T2885C  |                 |            |                                          |                                        |                       |
| MitoG3012A     | <i>16S rRNA</i> | G3010A  |                 |            | Cyclic vomiting syndrome with migraine   |                                        |                       |
| MitoA3349G     | <i>ND1</i>      | A3348G  | Synonymous      |            |                                          |                                        |                       |
| 200610-111     | <i>ND1</i>      | T3396C  | Synonymous      |            | NSHL; MIDD                               |                                        |                       |

| ID             | Gene            | Variant | Type of Variant | Amino Acid | Base Substitution Associated Phenotypes*              | Somatic Variant Associated Phenotypes* | PolyPhen-2 Prediction |
|----------------|-----------------|---------|-----------------|------------|-------------------------------------------------------|----------------------------------------|-----------------------|
| 200610-112     | <i>ND1</i>      | T3644C  | Nonsynonymous   | V113A      | BD-associated                                         |                                        | Benign                |
| 200610-113     | <i>ND1</i>      | T3645C  | Synonymous      |            |                                                       |                                        |                       |
| MitoG3667A     | <i>ND1</i>      | G3666A  | Synonymous      |            |                                                       |                                        |                       |
| MitoA3721G     | <i>ND1</i>      | A3720G  | Synonymous      |            |                                                       |                                        |                       |
| 200610-114     | <i>ND1</i>      | T3826C  | Synonymous      |            |                                                       |                                        |                       |
| MitoG3916A     | <i>ND1</i>      | G3915A  | Synonymous      |            |                                                       |                                        |                       |
| MitoG3919A     | <i>ND1</i>      | G3918A  | Synonymous      |            |                                                       | Breast tumor                           |                       |
| 200610-45      | <i>ND1</i>      | C3921T  | Synonymous      |            |                                                       |                                        |                       |
| MitoC3971T     | <i>ND1</i>      | C3970T  | Synonymous      |            |                                                       |                                        |                       |
| MitoC3993T     | <i>ND1</i>      | C3992T  | Nonsynonymous   | T229M      |                                                       | Thyroid tumor                          | Benign                |
| 200610-115     | <i>ND1</i>      | T4023C  | Synonymous      |            |                                                       |                                        |                       |
| MitoA4025G     | <i>ND1</i>      | A4024G  | Nonsynonymous   | T240A      |                                                       |                                        | Benign                |
| 200610-47      | <i>ND1</i>      | C4025T  | Nonsynonymous   | T240M      |                                                       |                                        | Benign                |
| 2010-08-MT-655 | <i>ND1</i>      | G4048A  | Nonsynonymous   | D248N      |                                                       |                                        | Benign                |
| 200610-116     | <i>ND1</i>      | T4117C  | Synonymous      |            |                                                       |                                        |                       |
| 2010-08-MT-664 | <i>ND1</i>      | A4164G  | Synonymous      |            |                                                       |                                        |                       |
| 200610-117     | <i>ND1</i>      | T4218C  | Synonymous      |            |                                                       |                                        |                       |
| 200610-48      | <i>tRNA-Gln</i> | C4335T  |                 |            |                                                       |                                        |                       |
| MitoT4337C     | <i>tRNA-Gln</i> | T4336C  |                 |            | AD; PD; Hearing loss & migraine                       |                                        |                       |
| 200610-49      | <i>ND2</i>      | C4508T  | Synonymous      |            |                                                       |                                        |                       |
| MitoG4770A     | <i>ND2</i>      | A4769G  | Synonymous      |            |                                                       |                                        |                       |
| MitoG4821A     | <i>ND2</i>      | G4820A  | Synonymous      |            |                                                       |                                        |                       |
| MitoA4825G     | <i>ND2</i>      | A4824G  | Nonsynonymous   | T119A      |                                                       |                                        | Possibly damaging     |
| 200610-6       | <i>ND2</i>      | A4833G  | Nonsynonymous   | T122A      | Diabetes helper mutation; AD; PD; Haplogroup G marker |                                        | Possibly damaging     |
| MitoA4918G     | <i>ND2</i>      | A4917G  | Nonsynonymous   | N150D      | LHON; Insulin resistance; AMD; NRTI-                  |                                        | Benign                |

| ID             | Gene            | Variant | Type of Variant | Amino Acid | Base Substitution Associated Phenotypes*<br>PN; Haplogroup T marker | Somatic Variant Associated Phenotypes*    | PolyPhen-2 Prediction |
|----------------|-----------------|---------|-----------------|------------|---------------------------------------------------------------------|-------------------------------------------|-----------------------|
| MitoT4978C     | <i>ND2</i>      | T4977C  | Synonymous      | L170L      |                                                                     |                                           |                       |
| MitoT5005C     | <i>ND2</i>      | T5004C  | Synonymous      | L179L      |                                                                     |                                           |                       |
| MitoG5047A     | <i>ND2</i>      | G5046A  | Nonsynonymous   | V193I      |                                                                     |                                           | Benign                |
| 200610-119     | <i>ND2</i>      | T5048C  | Synonymous      | V193V      |                                                                     |                                           |                       |
| 200610-120     | <i>ND2</i>      | T5108C  | Synonymous      | T213T      |                                                                     |                                           |                       |
| MitoC5264T     | <i>ND2</i>      | C5263T  | Nonsynonymous   | A265V      |                                                                     |                                           | Benign                |
| 200610-7       | <i>ND2</i>      | A5301G  | Nonsynonymous   | I278V      |                                                                     |                                           | Benign                |
| MitoA5391G     | <i>ND2</i>      | A5390G  | Synonymous      | M307M      |                                                                     |                                           |                       |
| MitoT5443C     | <i>ND2</i>      | T5442C  | Nonsynonymous   | F325L      |                                                                     |                                           | Benign                |
| MitoA5657G     | Non-Coding      | A5656G  |                 |            |                                                                     |                                           |                       |
| MitoG5774A     | <i>tRNA-Cys</i> | G5773A  |                 |            |                                                                     |                                           |                       |
| 200610-9       | <i>tRNA-Tyr</i> | A5833G  |                 |            |                                                                     |                                           |                       |
| MitoA5952G     | <i>CO1</i>      | A5951G  | Synonymous      | G16G       |                                                                     |                                           |                       |
| 2010-08-MT-773 | <i>CO1</i>      | T5999C  | Synonymous      | A32A       |                                                                     | Pancreatic cancer cell line; Glioblastoma |                       |
| MitoG6027A     | <i>CO1</i>      | G6026A  | Synonymous      | L41L       |                                                                     |                                           |                       |
| MitoC6046T     | <i>CO1</i>      | C6045T  | Synonymous      | L48L       |                                                                     |                                           |                       |
| 2010-08-MT-776 | <i>CO1</i>      | A6047G  | Synonymous      | L48L       |                                                                     | Pancreatic cancer cell line; Glioblastoma |                       |
| 200610-51      | <i>CO1</i>      | C6077T  | Synonymous      | V58V       |                                                                     |                                           |                       |
| MitoT6222C     | <i>CO1</i>      | T6221C  | Synonymous      | P106P      |                                                                     |                                           |                       |
| 200610-121     | <i>CO1</i>      | T6248C  | Synonymous      | S115S      |                                                                     |                                           |                       |
| MitoG6261A     | <i>CO1</i>      | G6260A  | Synonymous      | E119E      |                                                                     |                                           |                       |
| 200610-80      | <i>CO1</i>      | G6285A  | Nonsynonymous   | V128I      | Prostate cancer                                                     |                                           | Benign                |
| 200610-123     | <i>CO1</i>      | T6392C  | Synonymous      | N163N      |                                                                     |                                           |                       |
| 200610-81      | <i>CO1</i>      | G6446A  | Synonymous      | T181T      |                                                                     |                                           |                       |
| MitoT6681C     | <i>CO1</i>      | T6680C  | Synonymous      | T259T      |                                                                     |                                           |                       |
| 200610-82      | <i>CO1</i>      | G6734A  | Synonymous      | M277M      |                                                                     |                                           |                       |
| MitoT6777C     | <i>CO1</i>      | T6776C  | Synonymous      | H291H      |                                                                     | Breast cystic masses                      |                       |

| ID             | Gene            | Variant | Type of Variant | Amino Acid | Base Substitution Associated Phenotypes* | Somatic Variant Associated Phenotypes* | PolyPhen-2 Prediction |
|----------------|-----------------|---------|-----------------|------------|------------------------------------------|----------------------------------------|-----------------------|
| MitoA7056G     | <i>CO1</i>      | A7055G  | Synonymous      | G384G      |                                          | MNGIE fibroblasts                      |                       |
| 2010-08-MT-831 | <i>CO1</i>      | T7142C  | Synonymous      | H413H      |                                          |                                        |                       |
| MitoT7176C     | <i>CO1</i>      | T7175C  | Synonymous      | F414F      |                                          |                                        |                       |
| MitoC7275T     | <i>CO1</i>      | C7274T  | Synonymous      | G457G      |                                          |                                        |                       |
| MitoG7522A     | <i>tRNA-Asp</i> | G7521A  |                 |            |                                          | Thyroid tumor                          |                       |
| 200610-84      | <i>CO2</i>      | G7598A  | Nonsynonymous   | A5T        | Possible LHON helper variant             |                                        | Benign                |
| 2010-08-MT-860 | <i>CO2</i>      | T7684C  | Synonymous      | L33L       |                                          |                                        |                       |
| 2010-08-MT-861 | <i>CO2</i>      | G7697A  | Nonsynonymous   | V38I       | Possible HCM susceptibility              |                                        | Benign                |
| MitoA7769G     | <i>CO2</i>      | A7768G  | Synonymous      | M61M       |                                          |                                        |                       |
| 200610-85      | <i>CO2</i>      | G7852A  | Synonymous      | E89E       |                                          |                                        |                       |
| 2010-08-MT-874 | <i>CO2</i>      | G7853A  | Nonsynonymous   | V90I       |                                          |                                        | Benign                |
| 200610-86      | <i>CO2</i>      | G7859A  | Nonsynonymous   | D92N       | Progressive Encephalomyopathy            |                                        | Benign                |
| 200610-127     | <i>CO2</i>      | T7861C  | Synonymous      | D92D       |                                          |                                        |                       |
| 200610-128     | <i>CO2</i>      | T7870C  | Synonymous      | L95L       |                                          |                                        |                       |
| 200610-13      | <i>CO2</i>      | A7972G  | Synonymous      | E129E      |                                          |                                        |                       |
| 200610-87      | <i>CO2</i>      | G8020A  | Synonymous      | P145P      |                                          |                                        |                       |
| 200610-129     | <i>ATP8</i>     | T8404C  | Synonymous      | I13I       |                                          |                                        |                       |
| 200610-53      | <i>ATP8</i>     | C8472T  | Nonsynonymous   | P36L       |                                          |                                        | Benign                |
| 200610-14      | <i>ATP8</i>     | A8502G  | Nonsynonymous   | N46S       |                                          |                                        | Possibly damaging     |
| MitoG8617T     | <i>ATP8</i>     | G8616T  | Nonsynonymous   | L30F       |                                          |                                        | Unknown               |
| 200610-131     | <i>ATP6</i>     | T8793C  | Synonymous      | P89P       |                                          |                                        |                       |
| 200610-55      | <i>ATP6</i>     | C8859T  | Synonymous      | G111G      |                                          |                                        |                       |
| MitoA8870G     | <i>ATP6</i>     | A8869G  | Nonsynonymous   | M115V      |                                          |                                        | Benign                |
| 200610-18      | <i>ATP6</i>     | A8946G  | Synonymous      | M140M      |                                          |                                        |                       |
| 200610-56      | <i>ATP6</i>     | A8964T  | Nonsynonymous   | M140I      |                                          |                                        | Possibly damaging     |

| ID             | Gene            | Variant | Type of Variant | Amino Acid | Base Substitution Associated Phenotypes* | Somatic Variant Associated Phenotypes* | PolyPhen-2 Prediction |
|----------------|-----------------|---------|-----------------|------------|------------------------------------------|----------------------------------------|-----------------------|
| 200610-89      | <i>ATP6</i>     | G9064A  | Nonsynonymous   | A180T      |                                          |                                        | Benign                |
| MitoA9073G     | <i>ATP6</i>     | A9072G  | Synonymous      | S182S      |                                          |                                        |                       |
| MitoA9094G     | <i>ATP6</i>     | A9093G  | Synonymous      | T189T      |                                          |                                        |                       |
| 200610-57      | <i>ATP6</i>     | C9140T  | Nonsynonymous   | A205V      |                                          |                                        | Probably damaging     |
| 2010-08-MT-969 | <i>ATP6</i>     | A9150G  | Synonymous      | L208L      |                                          |                                        |                       |
| MitoG9378A     | <i>CO3</i>      | A9377G  | Synonymous      | W57W       |                                          |                                        |                       |
| 200610-58      | <i>CO3</i>      | C9458T  | Synonymous      | I84I       |                                          |                                        |                       |
| MitoC9541T     | <i>CO3</i>      | T9540C  | Synonymous      | L112L      |                                          |                                        |                       |
| 200610-21      | <i>CO3</i>      | A9587G  | Synonymous      | L127L      |                                          |                                        |                       |
| MitoA9668G     | <i>CO3</i>      | A9667G  | Nonsynonymous   | N154S      |                                          |                                        | Benign                |
| MitoT9699C     | <i>CO3</i>      | T9698C  | Synonymous      | L164L      |                                          |                                        |                       |
| MitoT9717C     | <i>CO3</i>      | T9716C  | Synonymous      | G170G      |                                          |                                        |                       |
| 200610-59      | <i>CO3</i>      | C9785T  | Synonymous      | Y193Y      |                                          |                                        |                       |
| MitoT9900C     | <i>CO3</i>      | T9899C  | Synonymous      | H231H      |                                          |                                        |                       |
| MitoT9951C     | <i>CO3</i>      | T9950C  | Synonymous      | V248V      |                                          |                                        |                       |
| MitoT10035C    | <i>tRNA-Gly</i> | T10034C |                 |            |                                          |                                        |                       |
| 200610-133     | <i>ND3</i>      | T10118C | Synonymous      | I20I       |                                          |                                        |                       |
| MitoT10239C    | <i>ND3</i>      | T10238C | Synonymous      | I60I       |                                          |                                        |                       |
| MitoG10311A    | <i>ND3</i>      | G10310A | Synonymous      | L84L       |                                          |                                        |                       |
| 200610-22      | <i>ND3</i>      | A10397G | Synonymous      | W113W      |                                          |                                        |                       |
| MitoA10551G    | <i>ND4L</i>     | A10550G | Synonymous      | M27M       |                                          | Endometrium control tissue             |                       |
| MitoG10587A    | <i>ND4L</i>     | G10586A | Synonymous      | S39S       |                                          |                                        |                       |
| MitoG10590A    | <i>ND4L</i>     | G10589A | Synonymous      | L40L       |                                          |                                        |                       |
| 200610-135     | <i>ND4L</i>     | T10640C | Synonymous      | N57N       |                                          | Endometrium tumor                      |                       |
| MitoG10689A    | <i>ND4L</i>     | G10688A | Synonymous      | V73V       |                                          |                                        |                       |
| 200610-23      | <i>ND4L</i>     | A10754G | Synonymous      | L95L       |                                          |                                        |                       |
| 200610-91      | <i>ND4</i>      | G10914A | Nonsynonymous   | C52Y       |                                          |                                        | Benign                |
| MitoT10916C    | <i>ND4</i>      | T10915C | Synonymous      | C52C       |                                          |                                        |                       |
| 200610-92      | <i>ND4</i>      | G11016A | Nonsynonymous   | S86N       |                                          | Thyroid tumor                          | Benign                |

| ID             | Gene             | Variant | Type of Variant | Amino Acid | Base Substitution Associated Phenotypes* | Somatic Variant Associated Phenotypes* | PolyPhen-2 Prediction |
|----------------|------------------|---------|-----------------|------------|------------------------------------------|----------------------------------------|-----------------------|
| 200610-61      | <i>ND4</i>       | C11061T | Nonsynonymous   | S101F      |                                          |                                        | Benign                |
| MitoA11252G    | <i>ND4</i>       | A11251G | Synonymous      | L164L      |                                          |                                        |                       |
| 200610-63      | <i>ND4</i>       | C11288T | Synonymous      | L177L      |                                          |                                        |                       |
| MitoG11378A    | <i>ND4</i>       | G11377A | Synonymous      | K206K      |                                          |                                        |                       |
| MitoA11468G    | <i>ND4</i>       | A11467G | Synonymous      | L236L      | Altered brain pH; sCJD                   |                                        |                       |
| 200610-65      | <i>ND4</i>       | C11536T | Synonymous      | Y259Y      |                                          |                                        |                       |
| 2010-08-MT-82  | <i>ND4</i>       | A11560G | Synonymous      | W267W      |                                          |                                        |                       |
| MitoT11900C    | <i>ND4</i>       | T11899C | Synonymous      | S380S      |                                          |                                        |                       |
| MitoG11915A    | <i>ND4</i>       | G11914A | Synonymous      | T385T      |                                          |                                        |                       |
| 200610-136     | <i>ND4</i>       | T12121C | Synonymous      | I454I      |                                          |                                        |                       |
| 200610-137     | <i>tRNA-Leu2</i> | T12285C |                 |            |                                          |                                        |                       |
| MitoG12631A    | <i>ND5</i>       | G12630A | Synonymous      | W98W       |                                          |                                        |                       |
| 2010-08-MT-143 | <i>ND5</i>       | A12642G | Synonymous      | E102E      |                                          |                                        |                       |
| MitoC12670T    | <i>ND5</i>       | C12669T | Synonymous      | D111D      |                                          |                                        |                       |
| MitoT12706C    | <i>ND5</i>       | C12705T | Synonymous      | I123I      |                                          | Prostate tumor                         |                       |
| 200610-94      | <i>ND5</i>       | G12771A | Synonymous      | E145E      |                                          |                                        |                       |
| 2010-08-MT-158 | <i>ND5</i>       | T12811C | Nonsynonymous   | Y159H      |                                          |                                        | Benign                |
| 200610-27      | <i>ND5</i>       | A12822G | Synonymous      | A162A      |                                          |                                        |                       |
| MitoG12851A    | <i>ND5</i>       | A12850G | Nonsynonymous   | I172V      |                                          |                                        | Possibly damaging     |
| MitoA13106G    | <i>ND5</i>       | A13105G | Nonsynonymous   | I257V      |                                          |                                        | Benign                |
| 200610-30      | <i>ND5</i>       | A13183G | Nonsynonymous   | I283V      |                                          |                                        | Benign                |
| 200610-138     | <i>ND5</i>       | T13215C | Synonymous      | L293L      |                                          |                                        |                       |
| MitoA13264G    | <i>ND5</i>       | A13263G | Synonymous      | Q309Q      |                                          |                                        |                       |
| MitoC13651T    | <i>ND5</i>       | C13650T | Synonymous      | P438P      |                                          |                                        |                       |
| 2010-08-MT-204 | <i>ND5</i>       | G13759A | Nonsynonymous   | A475T      |                                          |                                        | Benign                |
| MitoT13966C    | <i>ND5</i>       | T13965C | Synonymous      | L543L      |                                          |                                        |                       |



| ID             | Gene            | Variant | Type of Variant | Amino Acid | Base Substitution Associated Phenotypes*                                   | Somatic Variant Associated Phenotypes*    | PolyPhen-2 Prediction |
|----------------|-----------------|---------|-----------------|------------|----------------------------------------------------------------------------|-------------------------------------------|-----------------------|
| 2010-08-MT-226 | <i>ND5</i>      | A14133G | Synonymous      | L599L      |                                                                            |                                           |                       |
| 2010-08-MT-232 | <i>ND6</i>      | T14182C | Synonymous      | V164V      |                                                                            |                                           |                       |
| MitoA14234G    | <i>ND6</i>      | A14233G | Synonymous      | D147D      |                                                                            |                                           |                       |
| 200610-96      | <i>ND6</i>      | G14323A | Synonymous      | N117N      |                                                                            |                                           |                       |
| 200610-71      | <i>ND6</i>      | C14338T | Synonymous      | V112V      |                                                                            |                                           |                       |
| 2010-08-MT-251 | <i>ND6</i>      | A14417G | Nonsynonymous   | V86A       |                                                                            |                                           | Benign                |
| 200610-141     | <i>ND6</i>      | T14512C | Synonymous      | M54M       |                                                                            |                                           |                       |
| 200610-97      | <i>ND6</i>      | G14544A | Synonymous      | L44L       |                                                                            |                                           |                       |
| 200610-98      | <i>ND6</i>      | G14569A | Synonymous      | S35S       |                                                                            |                                           |                       |
| 2010-08-MT-288 | <i>CYB</i>      | C14872T | Synonymous      | I42I       |                                                                            |                                           |                       |
| 200610-33      | <i>CYB</i>      | A14890G | Synonymous      | G48G       |                                                                            |                                           |                       |
| 200610-34      | <i>CYB</i>      | A14893G | Synonymous      | L49L       |                                                                            |                                           |                       |
| MitoG15044A    | <i>CYB</i>      | G15043A | Synonymous      | G99G       | MDD-associated                                                             |                                           |                       |
| 200610-99      | <i>CYB</i>      | G15148A | Synonymous      | P134P      |                                                                            |                                           |                       |
| 200610-100     | <i>CYB</i>      | G15172A | Synonymous      | G142G      |                                                                            | Endometrial tumor                         |                       |
| MitoA15302G    | <i>CYB</i>      | G15301A | Synonymous      | L185L      |                                                                            | Tumor                                     |                       |
| 200610-143     | <i>CYB</i>      | T15514C | Synonymous      | Y256Y      |                                                                            |                                           |                       |
| MitoT15671C    | <i>CYB</i>      | T15670C | Synonymous      | H308H      |                                                                            |                                           |                       |
| MitoT15785C    | <i>CYB</i>      | T15784C | Synonymous      | P346P      | POAG-potential for association                                             | Pancreatic cancer cell line; Breast tumor |                       |
| MitoC15834T    | <i>CYB</i>      | C15833T | Synonymous      | L363L      |                                                                            |                                           |                       |
| MitoC15905T    | <i>tRNA-Thr</i> | C15904T |                 |            |                                                                            |                                           |                       |
| MitoA15925G    | <i>tRNA-Thr</i> | A15924G |                 |            |                                                                            |                                           |                       |
| MitoG15929A    | <i>tRNA-Thr</i> | G15928A |                 |            | MS; Idiopathic repeat miscarriage; AD protection; Possible helper mutation |                                           |                       |

| ID             | Gene            | Variant | Type of Variant | Amino Acid | Base Substitution Associated Phenotypes* | Somatic Variant Associated Phenotypes* | PolyPhen-2 Prediction |
|----------------|-----------------|---------|-----------------|------------|------------------------------------------|----------------------------------------|-----------------------|
| MitoG15931A    | <i>tRNA-Thr</i> | G15930A |                 |            |                                          |                                        |                       |
| 2010-08-MT-395 | Non-Coding      | C16069T |                 |            |                                          |                                        |                       |
| 2010-08-MT-398 | Non-Coding      | T16086C |                 |            |                                          |                                        |                       |
| MitoG16130A    | Non-Coding      | G16129A |                 |            | Cyclic vomiting syndrome with migraine   |                                        |                       |
| MitoT16145C    | Non-Coding      | T16144C |                 |            |                                          |                                        |                       |
| MitoG16146A    | Non-Coding      | G16145A |                 |            |                                          |                                        |                       |
| MitoC16149T    | Non-Coding      | C16148T |                 |            |                                          | Aging brains                           |                       |
| MitoA16163G    | Non-Coding      | A16162G |                 |            |                                          |                                        |                       |
| MitoA16164G    | Non-Coding      | A16163G |                 |            |                                          |                                        |                       |
| 200610-146     | Non-Coding      | T16217C |                 |            |                                          | Prostate tumor                         |                       |
| MitoC16272T    | Non-Coding      | C16270T |                 |            | Melanoma patients                        |                                        |                       |
| 2010-08-MT-502 | Non-Coding      | T16356C |                 |            |                                          | Glioblastoma                           |                       |
| 2010-08-MT-504 | Non-Coding      | T16362C |                 |            |                                          |                                        |                       |
| MitoG16393A    | Non-Coding      | G16391A |                 |            |                                          |                                        |                       |
| 2010-08-MT-511 | Non-Coding      | A16399G |                 |            |                                          | Gastric carcinoma                      |                       |
| 200610-37      | Non-Coding      | A16482G |                 |            |                                          |                                        |                       |

\*MITOMAP

ND = NADH dehydrogenase; CYB = Cytochrome b; CO = Cytochrome c oxidase; ATP = ATP synthase; POLG = Mitochondrial DNA polymerase  $\gamma$ ; PEO = Progressive external ophthalmoplegia; MNGIE = Mitochondrial neurogastrointestinal encephalopathy; AD = Alzheimer's disease; SZ = Schizophrenia; NSHL = Non-syndromic hearing loss; MIDD = Maternally inherited diabetes and deafness; BD = Bipolar disorder; PD = Parkinson's disease; LHON = Leber Hereditary optic neuropathy; AMD = Age-related macular degeneration; NRTI = Nucleoside reverse transcriptase inhibitor; HCM = Hypertrophic cardiomyopathy; sCJD = Sporadic Creutzfeldt-Jaokob disease; MDD = Major depressive disorder; POAG = Primary open angle glaucoma; MS = Multiple sclerosis

**Table S20.** Illumina Human1M Duo v3

| ID         | Gene            | Variant | Type of Variant | Amino Acid | Base Substitution Associated Phenotypes* | Somatic Variant Associated Phenotypes* | PolyPhen-2 Prediction |
|------------|-----------------|---------|-----------------|------------|------------------------------------------|----------------------------------------|-----------------------|
| MitoT217C  | Non-Coding      | T217C   |                 |            |                                          |                                        |                       |
| MitoG228A  | Non-Coding      | G228A   |                 |            |                                          |                                        |                       |
| MitoG247A  | Non-Coding      | G247A   |                 |            |                                          |                                        |                       |
| MitoC295T  | Non-Coding      | C295T   |                 |            |                                          | POLG/MNGIE muscle;<br>Glioblastoma     |                       |
| MitoC458T  | Non-Coding      | C456T   |                 |            |                                          | Thyroid tumor                          |                       |
| MitoC464T  | Non-Coding      | C462T   |                 |            |                                          | Thyroid tumor                          |                       |
| MitoT479C  | Non-Coding      | T477C   |                 |            |                                          | AD brains; Ovarian tumor               |                       |
| MitoT491C  | Non-Coding      | T489C   |                 |            |                                          | Ovarian carcinoma;<br>Prostate tumor   |                       |
| MitoG752A  | <i>12S rRNA</i> | A750G   |                 |            |                                          |                                        |                       |
| MitoA829G  | <i>12S rRNA</i> | A827G   |                 |            | DEAF; Haplogroup B4b'd marker            |                                        |                       |
| MitoC1050T | <i>12S rRNA</i> | C1048T  |                 |            |                                          |                                        |                       |
| MitoT1191C | <i>12S rRNA</i> | T1189C  |                 |            |                                          |                                        |                       |
| MitoG1440A | <i>12S rRNA</i> | A1438G  |                 |            |                                          |                                        |                       |
| MitoG1721A | <i>16S rRNA</i> | G1719A  |                 |            |                                          |                                        |                       |
| MitoA1738G | <i>16S rRNA</i> | A1736G  |                 |            |                                          |                                        |                       |
| MitoT2160C | <i>16S rRNA</i> | T2158C  |                 |            |                                          |                                        |                       |
| MitoC2485T | <i>16S rRNA</i> | T2483C  |                 |            |                                          |                                        |                       |
| MitoG2708A | <i>16S rRNA</i> | A2706G  |                 |            |                                          |                                        |                       |
| MitoC2791T | <i>16S rRNA</i> | C2789T  |                 |            |                                          |                                        |                       |
| MitoT2887C | <i>16S rRNA</i> | T2885C  |                 |            |                                          |                                        |                       |
| MitoG3012A | <i>16S rRNA</i> | G3010A  |                 |            | Cyclic vomiting syndrome with migraine   |                                        |                       |
| MitoT3198C | <i>16S rRNA</i> | T3197C  |                 |            |                                          |                                        |                       |
| MitoA3349G | <i>ND1</i>      | A3348G  | Synonymous      | L14L       |                                          |                                        |                       |

| ID         | Gene            | Variant | Type of Variant | Amino Acid | Base Substitution Associated Phenotypes *                   | Somatic Variant Associated Phenotypes *             | PolyPhen-2 Prediction |
|------------|-----------------|---------|-----------------|------------|-------------------------------------------------------------|-----------------------------------------------------|-----------------------|
| MitoT3395C | <i>ND1</i>      | T3394C  | Nonsynonymous   | Y30H       | LHON/Diabetes/CPT deficiency/High altitude adaptation       | Acute leukemia platelets, leukocytes, & bone marrow | Benign                |
| MitoA3481G | <i>ND1</i>      | A3480G  | Synonymous      | K58K       |                                                             | Prostate tumor                                      |                       |
| MitoC3595T | <i>ND1</i>      | C3594T  | Synonymous      | V96V       |                                                             | Thyroid tumor                                       |                       |
| MitoG3667A | <i>ND1</i>      | G3666A  | Synonymous      | G120G      |                                                             |                                                     |                       |
| MitoA3721G | <i>ND1</i>      | A3720G  | Synonymous      | Q138Q      |                                                             |                                                     |                       |
| MitoG3916A | <i>ND1</i>      | G3915A  | Synonymous      | G203G      |                                                             |                                                     |                       |
| MitoG3919A | <i>ND1</i>      | G3918A  | Synonymous      | E204E      |                                                             | Breast tumor                                        |                       |
| MitoC3971T | <i>ND1</i>      | C3970T  | Synonymous      | L222L      |                                                             |                                                     |                       |
| MitoC3993T | <i>ND1</i>      | C3992T  | Nonsynonymous   | T229M      |                                                             |                                                     | Benign                |
| MitoA4025G | <i>ND1</i>      | A4024G  | Nonsynonymous   | T240A      |                                                             |                                                     | Benign                |
| MitoT4337C | <i>tRNA-Gln</i> | T4336C  |                 |            | AD; PD; Hearing loss & migraine                             |                                                     |                       |
| MitoT4562C | <i>ND2</i>      | T4561C  | Nonsynonymous   | V31A       |                                                             |                                                     | Benign                |
| MitoG4770A | <i>ND2</i>      | A4769G  | Synonymous      | M100M      |                                                             |                                                     |                       |
| MitoG4821A | <i>ND2</i>      | G4820A  | Synonymous      | E117E      |                                                             |                                                     |                       |
| MitoA4825G | <i>ND2</i>      | A4824G  | Nonsynonymous   | T119A      |                                                             |                                                     | Possibly damaging     |
| MitoC4884T | <i>ND2</i>      | C4883T  | Synonymous      | P138P      | Glaucoma                                                    |                                                     |                       |
| MitoA4918G | <i>ND2</i>      | A4917G  | Nonsynonymous   | N150D      | LHON; Insulin resistance; AMD; NRTI-PN; Haplogroup T marker |                                                     | Benign                |
| MitoT4978C | <i>ND2</i>      | T4977C  | Synonymous      | L170L      |                                                             |                                                     |                       |
| MitoT5005C | <i>ND2</i>      | T5004C  | Synonymous      | L179L      |                                                             |                                                     |                       |
| MitoG5047A | <i>ND2</i>      | G5046A  | Nonsynonymous   | V193I      |                                                             |                                                     | Benign                |
| MitoC5264T | <i>ND2</i>      | C5263T  | Nonsynonymous   | A265V      |                                                             |                                                     | Benign                |
| MitoA5391G | <i>ND2</i>      | A5390G  | Synonymous      | M307M      |                                                             |                                                     |                       |
| MitoT5443C | <i>ND2</i>      | T5442C  | Nonsynonymous   | F325L      |                                                             |                                                     | Benign                |
| MitoG5461A | <i>ND2</i>      | G5460A  | Nonsynonymous   | A331T      | AD; PD                                                      |                                                     | Benign                |

| ID         | Gene            | Variant | Type of Variant | Amino Acid          | Base Substitution Associated Phenotypes * | Somatic Variant Associated Phenotypes * | PolyPhen-2 Prediction |
|------------|-----------------|---------|-----------------|---------------------|-------------------------------------------|-----------------------------------------|-----------------------|
| MitoT5496C | <i>ND2</i>      | T5495C  | Synonymous      | F342F               |                                           |                                         |                       |
| MitoA5657G | <i>NC</i>       | A5656G  |                 |                     |                                           |                                         |                       |
| MitoG5774A | <i>tRNA-Cys</i> | G5773A  |                 |                     |                                           |                                         |                       |
| MitoA5952G | <i>CO1</i>      | A5951G  | Synonymous      | G16G                |                                           |                                         |                       |
| MitoG6027A | <i>CO1</i>      | G6026A  | Synonymous      | L41L                |                                           |                                         |                       |
| MitoC6046T | <i>CO1</i>      | C6045T  | Synonymous      | L48L                |                                           |                                         |                       |
| MitoT6153C | <i>CO1</i>      | T6152C  | Synonymous      | V83V                |                                           |                                         |                       |
| MitoT6222C | <i>CO1</i>      | T6221C  | Synonymous      | P106P               |                                           |                                         |                       |
| MitoG6261A | <i>CO1</i>      | G6260A  | Synonymous      | E119E               |                                           |                                         |                       |
| MitoT6681C | <i>CO1</i>      | T6680C  | Synonymous      | T259T               |                                           |                                         |                       |
| MitoG6735A | <i>CO1</i>      | G6734A  | Synonymous      | M277<br>M           |                                           |                                         |                       |
| MitoA6753G | <i>CO1</i>      | A6752G  | Synonymous      | L283L               |                                           |                                         |                       |
| MitoT6777C | <i>CO1</i>      | T6776C  | Synonymous      | H291H               |                                           | Breast cystic masses                    |                       |
| MitoA7056G | <i>CO1</i>      | A7055G  | Synonymous      | G384G               |                                           | MNGIE fibroblasts                       |                       |
| MitoT7176C | <i>CO1</i>      | T7175C  | Synonymous      | T424T               |                                           |                                         |                       |
| MitoC7275T | <i>CO1</i>      | C7274T  | Synonymous      | G457G               |                                           |                                         |                       |
| MitoG7522A | <i>tRNA-Asp</i> | G7521A  |                 |                     |                                           | Thyroid tumor                           |                       |
| MitoA7769G | <i>CO2</i>      | A7768G  | Synonymous      | M61M                |                                           |                                         |                       |
| MitoG8270A | <i>CO2</i>      | G8269A  | Synonymous      | Term2<br>28Ter<br>m |                                           |                                         |                       |
| MitoT8278C | Non-Coding      | T8277C  |                 |                     |                                           |                                         |                       |
| MitoG8617T | <i>ATP6</i>     | G8616T  | Nonsynonymous   | L30F                |                                           |                                         | Probably damaging     |
| MitoC8656T | <i>ATP6</i>     | C8655T  | Synonymous      | I43I                |                                           |                                         |                       |
| MitoA8870G | <i>ATP6</i>     | A8869G  | Nonsynonymous   | M115V               |                                           |                                         | Benign                |
| MitoA9073G | <i>ATP6</i>     | A9072G  | Synonymous      | S182S               |                                           |                                         |                       |
| MitoA9094G | <i>ATP6</i>     | A9093G  | Synonymous      | T189T               |                                           |                                         |                       |
| MitoG9378A | <i>CO3</i>      | A9377G  | Synonymous      | W57W                |                                           |                                         |                       |
| MitoC9541T | <i>CO3</i>      | T9540C  | Synonymous      | L112L               |                                           | Tumor                                   |                       |
| MitoA9668G | <i>CO3</i>      | A9667G  | Nonsynonymous   | N154S               |                                           |                                         | Benign                |
| MitoT9699C | <i>CO3</i>      | T9698C  | Synonymous      | L164L               |                                           |                                         |                       |

| ID          | Gene             | Variant | Type of Variant | Amino Acid | Base Substitution Associated Phenotypes *                                                                       | Somatic Variant Associated Phenotypes *           | PolyPhen-2 Prediction |
|-------------|------------------|---------|-----------------|------------|-----------------------------------------------------------------------------------------------------------------|---------------------------------------------------|-----------------------|
| MitoT9717C  | <i>CO3</i>       | T9716C  | Synonymous      | G170G      |                                                                                                                 |                                                   |                       |
| MitoT9900C  | <i>CO3</i>       | T9899C  | Synonymous      | H231H      |                                                                                                                 |                                                   |                       |
| MitoT9951C  | <i>CO3</i>       | T9950C  | Synonymous      | V248V      |                                                                                                                 |                                                   |                       |
| MitoT10035C | <i>tRNA-Gly</i>  | T10034C |                 |            |                                                                                                                 |                                                   |                       |
| MitoA10045G | <i>tRNA-Gly</i>  | A10044G |                 |            | SIDS                                                                                                            |                                                   |                       |
| MitoT10239C | <i>ND3</i>       | T10238C | Synonymous      | I60I       |                                                                                                                 |                                                   |                       |
| MitoG10311A | <i>ND3</i>       | G10310A | Synonymous      | L84L       |                                                                                                                 |                                                   |                       |
| MitoT10322C | <i>ND3</i>       | T10321C | Nonsynonymous   | V88A       |                                                                                                                 |                                                   | Benign                |
| MitoG10399A | <i>ND3</i>       | A10398G | Nonsynonymous   | T114A      | PD protective factor; Longevity; Altered cell pH; Metabolic syndrome; Breast cancer risk; Haplogroup IJK marker | Thyroid tumor                                     | Benign                |
| MitoT10464C | <i>tRNA-Arg</i>  | T10463C |                 |            |                                                                                                                 | Endometrium tumor                                 |                       |
| MitoA10551G | <i>ND4L</i>      | A10550G | Synonymous      | M27M       |                                                                                                                 | Endometrium control tissue                        |                       |
| MitoG10587A | <i>ND4L</i>      | G10586A | Synonymous      | S39S       |                                                                                                                 |                                                   |                       |
| MitoG10590A | <i>ND4L</i>      | G10589A | Synonymous      | L40L       |                                                                                                                 |                                                   |                       |
| MitoG10689A | <i>ND4L</i>      | G10688A | Synonymous      | V73V       |                                                                                                                 |                                                   |                       |
| MitoC10874T | <i>ND4</i>       | T10873C | Synonymous      | P38P       |                                                                                                                 |                                                   |                       |
| MitoT10916C | <i>ND4</i>       | T10915C | Synonymous      | C52C       |                                                                                                                 |                                                   |                       |
| MitoA11252G | <i>ND4</i>       | A11251G | Synonymous      | L164L      |                                                                                                                 |                                                   |                       |
| MitoG11378A | <i>ND4</i>       | G11377A | Synonymous      | K206K      |                                                                                                                 |                                                   |                       |
| MitoA11468G | <i>ND4</i>       | A11467G | Synonymous      | L236L      | Altered brain pH; sCJD patients                                                                                 |                                                   |                       |
| MitoT11486C | <i>ND4</i>       | T11485C | Synonymous      | G242G      |                                                                                                                 |                                                   |                       |
| MitoT11900C | <i>ND4</i>       | T11899C | Synonymous      | S380S      |                                                                                                                 |                                                   |                       |
| MitoG11915A | <i>ND4</i>       | G11914A | Synonymous      | T385T      |                                                                                                                 |                                                   |                       |
| MitoA12309G | <i>tRNA-Leu2</i> | A12308G |                 |            | CPEO; Stroke; CM; Breast, renal, & prostate cancer Risk; Altered                                                | Endometrium control tissue; Lung & prostate tumor |                       |

| ID          | Gene            | Variant | Type of Variant | Amino Acid | Base Substitution Associated Phenotypes *                        | Somatic Variant Associated Phenotypes *      | PolyPhen-2 Prediction       |
|-------------|-----------------|---------|-----------------|------------|------------------------------------------------------------------|----------------------------------------------|-----------------------------|
| MitoG12373A | <i>ND5</i>      | G12372A | Synonymous      | L12L       | brain pH; sCJD;<br>Haplogroup U marker<br>Altered brain pH; sCJD | Prostate tumor                               |                             |
| MitoG12631A | <i>ND5</i>      | G12630A | Synonymous      | W98W       |                                                                  |                                              |                             |
| MitoC12670T | <i>ND5</i>      | C12669T | Synonymous      | D111D      |                                                                  |                                              |                             |
| MitoT12706C | <i>ND5</i>      | C12705T | Synonymous      | I123I      |                                                                  |                                              |                             |
| MitoG12851A | <i>ND5</i>      | A12850G | Nonsynonymous   | I172V      |                                                                  | Prostate tumor                               | Possibly damaging<br>Benign |
| MitoA13106G | <i>ND5</i>      | A13105G | Nonsynonymous   | I257V      |                                                                  |                                              |                             |
| MitoA13264G | <i>ND5</i>      | A13263G | Synonymous      | Q309Q      |                                                                  |                                              |                             |
| MitoC13651T | <i>ND5</i>      | C13650T | Synonymous      | P438P      |                                                                  |                                              |                             |
| MitoA13781G | <i>ND5</i>      | A13780G | Nonsynonymous   | I482V      |                                                                  |                                              |                             |
| MitoT13790C | <i>ND5</i>      | T13789C | Nonsynonymous   | Y485H      |                                                                  |                                              |                             |
| MitoT13966C | <i>ND5</i>      | T13965C | Synonymous      | L543L      |                                                                  |                                              |                             |
| MitoT14179C | <i>ND6</i>      | T14178C | Nonsynonymous   | I166V      |                                                                  |                                              |                             |
| MitoA14234G | <i>ND6</i>      | A14233G | Synonymous      | D147D      |                                                                  |                                              |                             |
| MitoA14583G | <i>ND6</i>      | A14582G | Nonsynonymous   | V31A       |                                                                  |                                              |                             |
| MitoT14799C | <i>CYB</i>      | T14798C | Nonsynonymous   | F18L       | Glioblastoma                                                     | Benign                                       |                             |
| MitoG15044A | <i>CYB</i>      | G15043A | Synonymous      | G99G       |                                                                  |                                              |                             |
| MitoA15245G | <i>CYB</i>      | A15244G | Synonymous      | G166G      | MDD-associated                                                   |                                              |                             |
| MitoG15258A | <i>CYB</i>      | G15257A | Nonsynonymous   | D171N      |                                                                  |                                              |                             |
| MitoA15302G | <i>CYB</i>      | G15301A | Synonymous      | L185L      | LHON; Haplogroup J2<br>marker                                    | tumor<br>Breast tumor<br>Breast tumor        |                             |
| MitoC15536T | <i>CYB</i>      | C15535T | Synonymous      | N263N      |                                                                  |                                              |                             |
| MitoT15671C | <i>CYB</i>      | T15670C | Synonymous      | H308H      |                                                                  |                                              |                             |
| MitoA15759G | <i>CYB</i>      | A15758G | Nonsynonymous   | I338V      |                                                                  |                                              |                             |
| MitoT15785C | <i>CYB</i>      | T15784C | Synonymous      | P346P      | POAG-potential for<br>association                                | Pancreatic cancer cell<br>line; Breast tumor |                             |
| MitoC15834T | <i>CYB</i>      | C15833T | Synonymous      | L363L      |                                                                  |                                              |                             |
| MitoC15905T | <i>tRNA-Thr</i> | C15904T |                 |            | LIMM                                                             |                                              |                             |
| MitoA15925G | <i>tRNA-Thr</i> | A15924G |                 |            |                                                                  |                                              |                             |

| ID          | Gene            | Variant | Type of Variant | Amino Acid | Base Substitution Associated Phenotypes *        | Somatic Variant Associated Phenotypes * | PolyPhen-2 Prediction |
|-------------|-----------------|---------|-----------------|------------|--------------------------------------------------|-----------------------------------------|-----------------------|
| MitoG15929A | <i>tRNA-Thr</i> | G15928A |                 |            | MS; Idiopathic repeat miscarriage; AD protection |                                         |                       |
| MitoG15931A | <i>tRNA-Thr</i> | G15930A |                 |            |                                                  |                                         |                       |
| MitoG16130A | Non-Coding      | G16129A |                 |            | Cyclic vomiting syndrome with migraine           |                                         |                       |
| MitoT16145C | Non-Coding      | T16144C |                 |            |                                                  |                                         |                       |
| MitoG16146A | Non-Coding      | G16145A |                 |            |                                                  |                                         |                       |
| MitoC16149T | Non-Coding      | C16148T |                 |            |                                                  | Aging brains                            |                       |
| MitoA16163G | Non-Coding      | A16162G |                 |            |                                                  |                                         |                       |
| MitoA16164G | Non-Coding      | A16163G |                 |            |                                                  |                                         |                       |
| MitoC16184A | Non-Coding      | A16183G |                 |            |                                                  | Prostate tumor                          |                       |
| MitoC16272T | Non-Coding      | C16270T |                 |            | Melanoma patients                                |                                         |                       |
| MitoC16329T | Non-Coding      | C16327T |                 |            |                                                  |                                         |                       |
| MitoG16392A | Non-Coding      | G16390A |                 |            | POAG-potential for association                   | Breast & ovarian tumors                 |                       |
| MitoG16393A | Non-Coding      | G16391A |                 |            |                                                  |                                         |                       |

\*MITOMAP

ND = NADH dehydrogenase; CYB = Cytochrome b; CO = Cytochrome c oxidase; ATP = ATP synthase; POLG = Mitochondrial DNA polymerase  $\gamma$ ; MNGIE = Mitochondrial neurogastrointestinal encephalopathy; AD = Alzheimer's disease; DEAF = Deafness; LHON = Leber Hereditary optic neuropathy; CPT = Carnitine palmitoyltransferase deficiency; PD = Parkinson's disease; AMD = Age-related macular degeneration; NRTI = Nucleoside reverse transcriptase inhibitors; SIDS = Sudden infant death syndrome; sCJD = Sporadic Creutzfeldt-Jakob disease; CPEO = Chronic progressive external ophthalmoplegia syndrome; CM = Cardiomyopathy; MDD = Major depressive disorder; POAG = Primary open angle glaucoma; L IMM = Lethal infantile mitochondrial myopathy



**Table S21.** Human Omni 2.5-8v1.1

| ID             | Gene            | Variant | Type of Variant | Amino Acid | Base Substitution Associated Phenotypes* | Somatic Variant Associated Phenotypes*                   | PolyPhen-2 Prediction |
|----------------|-----------------|---------|-----------------|------------|------------------------------------------|----------------------------------------------------------|-----------------------|
| 2010-08-MT-841 | Non-Coding      | T72C    |                 |            |                                          | Aging brains; POLG, PEO & control muscle; normal tissues |                       |
| 2010-08-MT-981 | Non-Coding      | A93G    |                 |            |                                          |                                                          |                       |
| 200610-102     | Non-Coding      | T125C   |                 |            |                                          | POLG, PEO & control muscle                               |                       |
| 2010-08-MT-544 | Non-Coding      | T199C   |                 |            |                                          | Ovarian carcinoma                                        |                       |
| 200610-104     | Non-Coding      | T212C   |                 |            |                                          |                                                          |                       |
| 2010-08-MT-550 | Non-Coding      | A215G   |                 |            |                                          | Esophageal cancer                                        |                       |
| 200610-105     | Non-Coding      | T236C   |                 |            |                                          |                                                          |                       |
| 200610-106     | Non-Coding      | T246C   |                 |            |                                          |                                                          |                       |
| 200610-107     | Non-Coding      | T482C   |                 |            |                                          |                                                          |                       |
| 2010-08-MT-723 | Non-Coding      | G513A   |                 |            |                                          |                                                          |                       |
| 2010-08-MT-729 | Non-Coding      | A523C   |                 |            |                                          |                                                          |                       |
| 2010-08-MT-830 | <i>12S rRNA</i> | T711C   |                 |            |                                          |                                                          |                       |
| 200610-42      | <i>12S rRNA</i> | C722T   |                 |            |                                          |                                                          |                       |
| 200610-75      | <i>12S rRNA</i> | G951A   |                 |            |                                          |                                                          |                       |
| 2010-08-MT-27  | <i>12S rRNA</i> | A1041G  |                 |            |                                          |                                                          |                       |
| 200610-108     | <i>12S rRNA</i> | T1107C  |                 |            |                                          |                                                          |                       |
| 200610-109     | <i>12S rRNA</i> | T1119C  |                 |            |                                          |                                                          |                       |
| 2010-08-MT-526 | <i>16S rRNA</i> | C1721T  |                 |            |                                          | Acute leukemia platelets, leukocytes, & bone marrow      |                       |
| 200610-1       | <i>16S rRNA</i> | A2755G  |                 |            | Possibly LVNC-associated                 |                                                          |                       |

| ID             | Gene            | Variant | Type of Variant | Amino Acid | Base Substitution Associated Phenotypes*              | Somatic Variant Associated Phenotypes* | PolyPhen-2 Prediction |
|----------------|-----------------|---------|-----------------|------------|-------------------------------------------------------|----------------------------------------|-----------------------|
| 200610-2       | <i>16S rRNA</i> | A2880G  |                 |            |                                                       |                                        |                       |
| 200610-110     | <i>16S rRNA</i> | T3027C  |                 |            |                                                       |                                        |                       |
| 200610-3       | <i>16S rRNA</i> | A3203G  |                 |            |                                                       |                                        |                       |
| 200610-43      | <i>16S rRNA</i> | C3206T  |                 |            |                                                       |                                        |                       |
| 200610-44      | <i>ND1</i>      | C3330T  | Synonymous      | L8L        |                                                       |                                        |                       |
| 200610-4       | <i>ND1</i>      | A3384G  | Synonymous      | K26K       |                                                       |                                        |                       |
| 200610-111     | <i>ND1</i>      | T3396C  | Synonymous      | Y30Y       | NSHL; MIDD                                            |                                        |                       |
| 200610-112     | <i>ND1</i>      | T3644C  | Nonsynonymous   | V113A      | BD                                                    |                                        | Benign                |
| 200610-113     | <i>ND1</i>      | T3645C  | Synonymous      | V113V      |                                                       |                                        |                       |
| 200610-76      | <i>ND1</i>      | G3705A  | Synonymous      | L133L      |                                                       |                                        |                       |
| 200610-114     | <i>ND1</i>      | T3826C  | Synonymous      | L174L      |                                                       |                                        |                       |
| 200610-45      | <i>ND1</i>      | C3921T  | Synonymous      | S205S      |                                                       |                                        |                       |
| 200610-46      | <i>ND1</i>      | C3970T  | Synonymous      | L222L      |                                                       |                                        |                       |
| 200610-115     | <i>ND1</i>      | T4023C  | Synonymous      | T239T      |                                                       |                                        |                       |
| 200610-47      | <i>ND1</i>      | C4025T  | Nonsynonymous   | T240M      |                                                       |                                        | Benign                |
| 2010-08-MT-655 | <i>ND1</i>      | G4048A  | Nonsynonymous   | D248N      |                                                       |                                        | Benign                |
| 200610-116     | <i>ND1</i>      | T4117C  | Synonymous      | L271L      |                                                       |                                        |                       |
| 2010-08-MT-664 | <i>ND1</i>      | A4164G  | Synonymous      | M286M      |                                                       |                                        |                       |
| 200610-117     | <i>ND1</i>      | T4218C  | Synonymous      | Y304Y      |                                                       |                                        |                       |
| 200610-48      | <i>tRNA-Gln</i> | C4335T  |                 |            |                                                       |                                        |                       |
| 200610-77      | <i>ND2</i>      | G4491A  | Nonsynonymous   | V8I        |                                                       |                                        | Benign                |
| 200610-49      | <i>ND2</i>      | C4508T  | Synonymous      | I13I       |                                                       |                                        |                       |
| 200610-118     | <i>ND2</i>      | T4646C  | Synonymous      | Y59Y       |                                                       | Glioblastoma                           |                       |
| 200610-6       | <i>ND2</i>      | A4833G  | Nonsynonymous   | T122A      | Diabetes helper mutation; AD; PD; Haplogroup G marker |                                        | Possibly damaging     |
| 200610-119     | <i>ND2</i>      | T5048C  | Synonymous      | V193V      |                                                       |                                        |                       |
| 200610-120     | <i>ND2</i>      | T5108C  | Synonymous      | T213T      |                                                       |                                        |                       |
| 200610-7       | <i>ND2</i>      | A5301G  | Nonsynonymous   | I278V      |                                                       |                                        | Benign                |
| 200610-9       | <i>tRNA-tyr</i> | A5833G  |                 |            |                                                       |                                        |                       |

| ID             | Gene            | Variant | Type of Variant | Amino Acid | Base Substitution Associated Phenotypes* | Somatic Variant Associated Phenotypes*    | PolyPhen-2 Prediction |
|----------------|-----------------|---------|-----------------|------------|------------------------------------------|-------------------------------------------|-----------------------|
| 2010-08-MT-773 | CO1             | T5999C  | Synonymous      | A32A       |                                          | Pancreatic cancer cell line; Glioblastoma |                       |
| 200610-79      | CO1             | G6026A  | Synonymous      | L41L       |                                          |                                           |                       |
| 200610-50      | CO1             | C6045T  | Synonymous      | L48L       |                                          |                                           |                       |
| 2010-08-MT-776 | CO1             | A6047G  | Synonymous      | L48L       |                                          | Pancreatic cancer cell line; Glioblastoma |                       |
| 200610-51      | CO1             | C6077T  | Synonymous      | V58V       |                                          |                                           |                       |
| 200610-121     | CO1             | T6248C  | Synonymous      | S115S      |                                          |                                           |                       |
| 200610-80      | CO1             | G6285A  | Nonsynonymous   | V128I      | Prostate Cancer                          |                                           | Benign                |
| 200610-122     | CO1             | T6374C  | Synonymous      | S157S      |                                          |                                           |                       |
| 200610-123     | CO1             | T6392C  | Synonymous      | N163N      |                                          |                                           |                       |
| 200610-81      | CO1             | G6446A  | Synonymous      | T181T      |                                          |                                           |                       |
| 200610-124     | CO1             | T6680C  | Synonymous      | T259T      |                                          |                                           |                       |
| 200610-82      | CO1             | G6734A  | Synonymous      | M277M      |                                          |                                           |                       |
| 200610-10      | CO1             | A6752G  | Synonymous      | L283L      |                                          |                                           |                       |
| 200610-83      | CO1             | G6755A  | Synonymous      | G284G      |                                          |                                           |                       |
| 200610-125     | CO1             | T6776C  | Synonymous      | H291H      |                                          | Breast cystic masses                      |                       |
| 2010-08-MT-831 | CO1             | T7142C  | Synonymous      | H413H      |                                          |                                           |                       |
| 200610-52      | <i>tRNA-Ser</i> | C7476T  |                 |            |                                          | Thyroid hyperplasia                       |                       |
| 200610-12      | <i>tRNA-Asp</i> | G7521A  |                 |            |                                          | Thyroid tumor                             |                       |
| 200610-84      | CO2             | G7598A  | Nonsynonymous   | A5T        | Possible LHON helper                     |                                           | Benign                |
| 2010-08-MT-860 | CO2             | T7684C  | Synonymous      | L33L       |                                          |                                           |                       |
| 2010-08-MT-861 | CO2             | G7697A  | Nonsynonymous   | V38I       | Possible HCM susceptibility              |                                           | Benign                |
| 200610-126     | CO2             | T7759C  | Synonymous      | A58A       |                                          |                                           |                       |
| 2010-08-MT-874 | CO2             | G7853A  | Nonsynonymous   | V90I       |                                          |                                           | Benign                |
| 200610-86      | CO2             | G7859A  | Nonsynonymous   | D92N       | Progressive encephalomyopathy            |                                           | Benign                |
| 200610-127     | CO2             | T7861C  | Synonymous      | D92D       |                                          |                                           |                       |

| ID             | Gene        | Variant | Type of Variant | Amino Acid | Base Substitution Associated Phenotypes* | Somatic Variant Associated Phenotypes* | PolyPhen-2 Prediction |
|----------------|-------------|---------|-----------------|------------|------------------------------------------|----------------------------------------|-----------------------|
| 200610-128     | <i>CO2</i>  | T7870C  | Synonymous      | L95L       |                                          |                                        |                       |
| 200610-13      | <i>CO2</i>  | A7972G  | Synonymous      | E129E      |                                          |                                        |                       |
| 200610-87      | <i>CO2</i>  | G8020A  | Synonymous      | P145P      |                                          |                                        |                       |
| 200610-129     | <i>ATP8</i> | T8404C  | Synonymous      | I13I       |                                          |                                        |                       |
| 200610-53      | <i>ATP8</i> | C8472T  | Nonsynonymous   | P36L       |                                          |                                        | Benign                |
| 200610-14      | <i>ATP8</i> | A8502G  | Nonsynonymous   | N46S       |                                          |                                        | Possibly damaging     |
| 200610-130     | <i>ATP6</i> | T8594C  | Nonsynonymous   | I23T       |                                          |                                        | Possibly damaging     |
| 200610-131     | <i>ATP6</i> | T8793C  | Synonymous      | P89P       |                                          |                                        |                       |
| 200610-55      | <i>ATP6</i> | C8859T  | Synonymous      | G111G      |                                          |                                        |                       |
| 200610-18      | <i>ATP6</i> | A8946G  | Synonymous      | M140M      |                                          |                                        |                       |
| 200610-56      | <i>ATP6</i> | C8964T  | Synonymous      | T146T      |                                          |                                        |                       |
| 200610-89      | <i>ATP6</i> | G9064A  | Nonsynonymous   | A180T      |                                          |                                        | Benign                |
| 200610-57      | <i>ATP6</i> | C9140T  | Nonsynonymous   | A205V      |                                          |                                        | Probably damaging     |
| 2010-08-MT-969 | <i>ATP6</i> | A9150G  | Synonymous      | L208L      |                                          |                                        |                       |
| 200610-58      | <i>CO3</i>  | C9458T  | Synonymous      | I84I       |                                          |                                        |                       |
| 200610-21      | <i>CO3</i>  | A9587G  | Synonymous      | L127L      |                                          |                                        |                       |
| 200610-59      | <i>CO3</i>  | C9785T  | Synonymous      | Y193Y      |                                          |                                        |                       |
| 200610-133     | <i>ND3</i>  | T10118C | Synonymous      | I20I       |                                          |                                        |                       |
| 200610-22      | <i>ND3</i>  | A10397G | Synonymous      | W113W      |                                          |                                        |                       |
| 200610-60      | <i>ND4L</i> | C10607T | Synonymous      | L46L       |                                          |                                        |                       |
| 200610-135     | <i>ND4L</i> | T10640C | Synonymous      | N57N       |                                          | Endometrial tumor                      |                       |
| 200610-23      | <i>ND4L</i> | A10754G | Synonymous      | L95L       |                                          |                                        |                       |
| 200610-92      | <i>ND4</i>  | G11016A | Nonsynonymous   | S86N       |                                          | Thyroid tumor                          | Benign                |
| 200610-61      | <i>ND4</i>  | C11061T | Nonsynonymous   | S101F      |                                          |                                        | Benign                |
| 200610-62      | <i>ND4</i>  | C11215T | Synonymous      | Y152Y      |                                          |                                        |                       |
| 200610-63      | <i>ND4</i>  | C11288T | Synonymous      | L177L      |                                          |                                        |                       |
| 200610-65      | <i>ND4</i>  | C11536T | Synonymous      | Y259Y      |                                          |                                        |                       |
| 2010-08-MT-82  | <i>ND4</i>  | A11560G | Synonymous      | W267W      |                                          |                                        |                       |

| ID             | Gene             | Variant | Type of Variant | Amino Acid | Base Substitution Associated Phenotypes*       | Somatic Variant Associated Phenotypes* | PolyPhen-2 Prediction |
|----------------|------------------|---------|-----------------|------------|------------------------------------------------|----------------------------------------|-----------------------|
| 200610-93      | <i>ND4</i>       | G11696A | Nonsynonymous   | V313I      | LHON; LDYT; DEAF; Hypertension helper mutation |                                        | Benign                |
| 200610-25      | <i>ND4</i>       | A11959G | Synonymous      | M400M      |                                                |                                        |                       |
| 200610-136     | <i>ND4</i>       | T12121C | Synonymous      | I454I      |                                                |                                        |                       |
| 200610-137     | <i>tRNA-Leu2</i> | T12285C |                 |            |                                                |                                        |                       |
| 200610-67      | <i>ND5</i>       | C12498T | Synonymous      | F54F       |                                                |                                        |                       |
| 2010-08-MT-143 | <i>ND5</i>       | A12642G | Synonymous      | E102E      |                                                |                                        |                       |
| 200610-94      | <i>ND5</i>       | G12771A | Synonymous      | E145E      |                                                |                                        |                       |
| 2010-08-MT-158 | <i>ND5</i>       | T12811C | Nonsynonymous   | Y159H      | Possible LHON factor                           |                                        | Benign                |
| 200610-27      | <i>ND5</i>       | A12822G | Synonymous      | A162A      |                                                |                                        |                       |
| 200610-68      | <i>ND5</i>       | C12882T | Synonymous      | F182F      |                                                |                                        |                       |
| 200610-95      | <i>ND5</i>       | G12940A | Nonsynonymous   | A202T      |                                                |                                        | Benign                |
| 200610-30      | <i>ND5</i>       | A13183G | Nonsynonymous   | I283V      |                                                |                                        | Benign                |
| 200610-138     | <i>ND5</i>       | T13215C | Synonymous      | L293L      |                                                |                                        |                       |
| 200610-69      | <i>ND5</i>       | C13626T | Synonymous      | T430T      |                                                |                                        |                       |
| 200610-70      | <i>ND5</i>       | C13934T | Nonsynonymous   | T533M      |                                                |                                        | Benign                |
| 2010-08-MT-226 | <i>ND5</i>       | A14133G | Synonymous      | L599L      |                                                |                                        |                       |
| 2010-08-MT-232 | <i>ND6</i>       | T14182C | Synonymous      | V164V      |                                                |                                        |                       |
| 200610-96      | <i>ND6</i>       | G14323A | Synonymous      | N117N      |                                                |                                        |                       |
| 200610-71      | <i>ND6</i>       | C14338T | Synonymous      | V112V      |                                                |                                        |                       |
| 2010-08-MT-251 | <i>ND6</i>       | A14417G | Nonsynonymous   | V86A       |                                                | Papillary thyroid carcinoma            | Benign                |
| 200610-72      | <i>ND6</i>       | C14433T | Nonsynonymous   | A81T       |                                                |                                        | Benign                |
| 200610-140     | <i>ND6</i>       | T14502C | Nonsynonymous   | I58V       | LHON                                           |                                        | Benign                |
| 200610-141     | <i>ND6</i>       | T14512C | Synonymous      | M54M       |                                                |                                        |                       |
| 200610-97      | <i>ND6</i>       | G14544A | Synonymous      | L44L       |                                                |                                        |                       |
| 200610-98      | <i>ND6</i>       | G14569A | Synonymous      | S35S       |                                                |                                        |                       |

| ID             | Gene       | Variant | Type of Variant | Amino Acid | Base Substitution Associated Phenotypes* | Somatic Variant Associated Phenotypes* | PolyPhen-2 Prediction |
|----------------|------------|---------|-----------------|------------|------------------------------------------|----------------------------------------|-----------------------|
| 2010-08-MT-288 | CYB        | C14872T | Synonymous      | I42I       |                                          |                                        |                       |
| 200610-33      | CYB        | A14890G | Synonymous      | G48G       |                                          |                                        |                       |
| 200610-34      | CYB        | A14893G | Synonymous      | L49L       |                                          |                                        |                       |
| 200610-142     | CYB        | T14979C | Nonsynonymous   | I78T       |                                          |                                        | Benign                |
| 200610-99      | CYB        | G15148A | Synonymous      | P134P      |                                          |                                        |                       |
| 200610-100     | CYB        | G15172A | Synonymous      | G142G      |                                          | Endometrial tumor                      |                       |
| 200610-74      | CYB        | C15452T | Nonsynonymous   | L236F      |                                          |                                        | Benign                |
| 200610-35      | CYB        | A15487T | Synonymous      | P247P      |                                          |                                        |                       |
| 200610-143     | CYB        | T15514C | Synonymous      | Y256Y      |                                          |                                        |                       |
| 2010-08-MT-395 | Non-Coding | C16069T |                 |            |                                          |                                        |                       |
| 2010-08-MT-398 | Non-Coding | T16086C |                 |            |                                          |                                        |                       |
| 2010-08-MT-418 | Non-Coding | C16168T |                 |            |                                          |                                        |                       |
| 200610-146     | Non-Coding | T16217C |                 |            |                                          | Prostate tumor                         |                       |
| 2010-08-MT-463 | Non-Coding | C16261T |                 |            |                                          |                                        |                       |
| 2010-08-MT-480 | Non-Coding | C16294T |                 |            |                                          |                                        |                       |
| 2010-08-MT-483 | Non-Coding | T16298C |                 |            |                                          | Prostate tumor                         |                       |
| 2010-08-MT-489 | Non-Coding | A16316G |                 |            |                                          |                                        |                       |
| 2010-08-MT-502 | Non-Coding | T16356C |                 |            |                                          | Glioblastoma                           |                       |
| 2010-08-MT-504 | Non-Coding | T16362C |                 |            |                                          |                                        |                       |
| 2010-08-MT-511 | Non-Coding | A16399G |                 |            |                                          | Gastric carcinoma                      |                       |
| 200610-37      | Non-Coding | A16482G |                 |            |                                          |                                        |                       |

\*MITOMAP

ND = NADH dehydrogenase; CYB = Cytochrome b; CO = Cytochrome c oxidase; ATP = ATP synthase; POLG = Mitochondrial DNA polymerase  $\gamma$ ; PEO = Progressive external ophthalmoplegia; LVNC = Left ventricular non-compaction cardiomyopathy; NSHL = Non-syndromic hearing loss; MIDD = Maternally inherited diabetes and deafness; BD = Bipolar disorder; AD = Alzheimer's disease; PD = Parkinson's disease; LHON = Leber Hereditary optic neuropathy; HCM = Hypertrophic cardiomyopathy; LDYT = Leber hereditary optic neuropathy and dystonia; DEAF = Deafness

**Table S22.** Illumina Human 660W- Quad v1

| ID         | Gene            | Variant | Type of Variant | Amino Acid | Base Substitution Associated Variants* | Somatic Variant Associated Phenotypes* | PolyPhen-2 Prediction |
|------------|-----------------|---------|-----------------|------------|----------------------------------------|----------------------------------------|-----------------------|
| MitoT217C  | Non-Coding      | T217C   |                 |            |                                        |                                        |                       |
| MitoG228A  | Non-Coding      | G228A   |                 |            |                                        |                                        |                       |
| MitoG247A  | Non-Coding      | G247A   |                 |            |                                        |                                        |                       |
| MitoC295T  | Non-Coding      | C295T   |                 |            |                                        | POLG & MNGIE muscle;                   |                       |
| MitoC458T  | Non-Coding      | C456T   |                 |            |                                        | Glioblastoma                           |                       |
| MitoC464T  | Non-Coding      | C462T   |                 |            |                                        | Thyroid tumor                          |                       |
| MitoT479C  | Non-Coding      | T477C   |                 |            |                                        | Thyroid tumor                          |                       |
| MitoT491C  | Non-Coding      | T489C   |                 |            |                                        | AD brains; Ovarian & prostate tumors   |                       |
| MitoG752A  | <i>12S rRNA</i> | A750G   |                 |            |                                        | Ovarian carcinoma                      |                       |
| MitoA829G  | <i>12S rRNA</i> | A827G   |                 |            |                                        |                                        |                       |
| MitoC1050T | <i>12S rRNA</i> | C1048T  |                 |            |                                        |                                        |                       |
| MitoT1191C | <i>12S rRNA</i> | T1189C  |                 |            |                                        |                                        |                       |
| MitoG1440A | <i>12S rRNA</i> | A1438G  |                 |            |                                        |                                        |                       |
| MitoG1721A | <i>16S rRNA</i> | G1719A  |                 |            |                                        |                                        |                       |
| MitoA1738G | <i>16S rRNA</i> | A1736G  |                 |            |                                        |                                        |                       |
| MitoT2160C | <i>16S rRNA</i> | T2158C  |                 |            |                                        |                                        |                       |
| MitoC2485T | <i>16S rRNA</i> | T2483C  |                 |            |                                        |                                        |                       |
| MitoG2708A | <i>16S rRNA</i> | A2706G  |                 |            |                                        |                                        |                       |

| ID         | Gene            | Variant | Type of Variant | Amino Acid | Base Substitution Associated Variants* | Somatic Variant Associated Phenotypes*              | PolyPhen-2 Prediction |
|------------|-----------------|---------|-----------------|------------|----------------------------------------|-----------------------------------------------------|-----------------------|
| MitoC2791T | <i>16S rRNA</i> | C2789T  |                 |            |                                        |                                                     |                       |
| MitoT2887C | <i>16S rRNA</i> | T2885C  |                 |            |                                        |                                                     |                       |
| MitoG3012A | <i>16S rRNA</i> | G3010A  |                 |            |                                        | Cyclic Vomiting Syndrome with Migraine; Reported PM |                       |
| MitoT3198C | <i>16S rRNA</i> | T3197C  |                 |            |                                        |                                                     |                       |
| MitoA3349G | <i>ND1</i>      | A3348G  | Synonymous      |            |                                        |                                                     |                       |
| MitoT3395C | <i>ND1</i>      | T3394C  | Nonsynonymous   | Y30H       |                                        |                                                     | Benign                |
| MitoA3481G | <i>ND1</i>      | A3480G  | Synonymous      |            |                                        | Prostate tumor                                      |                       |
| MitoC3595T | <i>ND1</i>      | C3594T  | Synonymous      |            |                                        | Thyroid tumor                                       |                       |
| MitoG3667A | <i>ND1</i>      | G3666A  | Synonymous      |            |                                        |                                                     |                       |
| MitoA3721G | <i>ND1</i>      | A3720G  | Synonymous      |            |                                        |                                                     |                       |
| MitoG3916A | <i>ND1</i>      | G3915A  | Synonymous      |            |                                        |                                                     |                       |
| MitoG3919A | <i>ND1</i>      | G3918A  | Synonymous      |            |                                        | Breast tumor                                        |                       |
| MitoC3971T | <i>ND1</i>      | C3970T  | Synonymous      |            |                                        |                                                     |                       |
| MitoC3993T | <i>ND1</i>      | C3992T  | Nonsynonymous   | T229M      |                                        | Thyroid tumor                                       | Benign                |
| MitoA4025G | <i>ND1</i>      | A4024G  | Nonsynonymous   | T240A      |                                        |                                                     | Benign                |
| MitoT4337C | <i>tRNA-Gln</i> | T4336C  |                 |            |                                        | AD; PD; Hearing loss & migraine                     |                       |
| MitoT4562C | <i>ND2</i>      | T4561C  | Nonsynonymous   | V31A       |                                        |                                                     | Benign                |
| MitoG4770A | <i>ND2</i>      | A4769G  | Synonymous      |            |                                        | SZ-associated                                       |                       |
| MitoG4821A | <i>ND2</i>      | G4820A  | Synonymous      |            |                                        |                                                     |                       |
| MitoA4825G | <i>ND2</i>      | A4824G  | Nonsynonymous   | T119A      |                                        |                                                     | Possibly damaging     |
| MitoC4884T | <i>ND2</i>      | C4883T  | Synonymous      |            |                                        | Glaucoma<br>LHON; Insulin resistance; AMD;          |                       |
| MitoA4918G | <i>ND2</i>      | A4917G  | Nonsynonymous   | N150D      |                                        | NRTI-PN; Haplogroup T marker                        | Benign                |
| MitoT4978C | <i>ND2</i>      | T4977C  | Synonymous      |            |                                        |                                                     |                       |
| MitoT5005C | <i>ND2</i>      | T5004C  | Synonymous      |            |                                        |                                                     |                       |
| MitoG5047A | <i>ND2</i>      | G5046A  | Nonsynonymous   | V193I      |                                        |                                                     | Benign                |



| ID         | Gene            | Variant | Type of Variant       | Amino Acid      | Base Substitution Associated Variants *   | Somatic Variant Associated Phenotypes * | PolyPhen-2 Prediction |
|------------|-----------------|---------|-----------------------|-----------------|-------------------------------------------|-----------------------------------------|-----------------------|
| MitoC5264T | <i>ND2</i>      | C5263T  | Nonsynonymous         | A265V           |                                           |                                         | Benign                |
| MitoA5391G | <i>ND2</i>      | A5390G  | Synonymous            |                 |                                           |                                         |                       |
| MitoT5443C | <i>ND2</i>      | T5442C  | Nonsynonymous         | F325L           |                                           |                                         | Benign                |
| MitoG5461A | <i>ND2</i>      | G5460A  | Nonsynonymous         | A331T           | AD; PD                                    |                                         | Benign                |
| MitoT5496C | <i>ND2</i>      | T5495C  | Synonymous            |                 |                                           |                                         |                       |
| MitoA5657G | Non-Coding      | A5656G  |                       |                 |                                           |                                         |                       |
| MitoG5774A | <i>tRNA-Cys</i> | G5773A  |                       |                 |                                           |                                         |                       |
| MitoA5952G | <i>CO1</i>      | A5951G  | Synonymous            |                 |                                           |                                         |                       |
| MitoG6027A | <i>CO1</i>      | G6026A  | Synonymous            |                 |                                           |                                         |                       |
| MitoC6046T | <i>CO1</i>      | C6045T  | Synonymous            |                 |                                           |                                         |                       |
| MitoT6153C | <i>CO1</i>      | T6152C  | Synonymous            |                 |                                           |                                         |                       |
| MitoT6222C | <i>CO1</i>      | T6221C  | Synonymous            |                 |                                           |                                         |                       |
| MitoG6261A | <i>CO1</i>      | G6260A  | Synonymous            |                 |                                           |                                         |                       |
| MitoT6681C | <i>CO1</i>      | T6680C  | Synonymous            |                 |                                           |                                         |                       |
| MitoA6753G | <i>CO1</i>      | A6752G  | Synonymous            |                 |                                           |                                         |                       |
| MitoT6777C | <i>CO1</i>      | T6776C  | Synonymous            |                 | Breast cystic masses<br>MNGIE fibroblasts |                                         |                       |
| MitoA7056G | <i>CO1</i>      | A7055G  | Synonymous            |                 |                                           |                                         |                       |
| MitoT7176C | <i>CO1</i>      | T7175C  | Synonymous            |                 |                                           |                                         |                       |
| MitoC7275T | <i>CO1</i>      | C7274T  | Synonymous            |                 |                                           |                                         |                       |
| MitoG7522A | <i>tRNA-Asp</i> | G7521A  |                       |                 | Thyroid tumor                             |                                         |                       |
| MitoA7769G | <i>CO2</i>      | A7768G  | Synonymous            |                 |                                           |                                         |                       |
| MitoG8270A | <i>CO2</i>      | G8269A  | Premature termination | Term228T<br>erm |                                           |                                         |                       |
| MitoT8278C | Non-Coding      | T8277C  |                       |                 |                                           |                                         |                       |
| MitoG8617T | <i>ATP6</i>     | G8616T  | Nonsynonymous         | L30F            |                                           |                                         | Probably damaging     |
| MitoC8656T | <i>ATP6</i>     | C8655T  | Synonymous            |                 |                                           |                                         |                       |
| MitoA8870G | <i>ATP6</i>     | A8869G  | Nonsynonymous         | M115V           |                                           |                                         | Benign                |
| MitoA9073G | <i>ATP6</i>     | A9072G  | Synonymous            |                 |                                           |                                         |                       |
| MitoA9094G | <i>ATP6</i>     | A9093G  | Synonymous            |                 |                                           |                                         |                       |
| MitoG9378A | <i>CO3</i>      | A9377G  | Synonymous            |                 |                                           |                                         |                       |
| MitoC9541T | <i>CO3</i>      | T9540C  | Synonymous            |                 | Tumor                                     |                                         |                       |
| MitoA9668G | <i>CO3</i>      | A9667G  | Nonsynonymous         | N154S           |                                           |                                         | Benign                |

| ID          | Gene             | Variant | Type of Variant | Amino Acid | Base Substitution Associated Variants*                                                                                                             | Somatic Variant Associated Phenotypes*                   | PolyPhen-2 Prediction |
|-------------|------------------|---------|-----------------|------------|----------------------------------------------------------------------------------------------------------------------------------------------------|----------------------------------------------------------|-----------------------|
| MitoT9699C  | <i>CO3</i>       | T9698C  | Synonymous      |            |                                                                                                                                                    |                                                          |                       |
| MitoT9717C  | <i>CO3</i>       | T9716C  | Synonymous      |            |                                                                                                                                                    |                                                          |                       |
| MitoT9900C  | <i>CO3</i>       | T9899C  | Synonymous      |            |                                                                                                                                                    |                                                          |                       |
| MitoT9951C  | <i>CO3</i>       | T9950C  | Synonymous      |            |                                                                                                                                                    |                                                          |                       |
| MitoT10035C | <i>tRNA-Gly</i>  | T10034C |                 |            |                                                                                                                                                    |                                                          |                       |
| MitoA10045G | <i>tRNA-Gly</i>  | A10044G |                 |            | SIDS                                                                                                                                               |                                                          |                       |
| MitoT10239C | <i>ND3</i>       | T10238C | Synonymous      |            |                                                                                                                                                    |                                                          |                       |
| MitoG10311A | <i>ND3</i>       | G10310A | Synonymous      |            |                                                                                                                                                    |                                                          |                       |
| MitoT10322C | <i>ND3</i>       | T10321C | Nonsynonymous   | V88A       | Bladder tumor<br>PD protective factor;<br>Longevity; Altered cell<br>pH; Metabolic<br>syndrome; Breast<br>cancer risk;<br>Haplogroup IJK<br>marker | Benign                                                   |                       |
| MitoG10399A | <i>ND3</i>       | A10398G | Nonsynonymous   | T114A      | Endometrium tumor<br>Endometrium control<br>tissue                                                                                                 | Benign                                                   |                       |
| MitoT10464C | <i>tRNA-Arg</i>  | T10463C |                 |            |                                                                                                                                                    |                                                          |                       |
| MitoA10551G | <i>ND4L</i>      | A10550G | Synonymous      |            |                                                                                                                                                    |                                                          |                       |
| MitoG10587A | <i>ND4L</i>      | G10586A | Synonymous      |            |                                                                                                                                                    |                                                          |                       |
| MitoG10689A | <i>ND4L</i>      | G10688A | Synonymous      |            |                                                                                                                                                    |                                                          |                       |
| MitoT10916C | <i>ND4</i>       | T10915C | Synonymous      |            |                                                                                                                                                    |                                                          |                       |
| MitoA11252G | <i>ND4</i>       | A11251G | Synonymous      |            |                                                                                                                                                    |                                                          |                       |
| MitoG11378A | <i>ND4</i>       | G11377A | Synonymous      |            |                                                                                                                                                    |                                                          |                       |
| MitoA11468G | <i>ND4</i>       | A11467G | Synonymous      |            | Altered brain pH; sCJD<br>patients                                                                                                                 |                                                          |                       |
| MitoT11486C | <i>ND4</i>       | T11485C | Synonymous      |            |                                                                                                                                                    |                                                          |                       |
| MitoT11900C | <i>ND4</i>       | T11899C | Synonymous      |            |                                                                                                                                                    |                                                          |                       |
| MitoG11915A | <i>ND4</i>       | G11914A | Synonymous      |            |                                                                                                                                                    |                                                          |                       |
| MitoA12309G | <i>tRNA-Leu2</i> | A12308G |                 |            | CPEO; Stroke; CM;<br>Breast, renal, prostate<br>cancer risk; Altered                                                                               | Endometrium control<br>tissue; Lung & prostate<br>tumors |                       |

| ID          | Gene     | Variant | Type of Variant | Amino Acid | Base Substitution Associated Variants *                                | Somatic Variant Associated Phenotypes *   | PolyPhen-2 Prediction       |
|-------------|----------|---------|-----------------|------------|------------------------------------------------------------------------|-------------------------------------------|-----------------------------|
| MitoG12373A | ND5      | G12372A | Synonymous      |            | brain pH; sCJD; Haplogroup U marker<br>Altered brain pH; sCJD patients | Prostate tumor                            |                             |
| MitoG12631A | ND5      | G12630A | Synonymous      |            |                                                                        |                                           |                             |
| MitoC12670T | ND5      | C12669T | Synonymous      |            |                                                                        | Prostate tumor                            |                             |
| MitoT12706C | ND5      | C12705T | Synonymous      |            |                                                                        |                                           |                             |
| MitoG12851A | ND5      | A12850G | Nonsynonymous   | I172V      |                                                                        |                                           | Possibly damaging<br>Benign |
| MitoA13106G | ND5      | A13105G | Nonsynonymous   | I257V      |                                                                        |                                           |                             |
| MitoA13264G | ND5      | A13263G | Synonymous      |            |                                                                        |                                           |                             |
| MitoC13651T | ND5      | C13650T | Synonymous      |            |                                                                        |                                           |                             |
| MitoA13781G | ND5      | A13780G | Nonsynonymous   | I482V      |                                                                        |                                           | Benign<br>Probably damaging |
| MitoT13790C | ND5      | T13789C | Nonsynonymous   | Y485H      |                                                                        |                                           |                             |
| MitoT13966C | ND5      | T13965C | Synonymous      |            |                                                                        |                                           |                             |
| MitoT14179C | ND6      | T14178C | Nonsynonymous   | I166V      |                                                                        |                                           | Benign                      |
| MitoA14234G | ND6      | A14233G | Synonymous      |            |                                                                        |                                           |                             |
| MitoA14583G | ND6      | A14582G | Nonsynonymous   | V31A       |                                                                        | Glioblastoma                              | Benign<br>Benign            |
| MitoT14799C | CYB      | T14798C | Nonsynonymous   | F18L       |                                                                        |                                           |                             |
| MitoG15044A | CYB      | G15043A | Synonymous      |            | MDD-associated                                                         |                                           |                             |
| MitoA15245G | CYB      | A15244G | Synonymous      |            |                                                                        |                                           |                             |
| MitoG15258A | CYB      | G15257A | Nonsynonymous   | D171N      | LHON; Haplogroup J2 marker; Possible helper mutation                   |                                           | Benign                      |
| MitoA15302G | CYB      | G15301A | Synonymous      |            |                                                                        |                                           |                             |
| MitoC15536T | CYB      | C15535T | Synonymous      |            |                                                                        | Breast tumor                              |                             |
| MitoT15671C | CYB      | T15670C | Synonymous      |            |                                                                        |                                           |                             |
| MitoA15759G | CYB      | A15758G | Nonsynonymous   | I338V      |                                                                        |                                           | Benign                      |
| MitoT15785C | CYB      | T15784C | Synonymous      |            |                                                                        |                                           |                             |
| MitoC15834T | CYB      | C15833T | Synonymous      |            | POAG-potential for association                                         | Pancreatic cancer cell line; Breast tumor |                             |
| MitoC15905T | tRNA-Thr | C15904T |                 |            |                                                                        |                                           |                             |
| MitoA15925G | tRNA-Thr | A15924G |                 |            | LIMM                                                                   |                                           |                             |

| ID          | Gene       | Variant | Type of Variant | Amino Acid | Base Substitution Associated Variants*                                     | Somatic Variant Associated Phenotypes*   | PolyPhen-2 Prediction |
|-------------|------------|---------|-----------------|------------|----------------------------------------------------------------------------|------------------------------------------|-----------------------|
| MitoG15929A | tRNA-Thr   | G15928A |                 |            | MS; Idiopathic repeat miscarriage; AD protection; Possible helper mutation |                                          |                       |
| MitoG15931A | tRNA-Thr   | G15930A |                 |            |                                                                            |                                          |                       |
| MitoG16130A | Non-Coding | G16129A |                 |            | Cyclic vomiting syndrome with migraine                                     |                                          |                       |
| MitoT16145C | Non-Coding | T16144C |                 |            |                                                                            |                                          |                       |
| MitoG16146A | Non-Coding | G16145A |                 |            |                                                                            |                                          |                       |
| MitoC16149T | Non-Coding | C16148T |                 |            |                                                                            | Aging brains                             |                       |
| MitoA16163G | Non-Coding | A16162G |                 |            |                                                                            |                                          |                       |
| MitoA16164G | Non-Coding | A16163G |                 |            |                                                                            |                                          |                       |
| MitoC16184A | Non-Coding | A16183C |                 |            | Melanoma patients                                                          | Lung tumor back-mutation; Prostate tumor |                       |
| MitoC16272T | Non-Coding | C16270T |                 |            | Melanoma patients                                                          |                                          |                       |
| MitoC16329T | Non-Coding | C16327T |                 |            |                                                                            |                                          |                       |
| MitoG16392A | Non-Coding | G16390A |                 |            | POAG-potential for association                                             | Breast & ovarian tumors                  |                       |
| MitoG16393A | Non-Coding | G16391A |                 |            |                                                                            |                                          |                       |

\*MITOMAP

ND = NADH dehydrogenase; CYB = Cytochrome b; CO = Cytochrome c oxidase; ATP = ATP synthase; POLG = Mitochondrial DNA polymerase  $\gamma$ ; MNGIE = Mitochondrial neurogastrointestinal encephalopathy; AD = Alzheimer's disease; PD = Parkinson's disease; LHON = Leber Hereditary optic neuropathy; AMD = Age-related macular degeneration; NRTI = Nucleoside reverse transcriptase inhibitor; SZ = Schizophrenia; SIDS = Sudden infant death syndrome; sCJD = Sporadic Creutzfeldt-Jakob disease; Chronic progressive external ophthalmoplegia; CM = Cardiomyopathy; MDD = Major depressive disorder; POAG = Primary open angle glaucoma; L IMM = Lethal infantile mitochondrial myopathy; MS = Multiple sclerosis

**Table S23.** Affymetrix 6.0

| ID         | Gene            | Variant | Type of Variant | Amino Acid | Base Substitution Associated Phenotypes* | Somatic Variant Associated Phenotypes*                                                        | PolyPhen-2 Prediction |
|------------|-----------------|---------|-----------------|------------|------------------------------------------|-----------------------------------------------------------------------------------------------|-----------------------|
| rs2857291  | Non-coding      | T195C   |                 |            | BD; Melanoma patients                    | Elderly fibroblasts; Elderly/AD brains; Lung, thyroid, ovarian, prostate tumors; Glioblastoma |                       |
| rs3937037  | Non-coding      | A235G   |                 |            |                                          | Prostate tumor                                                                                |                       |
| rs2853515  | Non-coding      | A263G   |                 |            |                                          | POLG/MNGIE muscle                                                                             |                       |
| rs3883865  | Non-coding      | T346C   |                 |            |                                          |                                                                                               |                       |
| rs28412942 | Non-coding      | T408A   |                 |            |                                          | Elderly muscle; POLG; PEO; TWINKLE/PEO frontal cortex and muscle; normal tissue               |                       |
| rs28625645 | Non-coding      | T489C   |                 |            |                                          | Ovarian carcinoma; Prostate tumor                                                             |                       |
| rs28660704 | Non-coding      | C497T   |                 |            |                                          | Thyroid tumor                                                                                 |                       |
| rs28661787 | Non-coding      | A515G   |                 |            |                                          |                                                                                               |                       |
| rs2853518  | <i>12S rRNA</i> | A750G   |                 |            |                                          |                                                                                               |                       |
| rs28358570 | <i>12S rRNA</i> | T921C   |                 |            | Possibly LVNC-associated                 |                                                                                               |                       |
| rs28377377 | <i>12S rRNA</i> | G927A   |                 |            |                                          |                                                                                               |                       |
| rs28579222 | <i>12S rRNA</i> | A942G   |                 |            |                                          |                                                                                               |                       |
| rs3888511  | <i>12S rRNA</i> | T961G   |                 |            | Possibly DEAF-associated                 |                                                                                               |                       |
| rs28496470 | <i>12S rRNA</i> | G1273T  |                 |            |                                          |                                                                                               |                       |
| rs28673100 | <i>12S rRNA</i> | A1374T  |                 |            |                                          |                                                                                               |                       |
| rs28612532 | <i>12S rRNA</i> | C1378T  |                 |            |                                          |                                                                                               |                       |
| rs28729254 | <i>12S rRNA</i> | A1379C  |                 |            |                                          |                                                                                               |                       |
| rs28573951 | <i>12S rRNA</i> | G1380A  |                 |            |                                          |                                                                                               |                       |
| rs28493131 | <i>12S rRNA</i> | G1389T  |                 |            |                                          |                                                                                               |                       |
| rs28392533 | <i>12S rRNA</i> | G1410A  |                 |            |                                          |                                                                                               |                       |
| rs28376246 | <i>16S rRNA</i> | C1699T  |                 |            |                                          |                                                                                               |                       |

| ID         | Gene            | Variant | Type of Variant | Amino Acid | Base Substitution Associated Phenotypes*                | Somatic Variant Associated Phenotypes* | PolyPhen-2 Prediction |
|------------|-----------------|---------|-----------------|------------|---------------------------------------------------------|----------------------------------------|-----------------------|
| rs2854126  | <i>16S rRNA</i> | T1700C  |                 |            |                                                         |                                        |                       |
| rs28527344 | <i>16S rRNA</i> | C1703T  |                 |            |                                                         |                                        |                       |
| rs28491689 | <i>16S rRNA</i> | G1750A  |                 |            |                                                         |                                        |                       |
| rs28687354 | <i>16S rRNA</i> | C1833A  |                 |            |                                                         |                                        |                       |
| rs28736648 | <i>16S rRNA</i> | T2277C  |                 |            |                                                         |                                        |                       |
| rs28358578 | <i>16S rRNA</i> | C2332T  |                 |            |                                                         |                                        |                       |
| rs28358579 | <i>16S rRNA</i> | T2352C  |                 |            | Possibly LVNC                                           |                                        |                       |
| rs28558945 | <i>16S rRNA</i> | C2415T  |                 |            |                                                         |                                        |                       |
| rs28489580 | <i>16S rRNA</i> | C2516A  |                 |            |                                                         |                                        |                       |
| rs28445018 | <i>16S rRNA</i> | T2630C  |                 |            |                                                         |                                        |                       |
| rs2854128  | <i>16S rRNA</i> | A2706G  |                 |            |                                                         |                                        |                       |
| rs28406270 | <i>16S rRNA</i> | A2753C  |                 |            |                                                         |                                        |                       |
| rs28619217 | <i>16S rRNA</i> | A2755G  |                 |            | Possibly LVNC                                           |                                        |                       |
| rs2856980  | <i>16S rRNA</i> | G2758A  |                 |            |                                                         |                                        |                       |
| rs28358581 | <i>16S rRNA</i> | C2789T  |                 |            |                                                         |                                        |                       |
| rs3928312  | <i>16S rRNA</i> | A2833G  |                 |            |                                                         |                                        |                       |
| rs2854129  | <i>16S rRNA</i> | T2857C  |                 |            |                                                         |                                        |                       |
| rs28393169 | <i>16S rRNA</i> | T2863C  |                 |            |                                                         |                                        |                       |
| rs28627238 | <i>16S rRNA</i> | A2866C  |                 |            |                                                         |                                        |                       |
| rs2854130  | <i>16S rRNA</i> | T2885C  |                 |            |                                                         |                                        |                       |
| rs28597879 | <i>16S rRNA</i> | G3001A  |                 |            |                                                         |                                        |                       |
| rs28611051 | <i>16S rRNA</i> | A3125G  |                 |            |                                                         |                                        |                       |
| rs28408321 | <i>16S rRNA</i> | C3126G  |                 |            |                                                         |                                        |                       |
| rs28656364 | <i>16S rRNA</i> | C3149T  |                 |            |                                                         |                                        |                       |
| rs28434229 | <i>16S rRNA</i> | G3196A  |                 |            | AD; PD                                                  |                                        |                       |
| rs2854131  | <i>16S rRNA</i> | T3197C  |                 |            |                                                         |                                        |                       |
| rs28553329 | <i>16S rRNA</i> | C3210T  |                 |            |                                                         |                                        |                       |
| rs28358582 | <i>ND1</i>      | T3308C  | Nonsynonymous   | M1T        | MELAS; DEAF enhancer; Hypertension; LVNC; Putative LHON | Colorectal tumor                       | Probably damaging     |
| rs28416101 | <i>ND1</i>      | T3336C  | Synonymous      | I10I       |                                                         |                                        |                       |

| ID         | Gene        | Variant | Type of Variant       | Amino Acid | Base Substitution Associated Phenotypes* | Somatic Variant Associated Phenotypes*      | PolyPhen-2 Prediction |
|------------|-------------|---------|-----------------------|------------|------------------------------------------|---------------------------------------------|-----------------------|
| rs28512326 | <i>ND1</i>  | G3436A  | Premature termination | TermG44T   |                                          | Head & neck tumors                          |                       |
| rs28358583 | <i>ND1</i>  | C3450T  | Synonymous            | P48P       |                                          |                                             |                       |
| rs28358585 | <i>ND1</i>  | A3505G  | Nonsynonymous         | T67A       |                                          | Pancreatic cancer cell line; Prostate tumor | Benign                |
| rs28369556 | <i>ND1</i>  | C3513T  | Synonymous            | T69T       |                                          |                                             |                       |
| rs2854133  | <i>ND1</i>  | A3565G  | Nonsynonymous         | T87A       |                                          |                                             | Benign                |
| rs28647976 | <i>ND1</i>  | C3604G  | Nonsynonymous         | L100V      |                                          |                                             | Possibly damaging     |
| rs28531858 | <i>ND1</i>  | C3613G  | Nonsynonymous         | L103V      |                                          |                                             | Probably damaging     |
| rs28357968 | <i>ND1</i>  | G3666A  | Synonymous            | G120G      |                                          |                                             |                       |
| rs28557337 | <i>ND1</i>  | C3696T  | Synonymous            | I130I      |                                          |                                             |                       |
| rs28520658 | <i>ND1</i>  | T3732C  | Synonymous            | Y142T      |                                          |                                             |                       |
| rs28357970 | <i>ND1</i>  | A3796T  | Nonsynonymous         | T164S      |                                          |                                             | Benign                |
| rs28357972 | <i>ND1</i>  | G3918A  | Synonymous            | E204E      |                                          |                                             |                       |
| rs28429662 | <i>ND2</i>  | C4926T  | Nonsynonymous         | L153F      |                                          |                                             | Possibly damaging     |
| rs3020561  | <i>ND2</i>  | A4985G  | Synonymous            | Q172Q      |                                          | Thyroid tumor                               |                       |
| rs28494478 | <i>ND2</i>  | C5049G  | Nonsynonymous         | L194V      |                                          |                                             | Probably damaging     |
| rs28456039 | <i>ND2</i>  | A5319G  | Nonsynonymous         | T284S      |                                          |                                             |                       |
| rs28357987 | <i>ND2</i>  | T5393C  | Synonymous            | S308S      |                                          |                                             |                       |
| rs3021088  | <i>ND2</i>  | G5460A  | Nonsynonymous         | A331T      | AD; PD                                   |                                             | Benign                |
| rs28588369 | <i>CO1</i>  | G6016A  | Nonsynonymous         | R38Q       |                                          |                                             | Probably damaging     |
| rs28580752 | <i>CO1</i>  | G6028A  | Nonsynonymous         | G42D       |                                          |                                             | Probably damaging     |
| rs2856983  | <i>CO1</i>  | G6257A  | Synonymous            | V118V      |                                          |                                             |                       |
| rs28516468 | <i>CO1</i>  | C6455T  | Synonymous            | F184F      |                                          |                                             |                       |
| rs28721398 | <i>CO1</i>  | T6481C  | Nonsynonymous         | V193A      |                                          |                                             | Benign                |
| rs28461189 | <i>CO1</i>  | C6489G  | Nonsynonymous         | L196V      |                                          |                                             | Probably damaging     |
| rs28371932 | <i>CO1</i>  | T6505C  | Nonsynonymous         | V201A      |                                          |                                             | Probably damaging     |
| rs1064597  | <i>ATP6</i> | C8647G  | Nonsynonymous         | R41G       |                                          |                                             | Probably damaging     |
| rs28479867 | <i>ATP6</i> | G8648A  | Nonsynonymous         | R41Q       |                                          |                                             | Probably damaging     |
| rs2853822  | <i>ATP6</i> | C8655T  | Synonymous            | I43I       |                                          |                                             |                       |
| rs28624611 | <i>ATP6</i> | G8719A  | Premature Termination | GXTer      |                                          |                                             |                       |

| ID         | Gene            | Variant | Type of Variant | Amino Acid | Base Substitution Associated Phenotypes*                                                                        | Somatic Variant Associated Phenotypes* | PolyPhen-2 Prediction |
|------------|-----------------|---------|-----------------|------------|-----------------------------------------------------------------------------------------------------------------|----------------------------------------|-----------------------|
| rs2001031  | <i>ATP6</i>     | A8860G  | Nonsynonymous   | T112A      |                                                                                                                 |                                        | Benign                |
| rs28358269 | <i>ATP6</i>     | A9072G  | Synonymous      | S182S      |                                                                                                                 |                                        |                       |
| rs28434399 | <i>CO3</i>      | C9314T  | Synonymous      | H36H       |                                                                                                                 |                                        |                       |
| rs28474779 | <i>CO3</i>      | A9336G  | Nonsynonymous   | M44V       |                                                                                                                 |                                        | Benign                |
| rs2856984  | <i>CO3</i>      | C9559G  | Nonsynonymous   | P118R      |                                                                                                                 |                                        | Probably damaging     |
| rs2856985  | <i>CO3</i>      | G9755A  | Synonymous      | E183E      |                                                                                                                 |                                        |                       |
| rs2854139  | <i>CO3</i>      | C9818T  | Synonymous      | H204H      |                                                                                                                 |                                        |                       |
| rs28411821 | <i>CO3</i>      | T9824C  | Synonymous      | L206L      |                                                                                                                 |                                        |                       |
| rs28690056 | <i>CO3</i>      | T9909C  | Nonsynonymous   | F235L      |                                                                                                                 |                                        | Probably damaging     |
| rs28580363 | <i>CO3</i>      | G9912A  | Nonsynonymous   | E236K      |                                                                                                                 |                                        | Probably damaging     |
| rs28715301 | <i>CO3</i>      | G9942A  | Nonsynonymous   | D246N      |                                                                                                                 | Endometrial tumor                      | Probably damaging     |
| rs3134801  | <i>CO3</i>      | T9950C  | Synonymous      | V248V      |                                                                                                                 |                                        |                       |
| rs28374827 | <i>tRNA-Gly</i> | T10015A |                 |            |                                                                                                                 |                                        |                       |
| rs28358274 | <i>ND3</i>      | A10086G | Nonsynonymous   | N10D       | Hypertension end-stage renal disease                                                                            |                                        | Probably damaging     |
| rs3899188  | <i>ND3</i>      | T10115C | Synonymous      | I19I       |                                                                                                                 |                                        |                       |
| rs28409867 | <i>ND3</i>      | A10133C | Synonymous      | P25P       |                                                                                                                 |                                        |                       |
| rs28754574 | <i>ND3</i>      | A10135G | Nonsynonymous   | Q26R       |                                                                                                                 |                                        | Possibly damaging     |
| rs28358275 | <i>ND3</i>      | T10237C | Nonsynonymous   | I60T       | LHON                                                                                                            |                                        | Probably damaging     |
| rs28655588 | <i>ND3</i>      | G10260A | Nonsynonymous   | E68K       |                                                                                                                 |                                        | Possibly damaging     |
| rs28673954 | <i>ND3</i>      | T10370C | Synonymous      | Y104Y      |                                                                                                                 |                                        |                       |
| rs28358277 | <i>ND3</i>      | G10373A | Synonymous      | E105E      |                                                                                                                 |                                        |                       |
| rs2853826  | <i>ND3</i>      | A10398G | Nonsynonymous   | T114A      | PD protective factor; Longevity; Altered cell pH; Metabolic syndrome; Breast cancer risk; Haplogroup IJK marker | Thyroid tumor                          | Benign                |
| rs2853487  | <i>ND4L</i>     | G10589A | Synonymous      | L40L       |                                                                                                                 |                                        |                       |
| rs28532736 | <i>ND4L</i>     | T10590G | Nonsynonymous   | F41V       |                                                                                                                 |                                        | Possibly damaging     |
| rs28645634 | <i>ND4L</i>     | A10656G | Nonsynonymous   | M63V       |                                                                                                                 |                                        | Benign                |
| rs2853488  | <i>ND4L</i>     | G10688A | Synonymous      | V73V       |                                                                                                                 |                                        |                       |



| ID         | Gene             | Variant | Type of Variant | Amino Acid | Base Substitution Associated Phenotypes*                  | Somatic Variant Associated Phenotypes* | PolyPhen-2 Prediction |
|------------|------------------|---------|-----------------|------------|-----------------------------------------------------------|----------------------------------------|-----------------------|
| rs2857285  | <i>ND4</i>       | T10915C | Synonymous      | C52C       |                                                           |                                        |                       |
| rs2857286  | <i>ND4</i>       | C10984G | Synonymous      | L75L       |                                                           |                                        |                       |
| rs2853489  | <i>ND4</i>       | A11172G | Nonsynonymous   | N138S      |                                                           |                                        | Probably damaging     |
| rs2853490  | <i>ND4</i>       | G11176A | Synonymous      | Q139Q      |                                                           |                                        |                       |
| rs28617734 | <i>ND4</i>       | C11186T | Synonymous      | L143L      |                                                           |                                        |                       |
| rs28358285 | <i>ND4</i>       | T11299C | Synonymous      | T180T      |                                                           |                                        |                       |
| rs28609979 | <i>ND4</i>       | T11365C | Synonymous      | A202A      | Found in 1 HCM patient<br>Altered brain pH; sCJD patients |                                        |                       |
| rs2853493  | <i>ND4</i>       | A11467G | Synonymous      | L236L      |                                                           |                                        |                       |
| rs28371977 | <i>ND4</i>       | G11474A | Nonsynonymous   | G239S      |                                                           |                                        | Probably damaging     |
| rs28588421 | <i>ND4</i>       | T11547G | Nonsynonymous   | V263G      |                                                           |                                        | Benign                |
| rs2853495  | <i>ND4</i>       | G11719A | Synonymous      | G320G      |                                                           |                                        |                       |
| rs28396842 | <i>ND4</i>       | G11766T | Nonsynonymous   | R336L      |                                                           |                                        | Probably damaging     |
| rs28384199 | <i>ND4</i>       | C11777G | Nonsynonymous   | R340G      |                                                           |                                        | Probably damaging     |
| rs28439211 | <i>ND4</i>       | C11819G | Nonsynonymous   | L354V      |                                                           |                                        | Probably damaging     |
| rs28550734 | <i>ND4</i>       | C11840T | Synonymous      | L361L      |                                                           |                                        |                       |
| rs28713729 | <i>ND4</i>       | G11843A | Nonsynonymous   | A362T      |                                                           |                                        | Probably damaging     |
| rs28359169 | <i>ND4</i>       | G11969A | Nonsynonymous   | A404T      |                                                           |                                        | Benign                |
| rs2853497  | <i>ND4</i>       | G12007A | Synonymous      | W416W      |                                                           |                                        |                       |
| rs28639786 | <i>ND4</i>       | C12053T | Nonsynonymous   | R432W      |                                                           |                                        | Probably damaging     |
| rs28695839 | <i>ND4</i>       | C12112G | Synonymous      | P451P      |                                                           |                                        |                       |
| rs3134560  | <i>tRNA-His</i>  | G12192A |                 |            | MICM                                                      |                                        |                       |
| rs28469108 | <i>tRNA-Leu2</i> | G12275A |                 |            |                                                           |                                        |                       |
| rs28493891 | <i>tRNA-Leu2</i> | G12300A |                 |            | 3243 suppressor mutant                                    | Lung carcinoma cybrid                  |                       |
| rs28490236 | <i>ND5</i>       | A12340G | Nonsynonymous   | T2A        |                                                           |                                        | Unknown               |
| rs3134561  | <i>ND5</i>       | A12361G | Nonsynonymous   | T9A        | Nonalcoholic fatty liver disease                          |                                        | Unknown               |
| rs28709525 | <i>ND5</i>       | C12394T | Nonsynonymous   | L20F       |                                                           |                                        | Unknown               |
| rs28617389 | <i>ND5</i>       | G12406A | Nonsynonymous   | V24I       |                                                           |                                        | Benign                |
| rs28608480 | <i>ND5</i>       | T12477C | Synonymous      | S47S       | Possible HCM susceptibility                               |                                        |                       |
| rs28359172 | <i>ND5</i>       | A12612G | Synonymous      | V92V       |                                                           |                                        |                       |

| ID         | Gene | Variant | Type of Variant | Amino Acid | Base Substitution Associated Phenotypes *                                | Somatic Variant Associated Phenotypes *                           | PolyPhen-2 Prediction |
|------------|------|---------|-----------------|------------|--------------------------------------------------------------------------|-------------------------------------------------------------------|-----------------------|
| rs28410409 | ND5  | G12684A | Synonymous      | Q116Q      |                                                                          |                                                                   |                       |
| rs28359173 | ND5  | A12693G | Synonymous      | K119K      |                                                                          |                                                                   |                       |
| rs2853500  | ND5  | A12720G | Synonymous      | M128M      |                                                                          |                                                                   |                       |
| rs28719001 | ND5  | T12880G | Nonsynonymous   | F182V      |                                                                          |                                                                   | Probably damaging     |
| rs28448767 | ND5  | C13029T | Synonymous      | P231P      |                                                                          |                                                                   |                       |
| rs28477492 | ND5  | T13095G | Synonymous      | C523V      |                                                                          |                                                                   |                       |
| rs28604589 | ND5  | A13269G | Synonymous      | G211G      |                                                                          |                                                                   |                       |
| rs2853502  | ND5  | A13276G | Nonsynonymous   | M314V      |                                                                          |                                                                   | Benign                |
| rs28371809 | ND5  | C13384T | Nonsynonymous   | L350F      |                                                                          |                                                                   | Probably damaging     |
| rs28359176 | ND5  | A13485G | Synonymous      | M383M      |                                                                          |                                                                   |                       |
| rs28376363 | ND5  | C13492G | Nonsynonymous   | L386V      |                                                                          |                                                                   | Benign                |
| rs28359177 | ND5  | G13590A | Synonymous      | L418L      |                                                                          |                                                                   |                       |
| rs2854123  | ND5  | C13650T | Synonymous      | P438P      |                                                                          |                                                                   |                       |
| rs2853813  | ND5  | C13702G | Nonsynonymous   | R456G      |                                                                          |                                                                   | Probably damaging     |
| rs28359178 | ND5  | G13708A | Nonsynonymous   | A458T      | LHON; Increased MS risk; Higher frequency in PD-ADS; Haplogroup J marker | Acute leukemia platelets, leukocytes, & bone marrow; Breast tumor | Benign                |
| rs28630861 | ND5  | T13740C | Synonymous      | I468I      |                                                                          |                                                                   |                       |
| rs28562381 | ND5  | G13843T | Nonsynonymous   | D503Y      |                                                                          |                                                                   | Probably damaging     |
| rs28359185 | ND5  | T14000A | Nonsynonymous   | L555Q      |                                                                          |                                                                   | Probably damaging     |
| rs3900944  | ND5  | C14049T | Synonymous      | I571I      |                                                                          |                                                                   |                       |
| rs2853814  | ND6  | C14272G | Nonsynonymous   | L134F      |                                                                          |                                                                   | Probably damaging     |
| rs2853815  | ND6  | C14365G | Synonymous      | V103V      |                                                                          |                                                                   |                       |
| rs2853816  | ND6  | C14368G | Nonsynonymous   | L102F      |                                                                          |                                                                   | Probably damaging     |
| rs3135030  | ND6  | T14470C | Synonymous      | G68G       |                                                                          |                                                                   |                       |
| rs28496897 | ND6  | A14580G | Synonymous      | L32L       |                                                                          |                                                                   |                       |
| rs28357678 | ND6  | C14668T | Synonymous      | M2M        | MDD                                                                      |                                                                   |                       |
| rs2853504  | CYB  | A14793G | Nonsynonymous   | H16R       |                                                                          |                                                                   | Benign                |
| rs28357684 | CYB  | G15043C | Synonymous      | G99G       |                                                                          |                                                                   |                       |
| rs28357687 | CYB  | T15204C | Nonsynonymous   | I153T      |                                                                          |                                                                   | Benign                |
| rs2853506  | CYB  | A15218G | Nonsynonymous   | T158A      |                                                                          |                                                                   | Possibly damaging     |

| ID         | Gene            | Variant | Type of Variant | Amino Acid | Base Substitution Associated Phenotypes* | Somatic Variant Associated Phenotypes*    | PolyPhen-2 Prediction |
|------------|-----------------|---------|-----------------|------------|------------------------------------------|-------------------------------------------|-----------------------|
| rs3134742  | CYB             | C15223T | Synonymous      | D159D      |                                          |                                           |                       |
| rs28573847 | CYB             | G15301A | Synonymous      | L185L      |                                          | Tumor                                     |                       |
| rs2853507  | CYB             | G15317A | Nonsynonymous   | A191T      |                                          |                                           | Benign                |
| rs2853508  | CYB             | A15326G | Nonsynonymous   | T194A      |                                          |                                           | Benign                |
| rs2853509  | CYB             | G15431A | Nonsynonymous   | A229T      |                                          |                                           | Benign                |
| rs28357370 | CYB             | A15487T | Synonymous      | P247P      |                                          |                                           |                       |
| rs3134743  | CYB             | C15508T | Synonymous      | D254D      |                                          |                                           |                       |
| rs28357372 | CYB             | A15607G | Synonymous      | K287K      |                                          | Breast tumor                              |                       |
| rs28357373 | CYB             | T15629C | Synonymous      | L295L      |                                          | Breast tumor                              |                       |
| rs3094280  | CYB             | A15662G | Nonsynonymous   | I306V      | Complex mitochondriopathy-associated     | Breast tumor                              | Benign                |
| rs28357374 | CYB             | T15670C | Synonymous      | H308H      |                                          | Breast tumor                              |                       |
| rs28357375 | CYB             | T15784C | Synonymous      | P346P      | POAG- Potential for association          | Pancreatic cancer cell line; Breast tumor |                       |
| rs28357376 | CYB             | A15824G | Nonsynonymous   | T360A      |                                          | Breast tumor                              | Benign                |
| rs3094281  | CYB             | A15851G | Nonsynonymous   | I369V      |                                          |                                           | Benign                |
| rs2853510  | <i>tRNA-Thr</i> | A15923G |                 |            |                                          |                                           |                       |
| rs3094282  | <i>tRNA-Thr</i> | G15927A |                 |            | MS; DEAF1555 increased penetrance/CHD    |                                           |                       |
| rs28561372 | Non-coding      | A15954G |                 |            |                                          |                                           |                       |
| rs2853511  | Non-coding      | T16093C |                 |            | Cyclic vomiting syndrome                 | Breast & prostate tumors; Normal tissues  |                       |
| rs3134562  | Non-coding      | T16140C |                 |            |                                          |                                           |                       |
| rs34100702 | Non-coding      | C16184T |                 |            |                                          |                                           |                       |
| rs2853513  | Non-coding      | C16223T |                 |            |                                          | Tumor                                     |                       |
| rs2857289  | Non-coding      | C16256T |                 |            |                                          |                                           |                       |
| rs2857290  | Non-coding      | C16270T |                 |            | Melanoma patients                        |                                           |                       |
| rs34799580 | Non-coding      | T16311C |                 |            |                                          | Prostate tumor                            |                       |

\*MITOMAP

ND = NADH dehydrogenase; CYB = Cytochrome b; CO = Cytochrome c oxidase; ATP = ATP synthase; BD = Bipolar disorder; AD = Alzheimer's disease; LVNC = Left ventricular non-compaction cardiomyopathy; DEAF = Deafness; PD = Parkinson's disease; MELAS = Mitochondrial encephalomyopathy lactic acidosis and stroke-like episodes; LHON = Leber Hereditary optic neuropathy; sCJD = Sporadic Creutzfeldt-Jakob disease; MICM = Maternally inherited cardiomyopathy; HCM = Hypertrophic cardiomyopathy; MS = Multiple sclerosis; PD-ADS = Acquired demyelinating syndromes; MDD = Major depressive disorder; CHD = Coronary heart disease

**Table S24.** Illumina HumanHap550v3.0

| ID          | Gene            | Variant | Type of Variant | Amino Acid | Base Substitution Associated Phenotypes*  | Somatic Mutation Associated Phenotypes* | PolyPhen-2 Prediction |
|-------------|-----------------|---------|-----------------|------------|-------------------------------------------|-----------------------------------------|-----------------------|
| rs41473347  | Non-coding      | C182T   |                 |            |                                           | POLG/PEO muscle                         |                       |
| rs41323649  | Non-coding      | C228T   |                 |            |                                           |                                         |                       |
| rs41334645  | Non-coding      | G247A   |                 |            |                                           |                                         |                       |
| rs41528348  | Non-coding      | C295T   |                 |            |                                           | POLG/MNGIE muscle;<br>Glioblastoma      |                       |
| rs41356551  | Non-coding      | C456T   |                 |            |                                           | Thyroid tumor                           |                       |
| rs41402146  | Non-coding      | C462T   |                 |            |                                           | Thyroid tumor                           |                       |
| rs2853518   | <i>12S rRNA</i> | A750G   |                 |            |                                           |                                         |                       |
| rs28358569  | <i>12S rRNA</i> | A827G   |                 |            | DEAF; B4b'd marker                        |                                         |                       |
| rs2856982   | <i>12S rRNA</i> | C1018T  |                 |            |                                           |                                         |                       |
| rs2000974   | <i>12S rRNA</i> | C1048T  |                 |            |                                           |                                         |                       |
| rs2001030   | <i>12S rRNA</i> | A1438G  |                 |            |                                           |                                         |                       |
| rs3928305   | <i>16S rRNA</i> | G1719A  |                 |            |                                           |                                         |                       |
| rs193303006 | <i>16S rRNA</i> | A1736G  |                 |            |                                           |                                         |                       |
| rs28358579  | <i>16S rRNA</i> | T2352C  |                 |            | Possibly LVNC associated                  |                                         |                       |
| rs28445203  | <i>16S rRNA</i> | A2483G  |                 |            |                                           |                                         |                       |
| rs2854128   | <i>16S rRNA</i> | A2706T  |                 |            |                                           |                                         |                       |
| rs28358581  | <i>16S rRNA</i> | G2789A  |                 |            |                                           |                                         |                       |
| rs3928306   | <i>16S rRNA</i> | G3010A  |                 |            | Cyclic vomiting syndrome<br>with migraine |                                         |                       |

| ID          | Gene | Variant | Type of Variant | Amino Acid | Base Substitution Associated Phenotypes*                                               | Somatic Mutation Associated Phenotypes* | PolyPhen-2 Prediction |
|-------------|------|---------|-----------------|------------|----------------------------------------------------------------------------------------|-----------------------------------------|-----------------------|
| rs41423746  | ND1  | A3348G  | Synonymous      | L14L       |                                                                                        |                                         |                       |
| rs28358584  | ND1  | A3480G  | Synonymous      | K58K       |                                                                                        | Prostate tumor                          |                       |
| rs28358586  | ND1  | A3547G  | Nonsynonymous   | I81V       |                                                                                        |                                         | Benign                |
| rs2854134   | ND1  | A3593G  | Nonsynonymous   | V96A       |                                                                                        |                                         | Benign                |
| rs28357968  | ND1  | G3666A  | Synonymous      | G120G      |                                                                                        |                                         |                       |
| rs41355750  | ND1  | T3720C  | Synonymous      | Q138Q      |                                                                                        |                                         |                       |
| rs41524046  | ND1  | C3915T  | Synonymous      | G203G      |                                                                                        |                                         |                       |
| rs28357972  | ND1  | C3918T  | Synonymous      | E204E      |                                                                                        | Breast tumor                            |                       |
| rs879051705 | ND1  | C3992T  | Nonsynonymous   | T229M      |                                                                                        | Thyroid tumor                           | Benign                |
| rs41504646  | ND1  | C4024T  | Nonsynonymous   | T240S      |                                                                                        |                                         | Benign                |
| rs1117205   | ND1  | A4104G  | Synonymous      | L266L      |                                                                                        |                                         |                       |
| rs3021086   | ND2  | A4769G  | Synonymous      | M100M      |                                                                                        |                                         |                       |
| rs28357977  | ND2  | C4820T  | Synonymous      | E117E      |                                                                                        |                                         |                       |
| rs28357980  | ND2  | A4917G  | Nonsynonymous   | N150D      | LHON; Insulin resistance; AMD; NRTI-PN; Haplogroup T marker                            |                                         | Benign                |
| rs28357984  | ND2  | C5178A  | Nonsynonymous   | L237M      | Longevity; Extraversion MI; AMS protection; Blood iron metabolism; Haplogroup D marker |                                         | Probably damaging     |
| rs41320049  | ND2  | G5263A  | Nonsynonymous   | A265V      |                                                                                        |                                         | Benign                |
| rs41333444  | ND2  | A5390G  | Synonymous      | M307M      |                                                                                        |                                         |                       |
| rs3021088   | ND2  | G5460A  | Nonsynonymous   | A331T      | AD; PD                                                                                 |                                         | Benign                |
| rs7340122   | CO1  | A5951G  | Synonymous      | G16G       |                                                                                        |                                         |                       |
| rs28516468  | CO1  | C6455T  | Synonymous      | F184F      |                                                                                        |                                         |                       |
| rs41413745  | CO1  | C6734T  | Synonymous      | M277M      |                                                                                        |                                         |                       |
| rs41332953  | CO1  | T6752C  | Synonymous      | L283L      |                                                                                        |                                         |                       |
| rs1978002   | CO1  | A7055G  | Synonymous      | G384G      |                                                                                        | MNGIE fibroblasts                       |                       |
| rs41534044  | CO2  | A7768G  | Synonymous      | M61M       |                                                                                        |                                         |                       |
| rs28358883  | CO2  | G8206A  | Synonymous      | M207M      |                                                                                        |                                         |                       |
| rs41427749  | ATP6 | G8616T  | Nonsynonymous   | L30F       |                                                                                        |                                         | Probably damaging     |
| rs2853822   | ATP6 | C8655T  | Synonymous      | I43I       |                                                                                        |                                         |                       |

| ID          | Gene            | Variant | Type of Variant | Amino Acid | Base Substitution Associated Phenotypes*                                                                                    | Somatic Mutation Associated Phenotypes* | PolyPhen-2 Prediction |
|-------------|-----------------|---------|-----------------|------------|-----------------------------------------------------------------------------------------------------------------------------|-----------------------------------------|-----------------------|
| rs41513156  | <i>ATP6</i>     | A9093G  | Synonymous      | T189T      |                                                                                                                             |                                         |                       |
| rs28380140  | <i>CO3</i>      | A9377G  | Synonymous      | W57W       |                                                                                                                             |                                         |                       |
| rs2248727   | <i>CO3</i>      | T9540C  | Synonymous      | L112L      |                                                                                                                             | Tumor                                   |                       |
| rs41482146  | <i>CO3</i>      | A9667G  | Nonsynonymous   | N154S      |                                                                                                                             |                                         | Benign                |
| rs41347846  | <i>tRNA-Gly</i> | T10034C |                 |            |                                                                                                                             |                                         |                       |
| rs41467651  | <i>ND3</i>      | G10310A | Synonymous      | L84L       |                                                                                                                             |                                         |                       |
| rs2853826   | <i>ND3</i>      | A10398G | Nonsynonymous   | T114A      | PD protective factor;<br>Longevity; Altered cell pH;<br>Metabolic syndrome;<br>Breast cancer risk;<br>Haplogroup IJK marker | Thyroid tumor                           | Benign                |
| rs28358281  | <i>ND4L</i>     | G10586A | Synonymous      | S39S       |                                                                                                                             |                                         |                       |
| rs2853487   | <i>ND4L</i>     | C10589T | Synonymous      | L40L       |                                                                                                                             |                                         |                       |
| rs2853488   | <i>ND4L</i>     | G10688A | Synonymous      | V73V       |                                                                                                                             |                                         |                       |
| rs2857284   | <i>ND4</i>      | T10873C | Synonymous      | P38P       |                                                                                                                             |                                         |                       |
| rs193302938 | <i>ND4</i>      | C11377T | Synonymous      | K206K      |                                                                                                                             |                                         |                       |
| rs28471078  | <i>ND4</i>      | A11722G | Synonymous      | L321L      |                                                                                                                             |                                         |                       |
| rs2853496   | <i>ND4</i>      | C11914T | Synonymous      | T385T      |                                                                                                                             |                                         |                       |
| rs28359169  | <i>ND4</i>      | C11969T | Nonsynonymous   | A404T      |                                                                                                                             |                                         | Benign                |
| rs2853499   | <i>ND5</i>      | C12372T | Synonymous      | L12L       | Altered brain pH; sCJD patients                                                                                             | Prostate tumor                          |                       |
| rs41445245  | <i>ND5</i>      | G12630A | Synonymous      | W98W       |                                                                                                                             |                                         |                       |
| rs41369547  | <i>ND5</i>      | C12669T | Synonymous      | D111D      |                                                                                                                             |                                         |                       |
| rs28705385  | <i>ND5</i>      | T12850C | Nonsynonymous   | I172V      |                                                                                                                             |                                         | Possibly damaging     |
| rs2854123   | <i>ND5</i>      | G13650A | Synonymous      | P438P      |                                                                                                                             |                                         |                       |
| rs28357672  | <i>ND6</i>      | A14212G | Synonymous      | V154V      |                                                                                                                             |                                         |                       |
| rs527236043 | <i>CYB</i>      | C15043T | Synonymous      | G99G       | MDD                                                                                                                         |                                         |                       |
| rs28357685  | <i>CYB</i>      | G15110A | Nonsynonymous   | A122T      |                                                                                                                             |                                         | Benign                |
| rs41518645  | <i>CYB</i>      | C15257T | Nonsynonymous   | D171N      | LHON; Haplogroup J2 marker                                                                                                  |                                         | Benign                |
| rs28357371  | <i>CYB</i>      | G15535A | Synonymous      | N263N      |                                                                                                                             |                                         |                       |
| rs41504845  | <i>CYB</i>      | C15833T | Synonymous      | L363L      |                                                                                                                             |                                         |                       |

| ID          | Gene            | Variant | Type of Variant | Amino Acid | Base Substitution Associated Phenotypes*         | Somatic Mutation Associated Phenotypes*  | PolyPhen-2 Prediction |
|-------------|-----------------|---------|-----------------|------------|--------------------------------------------------|------------------------------------------|-----------------------|
| rs35788393  | <i>tRNA-Thr</i> | G15904A |                 |            |                                                  |                                          |                       |
| rs527236198 | <i>tRNA-Thr</i> | G15928A |                 |            | MS; Idiopathic repeat miscarriage; AD protection |                                          |                       |
| rs41441949  | <i>tRNA-Thr</i> | G15930A |                 |            |                                                  |                                          |                       |
| rs41534744  | Non-coding      | C16129T |                 |            | Cyclic vomiting syndrome with migraine           |                                          |                       |
| rs41419246  | Non-coding      | G16145A |                 |            |                                                  |                                          |                       |
| rs2854125   | Non-coding      | C16147T |                 |            |                                                  |                                          |                       |
| rs41479950  | Non-coding      | A16163G |                 |            |                                                  |                                          |                       |
| rs28671493  | Non-coding      | A16183C |                 |            | Melanoma patients                                | Lung tumor back-mutation; Prostate tumor |                       |
| rs2857290   | Non-coding      | C16270T |                 |            | Melanoma patients                                |                                          |                       |
| rs41458645  | Non-coding      | G16278A |                 |            |                                                  | Ovarian control tissue                   |                       |
| rs41355449  | Non-coding      | G16327A |                 |            |                                                  |                                          |                       |
| rs41378955  | Non-coding      | C16390T |                 |            | POAG- potential for association                  | Breast & ovarian tumors                  |                       |
| rs869031877 | Non-coding      | C16391T |                 |            |                                                  |                                          |                       |

\*MITOMAP

ND = NADH dehydrogenase; CYB = Cytochrome b; CO = Cytochrome c oxidase; ATP = ATP synthase; POLG = Mitochondrial DNA polymerase  $\gamma$ ; PEO = Progressive external ophthalmoplegia; MNGIE = Mitochondrial neurogastrointestinal encephalopathy; DEAF = Deafness; LVNC = Left ventricular non-compaction cardiomyopathy; LHON = Leber Hereditary optic neuropathy; AMD = Age-related macular degeneration; NRTI = Nucleoside reverse transcriptase inhibitor; MI = Myocardial infarction; AMS = ; AD = Alzheimer's disease; PD = Parkinson's disease; sCJD = Sporadic Creutzfeldt-Jaakob disease; MDD = Major depressive disorder; MS = Multiple sclerosis; POAG = Primary open angle glaucoma

**Table S25.** Illumina CardioMetaboChip

| ID     | Gene             | Variant | Type of Variant | Amino Acid | Base Substitution Associated Phenotypes*                      | Somatic Variant Associated Phenotypes*                  | PolyPhen-2 Prediction |
|--------|------------------|---------|-----------------|------------|---------------------------------------------------------------|---------------------------------------------------------|-----------------------|
| mt921  | <i>12S rRNA</i>  | T921C   |                 |            | Possibly LVNC-associated                                      |                                                         |                       |
| mt930  | <i>12S rRNA</i>  | G930A   |                 |            |                                                               |                                                         |                       |
| mt1018 | <i>12S rRNA</i>  | G1018A  |                 |            |                                                               |                                                         |                       |
| mt1243 | <i>12S rRNA</i>  | T1243C  |                 |            | Pancreatic cancer cell line                                   |                                                         |                       |
| mt1719 | <i>16S rRNA</i>  | G1719A  |                 |            |                                                               |                                                         |                       |
| mt1736 | <i>16S rRNA</i>  | A1736G  |                 |            |                                                               |                                                         |                       |
| mt1738 | <i>16S rRNA</i>  | T1738C  |                 |            |                                                               | Colorectal tumor                                        |                       |
| mt1811 | <i>16S rRNA</i>  | A1811G  |                 |            |                                                               | Head & neck tumors                                      |                       |
| mt1888 | <i>16S rRNA</i>  | G1888A  |                 |            |                                                               |                                                         |                       |
| mt2332 | <i>16S rRNA</i>  | C2332T  |                 |            |                                                               |                                                         |                       |
| mt2352 | <i>16S rRNA</i>  | T2352C  |                 |            | Possibly LVNC-associated                                      |                                                         |                       |
| mt2416 | <i>16S rRNA</i>  | T2416C  |                 |            |                                                               |                                                         |                       |
| mt2706 | <i>16S rRNA</i>  | A2706G  |                 |            |                                                               |                                                         |                       |
| mt2758 | <i>16S rRNA</i>  | G2758A  |                 |            |                                                               |                                                         |                       |
| mt2768 | <i>16S rRNA</i>  | A2768G  |                 |            |                                                               |                                                         |                       |
| mt2789 | <i>16S rRNA</i>  | C2789T  |                 |            |                                                               |                                                         |                       |
| mt2885 | <i>16S rRNA</i>  | T2885C  |                 |            |                                                               |                                                         |                       |
| mt3243 | <i>tRNA-Leu1</i> | A3243G  |                 |            |                                                               | Elderly brain and muscle;<br>Colon tumor;<br>Oncocytoma |                       |
| mt3308 | <i>ND1</i>       | T3308C  | Nonsynonymous   | M1T        | MELAS; DEAF enhancer;<br>Hypertension; LVNC;<br>Putative LHON | Colorectal tumor                                        | Probably damaging     |
| mt3348 | <i>ND1</i>       | A3348G  | Synonymous      | L14L       |                                                               |                                                         |                       |
| mt3394 | <i>ND1</i>       | T3394C  | Nonsynonymous   | Y30H       | LHON; Diabetes; CPT deficiency; High altitude adaptation      | Acute leukemia platelets, leukocytes, & bone marrow     |                       |
| mt3450 | <i>ND1</i>       | C3450T  | Synonymous      | P48P       |                                                               |                                                         |                       |
| mt3480 | <i>ND1</i>       | A3480G  | Synonymous      | K58K       |                                                               | Prostate tumor                                          |                       |
| mt3516 | <i>ND1</i>       | C3516A  | Synonymous      | L70L       |                                                               |                                                         |                       |
| mt3594 | <i>ND1</i>       | C3594T  | Synonymous      | V96V       |                                                               | Thyroid tumor                                           |                       |



| ID     | Gene            | Variant | Type of Variant | Amino Acid | Base Substitution Associated Phenotypes* | Somatic Variant Associated Phenotypes* | PolyPhen-2 Prediction |
|--------|-----------------|---------|-----------------|------------|------------------------------------------|----------------------------------------|-----------------------|
| mt3666 | <i>ND1</i>      | G3666A  | Synonymous      | G120G      |                                          |                                        |                       |
| mt3693 | <i>ND1</i>      | G3693A  | Synonymous      | L129L      |                                          |                                        |                       |
| mt3796 | <i>ND1</i>      | A3796T  | Nonsynonymous   | T164S      |                                          |                                        | Benign                |
| mt3843 | <i>ND1</i>      | A3843G  | Synonymous      | W179W      |                                          |                                        |                       |
| mt3915 | <i>ND1</i>      | G3915A  | Synonymous      | G203G      |                                          |                                        |                       |
| mt3918 | <i>ND1</i>      | G3918A  | Synonymous      | E204E      |                                          | Breast tumor                           |                       |
| mt4104 | <i>ND1</i>      | A4104G  | Synonymous      | L266L      |                                          |                                        |                       |
| mt4312 | <i>tRNA-Ile</i> | C4312T  |                 |            |                                          | Thyroid tumor                          |                       |
| mt4336 | <i>tRNA-Gln</i> | T4336C  |                 |            |                                          | AD; PD; Hearing loss & migraine        |                       |
| mt4580 | <i>ND2</i>      | G4580A  | Synonymous      | M37M       |                                          | Pancreatic cancer cell line            |                       |
| mt4715 | <i>ND2</i>      | A4715G  | Synonymous      | G82G       |                                          |                                        |                       |
| mt4928 | <i>ND2</i>      | T4928C  | Synonymous      | L153L      |                                          |                                        |                       |
| mt4977 | <i>ND2</i>      | T4977C  | Synonymous      | L170L      |                                          |                                        |                       |
| mt5237 | <i>ND2</i>      | G5237A  | Synonymous      | P256P      |                                          |                                        |                       |
| mt5393 | <i>ND2</i>      | T5393C  | Synonymous      | S308S      |                                          |                                        |                       |
| mt6719 | <i>CO1</i>      | T6719C  | Synonymous      | G272G      |                                          |                                        |                       |
| mt7867 | <i>CO2</i>      | C7867T  | Synonymous      | S94S       |                                          |                                        |                       |
| mt8206 | <i>CO2</i>      | G8206A  | Synonymous      | M207M      |                                          |                                        |                       |
| mt8869 | <i>ATP6</i>     | A8869G  | Nonsynonymous   | M115V      |                                          |                                        | Benign                |
| mt9055 | <i>ATP6</i>     | G9055A  | Nonsynonymous   | A177T      | PD-protective factor                     |                                        | Possibly damaging     |
| mt9072 | <i>ATP6</i>     | A9072G  | Synonymous      | S182S      |                                          |                                        |                       |
| mt9150 | <i>ATP6</i>     | A9150G  | Synonymous      | L208L      |                                          |                                        |                       |
| mt9347 | <i>CO3</i>      | A9347G  | Synonymous      | L47L       |                                          |                                        |                       |
| mt9540 | <i>CO3</i>      | T9540C  | Synonymous      | L112L      |                                          |                                        |                       |
| mt9554 | <i>CO3</i>      | G9554A  | Synonymous      | W116W      |                                          |                                        |                       |
| mt9698 | <i>CO3</i>      | T9698C  | Synonymous      | L164L      |                                          |                                        |                       |
| mt9755 | <i>CO3</i>      | G9755A  | Synonymous      | E183E      |                                          |                                        |                       |
| mt9818 | <i>CO3</i>      | C9818T  | Synonymous      | H204H      |                                          |                                        |                       |
| mt9899 | <i>CO3</i>      | T9899C  | Synonymous      | H231H      |                                          |                                        |                       |
| mt9950 | <i>CO3</i>      | T9950C  | Synonymous      | V248V      |                                          |                                        |                       |

| ID      | Gene             | Variant | Type of Variant | Amino Acid | Base Substitution Associated Phenotypes*                                                                 | Somatic Variant Associated Phenotypes*             | PolyPhen-2 Prediction |
|---------|------------------|---------|-----------------|------------|----------------------------------------------------------------------------------------------------------|----------------------------------------------------|-----------------------|
| mt10034 | <i>tRNA-Gly</i>  | T10034C |                 |            |                                                                                                          |                                                    |                       |
| mt10086 | <i>ND3</i>       | A10086G | Nonsynonymous   | N10D       | Hypertension end-stage renal disease                                                                     |                                                    | Probably damaging     |
| mt10115 | <i>ND3</i>       | T10115C | Synonymous      | I19I       |                                                                                                          |                                                    |                       |
| mt10238 | <i>ND3</i>       | T10238C | Synonymous      | I60I       |                                                                                                          |                                                    |                       |
| mt10321 | <i>ND3</i>       | T10321C | Nonsynonymous   | V88A       | Bladder tumor                                                                                            |                                                    |                       |
| mt10373 | <i>ND3</i>       | G10373A | Synonymous      | E105E      |                                                                                                          |                                                    |                       |
| mt10400 | <i>ND3</i>       | C10400T | Synonymous      | T114T      |                                                                                                          |                                                    |                       |
| mt10463 | <i>tRNA-Arg</i>  | T10463C |                 |            |                                                                                                          | Endometrium tumor                                  |                       |
| mt10550 | <i>ND4L</i>      | A10550G | Synonymous      | M27M       |                                                                                                          | Endometrium control tissue                         |                       |
| mt10664 | <i>ND4L</i>      | C10664T | Synonymous      | V65V       |                                                                                                          |                                                    |                       |
| mt10819 | <i>ND4</i>       | A10819G | Synonymous      | K20K       |                                                                                                          |                                                    |                       |
| mt10915 | <i>ND4</i>       | T10915C | Synonymous      | C52C       |                                                                                                          |                                                    |                       |
| mt11177 | <i>ND4</i>       | C11177T | Nonsynonymous   | P140S      |                                                                                                          |                                                    | Probably damaging     |
| mt11299 | <i>ND4</i>       | T11299C | Synonymous      | T180T      |                                                                                                          |                                                    |                       |
| mt11377 | <i>ND4</i>       | G11377A | Synonymous      | K206K      |                                                                                                          |                                                    |                       |
| mt11485 | <i>ND4</i>       | T11485C | Synonymous      | G242G      |                                                                                                          |                                                    |                       |
| mt11641 | <i>ND4</i>       | A11641G | Synonymous      | M294M      |                                                                                                          |                                                    |                       |
| mt11674 | <i>ND4</i>       | C11674T | Synonymous      | T305T      |                                                                                                          | Pancreatic cancer cell line; Prostate tumor        |                       |
| mt11812 | <i>ND4</i>       | A11812G | Synonymous      | L351L      |                                                                                                          |                                                    |                       |
| mt11899 | <i>ND4</i>       | T11899C | Synonymous      | S380S      |                                                                                                          |                                                    |                       |
| mt11914 | <i>ND4</i>       | G11914A | Synonymous      | T385T      |                                                                                                          |                                                    |                       |
| mt11969 | <i>ND4</i>       | G11969A | Nonsynonymous   | A404T      |                                                                                                          |                                                    | Benign                |
| mt12007 | <i>ND4</i>       | G12007A | Synonymous      | W416W      |                                                                                                          |                                                    |                       |
| mt12236 | <i>tRNA-Ser</i>  | G12236A |                 |            | DEAF                                                                                                     | Thyroid tumor                                      |                       |
| mt12308 | <i>tRNA-Leu2</i> | A12308G |                 |            | CPEO; Stroke; CM; Renal, breast, & prostate cancer risk; Altered brain pH; sCJD; Haplogroup K & U marker | Endometrium control tissue; Lung & prostate tumors |                       |

| ID      | Gene | Variant | Type of Variant | Amino Acid      | Base Substitution Associated Phenotypes*                                 | Somatic Variant Associated Phenotypes*                            | PolyPhen-2 Prediction |
|---------|------|---------|-----------------|-----------------|--------------------------------------------------------------------------|-------------------------------------------------------------------|-----------------------|
| mt12372 | ND5  | G12372A | Synonymous      | L12L            | Altered brain pH; sCJD patients                                          | Prostate tumor                                                    |                       |
| mt12414 | ND5  | T12414C | Synonymous      | P26P            |                                                                          | Pancreatic cancer cell line; Prostate tumor                       |                       |
| mt12519 | ND5  | T12519C | Synonymous      | V61V            |                                                                          | Bladder tumor                                                     |                       |
| mt12612 | ND5  | A12612G | Synonymous      | V92V            |                                                                          |                                                                   |                       |
| mt12633 | ND5  | C12633A | Synonymous      | S99S            |                                                                          |                                                                   |                       |
| mt12693 | ND5  | A12693G | Synonymous      | K119K           |                                                                          |                                                                   |                       |
| mt12705 | ND5  | C12705T | Synonymous      | I123I           |                                                                          | Prostate tumor                                                    |                       |
| mt12720 | ND5  | A12720G | Synonymous      | M128M           |                                                                          |                                                                   |                       |
| mt12810 | ND5  | A12810G | Synonymous      | W158W           |                                                                          |                                                                   |                       |
| mt13020 | ND5  | T13020C | Synonymous      | G228G           |                                                                          |                                                                   |                       |
| mt13105 | ND5  | A13105G | Nonsynonymous   | I257V           |                                                                          |                                                                   | Benign                |
| mt13263 | ND5  | A13263G | Synonymous      | Q309Q           |                                                                          |                                                                   |                       |
| mt13485 | ND5  | A13485G | Synonymous      | M383M           |                                                                          |                                                                   |                       |
| mt13590 | ND5  | G13590A | Synonymous      | L418L           |                                                                          |                                                                   |                       |
| mt13650 | ND5  | C13650T | Synonymous      | P438P           |                                                                          |                                                                   |                       |
| mt13708 | ND5  | G13708A | Nonsynonymous   | A458T           | LHON; Increased MS risk; Higher frequency in PD-ADS; Haplogroup J marker | Acute leukemia platelets, leukocytes, & bone marrow; Breast tumor | Benign                |
| mt13789 | ND5  | T13789C | Nonsynonymous   | Y485H           |                                                                          |                                                                   | Probably damaging     |
| mt13803 | ND5  | A13803G | Synonymous      | T489T           |                                                                          |                                                                   |                       |
| mt13880 | ND5  | C13880A | Nonsynonymous   | S515Y           |                                                                          |                                                                   | Possibly damaging     |
| mt13886 | ND5  | T13886C | Nonsynonymous   | L517P           |                                                                          |                                                                   | Benign                |
| mt13928 | ND5  | G13928C | Nonsynonymous   | S531T           |                                                                          |                                                                   | Possibly damaging     |
| mt13934 | ND5  | C13934T | Nonsynonymous   | T533M           |                                                                          |                                                                   | Benign                |
| mt13966 | ND5  | A13966G | Nonsynonymous   | T544A           |                                                                          |                                                                   | Benign                |
| mt14000 | ND5  | T14000A | Nonsynonymous   | L555Q           |                                                                          |                                                                   | Probably damaging     |
| mt14088 | ND5  | T14088C | Synonymous      | I584I           |                                                                          |                                                                   |                       |
| mt14148 | ND5  | A14148G | Synonymous      | Term604<br>Term |                                                                          |                                                                   |                       |

| ID      | Gene            | Variant | Type of Variant | Amino Acid | Base Substitution Associated Phenotypes*         | Somatic Variant Associated Phenotypes* | PolyPhen-2 Prediction |
|---------|-----------------|---------|-----------------|------------|--------------------------------------------------|----------------------------------------|-----------------------|
| mt14152 | ND6             | A14152G | Synonymous      | N174N      |                                                  |                                        |                       |
| mt14167 | ND6             | C14167T | Synonymous      | E169E      |                                                  |                                        |                       |
| mt14284 | ND6             | C14284T | Synonymous      | E130E      |                                                  |                                        |                       |
| mt14318 | ND6             | T14318C | Nonsynonymous   | N119S      |                                                  |                                        | Benign                |
| mt14766 | CYB             | C14766T | Nonsynonymous   | T7I        |                                                  |                                        | Benign                |
| mt14769 | CYB             | A14769G | Nonsynonymous   | N8S        |                                                  |                                        | Probably damaging     |
| mt14783 | CYB             | T14783C | Synonymous      | L13L       |                                                  |                                        |                       |
| mt14905 | CYB             | G14905A | Synonymous      | M53M       |                                                  |                                        |                       |
| mt14911 | CYB             | C14911T | Synonymous      | Y55Y       |                                                  |                                        |                       |
| mt15043 | CYB             | G15043A | Synonymous      | G99G       | MDD-associated                                   |                                        |                       |
| mt15110 | CYB             | G15110A | Nonsynonymous   | A122T      |                                                  |                                        | Benign                |
| mt15136 | CYB             | C15136T | Synonymous      | G130G      |                                                  |                                        |                       |
| mt15204 | CYB             | T15204C | Nonsynonymous   | I153T      |                                                  |                                        | Benign                |
| mt15217 | CYB             | G15217A | Synonymous      | G157G      |                                                  |                                        |                       |
| mt15244 | CYB             | A15244G | Synonymous      | G166G      |                                                  |                                        |                       |
| mt15301 | CYB             | G15301A | Synonymous      | L185L      |                                                  | Tumor                                  |                       |
| mt15311 | CYB             | A15311G | Nonsynonymous   | I189V      |                                                  |                                        | Benign                |
| mt15431 | CYB             | G15431A | Nonsynonymous   | A229T      |                                                  |                                        | Benign                |
| mt15452 | CYB             | C15452A | Nonsynonymous   | L236I      |                                                  |                                        | Benign                |
| mt15535 | CYB             | C15535T | Synonymous      | N263N      |                                                  | Breast tumor                           |                       |
| mt15607 | CYB             | A15607G | Synonymous      | K287K      |                                                  | Breast tumor                           |                       |
| mt15670 | CYB             | T15670C | Synonymous      | H308H      |                                                  | Breast tumor                           |                       |
| mt15824 | CYB             | A15824G | Nonsynonymous   | T360A      |                                                  | Breast tumor                           | Benign                |
| mt15833 | CYB             | C15833T | Synonymous      | L363L      |                                                  |                                        |                       |
| mt15904 | <i>tRNA-Thr</i> | C15904T |                 |            |                                                  |                                        |                       |
| mt15924 | <i>tRNA-Thr</i> | A15924G |                 |            | LIMM                                             |                                        |                       |
| mt15928 | <i>tRNA-Thr</i> | G15928A |                 |            | MS; Idiopathic repeat miscarriage; AD protection |                                        |                       |
| mt15942 | <i>tRNA-Thr</i> | T15942C |                 |            | Possibly LVNC-associated                         |                                        |                       |
| mt16189 | Non-coding      | T16189C |                 |            | Diabetes; Cardiomyopathy;                        | Prostate tumor; Normal buccal swab     |                       |

| ID | Gene | Variant | Type of Variant | Amino Acid | Base Substitution Associated Phenotypes*                                                   | Somatic Variant Associated Phenotypes* | PolyPhen-2 Prediction |
|----|------|---------|-----------------|------------|--------------------------------------------------------------------------------------------|----------------------------------------|-----------------------|
|    |      |         |                 |            | Endometrial cancer risk;<br>mtDNA copy number;<br>Metabolic syndrome;<br>Melanoma patients |                                        |                       |

**\*MITOMAP**

ND = NADH dehydrogenase; CYB = Cytochrome b; CO = Cytochrome c oxidase; ATP = ATP synthase; LVNC = Left ventricular non-compaction cardiomyopathy; MELAS = Mitochondrial encephalopathy, lactic acidosis, and stroke-like episodes; DEAF = Deafness; LHON = Leber Hereditary optic neuropathy; CPT = Carnitine palmitoyltransferase deficiency; AD = Alzheimer's disease; PD = Parkinson's disease; PD-ADS = Acquired demyelinating syndromes; PEO = Progressive external ophthalmoplegia; CM = Cardiomyopathy; sCJD = Sporadic Creutzfeldt-Jakob disease; MS = Multiple sclerosis; MDD = Major depressive disorder; L IMM = Lethal infantile mitochondrial myopathy

**Table S26.** Illumina Human 610 Quad v1

| ID        | Gene       | Variant | Type of Variant | Amino Acid | Base Substitution Associated Phenotypes | Somatic Variant Associated Phenotypes* | PolyPhen-2 Prediction |
|-----------|------------|---------|-----------------|------------|-----------------------------------------|----------------------------------------|-----------------------|
| MitoT217C | Non-Coding | T217C   |                 |            |                                         |                                        |                       |
| MitoG228A | Non-Coding | G228A   |                 |            |                                         |                                        |                       |
| MitoG247A | Non-Coding | G247A   |                 |            |                                         |                                        |                       |
| MitoC295T | Non-Coding | C295T   |                 |            |                                         | POLG/MNGIE muscle;<br>Glioblastoma     |                       |
| MitoC458T | Non-Coding | C456T   |                 |            |                                         | Thyroid tumor                          |                       |
| MitoC464T | Non-Coding | C462T   |                 |            |                                         | Thyroid tumor                          |                       |

| ID         | Gene            | Variant | Type of Variant | Amino Acid | Base Substitution Associated Phenotypes | Somatic Variant Associated Phenotypes* | PolyPhen-2 Prediction |
|------------|-----------------|---------|-----------------|------------|-----------------------------------------|----------------------------------------|-----------------------|
| MitoT479C  | Non-Coding      | T477C   |                 |            |                                         | AD brains; Ovarian tumor               |                       |
| MitoT491C  | Non-Coding      | T489C   |                 |            |                                         | Ovarian carcinoma; Prostate tumor      |                       |
| MitoG752A  | <i>12S rRNA</i> | A750G   |                 |            |                                         |                                        |                       |
| MitoA829G  | <i>12S rRNA</i> | A827G   |                 |            | DEAF; B4b'd marker                      |                                        |                       |
| MitoC1050T | <i>12S rRNA</i> | C1048T  |                 |            |                                         |                                        |                       |
| MitoT1191C | <i>12S rRNA</i> | T1189C  |                 |            |                                         |                                        |                       |
| MitoG1440A | <i>12S rRNA</i> | A1438G  |                 |            |                                         |                                        |                       |
| MitoG1721A | <i>16S rRNA</i> | G1719A  |                 |            |                                         |                                        |                       |
| MitoA1738G | <i>16S rRNA</i> | A1736G  |                 |            |                                         |                                        |                       |
| MitoT2160C | <i>16S rRNA</i> | T2158C  |                 |            |                                         |                                        |                       |
| MitoC2485T | <i>16S rRNA</i> | T2483C  |                 |            |                                         |                                        |                       |
| MitoG2708A | <i>16S rRNA</i> | A2706G  |                 |            |                                         |                                        |                       |
| MitoC2791T | <i>16S rRNA</i> | C2789T  |                 |            |                                         |                                        |                       |
| MitoT2887C | <i>16S rRNA</i> | T2885C  |                 |            |                                         |                                        |                       |
| MitoG3012A | <i>16S rRNA</i> | G3010A  |                 |            | Cyclic vomiting syndrome with migraine  |                                        |                       |
| MitoT3198C | <i>16S rRNA</i> | T3197C  |                 |            |                                         |                                        |                       |
| MitoA3349G | <i>ND1</i>      | A3348G  | Synonymous      | L14L       |                                         |                                        |                       |

| ID         | Gene            | Variant | Type of Variant | Amino Acid | Base Substitution Associated Phenotypes                  | Somatic Variant Associated Phenotypes*              | PolyPhen-2 Prediction |
|------------|-----------------|---------|-----------------|------------|----------------------------------------------------------|-----------------------------------------------------|-----------------------|
| MitoT3395C | <i>ND1</i>      | T3394C  | Nonsynonymous   | Y30H       | LHON; Diabetes; CPT deficiency; High altitude adaptation | Acute leukemia platelets, leukocytes, & bone marrow | Benign                |
| MitoA3481G | <i>ND1</i>      | A3480G  | Synonymous      | K58K       |                                                          | Prostate tumor                                      |                       |
| MitoC3595T | <i>ND1</i>      | C3594T  | Synonymous      | V96V       |                                                          | Thyroid tumor                                       |                       |
| MitoG3667A | <i>ND1</i>      | G3666A  | Synonymous      | G120G      |                                                          |                                                     |                       |
| MitoA3721G | <i>ND1</i>      | A3720G  | Synonymous      | Q138Q      |                                                          |                                                     |                       |
| MitoG3916A | <i>ND1</i>      | G3915A  | Synonymous      | G203G      |                                                          |                                                     |                       |
| MitoG3919A | <i>ND1</i>      | G3918A  | Synonymous      | E204E      |                                                          | Breast tumor                                        |                       |
| MitoC3971T | <i>ND1</i>      | C3970T  | Synonymous      | L222L      |                                                          |                                                     |                       |
| MitoC3993T | <i>ND1</i>      | C3992T  | Nonsynonymous   | T229M      |                                                          | Thyroid tumor                                       | Benign                |
| MitoA4025G | <i>ND1</i>      | A4024G  | Nonsynonymous   | T240A      |                                                          |                                                     | Benign                |
| MitoT4337C | <i>tRNA-Gln</i> | T4336C  |                 |            | AD; PD; Hearing loss & migraine                          |                                                     |                       |
| MitoT4562C | <i>ND2</i>      | T4561C  | Nonsynonymous   | V31A       |                                                          |                                                     | Benign                |
| MitoG4770A | <i>ND2</i>      | A4769G  | Synonymous      | M100M      |                                                          |                                                     |                       |
| MitoG4821A | <i>ND2</i>      | G4820A  | Synonymous      | E117E      |                                                          |                                                     |                       |
| MitoA4825G | <i>ND2</i>      | A4824G  | Nonsynonymous   | T119A      |                                                          |                                                     | Possibly damaging     |

| ID         | Gene                       | Variant | Type of Variant | Amino Acid | Base Substitution Associated Phenotypes                     | Somatic Variant Associated Phenotypes* | PolyPhen-2 Prediction |
|------------|----------------------------|---------|-----------------|------------|-------------------------------------------------------------|----------------------------------------|-----------------------|
| MitoC4884T | <i>ND2</i>                 | C4883T  | Synonymous      | P138P      | Glaucoma                                                    |                                        |                       |
| MitoA4918G | <i>ND2</i>                 | A4917G  | Nonsynonymous   | N150D      | LHON; Insulin resistance; AMD; NRTI-PN; Haplogroup T marker |                                        | Benign                |
| MitoT4978C | <i>ND2</i>                 | T4977C  | Synonymous      | L170L      |                                                             |                                        |                       |
| MitoT5005C | <i>ND2</i>                 | T5004C  | Synonymous      | L179L      |                                                             |                                        |                       |
| MitoG5047A | <i>ND2</i>                 | G5046A  | Nonsynonymous   | V193I      |                                                             |                                        | Benign                |
| MitoC5264T | <i>ND2</i>                 | C5263T  | Nonsynonymous   | A265V      |                                                             |                                        | Benign                |
| MitoA5391G | <i>ND2</i>                 | A5390G  | Synonymous      | M307M      |                                                             |                                        |                       |
| MitoT5443C | <i>ND2</i>                 | T5442C  | Nonsynonymous   | F325L      |                                                             |                                        | Benign                |
| MitoG5461A | <i>ND2</i>                 | G5460A  | Nonsynonymous   | A331T      | AD; PD                                                      |                                        | Benign                |
| MitoT5496C | <i>ND2</i>                 | T5495C  | Synonymous      | F342F      |                                                             |                                        |                       |
| MitoA5657G | <i>Non-Coding tRNA-Cys</i> | A5656G  |                 |            |                                                             |                                        |                       |
| MitoG5774A |                            | G5773A  |                 |            |                                                             |                                        |                       |
| MitoA5952G | <i>CO1</i>                 | A5951G  | Synonymous      | G16G       |                                                             |                                        |                       |
| MitoC6046T | <i>CO1</i>                 | C6045T  | Synonymous      | L48L       |                                                             |                                        |                       |
| MitoG6027A | <i>CO1</i>                 | G6026A  | Synonymous      | L41L       |                                                             |                                        |                       |
| MitoT6153C | <i>CO1</i>                 | T6152C  | Synonymous      | V83V       |                                                             |                                        |                       |
| MitoT6222C | <i>CO1</i>                 | T6221C  | Synonymous      | P106P      |                                                             |                                        |                       |
| MitoG6261A | <i>CO1</i>                 | G6260A  | Synonymous      | E119E      |                                                             |                                        |                       |
| MitoT6681C | <i>CO1</i>                 | T6680C  | Synonymous      | T259T      |                                                             |                                        |                       |
| MitoG6735A | <i>CO1</i>                 | G6734A  | Synonymous      | M277M      |                                                             |                                        |                       |
| MitoA6753G | <i>CO1</i>                 | A6752G  | Synonymous      | L283L      |                                                             |                                        |                       |



| ID          | Gene            | Variant | Type of Variant | Amino Acid  | Base Substitution Associated Phenotypes | Somatic Variant Associated Phenotypes* | PolyPhen-2 Prediction |
|-------------|-----------------|---------|-----------------|-------------|-----------------------------------------|----------------------------------------|-----------------------|
| MitoT6777C  | <i>CO1</i>      | T6776C  | Synonymous      | H291H       |                                         | Breast cystic masses                   |                       |
| MitoA7056G  | <i>CO1</i>      | A7055G  | Synonymous      | G384G       |                                         | MNGIE fibroblasts                      |                       |
| MitoT7176C  | <i>CO1</i>      | T7175C  | Synonymous      | T424T       |                                         |                                        |                       |
| MitoC7275T  | <i>CO1</i>      | C7274T  | Synonymous      | G457G       |                                         |                                        |                       |
| MitoG7522A  | <i>tRNA-Asp</i> | G7521A  |                 |             |                                         | Thyroid tumor                          |                       |
| MitoA7769G  | <i>CO2</i>      | A7768G  | Synonymous      | M61M        |                                         |                                        |                       |
| MitoG8270A  | <i>CO2</i>      | G8269A  | Synonymous      | Term228Term |                                         |                                        |                       |
| MitoT8278C  | Non-Coding      | T8277C  |                 |             |                                         |                                        |                       |
| MitoG8617T  | <i>ATP6</i>     | G8616T  | Nonsynonymous   | L30F        |                                         |                                        | Probably damaging     |
| MitoC8656T  | <i>ATP6</i>     | C8655T  | Synonymous      | I43I        |                                         |                                        |                       |
| MitoA8870G  | <i>ATP6</i>     | A8869G  | Nonsynonymous   | M115V       |                                         |                                        | Benign                |
| MitoA9073G  | <i>ATP6</i>     | A9072G  | Synonymous      | S182S       |                                         |                                        |                       |
| MitoA9094G  | <i>ATP6</i>     | A9093G  | Synonymous      | T189T       |                                         |                                        |                       |
| MitoG9378A  | <i>CO3</i>      | A9377G  | Synonymous      | W57W        |                                         |                                        |                       |
| MitoC9541T  | <i>CO3</i>      | T9540C  | Synonymous      | L112L       |                                         | Tumor                                  |                       |
| MitoA9668G  | <i>CO3</i>      | A9667G  | Nonsynonymous   | N154S       |                                         |                                        | Benign                |
| MitoT9699C  | <i>COX3</i>     | T9698C  | Synonymous      | L164L       |                                         |                                        |                       |
| MitoT9717C  | <i>COX3</i>     | T9716C  | Synonymous      | G170G       |                                         |                                        |                       |
| MitoT9900C  | <i>COX3</i>     | T9899C  | Synonymous      | H231H       |                                         |                                        |                       |
| MitoT9951C  | <i>COX3</i>     | T9950C  | Synonymous      | V248V       |                                         |                                        |                       |
| MitoT10035C | <i>tRNA-Gly</i> | T10034C |                 |             |                                         |                                        |                       |
| MitoA10045G | <i>tRNA-Gly</i> | A10044G |                 |             |                                         | SIDS                                   |                       |

| ID          | Gene            | Variant | Type of Variant | Amino Acid | Base Substitution Associated Phenotypes                                                                         | Somatic Variant Associated Phenotypes* | PolyPhen-2 Prediction |
|-------------|-----------------|---------|-----------------|------------|-----------------------------------------------------------------------------------------------------------------|----------------------------------------|-----------------------|
| MitoT10239C | <i>ND3</i>      | T10238C | Synonymous      | I60I       |                                                                                                                 |                                        |                       |
| MitoG10311A | <i>ND3</i>      | G10310A | Synonymous      | L84L       |                                                                                                                 |                                        |                       |
| MitoT10322C | <i>ND3</i>      | T10321C | Nonsynonymous   | V88A       |                                                                                                                 | Bladder tumor                          | Benign                |
| MitoG10399A | <i>ND3</i>      | A10398G | Nonsynonymous   | T114A      | PD protective factor; Longevity; Altered cell pH; Metabolic syndrome; Breast cancer risk; Haplogroup IJK marker | Thyroid tumor                          | Benign                |
| MitoT10464C | <i>tRNA-Arg</i> | T10463C |                 |            |                                                                                                                 | Endometrial tumor                      |                       |
| MitoA10551G | <i>ND4L</i>     | A10550G | Synonymous      | M27M       |                                                                                                                 | Endometrial control tissue             |                       |
| MitoG10587A | <i>ND4L</i>     | G10586A | Synonymous      | S39S       |                                                                                                                 |                                        |                       |
| MitoG10590A | <i>ND4L</i>     | G10589A | Synonymous      | L40L       |                                                                                                                 |                                        |                       |
| MitoG10689A | <i>ND4L</i>     | G10688A | Synonymous      | V73V       |                                                                                                                 |                                        |                       |
| MitoC10874T | <i>ND4</i>      | T10873C | Synonymous      | P38P       |                                                                                                                 |                                        |                       |
| MitoT10916C | <i>ND4</i>      | T10915C | Synonymous      | C52C       |                                                                                                                 |                                        |                       |
| MitoA11252G | <i>ND4</i>      | A11251G | Synonymous      | L164L      |                                                                                                                 |                                        |                       |
| MitoG11378A | <i>ND4</i>      | G11377A | Synonymous      | K206K      |                                                                                                                 |                                        |                       |
| MitoA11468G | <i>ND4</i>      | A11467G | Synonymous      | L236L      | Altered brain pH; sCJD patients                                                                                 |                                        |                       |
| MitoT11486C | <i>ND4</i>      | T11485C | Synonymous      | G242G      |                                                                                                                 |                                        |                       |

| ID          | Gene             | Variant | Type of Variant | Amino Acid | Base Substitution Associated Phenotypes                                                                  | Somatic Variant Associated Phenotypes*             | PolyPhen-2 Prediction |
|-------------|------------------|---------|-----------------|------------|----------------------------------------------------------------------------------------------------------|----------------------------------------------------|-----------------------|
| MitoT11900C | <i>ND4</i>       | T11899C | Synonymous      | S380S      |                                                                                                          |                                                    |                       |
| MitoG11915A | <i>ND4</i>       | G11914A | Synonymous      | T385T      |                                                                                                          |                                                    |                       |
| MitoA12309G | <i>tRNA-Leu2</i> | A12308G |                 |            | CPEO; Stroke; CM; Breast, renal, & prostate cancer risk; Altered brain pH; sCJD; Haplogroup K & U marker | Endometrial control tissue; Lung & prostate tumors |                       |
| MitoG12373A | <i>ND5</i>       | G12372A | Synonymous      | L12L       | Altered brain pH; sCJD patients                                                                          | Prostate tumor                                     |                       |
| MitoG12631A | <i>ND5</i>       | G12630A | Synonymous      | W98W       |                                                                                                          |                                                    |                       |
| MitoC12670T | <i>ND5</i>       | C12669T | Synonymous      | D111D      |                                                                                                          |                                                    |                       |
| MitoT12706C | <i>ND5</i>       | C12705T | Synonymous      | I123I      |                                                                                                          | Prostate tumor                                     |                       |
| MitoG12851A | <i>ND5</i>       | A12850G | Nonsynonymous   | I172V      |                                                                                                          |                                                    | Possibly damaging     |
| MitoA13106G | <i>ND5</i>       | A13105G | Nonsynonymous   | I257V      |                                                                                                          |                                                    | Benign                |
| MitoA13264G | <i>ND5</i>       | A13263G | Synonymous      | Q309Q      |                                                                                                          |                                                    |                       |
| MitoC13651T | <i>ND5</i>       | C13650T | Synonymous      | P438P      |                                                                                                          |                                                    |                       |
| MitoA13781G | <i>ND5</i>       | A13780G | Nonsynonymous   | I482V      |                                                                                                          |                                                    | Benign                |
| MitoT13790C | <i>ND5</i>       | T13789C | Nonsynonymous   | Y485H      |                                                                                                          |                                                    | Probably damaging     |

| ID          | Gene            | Variant | Type of Variant | Amino Acid | Base Substitution Associated Phenotypes | Somatic Variant Associated Phenotypes*    | PolyPhen-2 Prediction |
|-------------|-----------------|---------|-----------------|------------|-----------------------------------------|-------------------------------------------|-----------------------|
| MitoT13966C | <i>ND5</i>      | T13965C | Synonymous      | L543L      |                                         |                                           |                       |
| MitoT14179C | <i>ND6</i>      | T14178C | Nonsynonymous   | I166V      |                                         |                                           | Benign                |
| MitoA14234G | <i>ND6</i>      | A14233G | Synonymous      | D147D      |                                         |                                           |                       |
| MitoA14583G | <i>ND6</i>      | A14582G | Nonsynonymous   | V31A       |                                         |                                           | Benign                |
| MitoT14799C | <i>CYB</i>      | T14798C | Nonsynonymous   | F18L       |                                         | Glioblastoma                              | Benign                |
| MitoG15044A | <i>CYB</i>      | G15043A | Synonymous      | G99G       | MDD-associated                          |                                           |                       |
| MitoA15245G | <i>CYB</i>      | A15244G | Synonymous      | G166G      |                                         |                                           |                       |
| MitoG15258A | <i>CYB</i>      | G15257A | Nonsynonymous   | D171N      | LHON; Haplogroup J2 marker              |                                           | Benign                |
| MitoA15302G | <i>CYB</i>      | G15301A | Synonymous      | L185L      |                                         | Tumor                                     |                       |
| MitoC15536T | <i>CYB</i>      | C15535T | Synonymous      | N263N      |                                         |                                           |                       |
| MitoT15671C | <i>CYB</i>      | T15670C | Synonymous      | H308H      |                                         | Breast tumor                              |                       |
| MitoA15759G | <i>CYB</i>      | A15758G | Nonsynonymous   | I338V      |                                         |                                           | Benign                |
| MitoT15785C | <i>CYB</i>      | T15784C | Synonymous      | P346P      | POAG- potential for association         | Pancreatic cancer cell line; Breast tumor |                       |
| MitoC15834T | <i>CYB</i>      | C15833T | Synonymous      | L363L      |                                         |                                           |                       |
| MitoC15905T | <i>tRNA-Thr</i> | C15904T |                 |            |                                         |                                           |                       |
| MitoA15925G | <i>tRNA-Thr</i> | A15924G |                 |            | LIMM                                    |                                           |                       |

| ID          | Gene            | Variant | Type of Variant | Amino Acid | Base Substitution Associated Phenotypes          | Somatic Variant Associated Phenotypes*   | PolyPhen-2 Prediction |
|-------------|-----------------|---------|-----------------|------------|--------------------------------------------------|------------------------------------------|-----------------------|
| MitoG15929A | <i>tRNA-Thr</i> | G15928A |                 |            | MS; Idiopathic repeat miscarriage; AD protection |                                          |                       |
| MitoG15931A | <i>tRNA-Thr</i> | G15930A |                 |            |                                                  |                                          |                       |
| MitoG16130A | Non-Coding      | G16129A |                 |            | Cyclic vomiting syndrome with migraine           |                                          |                       |
| MitoT16145C | Non-Coding      | T16144C |                 |            |                                                  |                                          |                       |
| MitoG16146A | Non-Coding      | G16145A |                 |            |                                                  |                                          |                       |
| MitoC16149T | Non-Coding      | C16148T |                 |            |                                                  | Aging brains                             |                       |
| MitoA16163G | Non-Coding      | A16162G |                 |            |                                                  |                                          |                       |
| MitoA16164G | Non-Coding      | A16163G |                 |            |                                                  |                                          |                       |
| MitoC16184A | Non-Coding      | A16183C |                 |            | Melanoma patients                                | Lung tumor back-mutation; Prostate tumor |                       |
| MitoC16272T | Non-Coding      | C16270T |                 |            | Melanoma patients                                |                                          |                       |
| MitoC16329T | Non-Coding      | C16327T |                 |            |                                                  |                                          |                       |
| MitoG16392A | Non-Coding      | G16390A |                 |            | POAG-potential for association                   | Breast & ovarian tumors                  |                       |
| MitoG16393A | Non-Coding      | G16391A |                 |            |                                                  |                                          |                       |

\*MITOMAP

ND = NADH dehydrogenase; CYB = Cytochrome b; CO = Cytochrome c oxidase; ATP = ATP synthase; POLG = Mitochondrial DNA polymerase  $\gamma$ ; MNGIE = Mitochondrial neurogastrointestinal encephalopathy; AD = Alzheimer's disease; DEAF = Deafness; LHON = Leber Hereditary optic neuropathy; CPT = Carnitine palmitoyltransferase deficiency; PD = Parkinson's disease; AMD = Age-related macular degeneration; NRTI = Nucleoside reverse transcriptase inhibitor; SIDS = Sudden Infant Death Syndrome; sCJD = Sporadic Creutzfeldt-Jakob disease; CPEO = Chronic progressive external ophthalmoplegia; CM = Cardiomyopathy; MDD = Major depressive disorder; POAG = Primary open angle glaucoma; L IMM = Lethal infantile mitochondrial myopathy; MS = Multiple sclerosis;

**Table S27.** Affymetrix Axiom UKBiobank

| ID           | Gene       | Variant | Type of Variant | Amino Acid | Base Substitution Associated Phenotypes*          | Somatic Variant Associated Phenotypes*                                           | PolyPhen-2 Prediction |
|--------------|------------|---------|-----------------|------------|---------------------------------------------------|----------------------------------------------------------------------------------|-----------------------|
| 7950464<br>4 | Non-coding | A73G    |                 |            |                                                   | Aging brains; POLG/PEO & control muscle; Buccal cell, thyroid, & prostate tumors |                       |
| 8902567<br>2 | Non-coding | G143A   |                 |            |                                                   |                                                                                  |                       |
| 5232152<br>5 | Non-coding | C150T   |                 |            | Longevity; Cervical carcinoma; HPV infection risk | Elderly fibroblasts & leukocytes; Lung, thyroid, & prostate tumors               |                       |
| 5232159<br>2 | Non-coding | G228A   |                 |            |                                                   |                                                                                  |                       |
| 3446193<br>9 | Non-coding | A235G   |                 |            |                                                   | Prostate Tumor                                                                   |                       |
| 3446195<br>7 | Non-coding | A263G   |                 |            |                                                   | POLG/MNGIE muscle                                                                |                       |
| 9204786<br>9 | Non-coding | C295T   |                 |            |                                                   | POLG/MNGIE muscle; Glioblastoma                                                  |                       |

| ID       | Gene            | Variant | Type of Variant | Amino Acid | Base Substitution Associated Phenotypes* | Somatic Variant Associated Phenotypes* | PolyPhen-2 Prediction |
|----------|-----------------|---------|-----------------|------------|------------------------------------------|----------------------------------------|-----------------------|
| 89025756 | Non-coding      | C462T   |                 |            |                                          | Thyroid tumor                          |                       |
| 79381655 | Non-coding      | T489C   |                 |            |                                          | Ovarian carcinoma;<br>Prostate tumor   |                       |
| 89025674 | Non-coding      | C497T   |                 |            |                                          | Thyroid tumor                          |                       |
| 89025725 | Non-coding      | A547T   |                 |            |                                          |                                        |                       |
| 34462196 | <i>12S rRNA</i> | G709A   |                 |            |                                          |                                        |                       |
| 79381656 | <i>12S rRNA</i> | A750G   |                 |            |                                          |                                        |                       |
| 34462230 | <i>12S rRNA</i> | G769A   |                 |            |                                          |                                        |                       |
| 89025774 | <i>12S rRNA</i> | A827G   |                 |            | DEAF; B4b'd marker                       |                                        |                       |
| 91439597 | <i>12S rRNA</i> | T961G   |                 |            | Possibly DEAF-associated                 |                                        |                       |
| 89025767 | <i>12S rRNA</i> | T961C   |                 |            | DEAF; Possibly LVNC-associated           |                                        |                       |
| 91439598 | <i>12S rRNA</i> | T980C   |                 |            |                                          |                                        |                       |
| 89025772 | <i>12S rRNA</i> | G1018A  |                 |            |                                          |                                        |                       |
| 34461684 | <i>12S rRNA</i> | T1243C  |                 |            |                                          | Pancreatic cancer cell line            |                       |
| 89025736 | <i>12S rRNA</i> | T1391C  |                 |            | Found in 1 HCM patient                   |                                        |                       |
| 89025696 | <i>12S rRNA</i> | T1406C  |                 |            |                                          | Pancreatic cancer cell line            |                       |

| ID       | Gene            | Variant | Type of Variant | Amino Acid | Base Substitution Associated Phenotypes*     | Somatic Variant Associated Phenotypes*                    | PolyPhen-2 Prediction |
|----------|-----------------|---------|-----------------|------------|----------------------------------------------|-----------------------------------------------------------|-----------------------|
| 34461788 | <i>12S rRNA</i> | A1438G  |                 |            | SZ-associated                                |                                                           |                       |
| 89025706 | <i>12S rRNA</i> | A1555G  |                 |            | DEAF                                         |                                                           |                       |
| 79381658 | <i>16S rRNA</i> | G1719A  |                 |            |                                              |                                                           |                       |
| 79443409 | <i>16S rRNA</i> | C1721T  |                 |            |                                              | Acute leukemia<br>platelets, leukocytes,<br>& bone marrow |                       |
| 79381659 | <i>16S rRNA</i> | A1736G  |                 |            |                                              |                                                           |                       |
| 34461927 | <i>16S rRNA</i> | T2158C  |                 |            |                                              |                                                           |                       |
| 89025695 | <i>16S rRNA</i> | C2218T  |                 |            |                                              |                                                           |                       |
| 34461942 | <i>16S rRNA</i> | T2416C  |                 |            |                                              |                                                           |                       |
| 34461948 | <i>16S rRNA</i> | T2483C  |                 |            |                                              |                                                           |                       |
| 34461959 | <i>16S rRNA</i> | A2706G  |                 |            |                                              |                                                           |                       |
| 34461963 | <i>16S rRNA</i> | G2758A  |                 |            |                                              |                                                           |                       |
| 92047843 | <i>16S rRNA</i> | C2789T  |                 |            |                                              |                                                           |                       |
| 34461972 | <i>16S rRNA</i> | T2885C  |                 |            |                                              |                                                           |                       |
| 34461976 | <i>16S rRNA</i> | G3010A  |                 |            | Cyclic vomiting<br>syndrome with<br>migraine |                                                           |                       |



| ID       | Gene             | Variant | Type of Variant | Amino Acid | Base Substitution Associated Phenotypes*                                            | Somatic Variant Associated Phenotypes*              | PolyPhen-2 Prediction |
|----------|------------------|---------|-----------------|------------|-------------------------------------------------------------------------------------|-----------------------------------------------------|-----------------------|
| 79443412 | <i>16S rRNA</i>  | T3027C  |                 |            |                                                                                     |                                                     |                       |
| 79381660 | <i>16S rRNA</i>  | T3197C  |                 |            |                                                                                     |                                                     |                       |
| 89025759 | <i>tRNA-Leu1</i> | A3243G  |                 |            | MELAS; LS; DMDF; MIDD; SNHL; CPEO; MM: FSGS; ASD; Cardiac & multi-organ dysfunction | Elderly brain & muscle; Colon tumor; Oncocytoma     |                       |
| 89025737 | <i>ND1</i>       | T3308G  | Nonsynonymous   | M1Term     | SIDS                                                                                |                                                     |                       |
| 89025707 | <i>ND1</i>       | G3316A  | Nonsynonymous   | A4T        | Diabetes; LHON; PEO                                                                 |                                                     | Benign                |
| 34461994 | <i>ND1</i>       | A3348G  | Synonymous      | L14L       |                                                                                     |                                                     |                       |
| 34461996 | <i>ND1</i>       | T3394C  | Nonsynonymous   | Y30H       | LHON; Diabetes; CPT deficiency; High altitude adaptation                            | Acute leukemia platelets, leukocytes, & bone marrow | Benign                |
| 89025777 | <i>ND1</i>       | A3395G  | Nonsynonymous   | Y30C       | HCM with hearing loss                                                               |                                                     | Benign                |
| 89025735 | <i>ND1</i>       | A3397G  | Nonsynonymous   | M31V       | AD; PD; Possibly LVNC-cardiomyopathy associated                                     |                                                     | Benign                |
| 89025688 | <i>ND1</i>       | T3398C  | Nonsynonymous   | M31T       | DMDF + HCM; GDM; Possibly LVNC-cardiomyopathy associated                            |                                                     | Benign                |
| 89025676 | <i>ND1</i>       | T3423G  | Synonymous      | V39V       |                                                                                     |                                                     |                       |
| 89025722 | <i>ND1</i>       | G3460A  | Nonsynonymous   | A52T       | LHON                                                                                |                                                     | Probably damaging     |

| ID           | Gene       | Variant | Type of Variant | Amino Acid | Base Substitution Associated Phenotypes* | Somatic Variant Associated Phenotypes* | PolyPhen-2 Prediction |
|--------------|------------|---------|-----------------|------------|------------------------------------------|----------------------------------------|-----------------------|
| 7938166<br>1 | <i>ND1</i> | A3480G  | Synonymous      | K58K       |                                          | Prostate Tumor                         |                       |
| 8902571<br>8 | <i>ND1</i> | G3531A  | Synonymous      | P75P       |                                          |                                        |                       |
| 9204784<br>4 | <i>ND1</i> | G3591A  | Synonymous      | L95L       |                                          |                                        |                       |
| 8902574<br>1 | <i>ND1</i> | C3594T  | Synonymous      | V96V       |                                          | Thyroid tumor                          |                       |
| 7944341<br>9 | <i>ND1</i> | T3645C  | Synonymous      | V113V      |                                          |                                        |                       |
| 7938166<br>2 | <i>ND1</i> | G3666A  | Synonymous      | G120G      |                                          |                                        |                       |
| 8902571<br>0 | <i>ND1</i> | G3697A  | Nonsynonymous   | G131S      | MELAS; LS; LDYT                          |                                        | Probably damaging     |
| 7938166<br>3 | <i>ND1</i> | A3720G  | Synonymous      | Q138Q      |                                          |                                        |                       |
| 8902578<br>1 | <i>ND1</i> | G3733A  | Nonsynonymous   | E143K      | LHON                                     |                                        | Possibly damaging     |
| 8902576<br>2 | <i>ND1</i> | G3736A  | Nonsynonymous   | V144I      | LHON                                     |                                        | Benign                |
| 8902573<br>9 | <i>ND1</i> | A3796G  | Nonsynonymous   | T164A      | Adult onset dystonia                     |                                        | Benign                |
| 9204784<br>5 | <i>ND1</i> | G3834A  | Synonymous      | L176L      |                                          |                                        |                       |
| 8902568<br>2 | <i>ND1</i> | T3866C  | Nonsynonymous   | I187T      | LHON & limb claudication                 |                                        | Benign                |
| 7938166<br>4 | <i>ND1</i> | G3915A  | Synonymous      | G203G      |                                          |                                        |                       |
| 7938166<br>5 | <i>ND1</i> | G3918A  | Synonymous      | E204E      |                                          | Breast tumor                           |                       |

| ID       | Gene            | Variant | Type of Variant | Amino Acid | Base Substitution Associated Phenotypes*                          | Somatic Variant Associated Phenotypes*              | PolyPhen-2 Prediction |
|----------|-----------------|---------|-----------------|------------|-------------------------------------------------------------------|-----------------------------------------------------|-----------------------|
| 92047846 | <i>ND1</i>      | C3936T  | Synonymous      | G210G      |                                                                   |                                                     |                       |
| 89025738 | <i>ND1</i>      | G3946A  | Nonsynonymous   | E214K      | MELAS                                                             |                                                     | Probably damaging     |
| 89025729 | <i>ND1</i>      | T3949C  | Nonsynonymous   | Y215H      | MELAS                                                             | Thyroid oncocyoma                                   | Probably damaging     |
| 79381666 | <i>ND1</i>      | C3970T  | Synonymous      | L222L      |                                                                   |                                                     |                       |
| 92047847 | <i>ND1</i>      | C3990T  | Synonymous      | Y228Y      |                                                                   |                                                     |                       |
| 79381667 | <i>ND1</i>      | C3992T  | Nonsynonymous   | T229M      |                                                                   | Thyroid tumor                                       | Benign                |
| 34462030 | <i>ND1</i>      | A4024G  | Nonsynonymous   | T240A      |                                                                   |                                                     | Benign                |
| 89025770 | <i>ND1</i>      | A4093G  | Nonsynonymous   | T263A      |                                                                   |                                                     | Benign                |
| 89025723 | <i>ND1</i>      | A4104G  | Synonymous      | L266L      |                                                                   |                                                     |                       |
| 89025755 | <i>ND1</i>      | T4160C  | Nonsynonymous   | L285P      | LHON                                                              |                                                     | Probably damaging     |
| 89025668 | <i>ND1</i>      | C4171A  | Nonsynonymous   | L289M      | LHON                                                              |                                                     | Probably damaging     |
| 89025684 | <i>ND1</i>      | T4216C  | Nonsynonymous   | Y304H      | LHON; Insulin resistance; Possible adaptive high altitude variant | Acute leukemia platelets, leukocytes, & bone marrow | Benign                |
| 89025714 | <i>tRNA-Ile</i> | A4300G  |                 |            | MICM                                                              |                                                     |                       |
| 92047848 | <i>tRNA-Ile</i> | A4310G  |                 |            |                                                                   |                                                     |                       |

| ID       | Gene            | Variant | Type of Variant | Amino Acid | Base Substitution Associated Phenotypes*                    | Somatic Variant Associated Phenotypes* | PolyPhen-2 Prediction |
|----------|-----------------|---------|-----------------|------------|-------------------------------------------------------------|----------------------------------------|-----------------------|
| 79381668 | <i>tRNA-Gln</i> | T4336C  |                 |            | AD; PD; Hearing loss & migraine                             |                                        |                       |
| 92047849 | <i>ND2</i>      | A4529T  | Synonymous      | T20T       |                                                             |                                        |                       |
| 34462060 | <i>ND2</i>      | T4561C  | Nonsynonymous   | V31A       |                                                             |                                        | Benign                |
| 34462062 | <i>ND2</i>      | G4580A  | Synonymous      | M37M       |                                                             | Pancreatic cancer cell line            |                       |
| 89025699 | <i>ND2</i>      | T4639C  | Nonsynonymous   | I57T       |                                                             |                                        | Benign                |
| 89025744 | <i>ND2</i>      | A4715G  | Synonymous      | G82G       |                                                             |                                        |                       |
| 34462075 | <i>ND2</i>      | A4769G  | Synonymous      | M100M      |                                                             |                                        |                       |
| 89025751 | <i>ND2</i>      | A4793G  | Synonymous      | M108M      |                                                             |                                        |                       |
| 79381669 | <i>ND2</i>      | G4820A  | Synonymous      | E117E      |                                                             |                                        |                       |
| 79381670 | <i>ND2</i>      | A4824G  | Nonsynonymous   | T119A      |                                                             |                                        | Possibly damaging     |
| 34462083 | <i>ND2</i>      | C4883T  | Synonymous      | P138P      | Glaucoma                                                    |                                        |                       |
| 79381671 | <i>ND2</i>      | A4917G  | Nonsynonymous   | N150D      | LHON; Insulin resistance; AMD; NRTI-PN; Haplogroup T marker |                                        | Benign                |
| 34462088 | <i>ND2</i>      | T4977C  | Synonymous      | L170L      |                                                             |                                        |                       |
| 79381672 | <i>ND2</i>      | T5004C  | Synonymous      | L179L      |                                                             |                                        |                       |

| ID       | Gene            | Variant | Type of Variant | Amino Acid | Base Substitution Associated Phenotypes*                                                        | Somatic Variant Associated Phenotypes* | PolyPhen-2 Prediction |
|----------|-----------------|---------|-----------------|------------|-------------------------------------------------------------------------------------------------|----------------------------------------|-----------------------|
| 34462094 | ND2             | G5046A  | Nonsynonymous   | V193I      |                                                                                                 |                                        | Benign                |
| 89025778 | ND2             | G5147A  | Synonymous      | T226T      |                                                                                                 |                                        |                       |
| 89025691 | ND2             | C5178A  | Nonsynonymous   | L237M      | Longevity; Extraversion<br>MI; AMS protection;<br>Blood iron metabolism;<br>Haplogroup D marker |                                        | Probably damaging     |
| 89025748 | ND2             | G5231A  | Synonymous      | L254L      |                                                                                                 | Endometrial control tissue             |                       |
| 34462105 | ND2             | C5263T  | Nonsynonymous   | A265V      |                                                                                                 |                                        | Benign                |
| 92047850 | ND2             | C5360T  | Synonymous      | I297I      |                                                                                                 |                                        |                       |
| 79381673 | ND2             | A5390G  | Synonymous      | M307M      |                                                                                                 |                                        |                       |
| 79381674 | ND2             | T5442C  | Nonsynonymous   | F325L      |                                                                                                 |                                        | Benign                |
| 79381676 | ND2             | T5495C  | Synonymous      | F342F      |                                                                                                 |                                        |                       |
| 89025677 | <i>tRNA-Ala</i> | C5633T  |                 |            |                                                                                                 | Thyroid tumor                          |                       |
| 34462122 | Non-coding      | A5656G  |                 |            |                                                                                                 |                                        |                       |
| 79381677 | <i>tRNA-Cys</i> | G5773A  |                 |            |                                                                                                 |                                        |                       |
| 89025680 | COX1            | G5913A  | Nonsynonymous   | D4N        | Prostate cancer;<br>Hypertension                                                                |                                        | Benign                |
| 34462135 | COX1            | A5951G  | Synonymous      | G16G       |                                                                                                 |                                        |                       |

| ID       | Gene | Variant | Type of Variant | Amino Acid | Base Substitution Associated Phenotypes* | Somatic Variant Associated Phenotypes*    | PolyPhen-2 Prediction |
|----------|------|---------|-----------------|------------|------------------------------------------|-------------------------------------------|-----------------------|
| 79443437 | COX1 | T5999C  | Synonymous      | A32A       |                                          | Pancreatic cancer cell line; Glioblastoma |                       |
| 79443438 | COX1 | A6047G  | Synonymous      | L48L       |                                          | Pancreatic cancer cell line; Glioblastoma |                       |
| 89025671 | COX1 | T6185C  | Synonymous      | F94F       |                                          |                                           |                       |
| 79381678 | COX1 | T6221C  | Synonymous      | P106P      |                                          |                                           |                       |
| 92047851 | COX1 | T6253C  | Nonsynonymous   | M117T      | Prostate cancer; Enriched in POAG cohort |                                           | Benign                |
| 89025742 | COX1 | C6371T  | Synonymous      | S156S      |                                          |                                           |                       |
| 92047870 | COX1 | C6386T  | Synonymous      | A161A      |                                          |                                           |                       |
| 86887358 | COX1 | C6455T  | Synonymous      | F184F      |                                          |                                           |                       |
| 89025708 | COX1 | C6528T  | Synonymous      | L209L      |                                          |                                           |                       |
| 89025724 | COX1 | T6671C  | Synonymous      | H256H      |                                          |                                           |                       |
| 34462179 | COX1 | G6734A  | Synonymous      | M277M      |                                          |                                           |                       |
| 34462180 | COX1 | A6752G  | Synonymous      | L283L      |                                          |                                           |                       |
| 34462182 | COX1 | T6776C  | Synonymous      | H291H      |                                          | Breast cystic masses                      |                       |
| 34462190 | COX1 | C7028T  | Synonymous      | A375A      |                                          |                                           |                       |
| 34462191 | COX1 | A7055G  | Synonymous      | G384G      |                                          | MNGIE fibroblasts                         |                       |

| ID       | Gene     | Variant | Type of Variant      | Amino Acid  | Base Substitution Associated Phenotypes*                             | Somatic Variant Associated Phenotypes* | PolyPhen-2 Prediction |
|----------|----------|---------|----------------------|-------------|----------------------------------------------------------------------|----------------------------------------|-----------------------|
| 89025666 | COX1     | T7094C  | Synonymous           | F397F       |                                                                      |                                        |                       |
| 34462202 | COX1     | T7175C  | Synonymous           | T424T       |                                                                      |                                        |                       |
| 92047852 | COX1     | C7276T  | Nonsynonymous        | S458L       |                                                                      |                                        | Probably damaging     |
| 89025764 | COX1     | G7444A  | Premature Stop Codon | Term514K    | LHON; SNHL; DEAF                                                     |                                        |                       |
| 79443447 | tRNA-Ser | C7476T  |                      |             |                                                                      | Thyroid hyperplasia                    |                       |
| 92047871 | COX2     | T7645C  | Synonymous           | L20L        |                                                                      |                                        |                       |
| 89025775 | COX2     | T7657C  | Synonymous           | H24H        |                                                                      |                                        |                       |
| 79381679 | COX2     | A7768G  | Synonymous           | M61M        |                                                                      |                                        |                       |
| 89025692 | COX2     | C7864T  | Synonymous           | P93P        |                                                                      |                                        |                       |
| 89025766 | COX2     | G8269A  | Synonymous           | Term228Term |                                                                      |                                        |                       |
| 89025704 | tRNA-Lys | A8344G  |                      |             | MERRF; Other-LD; Depressive mood disorder; Leukoencephalopathy; HiCM | Bone marrow; Elderly muscle            |                       |
| 92047859 | ATP8     | T8448C  | Nonsynonymous        | M28T        |                                                                      |                                        | Benign                |
| 79381680 | ATP6     | G8616T  | Nonsynonymous        | L30F        |                                                                      |                                        | Probably damaging     |
| 92047860 | ATP6     | C8655T  | Synonymous           | I43I        |                                                                      |                                        |                       |

| ID       | Gene | Variant | Type of Variant | Amino Acid | Base Substitution Associated Phenotypes* | Somatic Variant Associated Phenotypes* | PolyPhen-2 Prediction |
|----------|------|---------|-----------------|------------|------------------------------------------|----------------------------------------|-----------------------|
| 89025689 | ATP6 | C8684T  | Nonsynonymous   | T53I       |                                          |                                        | Benign                |
| 89025732 | ATP6 | G8697A  | Synonymous      | M57M       |                                          | Thyroid tumor                          |                       |
| 34462282 | ATP6 | A8869G  | Nonsynonymous   | M115V      |                                          |                                        | Benign                |
| 89025719 | ATP6 | T8993G  | Nonsynonymous   | L156R      | NARP; Leigh Disease; MILS                |                                        | Probably damaging     |
| 89025749 | ATP6 | G8994A  | Synonymous      | L156L      |                                          |                                        |                       |
| 34462293 | ATP6 | C9042T  | Synonymous      | H172H      |                                          |                                        |                       |
| 89025757 | ATP6 | G9053A  | Nonsynonymous   | S176N      |                                          |                                        | Benign                |
| 89025685 | ATP6 | G9055A  | Nonsynonymous   | A177T      | PD protective factor                     |                                        | Possibly damaging     |
| 34462296 | ATP6 | A9072G  | Synonymous      | S182S      |                                          |                                        |                       |
| 89025769 | ATP6 | T9090C  | Synonymous      | S188S      |                                          |                                        |                       |
| 34462299 | ATP6 | A9093G  | Synonymous      | T189T      |                                          |                                        |                       |
| 92047864 | ATP6 | G9123A  | Synonymous      | L199L      |                                          |                                        |                       |
| 89025773 | COX3 | A9221G  | Synonymous      | S5S        |                                          |                                        |                       |
| 79381681 | COX3 | A9377G  | Synonymous      | W57W       |                                          |                                        |                       |
| 89025758 | COX3 | T9647C  | Synonymous      | A147A      |                                          |                                        |                       |



| ID       | Gene            | Variant | Type of Variant | Amino Acid | Base Substitution Associated Phenotypes*                    | Somatic Variant Associated Phenotypes* | PolyPhen-2 Prediction |
|----------|-----------------|---------|-----------------|------------|-------------------------------------------------------------|----------------------------------------|-----------------------|
| 79381683 | COX3            | A9667G  | Nonsynonymous   | N154S      |                                                             |                                        | Benign                |
| 79381684 | COX3            | T9698C  | Synonymous      | L164L      |                                                             |                                        |                       |
| 34462338 | COX3            | T9716C  | Synonymous      | G170G      |                                                             |                                        |                       |
| 79381685 | COX3            | T9899C  | Synonymous      | H231H      |                                                             |                                        |                       |
| 79381686 | COX3            | T9950C  | Synonymous      | V248V      |                                                             |                                        |                       |
| 34461569 | <i>tRNA-Gly</i> | T10034C |                 |            |                                                             |                                        |                       |
| 34461570 | <i>tRNA-Gly</i> | A10044G |                 |            | SIDS                                                        |                                        |                       |
| 89025697 | ND3             | T10084C | Nonsynonymous   | I9T        |                                                             |                                        | Benign                |
| 92047861 | ND3             | C10142T | Synonymous      | N28N       |                                                             |                                        |                       |
| 92047862 | ND3             | A10217G | Synonymous      | M53M       |                                                             |                                        |                       |
| 79381687 | ND3             | T10238C | Synonymous      | I60I       |                                                             |                                        |                       |
| 79381688 | ND3             | G10310A | Synonymous      | L84L       |                                                             |                                        |                       |
| 79381689 | ND3             | T10321C | Nonsynonymous   | V88A       |                                                             | Bladder tumor                          | Benign                |
| 92047863 | ND3             | C10394T | Synonymous      | D112D      |                                                             |                                        |                       |
| 79381690 | ND3             | A10398G | Nonsynonymous   | T114A      | PD protective factor; Longevity; Altered cell pH; Metabolic | Thyroid tumor                          | Benign                |

| ID       | Gene            | Variant | Type of Variant | Amino Acid | Base Substitution Associated Phenotypes*<br>syndrome; Breast cancer risk; Haplogroup IJK marker | Somatic Variant Associated Phenotypes* | PolyPhen-2 Prediction |
|----------|-----------------|---------|-----------------|------------|-------------------------------------------------------------------------------------------------|----------------------------------------|-----------------------|
| 89025669 | <i>ND3</i>      | C10400T | Synonymous      | T114T      |                                                                                                 |                                        |                       |
| 79381691 | <i>tRNA-Arg</i> | T10463C |                 |            |                                                                                                 | Endometrial tumor                      |                       |
| 34461593 | <i>ND4L</i>     | A10550G | Synonymous      | M27M       |                                                                                                 | Endometrial control tissue             |                       |
| 34461595 | <i>ND4L</i>     | G10586A | Synonymous      | S39S       |                                                                                                 |                                        |                       |
| 79381692 | <i>ND4L</i>     | G10589A | Synonymous      | L40L       |                                                                                                 |                                        |                       |
| 34461600 | <i>ND4L</i>     | G10688A | Synonymous      | V73V       |                                                                                                 |                                        |                       |
| 86886451 | <i>ND4</i>      | T10810C | Synonymous      | L17L       |                                                                                                 |                                        |                       |
| 89025678 | <i>ND4</i>      | A10819G | Synonymous      | K20K       |                                                                                                 |                                        |                       |
| 79381693 | <i>ND4</i>      | T10873C | Synonymous      | P38P       |                                                                                                 |                                        |                       |
| 79381694 | <i>ND4</i>      | T10915C | Synonymous      | C52C       |                                                                                                 |                                        |                       |
| 89025768 | <i>ND4</i>      | T11025C | Nonsynonymous   | L89P       |                                                                                                 |                                        | Benign                |
| 34461623 | <i>ND4</i>      | A11251G | Synonymous      | L164L      |                                                                                                 |                                        |                       |
| 89025753 | <i>ND4</i>      | T11299C | Synonymous      | T180T      |                                                                                                 |                                        |                       |
| 92047873 | <i>ND4</i>      | C11332T | Synonymous      | A191A      |                                                                                                 | Thyroid tumor                          |                       |

| ID       | Gene | Variant | Type of Variant | Amino Acid | Base Substitution Associated Phenotypes* | Somatic Variant Associated Phenotypes*      | PolyPhen-2 Prediction |
|----------|------|---------|-----------------|------------|------------------------------------------|---------------------------------------------|-----------------------|
| 79381695 | ND4  | G11377A | Synonymous      | K206K      |                                          |                                             |                       |
| 79381696 | ND4  | A11467G | Synonymous      | L236L      | Altered brain pH; sCJD patients          | Pancreatic cancer cell line; Prostate tumor |                       |
| 89025715 | ND4  | C11674T | Synonymous      | T305T      |                                          |                                             |                       |
| 89025779 | ND4  | G11778A | Nonsynonymous   | R340H      | LHON; Progressive dystonia               |                                             | Probably damaging     |
| 34461648 | ND4  | A11812G | Synonymous      | L351L      |                                          |                                             |                       |
| 79381697 | ND4  | T11899C | Synonymous      | S380S      |                                          |                                             |                       |
| 34461653 | ND4  | G11914A | Synonymous      | T385T      |                                          |                                             |                       |
| 92047855 | ND4  | A11947G | Synonymous      | T396T      |                                          | Prostate tumor                              |                       |
| 34461680 | ND5  | G12372A | Synonymous      | L12L       | Altered brain pH; sCJD patients          | Prostate tumor                              |                       |
| 89025681 | ND5  | A12397G | Nonsynonymous   | T21A       |                                          |                                             | Early onset PD        |
| 89025686 | ND5  | G12406A | Nonsynonymous   | V24I       |                                          |                                             | Benign                |
| 86886472 | ND5  | G12501A | Synonymous      | M55M       |                                          |                                             |                       |
| 34461691 | ND5  | A12612G | Synonymous      | V92V       |                                          |                                             |                       |
| 79381699 | ND5  | G12630A | Synonymous      | W98W       |                                          |                                             |                       |
| 89025731 | ND5  | C12633A | Synonymous      | S99S       |                                          |                                             |                       |

| ID       | Gene | Variant | Type of Variant | Amino Acid | Base Substitution Associated Phenotypes* | Somatic Variant Associated Phenotypes* | PolyPhen-2 Prediction |
|----------|------|---------|-----------------|------------|------------------------------------------|----------------------------------------|-----------------------|
| 34461695 | ND5  | C12669T | Synonymous      | D111D      |                                          |                                        |                       |
| 79381700 | ND5  | C12705T | Synonymous      | I123I      |                                          | Prostate tumor                         |                       |
| 89025760 | ND5  | A12810G | Synonymous      | W158W      |                                          |                                        |                       |
| 79381701 | ND5  | A12850G | Nonsynonymous   | I172V      |                                          |                                        | Possibly damaging     |
| 89025712 | ND5  | T12879C | Synonymous      | G181G      |                                          |                                        |                       |
| 89025701 | ND5  | A12950G | Nonsynonymous   | N205S      |                                          |                                        | Benign                |
| 92047856 | ND5  | T13020C | Synonymous      | G228G      |                                          |                                        |                       |
| 92047857 | ND5  | A13101C | Synonymous      | A255A      |                                          |                                        |                       |
| 52321475 | ND5  | A13104G | Synonymous      | G256G      |                                          |                                        |                       |
| 34461715 | ND5  | A13105G | Nonsynonymous   | I257V      |                                          |                                        | Benign                |
| 89025747 | ND5  | A13117G | Nonsynonymous   | I261V      |                                          |                                        | Possibly damaging     |
| 79381702 | ND5  | A13263G | Synonymous      | Q309Q      |                                          |                                        |                       |
| 89025728 | ND5  | T13500C | Synonymous      | G388G      |                                          | Pancreatic cancer cell line            |                       |
| 89025716 | ND5  | C13506T | Synonymous      | Y390Y      |                                          |                                        |                       |
| 89025711 | ND5  | T13617C | Synonymous      | I427I      |                                          |                                        |                       |

| ID       | Gene | Variant | Type of Variant | Amino Acid | Base Substitution Associated Phenotypes*                                 | Somatic Variant Associated Phenotypes*                            | PolyPhen-2 Prediction |
|----------|------|---------|-----------------|------------|--------------------------------------------------------------------------|-------------------------------------------------------------------|-----------------------|
| 79381703 | ND5  | C13650T | Synonymous      | P438P      |                                                                          |                                                                   |                       |
| 34461745 | ND5  | G13708A | Nonsynonymous   | A458T      | LHON; Increased MS risk; Higher frequency in PD-ADS; Haplogroup J marker | Acute leukemia platelets, leukocytes, & bone marrow; Breast tumor | Benign                |
| 79443499 | ND5  | G13759A | Nonsynonymous   | A475T      |                                                                          |                                                                   | Benign                |
| 79381704 | ND5  | A13780G | Nonsynonymous   | I482V      |                                                                          |                                                                   | Benign                |
| 34461750 | ND5  | T13789C | Nonsynonymous   | Y485H      |                                                                          |                                                                   | Probably damaging     |
| 89025700 | ND5  | T13879C | Nonsynonymous   | S515P      |                                                                          | MNGIE fibroblasts                                                 | Benign                |
| 79381705 | ND5  | T13965C | Synonymous      | L543L      |                                                                          |                                                                   |                       |
| 34461763 | ND5  | A13966G | Nonsynonymous   | T544A      |                                                                          |                                                                   | Benign                |
| 89025754 | ND5  | G14016A | Synonymous      | K560K      |                                                                          |                                                                   |                       |
| 92047858 | ND5  | A14070G | Synonymous      | S578S      |                                                                          |                                                                   |                       |
| 92047868 | ND5  | T14094C | Synonymous      | L586L      |                                                                          |                                                                   |                       |
| 79443502 | ND5  | A14133G | Synonymous      | L599L      |                                                                          |                                                                   |                       |
| 92047853 | ND5  | A14139G | Synonymous      | L601L      |                                                                          |                                                                   |                       |
| 89025746 | ND6  | C14167T | Synonymous      | E169E      |                                                                          |                                                                   |                       |

| ID       | Gene            | Variant | Type of Variant | Amino Acid | Base Substitution Associated Phenotypes* | Somatic Variant Associated Phenotypes* | PolyPhen-2 Prediction |
|----------|-----------------|---------|-----------------|------------|------------------------------------------|----------------------------------------|-----------------------|
| 79381706 | ND6             | T14178C | Nonsynonymous   | I166V      |                                          |                                        | Benign                |
| 86496743 | ND6             | T14318C | Nonsynonymous   | N119S      |                                          |                                        | Benign                |
| 92047854 | ND6             | T14470A | Synonymous      | G68G       |                                          |                                        |                       |
| 89025717 | ND6             | T14484C | Nonsynonymous   | M64V       | LHON                                     |                                        | Probably damaging     |
| 89025780 | ND6             | T14550C | Nonsynonymous   | I42V       |                                          |                                        | Benign                |
| 92047872 | ND6             | A14552G | Nonsynonymous   | V41A       |                                          | Pancreatic cancer cell line            | Benign                |
| 79381708 | ND6             | A14582G | Nonsynonymous   | V31A       |                                          |                                        | Benign                |
| 92047865 | ND6             | C14620T | Synonymous      | G18G       |                                          | Glioblastoma                           |                       |
| 89025675 | <i>tRNA-Glu</i> | T14674C |                 |            | Reversible COX deficiency myopathy       |                                        |                       |
| 34461803 | CYB             | T14798C | Nonsynonymous   | F18L       |                                          | Glioblastoma                           | Benign                |
| 92047866 | CYB             | G14869A | Synonymous      | L41L       |                                          | Breast tumor                           |                       |
| 79443511 | CYB             | C14872T | Synonymous      | I42I       |                                          |                                        |                       |
| 34461806 | CYB             | G14905A | Synonymous      | M53M       |                                          |                                        |                       |
| 79381709 | CYB             | G15043A | Synonymous      | G99G       | MDD-associated                           |                                        |                       |
| 92047867 | CYB             | G15148A | Synonymous      | P134P      |                                          |                                        |                       |

| ID       | Gene | Variant | Type of Variant | Amino Acid | Base Substitution Associated Phenotypes* | Somatic Variant Associated Phenotypes*    | PolyPhen-2 Prediction |
|----------|------|---------|-----------------|------------|------------------------------------------|-------------------------------------------|-----------------------|
| 89025745 | CYB  | A15218G | Nonsynonymous   | T158A      |                                          |                                           | Possibly damaging     |
| 89025761 | CYB  | A15244G | Synonymous      | G166G      |                                          |                                           |                       |
| 89025726 | CYB  | C15250T | Synonymous      | Y168Y      |                                          |                                           |                       |
| 79381710 | CYB  | G15257A | Nonsynonymous   | D171N      | LHON; Haplogroup J2 marker               |                                           | Benign                |
| 79381711 | CYB  | G15301A | Synonymous      | L185L      |                                          | Tumor                                     |                       |
| 34461828 | CYB  | C15452A | Nonsynonymous   | L236I      |                                          |                                           | Benign                |
| 92047874 | CYB  | T15454C | Synonymous      | L236L      |                                          |                                           |                       |
| 34461832 | CYB  | C15535T | Synonymous      | N263N      |                                          |                                           |                       |
| 79381712 | CYB  | T15670C | Synonymous      | H308H      |                                          | Breast tumor                              |                       |
| 89025690 | CYB  | T15693C | Nonsynonymous   | M316T      | Possibly LVNC cardiomyopathy-associated  | Breast tumor                              | Benign                |
| 34461837 | CYB  | A15758G | Nonsynonymous   | I338V      |                                          |                                           | Benign                |
| 79381713 | CYB  | T15784C | Synonymous      | P346P      | POAG- potential for association          | Pancreatic cancer cell line; Breast tumor |                       |
| 89025698 | CYB  | G15812A | Nonsynonymous   | V356M      | LHON                                     |                                           | Benign                |
| 79381714 | CYB  | C15833T | Synonymous      | L363L      |                                          |                                           |                       |
| 89025667 | CYB  | G15884A | Nonsynonymous   | A380T      |                                          |                                           | Benign                |

| ID           | Gene            | Variant | Type of Variant | Amino Acid | Base Substitution Associated Phenotypes*         | Somatic Variant Associated Phenotypes*   | PolyPhen-2 Prediction |
|--------------|-----------------|---------|-----------------|------------|--------------------------------------------------|------------------------------------------|-----------------------|
| 5232155<br>6 | <i>tRNA-Thr</i> | C15904T |                 |            |                                                  |                                          |                       |
| 7938171<br>5 | <i>tRNA-Thr</i> | A15924G |                 |            | LIMM                                             |                                          |                       |
| 7938171<br>6 | <i>tRNA-Thr</i> | G15928A |                 |            | MS; Idiopathic repeat miscarriage; AD protection |                                          |                       |
| 7938171<br>7 | <i>tRNA-Thr</i> | G15930A |                 |            |                                                  |                                          |                       |
| 8902569<br>4 | <i>tRNA-Thr</i> | C15946T |                 |            |                                                  |                                          |                       |
| 9204787<br>5 | Non-coding      | A15954C |                 |            |                                                  |                                          |                       |
| 8902570<br>5 | Non-coding      | A15954G |                 |            |                                                  |                                          |                       |
| 7944351<br>9 | Non-coding      | A16051G |                 |            |                                                  |                                          |                       |
| 8902575<br>0 | Non-coding      | A16126C |                 |            |                                                  |                                          |                       |
| 7938171<br>9 | Non-coding      | T16144C |                 |            |                                                  |                                          |                       |
| 7938172<br>0 | Non-coding      | G16145A |                 |            |                                                  |                                          |                       |
| 7938172<br>1 | Non-coding      | C16148T |                 |            |                                                  | Aging brains                             |                       |
| 3446186<br>2 | Non-coding      | G16153A |                 |            |                                                  |                                          |                       |
| 9204787<br>6 | Non-coding      | A16183C |                 |            | Melanoma patients                                | Lung tumor back-mutation; Prostate tumor |                       |



| ID       | Gene       | Variant | Type of Variant | Amino Acid | Base Substitution Associated Phenotypes* | Somatic Variant Associated Phenotypes* | PolyPhen-2 Prediction |
|----------|------------|---------|-----------------|------------|------------------------------------------|----------------------------------------|-----------------------|
| 89025703 | Non-coding | C16193T |                 |            |                                          | Ovarian tumor                          |                       |
| 89025720 | Non-coding | T16243C |                 |            |                                          |                                        |                       |
| 79443524 | Non-coding | C16261T |                 |            |                                          |                                        |                       |
| 79381724 | Non-coding | C16270T |                 |            | Melanoma patients                        |                                        |                       |
| 89025776 | Non-coding | T16311C |                 |            |                                          | Prostate tumor                         |                       |
| 92047842 | Non-coding | C16377T |                 |            |                                          |                                        |                       |
| 79443531 | Non-coding | T16356C |                 |            |                                          | Glioblastoma                           |                       |
| 79443532 | Non-coding | T16362C |                 |            |                                          |                                        |                       |
| 79381726 | Non-coding | G16391A |                 |            |                                          |                                        |                       |
| 89025727 | Non-coding | G16526A |                 |            |                                          |                                        |                       |

\*MITOMAP

ND = NADH dehydrogenase; CYB = Cytochrome b; CO = Cytochrome c oxidase; ATP = ATP synthase; POLG = Mitochondrial DNA polymerase  $\gamma$ ; PEO = Progressive external ophthalmoplegia; HPV = Human papillomavirus; MNGIE = Mitochondrial neurogastrointestinal encephalopathy; DEAF = Deafness; HCM = Hypertrophic cardiomyopathy; SZ = Schizophrenia; MELAS = Mitochondrial encephalomyopathy, lactic acidosis, and stroke-like episodes; LS = Leigh syndrome; DMDF = Diabetes mellitus and deafness; MIDD = Maternally inherited diabetes and deafness; SNHL = Sensorineural hearing loss; CPEO = Chronic progressive external ophthalmoplegia; MM = Mitochondrial myopathy; FSGS = Focal segmental glomerulosclerosis; ASD = Autism spectrum disorder; SIDS = Sudden infant death syndrome; LHON = Leber Hereditary optic neuropathy; CPT = Carnitine palmitoyltransferase deficiency; AD = Alzheimer's disease; PD = Parkinson's disease; LVNC = Left ventricular non-compaction cardiomyopathy; GDM = Gestational diabetes mellitus;

LDYT = Leber hereditary optic neuropathy and dystonia; MICM = Maternally inherited cardiomyopathy; AMD = Age-related macular degeneration; NRTI = Nucleoside reverse transcriptase inhibitor; MI = Myocardial infarction; POAG = Primary open angle glaucoma; MERRF = Myoclonic epilepsy with ragged red fibers; LD = Leigh disease; HiCM = Histiocytoid cardiomyopathy; NARP = Neuropathy, ataxia, and retinitis pigmentosa; MILS = Maternally inherited Leigh syndrome; sCJD = Sporadic Creutzfeldt-Jaokob disease; MS = Multiple sclerosis; MDD = Major depressive disorder; LIMM = Lethal infantile mitochondrial myopathy

**Table S28.** Illumina Human 1Mv1

| ID       | Gene            | Variant | Type of Variant | Amino Acid | Base Substitution<br>Associated Phenotypes* | Somatic Variant<br>Associated Variants* | PolyPhen-2 Prediction |
|----------|-----------------|---------|-----------------|------------|---------------------------------------------|-----------------------------------------|-----------------------|
| 13273403 | Non-coding      | C182T   |                 |            |                                             | POLG/PEO muscle                         |                       |
| 13273572 | Non-coding      | T217C   |                 |            |                                             |                                         |                       |
| 13273477 | Non-coding      | G228A   |                 |            |                                             |                                         |                       |
| 13273478 | Non-coding      | G247A   |                 |            |                                             |                                         |                       |
| 13273574 | Non-coding      | T250C   |                 |            |                                             |                                         |                       |
| 13273409 | Non-coding      | C295T   |                 |            |                                             | POLG/MNGIE muscle;<br>Glioblastoma      |                       |
| 13273415 | Non-coding      | C456T   |                 |            |                                             | Thyroid tumor                           |                       |
| 13273416 | Non-coding      | C462T   |                 |            |                                             | Thyroid tumor                           |                       |
| 13273584 | Non-coding      | T477C   |                 |            |                                             | AD brains; Ovarian tumor                |                       |
| 13273585 | Non-coding      | T489C   |                 |            |                                             | Ovarian carcinoma;<br>Prostate tumor    |                       |
| 13273499 | <i>12S rRNA</i> | A750G   |                 |            |                                             |                                         |                       |
| 13273350 | <i>12S rRNA</i> | A827G   |                 |            | DEAF; B4b'd marker                          |                                         |                       |
| 13273435 | <i>12S rRNA</i> | G1018A  |                 |            |                                             |                                         |                       |
| 13273359 | <i>12S rRNA</i> | C1048T  |                 |            |                                             |                                         |                       |
| 13273530 | <i>12S rRNA</i> | T1189C  |                 |            |                                             |                                         |                       |
| 13273457 | <i>12S rRNA</i> | G1438A  |                 |            |                                             |                                         |                       |
| 13273473 | <i>16S rRNA</i> | G1719A  |                 |            |                                             |                                         |                       |

| ID       | Gene            | Variant | Type of Variant | Amino Acid | Base Substitution Associated Phenotypes *                | Somatic Variant Associated Variants *               | PolyPhen-2 Prediction |
|----------|-----------------|---------|-----------------|------------|----------------------------------------------------------|-----------------------------------------------------|-----------------------|
| 13273322 | <i>16S rRNA</i> | A1736G  |                 |            |                                                          |                                                     |                       |
| 13273571 | <i>16S rRNA</i> | T2158C  |                 |            |                                                          |                                                     |                       |
| 13273406 | <i>16S rRNA</i> | T2352C  |                 |            | Possibly LVNC-associated                                 |                                                     |                       |
| 13273407 | <i>16S rRNA</i> | T2483C  |                 |            |                                                          |                                                     |                       |
| 13273479 | <i>16S rRNA</i> | A2706G  |                 |            |                                                          |                                                     |                       |
| 13273408 | <i>16S rRNA</i> | C2789T  |                 |            |                                                          |                                                     |                       |
| 13273575 | <i>16S rRNA</i> | T2885C  |                 |            |                                                          |                                                     |                       |
| 13273481 | <i>16S rRNA</i> | G3010A  |                 |            | Cyclic vomiting syndrome with migraine                   |                                                     |                       |
| 13273576 | <i>16S rRNA</i> | T3197C  |                 |            |                                                          |                                                     |                       |
| 13273328 | <i>ND1</i>      | A3348G  | Synonymous      | L14L       |                                                          |                                                     |                       |
| 13273577 | <i>ND1</i>      | T3394C  | Nonsynonymous   | Y30H       | LHON; Diabetes; CPT deficiency; High altitude adaptation | Acute leukemia platelets, leukocytes, & bone marrow | Benign                |
| 13273329 | <i>ND1</i>      | A3480G  | Synonymous      | K58K       |                                                          | Prostate tumor                                      |                       |
| 13273331 | <i>ND1</i>      | A3547G  | Nonsynonymous   | I81V       |                                                          |                                                     | Benign                |
| 13273412 | <i>ND1</i>      | C3594T  | Synonymous      | V96V       |                                                          | Thyroid tumor                                       |                       |
| 13273482 | <i>ND1</i>      | G3666A  | Synonymous      | G120G      |                                                          |                                                     |                       |
| 13273332 | <i>ND1</i>      | A3720G  | Synonymous      | Q138Q      |                                                          |                                                     |                       |
| 13273483 | <i>ND1</i>      | G3915A  | Synonymous      | G203G      |                                                          |                                                     |                       |
| 13273484 | <i>ND1</i>      | G3918A  | Synonymous      | E204E      |                                                          | Breast tumor                                        |                       |
| 13273413 | <i>ND1</i>      | C3970T  | Synonymous      | L222L      |                                                          |                                                     |                       |
| 13273414 | <i>ND1</i>      | C3992T  | Nonsynonymous   | T229M      |                                                          | Thyroid tumor                                       | Benign                |
| 13273333 | <i>ND1</i>      | A4024G  | Nonsynonymous   | T240A      |                                                          |                                                     | Benign                |
| 13273334 | <i>ND1</i>      | A4104G  | Synonymous      | L266L      |                                                          |                                                     |                       |
| 13273581 | <i>tRNA-Gln</i> | T4336C  |                 |            | AD; PD; Hearing loss & migraine                          |                                                     |                       |
| 13273582 | <i>ND2</i>      | T4561C  | Nonsynonymous   | V31A       |                                                          |                                                     | Benign                |
| 13273583 | <i>ND2</i>      | T4639C  | Nonsynonymous   | I57T       |                                                          |                                                     | Benign                |
| 13273486 | <i>ND2</i>      | A4769G  | Synonymous      | M100M      |                                                          |                                                     |                       |

| ID       | Gene            | Variant | Type of Variant | Amino Acid | Base Substitution<br>Associated Phenotypes *                                                    | Somatic Variant<br>Associated Variants * | PolyPhen-2 Prediction |
|----------|-----------------|---------|-----------------|------------|-------------------------------------------------------------------------------------------------|------------------------------------------|-----------------------|
| 13273487 | <i>ND2</i>      | G4820A  | Synonymous      | E117E      |                                                                                                 |                                          |                       |
| 13273339 | <i>ND2</i>      | A4824G  | Nonsynonymous   | T119A      |                                                                                                 |                                          | Possibly damaging     |
| 13273417 | <i>ND2</i>      | C4883T  | Synonymous      | P138P      |                                                                                                 |                                          |                       |
| 13273340 | <i>ND2</i>      | A4917G  | Nonsynonymous   | N150D      | Glaucoma<br>LHON; Insulin resistance;<br>AMD; NRTI-PN; Haplogroup<br>T marker                   |                                          | Benign                |
| 13273587 | <i>ND2</i>      | T4977C  | Synonymous      | L170L      |                                                                                                 |                                          |                       |
| 13273588 | <i>ND2</i>      | T5004C  | Synonymous      | L179L      |                                                                                                 |                                          |                       |
| 13273488 | <i>ND2</i>      | G5046A  | Nonsynonymous   | V193I      |                                                                                                 |                                          | Benign                |
| 13273419 | <i>ND2</i>      | C5178A  | Nonsynonymous   | L237M      | Longevity; Extraversion MI;<br>AMS protection; Blood iron<br>metabolism; Haplogroup D<br>marker |                                          | Probably damaging     |
| 13273420 | <i>ND2</i>      | C5263T  | Nonsynonymous   | A265V      |                                                                                                 |                                          | Benign                |
| 13273341 | <i>ND2</i>      | A5390G  | Synonymous      | M307M      |                                                                                                 |                                          |                       |
| 13273591 | <i>ND2</i>      | T5442C  | Nonsynonymous   | F325L      |                                                                                                 |                                          | Benign                |
| 13273491 | <i>ND2</i>      | G5460A  | Nonsynonymous   | A331T      | AD; PD                                                                                          |                                          | Benign                |
| 13273593 | <i>ND2</i>      | T5495C  | Synonymous      | F342F      |                                                                                                 |                                          |                       |
| 13273342 | Non-coding      | A5656G  |                 |            |                                                                                                 |                                          |                       |
| 13273492 | <i>tRNA-Cys</i> | G5773A  |                 |            |                                                                                                 |                                          |                       |
| 13273343 | <i>CO1</i>      | A5951G  | Synonymous      | G16G       |                                                                                                 |                                          |                       |
| 13273493 | <i>CO1</i>      | G6026A  | Synonymous      | L41L       |                                                                                                 |                                          |                       |
| 13273422 | <i>CO1</i>      | C6045T  | Synonymous      | L48L       |                                                                                                 |                                          |                       |
| 13273594 | <i>CO1</i>      | T6071C  | Synonymous      | V56V       |                                                                                                 |                                          |                       |
| 13273595 | <i>CO1</i>      | T6152C  | Synonymous      | V83V       |                                                                                                 |                                          |                       |
| 13273596 | <i>CO1</i>      | T6221C  | Synonymous      | P106P      |                                                                                                 |                                          |                       |
| 13273494 | <i>CO1</i>      | G6260A  | Synonymous      | E119E      |                                                                                                 |                                          |                       |
| 13273597 | <i>CO1</i>      | T6365C  | Synonymous      | G154G      |                                                                                                 |                                          |                       |
| 13273424 | <i>CO1</i>      | C6455T  | Synonymous      | F184F      |                                                                                                 |                                          |                       |
| 13273599 | <i>CO1</i>      | T6680C  | Synonymous      | T259T      |                                                                                                 |                                          |                       |

| ID       | Gene            | Variant | Type of Variant | Amino Acid  | Base Substitution<br>Associated Phenotypes * | Somatic Variant<br>Associated Variants * | PolyPhen-2 Prediction |
|----------|-----------------|---------|-----------------|-------------|----------------------------------------------|------------------------------------------|-----------------------|
| 13273600 | <i>CO1</i>      | T6719C  | Synonymous      | G272G       |                                              |                                          |                       |
| 13273495 | <i>CO1</i>      | G6734A  | Synonymous      | M277M       |                                              |                                          |                       |
| 13273345 | <i>CO1</i>      | A6752G  | Synonymous      | L283L       |                                              |                                          |                       |
| 13273601 | <i>CO1</i>      | T6776C  | Synonymous      | H291H       |                                              | Breast cystic masses                     |                       |
| 13273346 | <i>CO1</i>      | A7055G  | Synonymous      | G384G       |                                              | MNGIE fibroblasts                        |                       |
| 13273604 | <i>CO1</i>      | T7175C  | Synonymous      | T424T       |                                              |                                          |                       |
| 13273427 | <i>CO1</i>      | C7256T  | Synonymous      | N451N       |                                              |                                          |                       |
| 13273428 | <i>CO1</i>      | C7274T  | Synonymous      | G457G       |                                              |                                          |                       |
| 13273498 | <i>tRNA-Asp</i> | G7521A  |                 |             |                                              | Thyroid tumor                            |                       |
| 13273348 | <i>CO2</i>      | A7768G  | Synonymous      | M61M        |                                              |                                          |                       |
| 13273502 | <i>CO2</i>      | G8206A  | Synonymous      | M207M       |                                              |                                          |                       |
| 13273504 | <i>CO2</i>      | G8269A  | Synonymous      | Term228Term |                                              |                                          |                       |
| 13273607 | Non-coding      | T8277C  |                 |             |                                              |                                          |                       |
| 13273507 | <i>ATP6</i>     | G8616T  | Nonsynonymous   | L30F        |                                              |                                          | Probably damaging     |
| 13273432 | <i>ATP6</i>     | C8655T  | Synonymous      | I43I        |                                              |                                          |                       |
| 13273351 | <i>ATP6</i>     | A8869G  | Nonsynonymous   | M115V       |                                              |                                          | Benign                |
| 13273352 | <i>ATP6</i>     | A9072G  | Synonymous      | S182S       |                                              |                                          |                       |
| 13273353 | <i>ATP6</i>     | A9093G  | Synonymous      | T189T       |                                              |                                          |                       |
| 13273354 | <i>CO3</i>      | A9221G  | Synonymous      | S5S         |                                              |                                          |                       |
| 13273516 | <i>CO3</i>      | A9377G  | Synonymous      | W57W        |                                              |                                          |                       |
| 13273434 | <i>CO3</i>      | T9540C  | Synonymous      | L112L       |                                              | Tumor                                    |                       |
| 13273357 | <i>CO3</i>      | A9667G  | Nonsynonymous   | N154S       |                                              |                                          | Benign                |
| 13273611 | <i>CO3</i>      | T9698C  | Synonymous      | L164L       |                                              |                                          |                       |
| 13273612 | <i>CO3</i>      | T9716C  | Synonymous      | G170G       |                                              |                                          |                       |
| 13273613 | <i>CO3</i>      | T9899C  | Synonymous      | H231H       |                                              |                                          |                       |
| 13273614 | <i>CO3</i>      | T9950C  | Synonymous      | V248V       |                                              |                                          |                       |
| 13273520 | <i>tRNA-Gly</i> | T10034C |                 |             |                                              |                                          |                       |
| 13273284 | <i>tRNA-Gly</i> | A10044G |                 |             | SIDS                                         |                                          |                       |
| 13273522 | <i>ND3</i>      | T10238C | Synonymous      | I60I        |                                              |                                          |                       |

| ID       | Gene                 | Variant | Type of Variant | Amino Acid | Base Substitution Associated Phenotypes *                                                                                 | Somatic Variant Associated Variants *              | PolyPhen-2 Prediction |
|----------|----------------------|---------|-----------------|------------|---------------------------------------------------------------------------------------------------------------------------|----------------------------------------------------|-----------------------|
| 13273436 | <i>ND3</i>           | G10310A | Synonymous      | L84L       |                                                                                                                           |                                                    |                       |
| 13273523 | <i>ND3</i>           | T10321C | Nonsynonymous   | V88A       |                                                                                                                           | Bladder tumor                                      | Benign                |
| 13273437 | <i>ND3</i>           | A10398G | Nonsynonymous   | T114A      | PD protective factor; Longevity; Altered cellular pH; Metabolic syndrome; Breast cancer risk; ADHD; Haplogroup IJK marker | Thyroid tumor                                      | Benign                |
| 13273524 | <i>tRNA-Arg</i>      | T10463C |                 |            |                                                                                                                           | Endometrial tumor                                  |                       |
| 13273286 | <i>ND4L</i>          | A10550G | Synonymous      | M27M       |                                                                                                                           | Endometrial control tissue                         |                       |
| 13273438 | <i>ND4L</i>          | G10586A | Synonymous      | S39S       |                                                                                                                           |                                                    |                       |
| 13273439 | <i>ND4L</i>          | G10589A | Synonymous      | L40L       |                                                                                                                           |                                                    |                       |
| 13273440 | <i>ND4L</i>          | G10688A | Synonymous      | V73V       |                                                                                                                           |                                                    |                       |
| 13273360 | <i>ND4</i>           | T10873C | Synonymous      | P38P       |                                                                                                                           |                                                    |                       |
| 13273526 | <i>ND4</i>           | T10915C | Synonymous      | C52C       |                                                                                                                           |                                                    |                       |
| 13273288 | <i>ND4</i>           | A11251G | Synonymous      | L164L      |                                                                                                                           |                                                    |                       |
| 13273443 | <i>ND4</i>           | G11377A | Synonymous      | K206K      |                                                                                                                           |                                                    |                       |
| 13273289 | <i>ND4</i>           | A11467G | Synonymous      | L236L      | Altered brain pH; sCJD patients                                                                                           |                                                    |                       |
| 13273528 | <i>ND4</i>           | T11485C | Synonymous      | G242G      |                                                                                                                           |                                                    |                       |
| 13273364 | <i>ND4</i>           | T11722C | Synonymous      | L321L      |                                                                                                                           |                                                    |                       |
| 13273292 | <i>ND4</i>           | A11812G | Synonymous      | L351L      |                                                                                                                           |                                                    |                       |
| 13273529 | <i>ND4</i>           | T11899C | Synonymous      | S380S      |                                                                                                                           |                                                    |                       |
| 13273444 | <i>ND4</i>           | G11914A | Synonymous      | T385T      |                                                                                                                           |                                                    |                       |
| 13273445 | <i>ND4</i>           | G11969A | Nonsynonymous   | A404T      |                                                                                                                           |                                                    | Benign                |
| 13273294 | <i>tRNA-Leu(CUN)</i> | A12308G |                 |            | CPEO; Stroke; CM; Breast, renal, & prostate cancer risk; Altered brain pH; sCJD; Haplogroup K & U marker                  | Endometrial control tissue; Lung & prostate tumors |                       |
| 13273447 | <i>ND5</i>           | G12372A | Synonymous      | L12L       | Altered brain pH; sCJD patients                                                                                           | Prostate tumor                                     |                       |

| ID       | Gene       | Variant | Type of Variant | Amino Acid | Base Substitution<br>Associated Phenotypes * | Somatic Variant<br>Associated Variants *       | PolyPhen-2 Prediction |
|----------|------------|---------|-----------------|------------|----------------------------------------------|------------------------------------------------|-----------------------|
| 13273532 | <i>ND5</i> | T12414C | Synonymous      | P26P       |                                              | Pancreatic cancer cell line;<br>Prostate tumor |                       |
| 13273450 | <i>ND5</i> | G12630A | Synonymous      | W98W       |                                              |                                                |                       |
| 13273366 | <i>ND5</i> | C12669T | Synonymous      | D111D      |                                              |                                                |                       |
| 13273534 | <i>ND5</i> | C12705T | Synonymous      | I123I      |                                              | Prostate tumor                                 |                       |
| 13273451 | <i>ND5</i> | A12850G | Nonsynonymous   | I172V      |                                              |                                                | Possibly damaging     |
| 13273298 | <i>ND5</i> | A13105G | Nonsynonymous   | I257V      |                                              |                                                | Benign                |
| 13273299 | <i>ND5</i> | A13263G | Synonymous      | Q309Q      |                                              |                                                |                       |
| 13273368 | <i>ND5</i> | C13650T | Synonymous      | P438P      |                                              |                                                |                       |
| 13273301 | <i>ND5</i> | A13780G | Nonsynonymous   | I482V      |                                              |                                                | Benign                |
| 13273539 | <i>ND5</i> | T13789C | Nonsynonymous   | Y485H      |                                              |                                                | Probably damaging     |
| 13273541 | <i>ND5</i> | T13965C | Synonymous      | L543L      |                                              |                                                |                       |
| 13273543 | <i>ND6</i> | T14178C | Nonsynonymous   | I166V      |                                              |                                                | Benign                |
| 13273371 | <i>ND6</i> | T14212C | Synonymous      | V154V      |                                              |                                                |                       |
| 13273304 | <i>ND6</i> | A14233G | Synonymous      | D147D      |                                              |                                                |                       |
| 13273306 | <i>ND6</i> | A14582G | Nonsynonymous   | V31A       |                                              |                                                | Benign                |
| 13273549 | <i>CYB</i> | C14766T | Nonsynonymous   | T7I        |                                              |                                                | Benign                |
| 13273550 | <i>CYB</i> | T14783C | Synonymous      | L13L       |                                              |                                                |                       |
| 13273551 | <i>CYB</i> | T14798C | Nonsynonymous   | F18L       |                                              | Glioblastoma                                   | Benign                |
| 13273461 | <i>CYB</i> | G15043A | Synonymous      | G99G       | MDD-associated                               |                                                |                       |
| 13273462 | <i>CYB</i> | G15110A | Nonsynonymous   | A122T      |                                              |                                                | Benign                |
| 13273311 | <i>CYB</i> | A15218G | Nonsynonymous   | T158A      |                                              |                                                | Possibly damaging     |
| 13273312 | <i>CYB</i> | A15244G | Synonymous      | G166G      |                                              |                                                |                       |
| 13273463 | <i>CYB</i> | G15257A | Nonsynonymous   | D171N      | LHON; Haplogroup J2<br>marker                |                                                | Benign                |
| 13273313 | <i>CYB</i> | G15301A | Synonymous      | L185L      |                                              | Tumor                                          |                       |
| 13273377 | <i>CYB</i> | C15535T | Synonymous      | N263N      |                                              |                                                |                       |
| 13273555 | <i>CYB</i> | T15670C | Synonymous      | H308H      |                                              | Breast tumor                                   |                       |
| 13273316 | <i>CYB</i> | A15758G | Nonsynonymous   | I338V      |                                              |                                                | Benign                |

| ID       | Gene            | Variant | Type of Variant | Amino Acid | Base Substitution<br>Associated Phenotypes *                     | Somatic Variant<br>Associated Variants *     | PolyPhen-2 Prediction |
|----------|-----------------|---------|-----------------|------------|------------------------------------------------------------------|----------------------------------------------|-----------------------|
| 13273556 | CYB             | T15784C | Synonymous      | P346P      | POAG- potential for association                                  | Pancreatic cancer cell line;<br>Breast tumor |                       |
| 13273378 | CYB             | C15833T | Synonymous      | L363L      |                                                                  |                                              |                       |
| 13273379 | <i>tRNA-Thr</i> | C15904T |                 |            |                                                                  |                                              |                       |
| 13273318 | <i>tRNA-Thr</i> | A15924G |                 |            | LIMM                                                             |                                              |                       |
| 13273465 | <i>tRNA-Thr</i> | G15928A |                 |            | Multiple sclerosis; Idiopathic repeat miscarriage; AD protection |                                              |                       |
| 13273466 | <i>tRNA-Thr</i> | G15930A |                 |            |                                                                  |                                              |                       |
| 13273467 | Non-coding      | G16129A |                 |            | Cyclic vomiting syndrome with migraine                           |                                              |                       |
| 13273559 | Non-coding      | T16144C |                 |            |                                                                  |                                              |                       |
| 13273468 | Non-coding      | G16145A |                 |            |                                                                  |                                              |                       |
| 13273382 | Non-coding      | C16148T |                 |            |                                                                  | Aging brains                                 |                       |
| 13273319 | Non-coding      | A16162G |                 |            |                                                                  |                                              |                       |
| 13273320 | Non-coding      | A16163G |                 |            |                                                                  |                                              |                       |
| 13273384 | Non-coding      | A16183C |                 |            | Melanoma patients                                                | Lung tumor back-mutation; Prostate tumor     |                       |
| 13273395 | Non-coding      | C16270T |                 |            | Melanoma patients                                                |                                              |                       |
| 13273396 | Non-coding      | C16278T |                 |            |                                                                  | Ovarian control tissue                       |                       |
| 13273401 | Non-coding      | C16327T |                 |            |                                                                  |                                              |                       |
| 13273471 | Non-coding      | G16390A |                 |            | POAG- potential for association                                  | Breast & ovarian tumor                       |                       |
| 13273472 | Non-coding      | G16391A |                 |            |                                                                  |                                              |                       |

\*MITOMAP

ND = NADH dehydrogenase; CYB = Cytochrome b; CO = Cytochrome c oxidase; ATP = ATP synthase; POLG = Mitochondrial DNA polymerase  $\gamma$ ; MNGIE = Mitochondrial neurogastrointestinal encephalopathy; AD = Alzheimer's disease; DEAF = Deafness; LVNC = Left ventricular non-compaction cardiomyopathy; LHON = Leber Hereditary optic neuropathy; CPT = Carnitine palmitoyltransferase deficiency; PD = Parkinson's disease; AMD = Age-related macular degeneration; NRTI = Nucleoside reverse transcriptase inhibitor; MI = Myocardial infarction; SIDS = Sudden infant death



---

syndrome; ADHD = Attention deficit-hyperactivity disorder; sCJD = Sporadic Creutzfeldt-Jaokob disease; CPEO = Chronic progressive external ophthalmoplegia; CM = Cardiomyopathy; MDD = Major depressive disorder; POAG = Primary open angle glaucoma; L IMM = Lethal infantile mitochondrial myopathy

**Table S29.** MT-MeSH Terms Extracted from Literature Lab. The number of MT-nDNA candidate genes selected are based on upper (25<sup>th</sup>) quartile of Literature Lab's LPF statistics. Moreover, later we conditioned each gene to have at least 15 abstracts.

| No | MeSH Term                                          | Number of genes in upper quartile |
|----|----------------------------------------------------|-----------------------------------|
| 1  | Aldehyde dehydrogenase, mitochondrial              | 112                               |
| 2  | Aspartate aminotransferase, mitochondrial          | 17                                |
| 3  | Creatine kinase, mitochondrial form                | 26                                |
| 4  | DNA, mitochondrial                                 | 635                               |
| 5  | Electron transport in mitochondria                 | 448                               |
| 6  | Genes, mitochondrial                               | 139                               |
| 7  | Genome, mitochondrial                              | 99                                |
| 8  | Membrane potential, mitochondrial                  | 580                               |
| 9  | Mitochondria                                       | 1,990                             |
| 10 | Mitochondria apoptotic                             | 974                               |
| 11 | Mitochondria, heart                                | 306                               |
| 12 | Mitochondria, liver                                | 352                               |
| 13 | Mitochondria, muscle                               | 409                               |
| 14 | Mitochondrial ADP, ATP translocases                | 135                               |
| 15 | Mitochondrial carnitine palmitoyltransferase       | 396                               |
| 16 | Mitochondrial degradation                          | 120                               |
| 17 | Mitochondrial diseases                             | 422                               |
| 18 | Mitochondrial dynamics                             | 221                               |
| 19 | Mitochondrial encephalomyopathies                  | 103                               |
| 20 | Mitochondrial gene expression                      | 102                               |
| 21 | Mitochondrial LC fatty-acid beta-oxidation         | 2                                 |
| 22 | Mitochondrial membrane transport proteins          | 669                               |
| 23 | Mitochondrial membranes                            | 422                               |
| 24 | Mitochondrial myopathies                           | 167                               |
| 25 | Mitochondrial proteins                             | 1,350                             |
| 26 | Mitochondrial proton- translocating ATPases        | 200                               |
| 27 | Mitochondrial ribosomes                            | 43                                |
| 28 | Mitochondrial size                                 | 66                                |
| 29 | Mitochondrial swelling                             | 157                               |
| 30 | Mitochondrial trifunctional protein                | 33                                |
| 31 | Mitochondrial trifunctional protein, alpha subunit | 4                                 |
| 32 | Mitochondrial trifunctional protein, beta subunit  | 7                                 |
| 33 | Mitochondrial turnover                             | 242                               |
| 34 | Mitochondrial uncoupling protein 2                 | 62                                |
| 35 | Mitochondrial uncoupling protein 3                 | 16                                |
| 36 | Mitochondrial uncoupling proteins                  | 308                               |

---

**Table S30.** Selected 2,283 Candidate Genes (MT-nDNA) that May Contribute to Mitochondria  
(**Separate Excel Worksheet**)

**Table S31.** Final list of genes (HUGO approved names) as mtDNA- and possible MT-genes  
candidates for contributing to mitochondria and corresponding MIM number and location.  
(**Separate Excel Worksheet**)

**Table S32.** Predicted Functional Effects of mtDNA Non-Synonymous Mutations Present in Our  
Arrays.  
(**Separate DOCX Table**)

---

### 3. Supplementary Methods

#### 1. Phenotype Preparation

Seven variables were studied: 1). BMI-body mass index ( $\text{kg}/\text{m}^2$ ); 2). WHR- waist to hip ratio, a unit-less measure with the condition that both waist and hip were measured with the same unit; 3). Fasting glucose- Fasting at least 8 hours prior to measurement of serum glucose ( $\text{mg}/\text{dL}$ ). If GLUC was measured in  $\text{mmol}/\text{L}$ , it was requested to convert it into  $\text{mg}/\text{dL}$ , by applying the following coefficient:  $\text{mmol}/\text{l} \times 18.0182 = \text{mg}/\text{dL}$ , based on [SBDR - SOCIETY FOR BIOMEDICAL DIABETES RESEARCH](#); 4). Fasting INS-insulin ( $\mu\text{IU}/\text{mL}$ ). For studies that had measured INS as  $\text{pmol}/\text{L}$  it was asked to convert it to ( $\mu\text{IU}/\text{mL}$ ), by dividing the measure by 6:  $\text{INS} (\mu\text{IU}/\text{mL}) = \text{INS} (\text{pmol}/\text{L}) / 6$ . (See the following paper for why the constant 6 was applied by Heinemann L.<sup>1</sup>); 5). HOMA-B- an indicator of beta-cell function calculated as  $\text{HOMA-B} = (360 \times \text{Fasting Insulin}) / (\text{Fasting Glucose} - 60)$  with fasting insulin expressed in  $\mu\text{IU}/\text{ml}$  and fasting glucose in  $\text{mg}/\text{dL}$ ; 6). HOMA-IR- an indicator of insulin resistance was calculated as  $\text{HOMAIR} = (\text{Fasting Glucose} \times \text{Fasting Insulin}) / 405$ , with fasting insulin expressed in  $\mu\text{IU}/\text{mL}$  and fasting glucose in  $\text{mg}/\text{dL}$ ; and 7). HbA1c- representing the glycosylated hemoglobin measured as a percent. For GLUC and INS, cohorts were required to remove individuals that were type 2 diabetics.

All studies transformed variables to the same units, checked the distributions of selected variables and assured they were close to normal with a kurtosis less than 2, and if there were one or two outliers the studies were asked to ensure they were not distorting the distribution of a specific variable. An observation was considered to be an outlier, if it was 1 standard deviation (SD) away from the rest of the points in the trait distribution and beyond 4-6 SDs from the mean. If such a few values existed, then the study was instructed to either winsorize (assign to an outlier a value around 4 SDs) the outlier or set the outlier to a missing value for a specific trait when the study analyst discovered that this outlier value was a data mistake. For BMI, if the data were normal then no changes were to be made, but if the data were non-normal a BLOM transformation was used as the last resort.<sup>2</sup> All studies were instructed to transform INS, HOMA-B, HOMA-IR by natural log. GLUC for each study in its original measure could have been normally distributed. If not, GLUC was not normally distributed, then the studies were instructed to apply a Box-Cox power transformation when deemed appropriate. Only after each study cohort's data were assured to have a close to normal distribution, did the studies performed adjustments. The following covariates were considered for adjusting for any confounding: AGE, AGE<sup>2</sup>, SEX (coded male=0, female=1), FC (field center for multi-center studies by creating n-1 dichotomous covariates where n= number of field centers), and PC1, PC2 etc: principal components (PCs) derived using genotyped SNPs: the first PC (and optionally more PCs, if appropriate for African Americans) were instructed to be included. Other additional cohort-specific covariates, if any, were going to be used for controlling additional confounding. The analyses were performed for each specific race separately. The final response variables (Y) were the standardized residuals after any transformation and covariate adjustments. WHR was adjusted in addition for BMI. The studies were requested to exclude individuals younger than 18 years old, without GWAS data, without data for any of the covariates and excluding T2D individuals ONLY from glycaemic traits analyses. Participants with missing values for one trait were used for analysis of any other trait for which they had data. The Division of Statistical Genomics at the Washington University in Saint Louis volunteered to serve as a Data Coordinating Center (DCC) by maintaining an anonymous FTP site for studies to perform data

---

upload, a secured Web page for archiving all meetings, analyses plans, publicly available data-shared including the mitochondria 1000 Genomes reference used for MT imputations, minutes, programs and instructions, and a box.com site shared with specific analysts for downloading single cohorts QC-ed summary results for performing double meta-analyses and QC sharing. Each study cohort reported summary statistics for the phenotypes, which were checked at the DCC for their accuracy (Table S1).

## 2. Mitochondrial Single Nucleotide Variant Annotation

The mitochondrial genome sequence used for annotation of mitochondrial single nucleotide variant and whole genome sequencing studies is controversial<sup>3</sup>. Historically, the first complete sequence of the mitochondrial genome, the Cambridge Reference Sequence, has been used for mitochondrial genome annotation<sup>4</sup>. With improved sequencing, several errors were found in the original sequencing of the Cambridge Reference Sequence<sup>5</sup>. The errors were corrected in the revised Cambridge Reference Sequence (rCRS; GenBank #NC\_012920) while maintaining the original nucleotide sequence numbering<sup>5</sup>. The rCRS is from an individual of European origin, mitochondrial haplotype H2a2, which is a much younger mitochondrial genome in the historical time scale. Most genomic studies utilize reference sequences that are the oldest based upon ancestral lineage, which in the case of the mitochondrial genome, is an African haplogroup. Consequently, some microarrays have utilized a Yoruban sequence (AF347015) or a Reconstructed Sapiens Root Sequence (RSRS), a phylogenetically created sequence representing the deepest root<sup>6,7</sup>. However, the Yoruban sequence is 16,571 bp in length and differs from the rCRS at over 40 positions resulting in inconsistencies in the literature and across arrays regarding the nucleotide position of some single nucleotide variants<sup>6</sup>. The RSRS contains three spacers in order to maintain the nucleotide position numbering of the rCRS, but also differs from the rCRS at over 51 sites.

Consequently, all mitochondrial DNA variants from each array (Table S14) were annotated to conform the nucleotide position numbering of the rCRS prior to analyses. The probes used for each microarray were obtained from the manufacturer or dbSNP and aligned to the rCRS using Geneious 8.1<sup>8</sup>. All probes were also submitted through the Standard Nucleotide Basic Local Alignment Search Tool (BLAST) to ensure the probes bound with high specificity ( $\geq 90\%$  identity) to the mitochondrial genome. In order to limit any potential binding to nuclear mitochondrial DNA segments, probes that bound to nuclear chromosomes with  $\geq 80\%$  were excluded from all analyses. (Tables S15-S28)

## 3. mtDNA Genotyping and Imputation QC

Each cohort assured that mtDNA variants kept for analyses were of high quality and matching only to mitochondrial DNA. mtDNA markers that were found not valid were dropped from the analyses. The remaining qualitative MT-variants were updated with latest MT Cambridge Revised Sequence (rCRS) of the Human mtDNA positions. The qualitative MT-variants were used as scaffold for haplotype prephasing and for mtDNA imputation. The MT imputation followed the same plan for all cohorts. Each study built genotype data into two files: a pedigree file and a map file known also as PED (pedigree\_ID, subject\_ID, father\_ID, mother\_ID, sex, dummy\_affection, and Variants (in homozygote letters) in the same order as in the map) and MAP. If any marker was heterozygote, PLINK<sup>9,10</sup> software turned them to missing by default for MT.

---

We turned files into binary for faster processing (input llfs26.csv; output ganon26):

```
plink --noweb --file llfs26.csv --out ganon26 --make-bed
```

We dropped any variants with missengness > 0.9 (input ganon26; output new26):

```
plink --noweb --bfile ganon26 --geno 0.1 --make-bed --out new26
```

For prephasing of MT-haplotypes we used SHAPEIT2<sup>11,12</sup> using the following command line (input new26; output ganon26.phased)

```
shapeit --input-bed ./new26.bed ./new26.bim ./new26.fam --duohmm --rho 4.0E-12 -O ganon26.phased
```

-duohmm is an option in SHAPEIT program when a cohort contains family data and SHAPEIT will use nuclear family data information for imputation

-rho option was used to define some very tiny recombination rates between variants, because no genetic map was available.

All studies downloaded the following files from 1000 Genomes project, where the first file was to be used as MT-reference in each cohort MT-imputations

```
ALL.chrMT.phase3_callmom-v0_4.20130502.genotypes.vcf.gz
```

```
ALL.chrMT.phase3_callmom-v0_4.20130502.genotypes.vcf.gz.tbi
```

```
README_chrMT_phase3_callmom.md
```

For the needed MT genetic map we created the following file (mtgeneticmap.map):

```
position COMBINED_rate.cM.Mb. Genetic_Map.cM
```

```
1          0          0
16579     0          0.02
```

The file from 1000G was transformed into OXFORD format file as follows using VCFTOOLS and a new version of PLINK written in C++<sup>10</sup>.

```
vcftools --gzvcf ALL.chrMT.phase3_callmom-v0_4.20130502.genotypes.vcf.gz --max-alleles 2 --min-alleles 2 --max-missing 1 --remove-filtered-geno-all --recode --out chrMTfilter
```

```
vcftools --vcf chrMTfilter.recode.vcf --plink-tped --out ALL.chrMT.phase3
```

```
plink1_9 --tfile ALL.chrMT.phase3 --recode oxford --out oxg1000ref.gen
```

```
sed -i '2d' oxg1000ref.sample
```

```
cut -d' ' -f2,3,4,5 < oxg1000ref.gen > oxg1000ref.legend
```

```
echo "rsID position a0 a1" > header1.txt
```

```
cat header1.txt oxg1000ref.legend > fin.oxg1000ref.legend
```

The following script was executed to run IMPUTE<sup>13</sup> for imputation based on full MT sequence.

---

```
#/bin/bash! impute \ -merge_ref_panels -m ./mtgeneticmap.map -h ./g1000mtref/oxg1000ref.gen  
\ -l ./g1000mtref/fin.oxg1000ref.legend \ -known_haps_g ./ganon26.phased.haps \ -int 1 16579 \  
-Ne 20000 \ -o ./c26_all
```

The command `merge_ref_panels` gives the opportunity to use more than one reference, but in our case we used only 1000G MT reference. As expected the IMPUTE software will produce a warning that we are using 1 reference only, as expected.

`-int 1 16579` option defined the imputation window, which included the full length of MT-DNA, including all variants for each cohort as well as all markers of 1000G MT reference.

`-known_haps_g` refers to a cohort specific SHAPEIT prephased haplotypes

The imputed results were in OXFORD format with three probabilities (AA, AB and BB) per cell. Because we wished to use our own programs for MT-variants associations with 7 selected phenotypes, the three probability calls per cell as produced by IMPUTE software had to be transformed into dosage. We used FCGENE software (<https://sourceforge.net/projects/fcgene/>) for turning three probability calls per cell to dosage for each individual and for each marker imputed:

```
fcgene --gens ../c26_all \  
--thresh 0.9 \  
--info ../c26_all_info \  
--info-thresh 0.3 \  
--maf-thresh 0.00 \  
--pedinfo ./ganon26.phased.sample \  
--oformat r --transpose \  
--force ref-allele=allele2 \  
--out ./rtc26
```

The mtDNA single imputed variants were excluded prior to association tests analyses, when the imputation quality was  $< 0.30$  or they were monomorphic SNVs. The R Package: EasyQC (*V10.0*)<sup>14</sup> (<http://www.genepi-regensburg.de/easyqc/>) was used at DCC to check for any duplicated results, removing the SNVs with miss-matched alleles against the MT 1000 Genomes reference (phase 3 version 5, 3892 MT-variants, <ftp.1000genomes.ebi.ac.uk/vol1/ftp/release/20130502>), and eliminating SNVs with allele frequency deviant from the MT 1000 Genomes cosmopolitan reference.

In addition, in house SAS programs (SAS 9.4, SAS Institute Inc., Cary, NC, USA) were used to check the coded alleles and non-coded alleles matching among all cohorts. Any discrepancies of coded alleles were corrected by studies.

The detailed information of the mtDNA genotyping array, the number of mtDNA variants genotyped, the number of mtDNA variants used for imputation, the number of MT variants imputed, imputation accuracy, and the number of mtDNA variants after fcGENE for each cohort are included in Tables S14 and S15-S28.

---

#### 4. mtDNA Variants Association Tests (Single variant linear regression and gene based SKAT tests)

Additional quality control procedures were applied in statistical analysis. These procedures included: 1). removal of mtDNA variants if their imputation quality scores  $\leq 0.3$ ; 2). setting mtDNA variants as missing if their dosage values=1; and 3). removal of mtDNA variants if their missing rates  $\geq 5\%$ . Heteroplasmic alleles are rare in genotyping of mtDNA variants with genotyping arrays. Therefore, we set these rare heteroplasmic alleles as missing before and after imputation.

For each of the imputed mtDNA variants, the dosage values (0 or 2) were used as the independent variable in association analysis with prepared standardized phenotypes (standardized residuals from normally distributed variables and adjusted for covariates, see 1. Phenotype preparation) as the outcome. An additive genetic model was employed in association analysis using both a self-developed regression model (the linear or linear mixed models written in R programming) and a SKAT (the prepScores() function in seqMeta R package: seqMeta package: Meta-Analysis of Region-Based Tests of Rare DNA Variants; <https://github.com/DavisBrian/seqMeta>) approaches. Familial and maternal correlation structures<sup>15</sup> were accounted for in the analysis of the family data.

For single mtDNA SNV association tests, the models were two:

$Y = \beta SNV + \epsilon$  (1) for unrelated individuals, where  $\beta$  is the estimated slope between SNV dosages regressed on residuals of each of 7 trait responses and  $\epsilon$  is the remaining unexplained effects, and

$Y = \beta SNV + \gamma + \delta + \epsilon$  (2) for familial, where  $\gamma$  is the familial vector of relationships and  $\delta$  is an indicator of maternal relationships.

For SKAT gene based mtDNA associations, the models were also two:

$Y = GSNVs_i + \epsilon$  (3) for unrelated individuals, where  $G$  is an  $n \times q$  genotype matrix for  $i=1$  to  $q$  rare SNVs of interest, and

$Y = GSNVs_i + \gamma + \delta + \epsilon$  (4) for familial designs, where  $\gamma$  and  $\delta$  are the same as described above in model (2).

#### 5. mtDNA Meta-analyses (single-variant and gene-based)

The single mtDNA variant meta-analyses were performed with METAL<sup>16</sup> (Table 1, Figure 1 and Figures S1-S7). For the METAL meta-analysis the Genomic Control correction was set to off, because the MT-DNA it is a small molecule of 16.6KB. The analyses included all ancestries and Europeans only. Filters implemented were: imputation quality  $>0.3$  (implemented at the run of association programs). The threshold used for Bonferroni corrections was considered to be  $P \leq 1E-3$ , which is based upon our working group internal permutation tests using the ARIC study MT data, in which 49 MT-DNA variants were considered independent MT-DNA markers. The METAL software used was the 2011-03-25 release.

The possibility that an aggregation of rare or low-frequency alleles in 37 mtDNA coding genes contribute to variation in metabolic phenotypes was tested by the standard burden and sequence



---

kernel test (SKAT). The standard burden test<sup>17,18</sup> is sensitive in detecting association when all variants have effects on a phenotype in a concordant direction. The SKAT test is designed to detect the effects of alleles that collectively contribute to higher and lower blood pressure. The `skatMeta()` and `burdenMeta()` functions in the `seqMeta`<sup>19</sup> package were used to evaluate aggregate effects at gene-level at minor allele frequency (MAF)  $\leq 0.01$  (T1) or MAF  $\leq 0.05$  (T5) levels. We used the relaxed threshold  $P \leq 0.01$  to demonstrate significance.

## 6. mtDNA Genomic Associations

Previous studies have reported a number of mitochondrial SNVs / genes with pleiotropic effects (a SNV or a gene, or different SNVs within the same gene associate simultaneously with different traits). For example, Hudson *et al*<sup>20</sup> evaluated the association of mtDNA variation in cases/diseases (38,638 individuals with 11 major diseases) and healthy controls (17,483). Among others, they reported association of the MT-3197 (rs2854131) in *MT-RNR2*, the mitochondrial 16S rRNA, with schizophrenia, ulcerative colitis, ankylosing spondylitis, multiple sclerosis, ischemic stroke and Parkinson's disease. The same MT-3197, in our study, was associated with BMI ( $P=2.95E-03$ ,  $N=127,224$ , PA), but did not pass our study Bonferroni  $P \leq 5E-04$  threshold. It is possible that mtDNA variants/genes associating with glucose metabolism and insulin signaling may have multiple effects in other disease manifestations beyond T2D. A study by Fetterman *et al*<sup>21</sup> focused on measures of vascular function in Framingham Heart Study - EA in 7,247 individuals genotyped for 268 variants. After multiple corrections, only MT-13966 remained significant in association with PAT ratio (a measure of microvascular function). For the seven traits studied here, no significant associations were found with this variant. Mitchell *et al*<sup>22</sup> focused on cardiovascular related traits and T2D in BioVU - AA 15,863 sample genotyped for 135 variants. The authors of this publication considered their study exploratory in nature and did not correct for multiple testing. They did not report any significant associations with BMI, and the remaining results, including those for T2D, were modest. Another paper was published by Liu *et al*<sup>15</sup>. We summarized the results of three publications mentioned above using a threshold of  $P < 5E-02$  (Table S13). These comparisons in our findings do not pass our liberal  $P$ -value ( $P=1E-03$ ) threshold.

## 7. MT-nDNA Candidate Genes

For identifying MT-nDNA candidate genes we used four sources of candidate genes: a) MitoCarta 2.0<sup>23,24</sup>, b) Literature Lab (<http://Acumenta.com>), c) MitoMiner (<http://mitominer.mrc-mbu.cam.ac.uk/release-4.0/begin.do>) and d) MT-defects associated with  $\beta$ -cell dysfunction<sup>25</sup>. MitoCarta 2.0 is an inventory of human and mouse autosomal genes encoding proteins with strong support of mitochondrial localization. To identify mitochondria associated genes, MitoCarta performed mass spectrometry of mitochondria isolated from fourteen tissues. Protein localization was assessed using large-scale GFP tagging/microscopy, and integration of these results with six other genome-scale datasets of mitochondrial localization using a Bayesian approach. The two separate sets (human genes and mouse ortholog genes) from MitoCarta. The second source of autosomal candidate genes was established by us using Literature Lab (Acumenta Biotech, Westminister, MA), a software that mines more than 17.5 million PubMed abstract published since January 1, 1990, using MeSH search terms (MeSH terms are the US National Library of Medicine's controlled vocabulary thesaurus, consisting of sets of terms naming descriptors arranged in both alphabetic and in a hierarchical structure that permits

---

searching at various levels of specificity). For example, we searched via Literature Lab for MeSH mitochondria and identified 36 terms from which we selected only the 25<sup>th</sup> upper quartile number of genes from a LPF scoring distribution (Table S29). The term LPF is a quantitative expression of association of number of genes with a term (one of the 36 terms,  $x/\text{Term1}$ ) overlapping ( $x$ ) with genes in pathway analysis ( $x/\text{Term2}$ ), and expressed as  $\text{LPF} = \log(x/\text{T1} * x/\text{T2})$  (Figure S15). In addition, we kept genes that were from human nomenclature as well as we accepted only genes that had more than 15 abstracts cited per selected gene. The Literature Lab searches identified additional unique genes predicted to have association with mitochondria terms.

We used the software MitoMiner (4.0)<sup>26</sup>, which identified additional MT-nDNA candidate genes (filtered with an MT-MitoMiner index  $\geq 0.70$ , by selecting only terms: “Known mitochondrial” and “Predicted mitochondrial”). In MitoMiner selection, we kept only genes that were from human nomenclature. Finally, we identified a list of genes from a publication for gene expression in mouse, which proteins found in MT were down- or up- regulated in conditions of  $\beta$ -cell dysfunction. Of this list, only 3 were new to MT-candidate genes. The final list of MT-nDNA candidate genes reached 2,283.

We merged the final list of MT-nDNA candidate genes with online available summary meta-results. With the set of nDNA SNPs selected, we queried published GWAS summary results for BMI (Speliotes et al, 2010<sup>27</sup>, Yang et al, 2012<sup>28</sup>, Berndt et al, 2013<sup>29</sup>, Randall et al, 2013<sup>30</sup>, Monda et al, 2013<sup>31</sup>, Locke et al, 2015<sup>32</sup>, Shungin et al, 2015<sup>33</sup>, NG et al, 2017<sup>34</sup>, Justice et al, 2017<sup>35</sup>); for WHR (Heid et al, 2010<sup>36</sup>, Randall et al, 2013<sup>30</sup>, Berndt et al, 2013<sup>29</sup>, Shungin et al, 2015<sup>33</sup>, Justice et al, 2017<sup>35</sup>, NG et al, 2017<sup>34</sup>, Graph et al, 2017<sup>37</sup>). The summary results data were retrieved from

[https://portals.broadinstitute.org/collaboration/giant/index.php/GIANT\\_consortium\\_data\\_files](https://portals.broadinstitute.org/collaboration/giant/index.php/GIANT_consortium_data_files).

For glucose metabolism we used the following summary results: GLUC (Saxena et al, 2010<sup>38</sup>, Dupuis et al, 2010<sup>39</sup>, Manning et al, 2010<sup>40</sup>, Scott et al, 2012<sup>41</sup>); for INS (Dupuis et al, 2010<sup>39</sup>, Manning et al, 2010<sup>40</sup>, Scott et al, 2012<sup>41</sup>, Prokopenko et al, 2014<sup>42</sup>, Strawbridge et al, 2011<sup>43</sup>, Walford et al, 2016<sup>44</sup>); for HOMAB (Dupuis et al, 2010<sup>39</sup>); for HOMAIR (Dupuis et al, 2010<sup>39</sup>). The summary results data were retrieved from <https://www.magicinvestigators.org/downloads/>. For HbA1c we used the following resources (Soranzo et al, 2010<sup>45</sup>, Wheeler et al, 2017<sup>46</sup>).

Finally, from all these merges, we identified 109 MT-nDNA candidate genes comprising 588 sentinel significant SNPs (one unique per gene and trait combination out of 7 traits) (Table 4).

We have provided detailed analysis in the manuscript for MT-nDNA candidate gene functions. Here in the Supplement, we follow with some additional information. We found many interesting functions within the list of 109 genes: one gene is part of the urea-cycle; one has a role in iron-sulphur cluster biogenesis<sup>47</sup>; four genes regulate intracellular calcium concentration<sup>47</sup>; ten genes are associated with apoptosis<sup>48</sup>; and four genes play a role in production and signaling of reactive oxygen species (ROS)<sup>49</sup> (Figure S11). In our study, two transcription factors *FOXO1* (13q14.11, may play a role in myogenic growth, rs1078892,  $P=5.11\text{E-}08$ ) and *FOXO3* (6q21, a possible trigger for apoptosis, rs9400239,  $P=1.61\text{E-}08$ ) were associated with BMI, while the deacetylase *SIRT3* (11p15.5, regulates epigenetic gene silencing, rs4758633,  $P=3.44\text{E-}10$ ) was associated with HbA1c. They regulate metabolic homeostasis in response to oxidative stress. *SIRT3* deacetylates *FOXO3*<sup>50</sup>. *FOXO1* negatively regulates adipogenesis by binding to the promoter sites of *PPARG* and preventing its transcription, while

---

insulin represses *FOXO1* action<sup>51,52</sup>. Peserico *et al*<sup>53</sup> found that a low glucose nutrition regimen induced the formation of a complex consisting of *FOXO3*, *SIRT3* and MT-RNA polymerase binding to mtDNA regulatory regions and associated with increased MT-respiration.

## 8. Enrichment Analysis of MT-nDNA Candidate Genes

The 109 MT-nDNA selected genes are candidates for MT based on their protein localization in mitochondrion as well as from mining the published literature. We used Literature Lab and MetaCore software and the corresponding databases to explore the 109 genes. The enrichment analysis provided information of gene relations with terms, pathways, diseases, and gene ontology processes, and clustering to understand MT-nDNA genes' role. Using Literature Lab six gene clusters in association with terms were identified (Figure S10). Clusters, two and five included strong associations with mitochondria and obesity. In Cell-Type-MeSH, the term "Mitochondria" associated with the following genes (% of abstracts in relation with the term and permutation *P*-value): *BCL2* (58), *SIRT3* (8), *OGDH* (6), *PPARG* (6), *HK1* (5), *TOMM40* (4), *TSPO* (4), *CPT1A* (3), *DNMI* (1), *LRPPRC* (1), and *TNF* (1) ( $P=9.8E-03$ ); term "Mitochondria, Liver" associated with *CYP27A1* (18), *CPS1* (16), *OGDH* (15), *CPT1A* (10), *SIRT3* (9), *BCL2* (9), *HADHA* (4), *HK1* (4), *BCKDK* (3), *PPARG* (2) and *LRPPRC*(1) ( $P=9.9E-03$ ); and "Mitochondrial membranes" associated with *TOMM40* (42), *BCL2* (37), *TSPO* (10), *HK1* (3), *PHB2* (2), *DNMI* (2), and *CPT1A* (1) ( $P=1.01E-02$ ). A number of pathways showed significant associations with several of the 109 M-nDNA candidate genes. For example, "Biotransformation" ( $P=0E-04$ ): (The chemical alteration of an exogenous substance by or in a biological system); and terms from Metabolism-MeSH domain such as "Glycolysis" ( $P=5.4E-03$ ), "Citric Acid Cycle" ( $P=7.1E-03$ ), "Carbohydrate metabolism" ( $P=7.7E-03$ ), "Metabolome" ( $P=9.7E-03$ ), and "Lipogenesis" ( $P=1.26E-02$ ) (Table S5).

Using MetaCore, the set of MT-nDNA genes associated (*P*-FDR) with BMI showed enrichment in the pathway of "Protein folding and maturation\_POMC processing" ( $P=3.5E-30$ ); process network of "Signal transduction\_Neuropeptide signaling pathways" ( $P=1.8E-17$ ); by disease "Musculoskeletal and Neural Physiological Phenomena" ( $P=7.9E-37$ ); "Hyperinsulinism" ( $P=6.8E-35$ ); "Overweight" ( $P=4.2E-34$ ); and "Adrenocortical Hyperfunction" ( $P=1.7E-33$ ). For the set of MT-nDNA candidate genes associated with glycemic traits we found enrichment for disease "Nutritional and Metabolic Diseases" ( $P=2.8E-09$ ) and "Diabetes Mellitus, Type 2" ( $P=1.1E-08$ ). MetaCore produced also significant enrichment results when we submitted the full set of MT-nDNA 109 candidate genes in association with diseases: "Nutrition Disorders" ( $P=5.7E-40$ ); "Depressive Disorder" ( $P=3.9E-37$ ) and "Pituitary Diseases" ( $P=1.3E-36$ ); and in GO Processes with "Chemical homeostasis" ( $P=9.2E-19$ ).

## 9. Biological Functional Annotations

A number of databases such as NCBI gene and dbSNP, UCSC browser, Genecards, 1000 Genomes, GWAS Catalog, Haploreg, RegulomeDB, GTEx, GeneGO, Literature Lab were used for annotating our results. The following software were used for MT-nDNA SNV - gene expression regulation analysis, NCBI Entrez gene ([ncbi.nlm.nih.gov/gene/](http://ncbi.nlm.nih.gov/gene/)), dbSNP ([ncbi.nlm.nih.gov/snp/](http://ncbi.nlm.nih.gov/snp/)), HaploReg<sup>54</sup>, RegulomeDB<sup>55</sup> and GTEx ([gtexportal.org](http://gtexportal.org)). We performed enrichment analyses via software: GeneGO ([portal.genego.com](http://portal.genego.com)) and Literature Lab ([acumenta.com](http://acumenta.com)).

---

The annotation used for the biological inference work were sourced from NCBI dbSNP build 138 (HG19) during the analyses, and updated to dbSNP build 150 (HG38). The importance of the new candidate SNVs / gene lists identified in Tables 1-4 and Tables S6, S8-S9, were mined by means of four methods: enrichment analysis, protein- protein interactions (PPI), analytical gene expression cis-regulation, and analytical gene expression trans-regulation.

The GeneGO/MetaCore ([http://thomsonreuters.com/products\\_services/science/systems-biology/](http://thomsonreuters.com/products_services/science/systems-biology/)), and Literature Lab of ACUMENTA (<http://acumenta.com/>) software, (accessed on 11.05. 2017) were used for enrichment analysis. We tested if MT-nDNA genes were significantly enriched among pre-specified gene sets defined in pathways, or by shared roles in particular diseases or biological processes from Gene Ontology. The GeneGO, enrichment analysis consists of matching unique gene symbols of possible targets for the "common", "similar" and "unique" sets with gene symbols in functional ontologies in MetaCore. The probability of a random intersection between a set of gene symbols the size of target list with ontology entities is estimated in p-value of hypergeometric intersection. The lower p-value means higher relevance of the entity to the dataset, which shows in higher rating for the entity.

Literature Lab is a data mining software that searches experimentally-derived gene lists with matches from the scientific literature in a curated vocabulary of 24,000 biological and biochemical terms. It employs statistical and clustering analysis on over 17.5 million PubMed abstracts (from 01/01/1990 to the present) to identify pathways (809 pathways), diseases, compounds, cell biology and other areas of biology and biochemistry. The analysis engine compares statistically the submitted gene set to 1,000 random gene sets generated in the analysis to identify term relationships that are associated with the gene set more than by chance alone.

Furthermore, MT-nDNA candidate SNVs were questioned if they reside in any of regulatory marks, analyzing information from ENCODE and ROADMAP initiatives as summarized by HaploReg (<http://www.broadinstitute.org/mammals/haploreg/haploreg.php>)<sup>56</sup> and RegulomeDB (<http://regulome.stanford.edu/>)<sup>57</sup>.

HaploReg (v.4.1) queries were used to capture functional annotations including the chromatin state segmentation of Ernst et al.<sup>56</sup> and chromatin state segmentation on the Roadmap reference epigenomes, conserved regions by GERP and SiPhy, the narrow peaks called by the ENCODE project on DNase hypersensitivity experiments, and the SPP narrow peaks called by the ENCODE project on ChIP-seq experiments. HaploReg team has used RefSeq genes from the UCSC Genome Browser and GENCODE for annotation. BEDTools were used to calculate the proximity of each variant to a gene by either annotation, as well as the orientation (3' or 5') relative to the nearest end of the gene, based on the strand of the gene. This software was accessed on 11.05.2017 (Table S9).

RegulomeDB was used to summarize the following data types, transcription factor binding sites, ChIP factors: 740 unique data sets including most recent ENCODE data release<sup>55,58</sup>.

RegulomeDB uses the Position-Weight Matrix for TF binding, and databases JASPAR CORE, TRANSFAC and UniPROBE<sup>59</sup>. For the DNase sensitivity it uses 204 unique datasets including most recent ENCODE data release (ENCODE Project Consortium). For the Chromatin States, RegulomeDB extracts information from Roadmap Epigenome Consortium from 127 standard epigenomes. Further, RegulomeDB reports eQTLs from several tissue types and also reports DNase footprinting<sup>57,60</sup>, differentially methylated regions<sup>61</sup>, manually curated regions and validated functional SNVs. RegulomeDB produces a ranking score in which smaller values are

---

better. RegulomeDB scoring has classes defined as 1b, 1d and 1f: likely to affect binding and linked to expression of a gene target as: 1b (eQTL + TF binding + any motif + DNase footprint + DNase peak); 1d (eQTL + TF binding + any motif + DNase peak); 1f (eQTL + TF binding/DNase peak), 2a and 2b: likely to affect binding, 3a: less likely to affect binding, 4, 5, and 6: minimal binding evidence, and 7: no data. This software was accessed on 11.05.2017 (Table S9).

We also gathered evidence for eQTLs based on GTExportal.org, GRASP software and special gene expression reported results (Westra <sup>62</sup>, Lappalainen 2013 <sup>63</sup>) (Table S10). We used also GTEx and Protein Atlas (proteinalas.org) for gene expression profiles of mtDNA genes (Figure S13).

GWAS3D (<http://jjwanglab.org/gwas3d>)<sup>64</sup> an online software was used to analyze genetic variants that could affect regulatory elements, by integrating annotations from cell type-specific chromatin states, epigenetic modifications, sequence motifs and cross-species conservation. The regulatory elements are inferred from the genome-wide chromosome interaction data, chromatin marks in 16 different cell types measured by high-throughput chromosome conformation capture technologies (5C, ChIA-PET and Hi-C) from the ENCODE project, Gene Expression Omnibus (GEO) database, published resources and 73 regulatory factor motifs from the Encyclopedia of DNA Element project (Figures S12.1-S12.3). This software was accessed on 01.10.2017.

The importance of novel MT candidate genes were evaluated via protein-protein interactions (PPI) of databases BIND (<http://bind.ca>), BioGrid (<http://thebiogrid.org/>), EcoCyc (<http://www.ecocyc.org>) and HPRD (<http://www.hprd.org/>) as summarized by NCBI (<ftp://ftp.ncbi.nih.gov/gene/GeneRIF/>) (accessed on 02.11. 2018). The PPI is a topological summary of all known or predicted protein interactions, based on stable physical associations, transient binding, substrate chaining, information relay, sourced from curated experimental data of biochemical, biophysical and genetic techniques, and predicted computationally. The importance of candidate gene list based on PPI was evaluated using igraph package (<http://igraph.org>)<sup>65</sup>. The network was built using our programs in SAS, to a Pajek format and imported into igraph in R language. “Google” PageRank algorithm that evaluates the importance of pages/genes in a network was also implemented by igraph<sup>66</sup>. The graph figure of this network is not reported, because it is a very large network.

Because in our study sample sizes per mtDNA marker, were variable and quite often small, we did not address the association of significant markers by gender, which future studies such as TopMed initiative of NHLBI with full sequencing of nDNA and mtDNA may deem it appropriate to contribute in the future.

---

## 4. References

1. Heinemann, L. Insulin assay standardization: leading to measures of insulin sensitivity and secretion for practical clinical care: response to Staten et al. *Diabetes Care* **33**, e83; author reply e84 (2010).
2. Beasley, T.M., Erickson, S. & Allison, D.B. Rank-based inverse normal transformations are increasingly used, but are they merited? *Behav Genet* **39**, 580-95 (2009).
3. Bandelt, H.J., Kloss-Brandstatter, A., Richards, M.B., Yao, Y.G. & Logan, I. The case for the continuing use of the revised Cambridge Reference Sequence (rCRS) and the standardization of notation in human mitochondrial DNA studies. *J Hum Genet* **59**, 66-77 (2014).
4. Anderson, S. et al. Sequence and organization of the human mitochondrial genome. *Nature* **290**, 457-65 (1981).
5. Andrews, R.M. et al. Reanalysis and revision of the Cambridge reference sequence for human mitochondrial DNA. *Nat Genet* **23**, 147 (1999).
6. Ingman, M., Kaessmann, H., Paabo, S. & Gyllensten, U. Mitochondrial genome variation and the origin of modern humans. *Nature* **408**, 708-13 (2000).
7. Behar, D.M. et al. A "Copernican" reassessment of the human mitochondrial DNA tree from its root. *Am J Hum Genet* **90**, 675-84 (2012).
8. Kearse, M. et al. Geneious Basic: an integrated and extendable desktop software platform for the organization and analysis of sequence data. *Bioinformatics* **28**, 1647-9 (2012).
9. Purcell, S. et al. PLINK: a tool set for whole-genome association and population-based linkage analyses. *Am J Hum Genet* **81**, 559-75 (2007).
10. Chang, C.C. et al. Second-generation PLINK: rising to the challenge of larger and richer datasets. *Gigascience* **4**, 7 (2015).
11. O'Connell, J. et al. A general approach for haplotype phasing across the full spectrum of relatedness. *PLoS Genet* **10**, e1004234 (2014).
12. Delaneau, O., Marchini, J., Genomes Project, C. & Genomes Project, C. Integrating sequence and array data to create an improved 1000 Genomes Project haplotype reference panel. *Nat Commun* **5**, 3934 (2014).
13. Howie, B., Marchini, J. & Stephens, M. Genotype imputation with thousands of genomes. *G3 (Bethesda)* **1**, 457-70 (2011).
14. Winkler, T.W. et al. Quality control and conduct of genome-wide association meta-analyses. *Nat Protoc* **9**, 1192-212 (2014).
15. Liu, C., Dupuis, J., Larson, M.G. & Levy, D. Association testing of the mitochondrial genome using pedigree data. *Genet Epidemiol* **37**, 239-47 (2013).
16. Willer, C.J., Li, Y. & Abecasis, G.R. METAL: fast and efficient meta-analysis of genomewide association scans. *Bioinformatics* **26**, 2190-1 (2010).
17. Morgenthaler, S. & Thilly, W.G. A strategy to discover genes that carry multi-allelic or mono-allelic risk for common diseases: a cohort allelic sums test (CAST). *Mutat Res* **615**, 28-56 (2007).
18. Li, B. & Leal, S.M. Methods for detecting associations with rare variants for common diseases: application to analysis of sequence data. *Am J Hum Genet* **83**, 311-21 (2008).
19. Wu, M.C. et al. Rare-variant association testing for sequencing data with the sequence kernel association test. *Am J Hum Genet* **89**, 82-93 (2011).
20. Hudson, G., Gomez-Duran, A., Wilson, I.J. & Chinnery, P.F. Recent mitochondrial DNA mutations increase the risk of developing common late-onset human diseases. *PLoS Genet* **10**, e1004369 (2014).
21. Fetterman, J.L. et al. Relations of mitochondrial genetic variants to measures of vascular function. *Mitochondrion* (2017).

- 
22. Mitchell, S.L. *et al.* Investigating the relationship between mitochondrial genetic variation and cardiovascular-related traits to develop a framework for mitochondrial phenome-wide association studies. *BioData Min* **7**, 6 (2014).
  23. Calvo, S.E., Clauser, K.R. & Mootha, V.K. MitoCarta2.0: an updated inventory of mammalian mitochondrial proteins. *Nucleic Acids Res* **44**, D1251-7 (2016).
  24. Pagliarini, D.J. *et al.* A mitochondrial protein compendium elucidates complex I disease biology. *Cell* **134**, 112-23 (2008).
  25. Lu, H., Koshkin, V., Allister, E.M., Gyulhandanyan, A.V. & Wheeler, M.B. Molecular and metabolic evidence for mitochondrial defects associated with beta-cell dysfunction in a mouse model of type 2 diabetes. *Diabetes* **59**, 448-59 (2010).
  26. Smith, A.C. & Robinson, A.J. MitoMiner v3.1, an update on the mitochondrial proteomics database. *Nucleic Acids Res* **44**, D1258-61 (2016).
  27. Speliotes, E.K. *et al.* Association analyses of 249,796 individuals reveal 18 new loci associated with body mass index. *Nat Genet* **42**, 937-48 (2010).
  28. Yang, J. *et al.* FTO genotype is associated with phenotypic variability of body mass index. *Nature* **490**, 267-72 (2012).
  29. Berndt, S.I. *et al.* Genome-wide meta-analysis identifies 11 new loci for anthropometric traits and provides insights into genetic architecture. *Nat Genet* **45**, 501-12 (2013).
  30. Randall, J.C. *et al.* Sex-stratified genome-wide association studies including 270,000 individuals show sexual dimorphism in genetic loci for anthropometric traits. *PLoS Genet* **9**, e1003500 (2013).
  31. Monda, K.L. *et al.* A meta-analysis identifies new loci associated with body mass index in individuals of African ancestry. *Nat Genet* **45**, 690-6 (2013).
  32. Locke, A.E. *et al.* Genetic studies of body mass index yield new insights for obesity biology. *Nature* **518**, 197-206 (2015).
  33. Shungin, D. *et al.* New genetic loci link adipose and insulin biology to body fat distribution. *Nature* **518**, 187-196 (2015).
  34. Ng, M.C.Y. *et al.* Discovery and fine-mapping of adiposity loci using high density imputation of genome-wide association studies in individuals of African ancestry: African Ancestry Anthropometry Genetics Consortium. *PLoS Genet* **13**, e1006719 (2017).
  35. Justice, A.E. *et al.* Genome-wide meta-analysis of 241,258 adults accounting for smoking behaviour identifies novel loci for obesity traits. *Nat Commun* **8**, 14977 (2017).
  36. Heid, I.M. *et al.* Meta-analysis identifies 13 new loci associated with waist-hip ratio and reveals sexual dimorphism in the genetic basis of fat distribution. *Nat Genet* **42**, 949-60 (2010).
  37. Graff, M. *et al.* Genome-wide physical activity interactions in adiposity - A meta-analysis of 200,452 adults. *PLoS Genet* **13**, e1006528 (2017).
  38. Saxena, R. *et al.* Genetic variation in GIPR influences the glucose and insulin responses to an oral glucose challenge. *Nat Genet* **42**, 142-8 (2010).
  39. Dupuis, J. *et al.* New genetic loci implicated in fasting glucose homeostasis and their impact on type 2 diabetes risk. *Nat Genet* **42**, 105-16 (2010).
  40. Manning, A.K. *et al.* A genome-wide approach accounting for body mass index identifies genetic variants influencing fasting glycemic traits and insulin resistance. *Nat Genet* **44**, 659-69 (2012).
  41. Scott, R.A. *et al.* Large-scale association analyses identify new loci influencing glycemic traits and provide insight into the underlying biological pathways. *Nat Genet* **44**, 991-1005 (2012).
  42. Prokopenko, I. *et al.* A central role for GRB10 in regulation of islet function in man. *PLoS Genet* **10**, e1004235 (2014).

- 
43. Strawbridge, R.J. *et al.* Genome-wide association identifies nine common variants associated with fasting proinsulin levels and provides new insights into the pathophysiology of type 2 diabetes. *Diabetes* **60**, 2624-34 (2011).
  44. Walford, G.A. *et al.* Genome-Wide Association Study of the Modified Stumvoll Insulin Sensitivity Index Identifies BCL2 and FAM19A2 as Novel Insulin Sensitivity Loci. *Diabetes* **65**, 3200-11 (2016).
  45. Soranzo, N. *et al.* Common variants at 10 genomic loci influence hemoglobin A(1)(C) levels via glycemic and nonglycemic pathways. *Diabetes* **59**, 3229-39 (2010).
  46. Wheeler, E. *et al.* Impact of common genetic determinants of Hemoglobin A1c on type 2 diabetes risk and diagnosis in ancestrally diverse populations: A transethnic genome-wide meta-analysis. *PLoS Med* **14**, e1002383 (2017).
  47. Tuppen, H.A., Blakely, E.L., Turnbull, D.M. & Taylor, R.W. Mitochondrial DNA mutations and human disease. *Biochim Biophys Acta* **1797**, 113-28 (2010).
  48. Newmeyer, D.D. & Ferguson-Miller, S. Mitochondria: releasing power for life and unleashing the machineries of death. *Cell* **112**, 481-90 (2003).
  49. Starkov, A.A. The role of mitochondria in reactive oxygen species metabolism and signaling. *Ann N Y Acad Sci* **1147**, 37-52 (2008).
  50. Tseng, A.H., Wu, L.H., Shieh, S.S. & Wang, D.L. SIRT3 interactions with FOXO3 acetylation, phosphorylation and ubiquitinylation mediate endothelial cell responses to hypoxia. *Biochem J* **464**, 157-68 (2014).
  51. Farmer, S.R. The forkhead transcription factor Foxo1: a possible link between obesity and insulin resistance. *Mol Cell* **11**, 6-8 (2003).
  52. Armoni, M. *et al.* FOXO1 represses peroxisome proliferator-activated receptor-gamma1 and -gamma2 gene promoters in primary adipocytes. A novel paradigm to increase insulin sensitivity. *J Biol Chem* **281**, 19881-91 (2006).
  53. Peserico, A. *et al.* A novel AMPK-dependent FoxO3A-SIRT3 intramitochondrial complex sensing glucose levels. *Cell Mol Life Sci* **70**, 2015-29 (2013).
  54. Ward, L.D. & Kellis, M. HaploReg: a resource for exploring chromatin states, conservation, and regulatory motif alterations within sets of genetically linked variants. *Nucleic Acids Res* **40**, D930-4 (2012).
  55. Xie, D. *et al.* Dynamic trans-acting factor colocalization in human cells. *Cell* **155**, 713-24 (2013).
  56. Ernst, J. *et al.* Mapping and analysis of chromatin state dynamics in nine human cell types. *Nature* **473**, 43-9 (2011).
  57. Boyle, A.P. *et al.* Annotation of functional variation in personal genomes using RegulomeDB. *Genome Res* **22**, 1790-7 (2012).
  58. Boyle, A.P. *et al.* Comparative analysis of regulatory information and circuits across distant species. *Nature* **512**, 453-6 (2014).
  59. Jolma, A. *et al.* DNA-binding specificities of human transcription factors. *Cell* **152**, 327-39 (2013).
  60. Degner, J.F. *et al.* DNase I sensitivity QTLs are a major determinant of human expression variation. *Nature* **482**, 390-4 (2012).
  61. Kuleshov, V. *et al.* Whole-genome haplotyping using long reads and statistical methods. *Nat Biotechnol* **32**, 261-6 (2014).
  62. Westra, H.J. *et al.* Systematic identification of trans eQTLs as putative drivers of known disease associations. *Nat Genet* **45**, 1238-43 (2013).
  63. Lappalainen, T. *et al.* Transcriptome and genome sequencing uncovers functional variation in humans. *Nature* **501**, 506-11 (2013).



- 
64. Li, M.J., Wang, L.Y., Xia, Z., Sham, P.C. & Wang, J. GWAS3D: Detecting human regulatory variants by integrative analysis of genome-wide associations, chromosome interactions and histone modifications. *Nucleic Acids Res* **41**, W150-8 (2013).
  65. Csardi, G. & Nepusz, T. The igraph software package for complex network research, *InterJournal, Complex Systems* 1695. (2006).
  66. Networks, Crowds, and Markets. Reasoning about a Highly Connected World. David Easley and Jon Kleinberg. Cambridge University Press. 351-383 (2010).

## 5. CHARGEmtDNA+ Study Acknowledgments

| Study                                                               | Acknowledgment                                                                                                                                                                                                                                                                                                                                                                                                                                                                                                                                                                                                                                                                                                                                                                                                                                                                                                                                                                                                                                                                                                                                                                                                                                                                                                                                                                                                                                                                                                                                                                                                                                                                                                              |
|---------------------------------------------------------------------|-----------------------------------------------------------------------------------------------------------------------------------------------------------------------------------------------------------------------------------------------------------------------------------------------------------------------------------------------------------------------------------------------------------------------------------------------------------------------------------------------------------------------------------------------------------------------------------------------------------------------------------------------------------------------------------------------------------------------------------------------------------------------------------------------------------------------------------------------------------------------------------------------------------------------------------------------------------------------------------------------------------------------------------------------------------------------------------------------------------------------------------------------------------------------------------------------------------------------------------------------------------------------------------------------------------------------------------------------------------------------------------------------------------------------------------------------------------------------------------------------------------------------------------------------------------------------------------------------------------------------------------------------------------------------------------------------------------------------------|
| <b>AIRWAVE</b>                                                      | We thank all participants in the Airwave Health Monitoring Study. The Study is funded by the Home Office (grant number 780-TETRA) with additional support from the National Institute for Health Research (NIHR), Imperial College Healthcare NHS Trust (ICHNT) and Imperial College Biomedical Research Centre (BRC). P.E. acknowledges support from the ICHNT and Imperial College BRC, the MRC-PHE Centre for Environment and Health (MR/L01341X/1), and the NIHR Health Protection Research Unit on Health Impact of Environmental Hazards (HPRU-2012-10141). This work used the computing resources of the UK MEDical BIOinformatics partnership programme (UK MED-BIO) (MR/L01632X/1). This work was supported by the UK Dementia Research Institute which receives its funding from UK DRI Ltd funded by the UK Medical Research Council, Alzheimer’s Society and Alzheimer’s Research UK.                                                                                                                                                                                                                                                                                                                                                                                                                                                                                                                                                                                                                                                                                                                                                                                                                           |
| <b>ALSPAC (The Avon Longitudinal Study of Parents and Children)</b> | We are extremely grateful to all the families who took part in this study, the midwives for their help in recruiting them, and the whole ALSPAC team, which includes interviewers, computer and laboratory technicians, clerical workers, research scientists, volunteers, managers, receptionists and nurses. The UK Medical Research Council and the Wellcome Trust (Grant ref: 102215/2/13/2) and the University of Bristol provide core support for ALSPAC. GWAS data was generated by Sample Logistics and Genotyping Facilities at the Wellcome Trust Sanger Institute and LabCorp (Laboratory Corporation of America) using support from 23andMe.                                                                                                                                                                                                                                                                                                                                                                                                                                                                                                                                                                                                                                                                                                                                                                                                                                                                                                                                                                                                                                                                    |
| <b>ARIC (The Atherosclerosis Risk in Communities Study)</b>         | The ARIC study is a population-based cohort study designed to study new and established risk factors for atherosclerosis and community trends in coronary heart disease. In 1987-89, baseline data was collected on 15,792 adults, aged 45–64 y, living in four U.S. communities (Forsyth County, NC; Jackson, MS; northwest Minneapolis suburbs, MN; Washington County, MD). The baseline exam was conducted in 1987-89 and information was collected on African Americans, Caucasians, and a few adults of other ethnicities, aged 45–64 y. After providing informed consent, 15,792 adults were enrolled (8,710 women and 7,082 men). Up to 8,591, Caucasian adults with available DNA, valid dietary information, and consent to share genetic data were eligible for the current analysis. The Atherosclerosis Risk In Communities (ARIC) Study is carried out as a collaborative study supported by National Heart, Lung, and Blood Institute contracts (HHSN268201100005C, HHSN268201100006C, HHSN268201100007C, HHSN268201100008C, HHSN268201100009C, HHSN268201100010C, HHSN268201100011C, and HHSN268201100012C), R01HL087641, R01HL59367 and R01HL086694; National Human Genome Research Institute contract U01HG004402; and National Institutes of Health contract HHSN268200625226C. The authors thank the staff and participants of the ARIC study for their important contributions. Infrastructure was partly supported by Grant Number UL1RR025005, a component of the National Institutes of Health and NIH Roadmap for Medical Research. Dr. Nettleton is supported by a K01 from the National Institutes of Health, National Institute of Diabetes and Digestive and Kidney Diseases (5K01DK082729-04). |
| <b>Danish: The 1936 Birth Cohort / 60 Years</b>                     | The collection of the cohort was financially supported by The Danish Heart Foundation and The Danish Medical Research Council. The authors are grateful to the staff at the Centre of Preventive Medicine, and to MD, general practitioner, Professor Hanne Hollnagel Dr Med. Sci., who initiated the study of the 1936 cohort.                                                                                                                                                                                                                                                                                                                                                                                                                                                                                                                                                                                                                                                                                                                                                                                                                                                                                                                                                                                                                                                                                                                                                                                                                                                                                                                                                                                             |

|                              |                                                                                                                                                                                                                                                                                                                                                                                                                                                                                                                                                                                                                                                                                                                                                                                                                                                                                                                                                                                                                                                                                                                  |
|------------------------------|------------------------------------------------------------------------------------------------------------------------------------------------------------------------------------------------------------------------------------------------------------------------------------------------------------------------------------------------------------------------------------------------------------------------------------------------------------------------------------------------------------------------------------------------------------------------------------------------------------------------------------------------------------------------------------------------------------------------------------------------------------------------------------------------------------------------------------------------------------------------------------------------------------------------------------------------------------------------------------------------------------------------------------------------------------------------------------------------------------------|
| <b>Danish: Addition-Pro</b>  | The ADDITION-PRO study was funded by an unrestricted grant from the European Foundation for the Study of Diabetes/Pfizer for Research into Cardiovascular Disease Risk Reduction in Patients with Diabetes (74550801), the Danish Council for Strategic Research, internal research and equipment funds from Steno Diabetes Center and supported by research grants from the Novo Nordisk Foundation. The ADDITION-PRO study is managed by the ADDITION-DK steering committee (Torsten Lauritzen, Knut Borch-Johnsen, Anneli Sandbæk, Marit E. Jørgensen, and Daniel Witte).                                                                                                                                                                                                                                                                                                                                                                                                                                                                                                                                     |
| <b>Danish: Cogen</b>         | The Copenhagen Cardiovascular Genetic study (COGEN) is a biobank that has collected superfluous whole blood from patients admitted to six cardiology departments in the greater region of Copenhagen from 2010-2017. COGEN currently contains samples from ~80,000 individuals. Due to a Danish permanent identification number (given to all permanent residents), these data can be linked with various clinical databases at an individual level. The present study population is comprised of individuals who have had at least one coronary angiogram performed between 2010-2014. Data on the angiograms were collected from the Eastern Danish Heart Registry, which is a clinical database, where information on demographics (e.g. age, sex), risk factors and comorbidities (e.g., smoking status, diabetes) has been routinely entered on all patients in the Eastern region of Denmark. All data were de-identified prior to analyses. The ethics committee of Region North Jutland (N-20140048) approved the project and COGEN has permission from the Data Protection Agency (00916 GEH-2010-001). |
| <b>Danish: Goya</b>          | The GOYA study was conducted as part of the activities of the Danish Obesity Research Centre (DanORC, <a href="http://www.danorc.dk">www.danorc.dk</a> ) and the MRC centre for Causal Analyses in Translational Epidemiology (MRC CAiTE), and genotyping was funded by the Wellcome Trust (WT 084762MA). GOYA is a nested study within The Danish National Birth Cohort which was established with major funding from the Danish National Research Foundation. Additional support for this cohort has been obtained from the Pharmacy Foundation, the Egmont Foundation, The March of Dimes Birth Defects Foundation, the Augustinus Foundation, and the Health Foundation.                                                                                                                                                                                                                                                                                                                                                                                                                                     |
| <b>Danish: Health2006</b>    | The Health2006 study was financially supported by grants from the Velux Foundation; the Danish Medical Research Council, Danish Agency for Science, Technology and Innovation; the Aase and Ejner Danielsens Foundation; ALK-Abelló A/S (Hørsholm, Denmark), Timber Merchant Vilhelm Bangs Foundation, MEKOS Laboratories (Denmark) and Research Centre for Prevention and Health, the Capital Region of Denmark.                                                                                                                                                                                                                                                                                                                                                                                                                                                                                                                                                                                                                                                                                                |
| <b>Danish: Inter99</b>       | The Inter99 study is funded by The Danish Medical Research Council, The Danish Centre for Evaluation and Health Technology Assessment, Novo Nordisk, Copenhagen County, The Danish Heart Foundation, The Danish Pharmaceutical Association, Augustinus foundation, Ib Henriksen foundation and Becket foundation. The staff from Research Centre for Prevention and Health, The capital region, Glostrup, Denmark is acknowledged their effort in making the Inter99 study possible. The Novo Nordisk Foundation Center for Basic Metabolic Research is an independent Research Center at the University of Copenhagen partially funded by an unrestricted donation from the Novo Nordisk Foundation ( <a href="http://www.metabol.ku.dk">www.metabol.ku.dk</a> ).                                                                                                                                                                                                                                                                                                                                               |
| <b>Danish: Vejle Biobank</b> | The project was funded by the Danish Council for Independent Research/Medical Sciences, the Research Council of Vejle Hospital, the Department of Internal Medicine, Vejle Hospital, Vejle County, the Danish Research Fund, the Lions Club International Denmark, and anonymous donations. The authors would like to thank the laboratory technologists engagement and dedicated work.                                                                                                                                                                                                                                                                                                                                                                                                                                                                                                                                                                                                                                                                                                                          |
| <b>EPIC-InterAct</b>         | We thank all EPIC participants and staff for their contribution to the EPIC-InterAct study. Funding for the EPICInterAct project was provided by the EU FP6 programme (LSHM_CT_2006_037197).                                                                                                                                                                                                                                                                                                                                                                                                                                                                                                                                                                                                                                                                                                                                                                                                                                                                                                                     |

|                                                                        |                                                                                                                                                                                                                                                                                                                                                                                                                                                                                                                                                                                                        |
|------------------------------------------------------------------------|--------------------------------------------------------------------------------------------------------------------------------------------------------------------------------------------------------------------------------------------------------------------------------------------------------------------------------------------------------------------------------------------------------------------------------------------------------------------------------------------------------------------------------------------------------------------------------------------------------|
| <b>EPIC-Norfolk</b>                                                    | EPIC-Norfolk is supported by programme grants from the Medical Research Council UK (G1000143) and Cancer Research UK (C864/A14136) and with additional support from the European Union, Stroke Association, British Heart Foundation, Research into Ageing, Department of Health, The Wellcome Trust and the Food Standards Agency. NJW and CL also acknowledge support from the Medical Research Council, UK (MC_UU_12015/1; MC_PC_13048). We thank all EPIC participants and staff for their contribution to the study, and the laboratory teams at the MRC Epidemiology Unit for sample management. |
| <b>FAMHS (Family Heart Study)</b>                                      | This research was conducted using data and resources from the NHLBI Family Heart Study and Washington University School of Medicine. This work was partially supported by the NIDDK R01DK089256 and NHLBI R01HL117078. We would also like to thank the families that participated in the Family Heart Study.                                                                                                                                                                                                                                                                                           |
| <b>Fenland Study</b>                                                   | The Fenland Study is funded by the Wellcome Trust and the Medical Research Council (MC_U106179471). We are grateful to all the volunteers for their time and help, and to the General Practitioners and practice staff for assistance with recruitment. We thank the Fenland Study Investigators, Fenland Study Co-ordination team and the Epidemiology Field, Data and Laboratory teams. We further acknowledge support from the Medical research council (MC_UU_12015/1).                                                                                                                            |
| <b>FHS (Framingham Heart Study)</b>                                    | The Framingham Heart Study is funded by National Institutes of Health contract N01-HC-25195. This work is also supported by National Institute for Diabetes and Digestive and Kidney Diseases (NIDDK) U01 DK078616 and NIDDK K24 DK080140. In addition, analysis of FHS data and meta-analysis of the consortium's data supported by NHLBI intramural research funding. The NHLBI grant R01 HL105756 contributed in the CHARGE infrastructure making possible the Working Group collaborations.                                                                                                        |
| <b>GeneSTAR (Genetic Study of Atherosclerosis Risk)</b>                | GeneSTAR was supported by grants from the National Institutes of Health/National Heart, Lung, and Blood Institute (U01 HL72518, HL087698, HL49762, HL59684, HL58625, HL071025, and HL092165), National Institutes of Health/National Institute of Nursing Research (NR0224103 and NR008153), National Institutes of Health/National Institute of Neurological Disorders and Stroke (NS062059), and by a grant from the National Institutes of Health/National Center for Research Resources (M01-RR000052) to the Johns Hopkins General Clinical Research Center.                                      |
| <b>GENOA (Genetic Epidemiology Network of Arteriopathy)</b>            | Funding: This work was supported by United States Public Health Service Grants from the National Institutes of Health (K23 DK78229, R01 DK73537 and R01 HL 87660).                                                                                                                                                                                                                                                                                                                                                                                                                                     |
| <b>GOLDN (Genetics of Lipid Lowering Drugs and Diet Network Study)</b> | GOLDN authors wish to thank all of the families who contributed to the study and all investigators who participated in this effort. GOLDN participants were recruited and phenotyped under NIH National Heart, Lung and Blood Institute (NHLBI) grant U01HL072524. Genome-wide common variant data were collected under NHLBI grant R01091357. Genome-wide methylation data were collected under NHLBI grant R01104135.                                                                                                                                                                                |

|                                                                                         |                                                                                                                                                                                                                                                                                                                                                                                                                                                                                                                                                                                                                                                                                                                                                                                                                                                                                                                                                                                                                                                                                                                                                                                                                                                                                                                                                                                                                                                                                                                                                                                                                                                                                                                                                                 |
|-----------------------------------------------------------------------------------------|-----------------------------------------------------------------------------------------------------------------------------------------------------------------------------------------------------------------------------------------------------------------------------------------------------------------------------------------------------------------------------------------------------------------------------------------------------------------------------------------------------------------------------------------------------------------------------------------------------------------------------------------------------------------------------------------------------------------------------------------------------------------------------------------------------------------------------------------------------------------------------------------------------------------------------------------------------------------------------------------------------------------------------------------------------------------------------------------------------------------------------------------------------------------------------------------------------------------------------------------------------------------------------------------------------------------------------------------------------------------------------------------------------------------------------------------------------------------------------------------------------------------------------------------------------------------------------------------------------------------------------------------------------------------------------------------------------------------------------------------------------------------|
| <p><b>HCHS-SOL (The Hispanic Community Health Study/Study of Latinos)</b></p>           | <p>The Hispanic Community Health Study/Study of Latinos is a collaborative study supported by contracts from the National Heart, Lung, and Blood Institute (NHLBI) to the University of North Carolina (HHSN268201300001I / N01-HC-65233), University of Miami (HHSN268201300004I / N01-HC-65234), Albert Einstein College of Medicine (HHSN268201300002I / N01-HC-65235), University of Illinois at Chicago – HHSN268201300003I / N01-HC-65236 Northwestern University), and San Diego State University (HHSN268201300005I / N01-HC-65237). The following Institutes/Centers/Offices have contributed to the HCHS/SOL through a transfer of funds to the NHLBI: National Institute on Minority Health and Health Disparities, National Institute on Deafness and Other Communication Disorders, National Institute of Dental and Craniofacial Research, National Institute of Diabetes and Digestive and Kidney Diseases, National Institute of Neurological Disorders and Stroke, NIH Institution-Office of Dietary Supplements. The Genetic Analysis Center at the University of Washington was supported by NHLBI and NIDCR contracts (HHSN268201300005C AM03 and MOD03). Additional analysis support was provided by NIDDK grant 1R01DK101855-01, NHLBI grant N01HC65233, and AHA grant 13GRNT16490017. Genotyping efforts were supported by the NIH Department of Health and Human Services (HSN26220/20054C), National Center for Advancing Translational Science Clinical Translational Science Institute (UL1TR001881), and NIDDK Diabetes Research Center (DK063491). This manuscript has been reviewed by the HCHS/SOL Publications Committee for scientific content and consistency of data interpretation with previous HCHS/SOL publications.</p> |
| <p><b>HYPERGEN (Hypertension Genetic Epidemiology Network)</b></p>                      | <p>We thank all individuals who participated in the Hypertension Genetic Epidemiology Network study. The HyperGEN study is funded by cooperative agreements (U10) with NHLBI: HL54471, HL54472, HL54473, HL54495, HL54496, HL54497, HL54509, HL54515, and 2 R01 HL55673-12. The study involves: University of Utah: (Network Coordinating Center, Field Center, and Molecular Genetics Lab); Univ. of Alabama at Birmingham: (Field Center and Echo Coordinating and Analysis Center); Medical College of Wisconsin: (Echo Genotyping Lab); Boston University: (Field Center); University of Minnesota: (Field Center and Biochemistry Lab); University of North Carolina: (Field Center); Washington University: (Data Coordinating Center); Weil Cornell Medical College: (Echo Reading Center); National Heart, Lung, &amp; Blood Institute. For a complete list of HyperGEN Investigators: <a href="http://www.biostat.wustl.edu/hypergen/Acknowledge.html">http://www.biostat.wustl.edu/hypergen/Acknowledge.html</a></p>                                                                                                                                                                                                                                                                                                                                                                                                                                                                                                                                                                                                                                                                                                                                  |
| <p><b>LBC1921 and LBC1936 (Lothian Birth Cohort 1921 Lothian Birth Cohort 1936)</b></p> | <p>Phenotype collection in the Lothian Birth Cohort 1921 was supported by the UK's Biotechnology and Biological Sciences Research Council (BBSRC), The Royal Society and The Chief Scientist Office of the Scottish Government. Phenotype collection in the Lothian Birth Cohort 1936 was supported by Age UK (The Disconnected Mind project). Genotyping was supported by Centre for Cognitive Ageing and Cognitive Epidemiology (Pilot Fund award), Age UK, and the Royal Society of Edinburgh. The work was undertaken by The University of Edinburgh Centre for Cognitive Ageing and Cognitive Epidemiology, part of the cross council Lifelong Health and Wellbeing Initiative (MR/K026992/1). Funding from the BBSRC and Medical Research Council (MRC) is gratefully acknowledged. WDH is supported by a grant from Age UK (Disconnected Mind Project).</p>                                                                                                                                                                                                                                                                                                                                                                                                                                                                                                                                                                                                                                                                                                                                                                                                                                                                                              |
| <p><b>LLFS (Long Life Family Study)</b></p>                                             | <p>We would like to thank the staff and participants of the Long Life Family Study for making this work possible. LLFS was supported by the National Institute on Aging (U01-AG023712, U01-AG23744, U01-AG023746, U01-AG023749, and U01-AG023755).</p>                                                                                                                                                                                                                                                                                                                                                                                                                                                                                                                                                                                                                                                                                                                                                                                                                                                                                                                                                                                                                                                                                                                                                                                                                                                                                                                                                                                                                                                                                                          |
| <p><b>MESA (Multi-Ethnic Study of Atherosclerosis)</b></p>                              | <p>This research, including GWAS and Cardiometabochip genotyping, was supported part by the Multi-Ethnic Study of Atherosclerosis (MESA) contracts HHSN268201500003I, N01-HC-95159, N01-HC-95160, N01-HC-95161, N01-HC-95162, N01-HC-95163, N01-HC-95164, N01-HC-95165, N01-HC-95166, N01-HC-95167, N01-HC-95168, N01-HC-95169, UL1-TR-000040, UL1-TR-001079, and UL1-TR-001420. Funding for MESA Family was provided by grants R01HL071051, R01HL98077, R01HL071205, R01HL071250, R01HL071251, R01HL071258, R01HL071259, P50 ES015915, and by the</p>                                                                                                                                                                                                                                                                                                                                                                                                                                                                                                                                                                                                                                                                                                                                                                                                                                                                                                                                                                                                                                                                                                                                                                                                          |

|                                                                   |                                                                                                                                                                                                                                                                                                                                                                                                                                                                                                                                                                                                                                                                                                                                                                                                                                                                                                                                                                                                                                                             |
|-------------------------------------------------------------------|-------------------------------------------------------------------------------------------------------------------------------------------------------------------------------------------------------------------------------------------------------------------------------------------------------------------------------------------------------------------------------------------------------------------------------------------------------------------------------------------------------------------------------------------------------------------------------------------------------------------------------------------------------------------------------------------------------------------------------------------------------------------------------------------------------------------------------------------------------------------------------------------------------------------------------------------------------------------------------------------------------------------------------------------------------------|
|                                                                   | <p>National Center for Research Resources, and Grant UL1RR033176. Funding for MESA Share genotyping was provided by NHLBI Contract N02-HL-6-4278. The provision of genotyping data was supported in part by the National Center for Advancing Translational Sciences, CTSI grant UL1TR001881, and the National Institute of Diabetes and Digestive and Kidney Disease Diabetes Research (CRC) grant DK063491. Although the research described in this presentation has been funded in part by the United States Environmental Protection Agency through RD831697 to the University of Washington, it has not been subjected to the Agency's required peer and policy review and therefore does not necessarily reflect the views of the Agency and no official endorsement should be inferred.</p>                                                                                                                                                                                                                                                          |
| <p><b>NEO (The Netherlands Epidemiology of Obesity study)</b></p> | <p>The authors of the NEO study thank all individuals who participated in the Netherlands Epidemiology in Obesity study, all participating general practitioners for inviting eligible participants and all research nurses for collection of the data. We thank the NEO study group, Pat van Beelen, Petra Noordijk and Ingeborg de Jonge for the coordination, lab and data management of the NEO study. The genotyping in the NEO study was supported by the Centre National de Génotypage (Paris, France), headed by Jean-Francois Deleuze. The NEO study is supported by the participating Departments, the Division and the Board of Directors of the Leiden University Medical Center, and by the Leiden University, Research Profile Area Vascular and Regenerative Medicine. Diana van Heemst is supported by the European Commission funded project HUMAN (Health-2013-INNOVATION-1-602757). Dennis Mook-Kanamori is supported by Dutch Science Organization (ZonMW-VENI Grant 916.14.023).</p>                                                   |
| <p><b>OOA (The Old Order Amish Study)</b></p>                     | <p>The authors thank Dr. Braxton D. Mitchell and Dr. Alan R. Shuldiner for their contribution in Amish study and the Amish Research Clinic Staff for their great efforts in study subject recruitment and characterization as well as all the volunteers in the Amish community for their participation in these studies. The Amish portion of this study was supported by NIH grants R01 HL121007, U01 HL072515, R01 AG18728, P30 DK072488, and AHA17GRNT33440151.</p>                                                                                                                                                                                                                                                                                                                                                                                                                                                                                                                                                                                     |
| <p><b>PELOTAS (1982 Pelotas (Brazil) Birth Cohort Study)</b></p>  | <p>The 1982 Pelotas Birth Cohort Study is conducted by the Postgraduate Program in Epidemiology at Universidade Federal de Pelotas with the collaboration of the Brazilian Public Health Association (ABRASCO). From 2004 to 2013, the Wellcome Trust supported the study. The International Development Research Center, World Health Organization, Overseas Development Administration, European Union, National Support Program for Centers of Excellence (PRONEX), the Brazilian National Research Council (CNPq), and the Brazilian Ministry of Health supported previous phases of the study. Genotyping of 1982 Pelotas Birth Cohort Study participants was supported by the Department of Science and Technology (DECIT, Ministry of Health) and National Fund for Scientific and Technological Development (FNDCT, Ministry of Science and Technology), Funding of Studies and Projects (FINEP, Ministry of Science and Technology, Brazil), Coordination of Improvement of Higher Education Personnel (CAPES, Ministry of Education, Brazil).</p> |
| <p><b>RS (ROTTERDAM STUDY II &amp; III)</b></p>                   | <p>The RS is supported by the Erasmus MC University Medical Center and Erasmus University Rotterdam; The Netherlands Organization for Scientific Research (NWO); The Netherlands Organization for Health Research and Development (ZonMw); the Research Institute for Diseases in the Elderly (RIDE); The Netherlands Genomics Initiative (NGI); the Ministry of Education, Culture and Science; the Ministry of Health, Welfare and Sports; the European Commission (DG XII); and the Municipality of Rotterdam. The contribution of inhabitants, general practitioners and pharmacists of the Ommoord district to the Rotterdam Study is gratefully acknowledged.</p>                                                                                                                                                                                                                                                                                                                                                                                     |

|                                                                 |                                                                                                                                                                                                                                                                                                                                                                                                                                                                                                                                                                                                                                                                                                                                                                                                                                                                                                                                                                                                                                                                                                                                                       |
|-----------------------------------------------------------------|-------------------------------------------------------------------------------------------------------------------------------------------------------------------------------------------------------------------------------------------------------------------------------------------------------------------------------------------------------------------------------------------------------------------------------------------------------------------------------------------------------------------------------------------------------------------------------------------------------------------------------------------------------------------------------------------------------------------------------------------------------------------------------------------------------------------------------------------------------------------------------------------------------------------------------------------------------------------------------------------------------------------------------------------------------------------------------------------------------------------------------------------------------|
| <b>SHIP (Study of Health In Pomerania)</b>                      | <p>We thank all staff members as well as the genotyping staff involved in the generation of the SNP data. SHIP (Study of Health in Pomerania) and SHIP-TREND both represent population-based studies. SHIP is supported by the German Federal Ministry of Education and Research (Bundesministerium für Bildung und Forschung (BMBF); grants 01ZZ9603, 01ZZ0103, and 01ZZ0403) and the German Research Foundation (Deutsche Forschungsgemeinschaft (DFG); grant GR 1912/5-1). SHIP and SHIP-TREND are part of the Community Medicine Research net (CMR) of the Ernst-Moritz-Arndt University Greifswald (EMAU) which is funded by the BMBF as well as the Ministry for Education, Science and Culture and the Ministry of Labor, Equal Opportunities, and Social Affairs of the Federal State of Mecklenburg-West Pomerania. The CMR encompasses several research projects that share data from SHIP. The University of Greifswald is a member of the Caché Campus program of the InterSystems GmbH. SNP typing of SHIP and SHIP-TREND using the Illumina Infinium HumanExome BeadChip (version v1.0) was supported by the BMBF (grant 03Z1CN22).</p> |
| <b>TUDR (Taiwan-US Diabetic Retinopathy Study)</b>              | <p>This study was supported by the National Eye Institute of the National Institutes of Health (EY014684 to J.I.R. and Y.-D.I.C.) and ARRA Supplement (EY014684-03S1, -04S1), the National Institute of Diabetes and Digestive and Kidney Disease grant DK063491 to the Southern California Diabetes Endocrinology Research Center, the Eye Birth Defects Foundation Inc., the National Science Council, Taiwan (NSC 98-2314-B-075A-002-MY3 to W.H.S.) and the Taichung Veterans General Hospital, Taichung, Taiwan (TCVGH-1003001C to W.H.S. ). DNA handling and genotyping were supported in part by the National Center for Advancing Translational Sciences, CTSI grant UL1TR001881 and the National Institute of Diabetes and Digestive and Kidney Disease Diabetes Research Center (DRC) grant DK063491 to the Southern California Diabetes Endocrinology Research Center.</p>                                                                                                                                                                                                                                                                  |
| <b>WGHS (Women's Genome Health Study)</b>                       | <p>The WGHS is supported by the National Heart, Lung, and Blood Institute (HL043851 and HL080467) and the National Cancer Institute (CA047988 and UM1CA182913), with collaborative scientific support and funding for genotyping provided by Amgen.</p>                                                                                                                                                                                                                                                                                                                                                                                                                                                                                                                                                                                                                                                                                                                                                                                                                                                                                               |
| <b>WHI (The Women's Health Initiative)</b>                      | <p>Funding support for the "Epidemiology of putative genetic variants: The Women's Health Initiative" study is provided through the NHGRI grants HG006292 and HL129132. The WHI program is funded by the National Heart, Lung, and Blood Institute, National Institutes of Health, U.S. Department of Health and Human Services through contracts HHSN268201100046C, HHSN268201100001C, HHSN268201100002C, HHSN268201100003C, HHSN268201100004C, and HHSC271201100004C. The authors thank the WHI investigators and staff for their dedication, and the study participants for making the program possible. A full listing of WHI investigators can be found at <a href="http://www.whiscience.org/publications/WHI_investigators_shortlist.pdf">http://www.whiscience.org/publications/WHI_investigators_shortlist.pdf</a>.</p>                                                                                                                                                                                                                                                                                                                      |
| <b>WUHHD (Washington University Hypertensive Heart Disease)</b> | <p>We thank all individuals who participated in the Washington University Hypertensive Heart Disease Study and to Alan D. Waggoner for his contributions to this study. The WU-HHD study was supported by National Institutes of Health (NIH) Grants R01HL091028, R01HL071782, T32HL083822, R21HL094668, UL1RR024992 and KL2RR024994 (Washington University), and an American Heart Association grant #0855626G. Additional support provided by NIH grant S10RR024532, a grant from the Barnes-Jewish Hospital Foundation, and a Lucille P. Markey Fellowship.</p>                                                                                                                                                                                                                                                                                                                                                                                                                                                                                                                                                                                    |

## **6. CHARGEmtDNA+ Working Group Study Descriptions**

### **AIRWAVE (The Airwave Study)**

The Airwave Health Monitoring Study is a cohort of UK police officers and staff across Great Britain. The study design and rationale have previously been described<sup>1</sup>. Briefly, participants from each force who agreed to participate were enrolled from 2004 either with an enrolment questionnaire or a comprehensive health screening performed locally. At the health screen, the participant also filled out an extensive questionnaire on a touchscreen computer. Both questionnaires include demographic, health and lifestyle questions, and information on TETRA radio usage. The time between the enrolment questionnaire and the health screening was determined by logistic constraints and varied between 6 months and one or more years. As of 31 December 2012, the Airwave Health Monitoring Study had enrolled 42,112 participants. For participating forces, on average, 50% of their employees were recruited once enrolment was complete. Participants signed a consent form permitting use of their data and samples for future research. The study had ethical approval through the National Health Service multi-site research ethics committee (MREC/13/NW/0588).

The individuals were genotyped using Illumina Infinium HumanCoreExome-12 v1.1 BeadChip Array. We extracted 278 mitochondrial markers and updated with latest Cambridge Revised Sequence (rCRS) of the Human MT-DNA positions and were used for haplotype prephasing and imputation. PLINK was used to prepare the data in binary format and 20 variants were excluded due to missing call rates > 0.01. We used SHAPEIT2 for prephasing haplotype scaffold. Imputation was done in one window in the length of the full mitochondrial genome using IMPUTE2 based on the Cosmopolitan 1000 Genomes Phase 3 mitochondrial DNA of 2505 individuals from 26 populations conforming with the rCRS of the Human MT-DNA positions known also as v.5 phase 3 of 1000 Human Genomes HG19, GRCh37 cosmopolitan mitochondrial reference panel (<ftp://1000genomes.ebi.ac.uk/vol1/ftp/>) released in 2016. The final imputed dosage file (after fcGENE converting and filtering) contained 3399 mitochondrial variants for 14,688 subjects. Based on the IMPUTE2 imputation accuracy assessment, the imputation concordance rate between original mitochondrial genotypes and the same imputed ones for Airwave was %98.9. A few heterozygotes in the original data were considered as possible genotyping errors and turned to missing via PLINK.

### **ALSPAC (The Avon Longitudinal Study of Parents and Children)**

ALSPAC is a population-based cohort study investigating genetic and environmental factors that affect the health and development of children. The study methods are described in detail elsewhere<sup>2,3</sup> (<http://www.bristol.ac.uk/alspac>). Briefly, 14,541 pregnant women residents in the former region of Avon, UK, with an expected delivery date between 1<sup>st</sup> April 1991 and 31<sup>st</sup> December 1992, were eligible to take part in ALSPAC. Detailed information and biosamples have been collected on these women and their offspring at regular intervals, which are available through a searchable data dictionary (<http://www.bris.ac.uk/alspac/researchers/data-access/data-dictionary/>).



Written informed consent was obtained for all study participants. Ethical approval for the study was obtained from the ALSPAC Ethics and Law Committee and the Local Research Ethics Committees.

**Genotyping and Imputation:** Genotype data was generated using the Illumina HumanHap550 quad genome-wide SNP genotyping platform (Illumina Inc, San Diego, USA) by the Wellcome Trust Sanger Institute (WTSI, Cambridge, UK) and the Laboratory Corporation of America (LCA, Burlington, NC, USA). Samples were excluded based on incorrect sex assignment; abnormal heterozygosity ( $<0.320$  or  $>0.345$  for WTSI data;  $<0.310$  or  $>0.330$  for LCA data); high missingness ( $>3\%$ ); cryptic relatedness ( $>10\%$  identity by descent) and non-European ancestry (detected by multidimensional scaling analysis).

After QC, 500,527 SNP loci were available for the directly genotype dataset on 8,365 unrelated individuals. Imputation was undertaken using MACH 1.0.16 Markov Chain haplotyping software<sup>4</sup>, using CEPH individuals from phase 2 of the HapMap project (hg18) as a reference set (release 22). All variants were filtered to have Hardy-Weinberg equilibrium  $P > 5 \times 10^{-7}$  and an imputation quality score  $\geq 0.8$  or higher. The positions of the remaining 33 MT markers were updated using the latest MT Cambridge Revised Sequence (rCRS) for Human MT-DNA in preparation for the CHARGE<sub>mtDNA+</sub> working group imputation protocol.

**Phenotypes:** Phenotype data were obtained from various time points in the ALSPAC cohort as some traits were only measured at certain ages in the offspring. At the age 17 clinic (mean age: 17.8, standard deviation: 0.4), height was measured to the nearest 0.1cm using a Harpenden stadiometer (Holtain Crosswell, Dyfed, UK) and weight was measured to the nearest 0.1kg using Tanita electronic scales. Body Mass Index (BMI) was calculated as  $(\text{weight (kg)})/(\text{height (m)})^2$ . At the age 11 clinic (mean age: 11.7, standard deviation: 0.2), waist and hip circumference were measured to the nearest 0.1 centimeter (cm) and used to calculate waist-hip ratio (WHR).

At the age 15 clinic (mean age: 15.5, standard deviation: 0.3), blood samples were obtained from participants who were either asked to fast overnight (for those attending in the morning) or for a minimum of 6 hours for those attending after lunch. Blood samples were immediately spun and frozen at  $-80^{\circ}\text{C}$  and assayed in batches shortly after (3-12 months). Insulin was measured by automated microparticle enzyme immunoassay that does not cross-react with proinsulin and plasma glucose was measured by automated enzymatic. Glucose measurements were obtained by the staff of the Routine Lipids Section of the Biochemistry Department of Glasgow Royal Infirmary using a Hitachi Modular p analyser, (with enzymatic colorimetric assay) and kit supplied by Roche Diagnostics. HbA<sub>1c</sub> was measured at approximately age 10 (mean age: 10.1, standard deviation: 0.4) from non-fasting venous whole blood and stored in HPLC haemolysant at  $-70^{\circ}\text{C}$  for up to 1 year prior to assay. Measurements were obtained using an ion-exchange HPLC assay using the HA-8140 Hi-Auto HbA<sub>1c</sub> analyser (Menarini Diagnostics), maintained in alignment with the Diabetes Control and Complications Trial (DCCT) method.

### **ARIC (The Atherosclerosis Risk in Communities Study)**

The ARIC study<sup>5</sup>, sponsored by the National Heart, Lung and Blood Institute (NHLBI), is a prospective epidemiologic study conducted in four U.S. communities: Minneapolis, MN, Washington County, MD, Forsyth County, NC, and Jackson, MS. ARIC is designed to investigate the etiology and natural history of atherosclerosis, the etiology of clinical atherosclerotic diseases, and variation in cardiovascular risk factors, medical care and disease by

race, gender, location, and date. The ARIC Cohort Component began in 1987, and each ARIC field center randomly selected and recruited a cohort sample of approximately 4,000 individuals aged 45-64 from a defined population in their community. A total of 15,792 participants (~27% African American; ~55% women) received an extensive examination, including medical, social, and demographic data. These participants were reexamined every three years with the first screen (baseline) occurring in 1987-89, the second in 1990-92, the third in 1993-95, and the fourth in 1996-98, and the fifth in 2011-2013. ARIC is an ongoing study, and contemporary interests include aspects of heart failure and healthy aging. Phenotypes for the current study were taken from the baseline visit (visit 1) during 1987-1989. After exclusions for those missing phenotype and genotype data, a maximum of 9481 European and 2860 African ancestry individuals were included in analyses.

### Genotyping process

DNA samples were genotyped using the Affymetrix 6.0 SNP array and the Birdseed calling algorithm at the Broad Institute Center for Genotyping and Analysis (CGA). Genotypic data that passed initial quality control at the Broad Center for Genotyping and Analysis (CGA) were released to the GENEVA Coordinating Center (CC), the NCBI dbGaP team and the ARIC project team. For European ancestry samples, a total of 9743 individuals were genotyped. Of these 402 individuals were dropped for first degree relatedness, unexpected duplicates, PC outliers, and sex discrepancies. A total of 9345 European ancestry samples were further used for imputation and other analyses. For African ancestry samples, a total of 3207 individuals were genotyped. Of these 333 individuals were dropped for first degree relatedness, lack of consistency with prior genotypes, and PC outliers. A total of 2874 African ancestry samples were further used for imputation and other analyses. A total of sixty variants on the mitochondria were available for imputation for European and African ancestry individuals. The positions of these markers was updated using the latest MT Cambridge Revised Sequence (rCRS) for Human MT-DNA in preparation for the CHARGE<sub>mtDNA</sub>+ working group imputation protocol. We used PLINK software to prepare data in binary format, SHAPEIT2 for pre-phasing mtDNA haplotypes and IMPUTE2 combined with the latest 1000 Human Genomes Reference (<ftp://ftp.1000genomes.ebi.ac.uk/vol1/ftp/release/20130502/>), April 2016 release, for performing imputation of the full mitochondrial genome. In AA, the imputation quality was 99.3%, yielding 3622 mtDNA variants. In EA, imputation quality was 99.4%, yielding 3622 mtDNA variants. After applying fcGENE to convert probabilities per cell to dosage, 450 mtDNA variants in AA and 205 mtDNA variants in EA remained polymorphic.

### **The 1936 Birth Cohort / 60 Years**

The cohort consists of 656 mostly non-diabetic individuals born in 1936, who, on 2 April 1976, were resident in one of four municipalities nearby Glostrup Hospital, Denmark. The cohort was collected to assess the age-specific prevalence of diabetes mellitus and impaired glucose tolerance in 60-year-old individuals in 1996/97<sup>6</sup>.

### **Addition-Pro**

ADDITION-PRO is a longitudinal cohort study of individuals at low to high risk of type 2 diabetes, nested within the population-based ADDITION-Denmark trial of screen-detected diabetes. The ADDITION-PRO cohort comprises 2082 adults (>45 years) collected to have IGT, IFG, or NGT either with high or low risk of developing type 2 diabetes (based on

information about age, sex, gestational diabetes, family history of diabetes, hypertension, BMI, and level of physical activity). 1548 genotyped individuals was included in the present study. The samples were collected in 2009–2011 from four Danish research centers (Steno Diabetes Center, Aarhus University Hospital, Holstebro Hospital, and Hospital of South West Jutland, Esbjerg). The study was approved by the Ethics Committee of the Central Denmark Region (journal no. 20080229) and was conducted in accordance with the Helsinki Declaration. All participants provided written informed consent.

### **Cogen**

The Copenhagen Cardiovascular Genetic study (COGEN) is a biobank that has collected superfluous whole blood from patients admitted to six cardiology departments in the greater region of Copenhagen from 2010–2017. COGEN currently contains samples from ~80,000 individuals. Due to a Danish permanent identification number (given to all permanent residents), these data can be linked with various clinical databases at an individual level. The present study population is comprised of individuals who have had at least one coronary angiogram performed between 2010–2014. From the Eastern Danish Heart Registry, which is a clinical database, we gathered information on demographics (e.g. age, sex, and BMI) and comorbidities (e.g. diabetes) which has been routinely entered on all patients in the Eastern region of Denmark. Information on e.g. glucose and HbA1c was gathered from routine blood samples.

### **Goya**

Goya is a case-cohort study<sup>7</sup> where cases and equal numbers of population-based controls (n=2,740) were drawn from two large Danish cohorts. The two different cohorts used, were the Danish National Birth Cohort for women and a draft board examination cohort for men, respectively. Both were constituted by young Danish adults and the cases identified as those with most extreme BMI scores, whereas controls were randomly sampled. The male control group were identified from the records of 362,200 Caucasian men examined at the mean age of 20 years at the draft boards in Copenhagen and its surroundings during 1943–77. The female cases and control group were selected from 91,387 pregnant women recruited to the Danish National Birth Cohort during 1996–2002. In the present study, a total of 5373 genotyped individuals were included. Cases and controls were analyzed separately. The study was conducted as part of the activities of the Danish Obesity Research Center (DanORC, [www.danorc.dk](http://www.danorc.dk)) and the MRC center for Causal Analyses in Translational Epidemiology (MRC CAiTE).

### **Health2006**

The Health2006 cohort (KA20060011), is a population-based epidemiological study with the aim to assess the population prevalence of risk factors for different chronic diseases including, e.g., diabetes mellitus, and cardiovascular disease. It is composed as a random sample of the population aged 18 to 74 years and living in the south-western part of the greater Copenhagen area. A total of 3471 patients entered the study and participated in a health examination between June 2006 and June 2008 of which a subset was genotyped. In total, 2415 fully genotyped individuals were included in the present study. Written informed consent was obtained from all participants, and the study was approved by the Scientific Ethics Committee of the Capital Region of Denmark (KA-20060011) and was in accordance with the principles of the Declaration of Helsinki II. <https://clinicaltrials.gov/ct2/show/record/NCT00316667>.

## **Inter99**

Inter99 is a population based intervention cohort <sup>8</sup>, comprised of individuals from the Copenhagen area. Altogether 6161 individuals participated in the baseline examination, were genotyped and included in the present study. The Inter99 study is funded by The Danish Medical Research Council, The Danish Center for Evaluation and Health Technology Assessment, Novo Nordisk, Copenhagen County, The Danish Heart Foundation, The Danish Pharmaceutical Association, Augustinus foundation, Ib Henriksen foundation and Becket foundation.

## **Vejle Biobank**

Vejle Biobank was established as a regional biobank between 2007 and 2010 <sup>9</sup>. The population, aged 25-75 years contains diabetes patients age- and gender -matched to a control population recruited from the Danish civil registry. Included patients were diagnosed if they had at least one glycated hemoglobin (HbA1c) value  $\geq 6.6\%$  ( $\geq 48.6$  mmol/mol). 2,415 individuals were genotyped and included in this study.

## **EPIC-InterAct Study**

The prospective InterAct type 2 diabetes case-cohort study <sup>10</sup> is coordinated by the MRC Epidemiology Unit in Cambridge and nested within the European Prospective Investigation into Cancer and Nutrition (EPIC). EPIC was initiated in the late 1980s and involves collaboration between 23 research institutions across Europe in 10 countries (Denmark, France, Germany, Greece, Italy, the Netherlands, Norway, Spain, Sweden and the United Kingdom). The majority of EPIC cohorts were recruited from the general population, with some exceptions. EPIC-InterAct included participants from 8 European countries, as data from Norway and Greece were not available. The case-cohort sample included 12,403 cases of type 2 diabetes and 16,154 subcohort members. Samples in EPIC Cambridge centre were excluded from this analysis because they overlap with EPIC-Norfolk study (see description below).

EPIC-InterAct samples were genotyped on Illumina 660w quad chip and Human Core-Exome-12v1-0\_Bchip. Quality control was performed and failed samples were removed from further analysis. Data used in this analysis includes 8364 and 6745 participants genotyped on Illumina 660w quad chip and Human Core-Exome-12v1-0\_Bchip, respectively. Analysis was done by chip.

## **EPIC-Norfolk**

The EPIC-Norfolk study <sup>11</sup> is a prospective population-based cohort study which recruited 25,639 men and women aged 40-79 years at baseline between 1993 and 1997 from 35 participating general practices in Norfolk, United Kingdom. Individuals attended for a baseline health check including the provision of blood samples for concurrent and future analysis. They provided consent to future linkage to medical record information and a wide range of follow-up studies for different disease endpoints (including incident T2DM) have subsequently been undertaken, and further health check visits have been conducted since the baseline visit (see [www.srl.cam.ac.uk/epic](http://www.srl.cam.ac.uk/epic)).

DNA has been extracted from all EPIC participants and stored blood has been analysed for an extensive range of classical and novel biomarkers. Sample quality control was performed including gender check, relatedness check, and ancestry check. Samples that failed quality control were removed from further analysis. Data used in this analysis includes 19,225 participants and their measures at the baseline health check.

### **Family Heart Study**

The NHLBI FamHS study <sup>12</sup> design, collection of phenotypes and covariates as well as clinical examination have been previously described <sup>1</sup>. In brief, the FamHS recruited 1,200 families (approximately 6,000 individuals), half randomly sampled, and half selected for family history of coronary heart disease (CHD) or risk factor abnormalities as compared with age- and sex-specific population rates. The participants were sampled from four population-based parent studies: the Framingham Heart Study, the Utah Family Tree Study, and two centers for the Atherosclerosis Risk in Communities study (ARIC: Minneapolis, MN, and Forsyth County, NC). These individuals attended a clinic exam (1994-1996) where a broad range of phenotypes were assessed in the general domains of CHD, atherosclerosis, cardiac and vascular function, inflammation and hemostasis, lipids and lipoproteins, blood pressure, diabetes and insulin resistance, pulmonary function, diet, education, socioeconomic status, habitual behavior, physical activity, anthropometry, medical history and medication use. Approximately 8 years later, study participants belonging to the largest pedigrees were invited for a second clinical exam (2002-04). The most important CHD risk factors were measured again, including lipids, parameters of glucose metabolism, blood pressure, anthropometry, and several biochemical and hematologic markers. In addition, a computed tomography examination provided measures of coronary and aortic calcification, and abdominal and liver fat burden. Medical history and medication use was updated. A total of 2,756 European ancestry subjects in 510 extended random and high CHD risk families were studied. Also, 633 African ancestry subjects were recruited at ARIC field center at the University of Alabama in Birmingham. Informed consent was obtained from all participants.

From FamHS, 2,098 subjects were genotyped on Illumina Human Exome 12v1.0 BeadChip. Quality controls including Mendelian errors were assessed with LOKI, and pedigree relationship was checked using the pairwise correlation among exomechip autosome and GWAS autosome data. Originally 172 mitochondrial markers were genotyped. Based on CHARGE<sub>mtDNA</sub>+ WG probe blast, all these MT markers were valid and had the same position as in the Revised Cambridge Reference Sequence (rCRS) of the Human Mitochondrial DNA. There were 11 heterozygous mitochondrial haploid genotypes, which were set to missing before imputation via PLINK. We were able to impute 3631 MT markers with IMPUTE2 and the latest 1000 Human Genomes Reference (<ftp://ftp.1000genomes.ebi.ac.uk/vol1/ftp/release/20130502/>) released for MT in April, 2016. Based on the imputation accuracy assessment implemented within IMPUTE2, the concordance rate between original MT marker genotypes and the same ones imputed was 99.9%. After fcGENE software converted probabilities per cell to dosage and filtering, 390 markers remained as polymorphic and used for single variant association (Regression) and SKAT gene based association testing (seqMeta R package).

### **Fenland Study**

The Fenland study <sup>13</sup> is a population-based cohort study that uses objective measures of disease exposure, such as accurate methods of body composition and energy expenditure, to study the

interactions between genetic and lifestyle factors that cause obesity and diabetes. 12,435 people were recruited from general practice lists in and around Cambridgeshire (Cambridge, Ely, and Wisbech) in the United Kingdom from birth cohorts from 1950–1975 during 2005–2015 in the first phase of the Fenland Study. 8,994 baseline samples were genotyped on Affymetrix Axiom UKBiobank chip, of which 8,453 samples passed quality control and were included in this analysis.

### **Framingham Heart Study**

The Framingham Heart Study (FHS) <sup>14,15</sup> is a population-based, prospective study, which aims to examine the natural history, risk factors, and prognosis of cardiovascular, lung, and other diseases. The study began in 1948 with the recruitment of an original cohort of 5,209 men and women from the town of Framingham, Massachusetts. In 1971, the study recruited its offspring cohort, including 5,124 offspring and spouses of offspring of the FHS Original cohort. The Third Generation cohort started recruiting the adult children (n=4,095) of the offspring cohort participants in 2002. Participants underwent examinations every two years (the original cohort) or every four to eight years (the offspring and the third generation) to collect demographic and clinical measures and medical history .

A total of 199 unique mitochondrial DNA (mtDNA) variants in 8191 FHS individuals from two platforms were used for imputation. One platform was a customized array including 40 mtDNA variants genotyped by Illumina. The second platform was the human exome chip genotyping array by Illumina. All markers were aligned to correct positions according to the revised Cambridge Reference Sequence (rCRS). Prior to imputation, all markers were examined for incompatibilities in maternal lineages. Inconsistent alleles in pedigree members were set to missing. Any heteroplasmic alleles were also set to missing.

Mitochondrial DNA imputation was based on the Cosmopolitan 1000 Genomes Phase 3 mtDNA of 2505 individuals from 26 populations conforming with the rCRS of the Human mtDNA positions known also as v.5 phase 3 of 1000 Human Genomes HG19, GRCh37 cosmopolitan mitochondrial reference panel (<ftp.1000genomes.ebi.ac.uk/vol1/ftp/>) released for mitochondrial DNA in 2016. The imputation of mtDNA variants followed the CHARGE<sub>mtDNA</sub>+ working group (WG) protocol, using PLINK software for preparing FHS data in binary format, SHAPEIT2 for pre-phasing FHS mtDNA haplotype scaffold and IMPUTE2 for performing imputation of the full MT genome. The imputation quality was 99.9%, yielding 2636 mtDNA variants. After filtering in fcGENE, 639 markers remained for subsequent analyses.

This study includes individuals from the Offspring cohort and the Third Generation cohort. The proportion of female =53.6%.

BMI was measured at exam 7 for Offspring and exam 1 for Generation 3. Fasting glucose and insulin, HOMA-b and HOMA-IR were measured at exam 5 for Offspring and exam 1 for Generation 3. Hba1c was measured at exam 8 for Offspring. WHR was measured at exam 8 for Offspring and exam 2 for Generation 3. The exam 8 for Offspring and exam 2 for Generation 3 were at similar time periods.

### **GeneSTAR (Genetic Study of Atherosclerosis Risk)**

GeneSTAR began in 1982 as the Johns Hopkins Sibling and Family Heart Study, a prospective longitudinal family-based study conducted originally in healthy adult siblings of people with

documented early onset coronary disease under 60 years of age who were hospitalized in one of ten Baltimore, Maryland hospitals. Siblings who were free of known coronary disease, autoimmune disease, and any life-threatening disease, and not pregnant, using chronic glucocorticosteroid therapy, or reporting history of chest radiation exposure were recruited. Between 1983 and 2007, 1656 European- and African-American siblings completed a baseline examination including demographics, medical history, medication use, physical examination by a cardiologist, exercise treadmill test using a modified Bruce protocol, family history, diet, anthropometrics, blood pressure measurement, smoking status, physical activity and fasting blood measures including lipids, glucose, insulin, fibrinogen, Lp(a), and inflammatory markers<sup>16-18</sup>, Siblings are followed regularly via questionnaire or repeat screening for incident cardiovascular disease, stroke, peripheral arterial disease, diabetes, cancer, and related comorbidities, from 10 to 35 years after study entry<sup>19,20</sup>. Commencing in 2003, the siblings, their offspring, and the coparent of the offspring (total N=3003) participated in a 2 week trial of aspirin 81 mg/day with pre and post ex vivo platelet function assessed using multiple agonists in whole blood and platelet rich plasma along with assessment of anthropometrics, blood pressure measurement, smoking status, physical activity and fasting blood measures including lipids, glucose, fibrinogen, and inflammatory markers<sup>21,22</sup>. The offspring are also followed regularly using the same protocol and outcomes as the siblings. The GeneSTAR study was approved by the Johns Hopkins Medicine Institutional Review Board, and all participants gave written informed consent prior to screening.

Genotyping was performed with the Illumina 1M\_v1C chip in 3,232 GeneSTAR participants at deCODE Genetics in Reykjavik, Iceland. Standard quality control measures were employed, including duplicates and controls on each plate, gender checks, and Mendelian consistency checks. All samples with gender discrepancies, >10% missing data, >5% Mendelian inconsistencies, or outliers from EIGENSTRAT principal component analysis were removed prior to analysis or imputation. There were 162 mitochondrial markers genotyped. Positions were remapped using the Revised Cambridge Reference Sequence of the Human Mitochondrial DNA per the CHARGE mtDNA working group. No heterozygous haploid genotypes or SNPs with 10% missing were identified. We were able to impute 3642 MT markers in both European Americans and African Americans separately using IMPUTE2 and the latest 1000 Human Genomes Reference (<ftp://ftp.1000genomes.ebi.ac.uk/vol1/ftp/release/20130502/>) released for MT in April, 2016. Based on the imputation accuracy assessment implemented within IMPUTE2, the concordance rate between original MT marker genotypes and the same ones imputed was 99.8% for both European Americans and African Americans. After fcGENE software converted probabilities per cell to dosage and filtering, 492 markers for European Americans and 714 markers for African Americans remained as polymorphic and were used for single variant association (regression) and SKAT gene based association testing (seqMeta R package).

### **GENOA (Genetic Epidemiology Network of Arteriopathy)**

The GENOA cohorts recruited non-Hispanic African American (AA) and white participants (EA) from two centers between 1996 and 2000<sup>23</sup>. As described previously, in Jackson, MS, USA, residents with essential hypertension were identified through the Atherosclerosis Risk in Communities cohort, a general population sample of 45- to 64-year-old non-Hispanic African American residents. The non-Hispanic white subjects in the present study were members of sibships initially enrolled in Rochester, MN, USA between July 1997 and August 1999 in the

GENOA of the Family Blood Pressure Program (FBPP) <sup>24</sup>. The FBPP, sponsored by the National Heart, Lung, and Blood Institute, was designed to identify and characterize genetic determinants of hypertension and its associated cardiac and renal complications. For the GENOA–Rochester cohort, the Mayo Clinic diagnostic index and medical record linkage system of the Rochester Epidemiology Project <sup>25</sup> were used to identify non-Hispanic white residents of Olmsted County with a diagnosis of essential hypertension made before age 60. Probands with evident secondary hypertension or advanced chronic kidney disease (serum creatinine >2.0 mg/dl) were not recruited at either site. The hypertensive proband and all siblings were invited to participate if at least one other sibling had essential hypertension. Between 2000 and 2004, 2721 (79%) of the 3434 original GENOA participants (1482 African Americans and 1239 whites) returned for a second clinic visit. All subjects provided consent and all protocols were approved by the Mayo Clinic and University of Mississippi Medical Center Institutional Review Boards.

In the African American cohort, subjects were genotyped primarily on the Affymetrix SNP Array 6.0. Samples that failed on the Affymetrix SNP Array 6.0 were run again on the Illumina 1M-Duo platform. Then, the genotype data for the African American cohort were merged. In the non-Hispanic white cohort, subjects were genotyped primarily on the Affymetrix SNP Array 6.0. Samples that failed on the Affymetrix SNP Array 6.0 were run again on the Illumina 660W and Illumina 1M-Duo platforms. Then, the genotype data for the non-Hispanic white cohort were merged.

Prior to mitochondrial (MT) marker imputation, 90 MT markers were available in the AA cohort genotype data and 56 in the EA cohort, respectively. Further, based on CHARGE<sub>mtDNA+</sub> WG probe blast, 63 MT markers in the AA and 45 markers in the EA subjects were found valid and were updated with the latest Revised Cambridge Reference Sequence (rCRS) positions of the Human Mitochondrial DNA. The sets of 63 and 45 MT markers were used separately as scaffold for haplotype prephasing and for MT imputation.

Mitochondrial imputation used the latest 1000 Human Genomes Reference (<ftp://ftp.1000genomes.ebi.ac.uk/vol1/ftp/release/20130502/>) released for MT in April 2016. The procedure of MT imputation followed the CHARGE<sub>mtDNA+</sub> working group (WG) protocol, using PLINK software for preparing the data in binary format, SHAPEIT2 for prephasing MT haplotype and IMPUTE2 for performing imputation of the full MT genome, separately for AA and EA cohorts.

The GENOA imputed dosage file (after fcGENE converting and filtering) contained 3,617 good quality MT markers for 1,263 AA subjects and 3,615 good quality MT markers for 1,386 EA subjects, respectively. Based on the IMPUTE2 imputation accuracy assessment, the imputation concordance rate between original MT genotypes and the same imputed ones was 99.5% for AA cohort and 99.3% for EA cohort, respectively. Among the good quality imputed MT markers, only 334 MT markers had  $R^2 \geq 0.3$  and were polymorphic in AA cohort and 134 MT markers in EA cohort, respectively. A few heterozygotes in the imputed data were considered as possible genotyping/imputation errors and turned to missing prior to association analysis.

**GOLDN (Genetics of Lipid Lowering Drugs and Diet Network Study)**



GOLDN participants were recruited from 3-generation families previously screened in the NHLBI Family Heart Study (FHS) Minnesota or Utah centers<sup>12</sup>. Because FHS was conducted mostly in participants of Caucasian descent, the GOLDN population is predominantly white. Excluded were people with fasting TGs  $\geq 1500$  mg/d; recent history of myocardial infarction or coronary revascularization; a history of liver, kidney, pancreas, or gall bladder disease; a history of nutrient malabsorption; current use of insulin; abnormal liver or kidney function; or currently pregnant or nursing. Individuals who currently used prescription or dietary supplements that influenced lipids were required to discontinue them for 4 weeks prior to study. The GOLDN sample consisted of 1048 individuals in 184 pedigrees (average family size 6.2); mean age at intervention was  $49 \pm 16$ , 48% male, 51% from MN, and 8% were current smokers. This gene-environment interaction study employed two interventions, one to raise lipids and one to lower lipids. In the post-prandial lipemia (PPL) intervention, participants fasted for  $\geq 12$  hr and abstained from alcohol intake for  $\geq 24$ . The PPL intervention followed the protocol of Patsch *et al.* (1992)<sup>26</sup>. The whipping cream (83% fat) meal had 700 Calories/m<sup>2</sup> body surface area; 3% of calories were derived from protein, and 14% from carbohydrate. Blood samples were drawn immediately before (fasting) and at 3.5 and 6 hours after consuming the high-fat meal. During the 6-hour study period, participants consumed only water and abstained from physical activity. The lipid-lowering intervention was a 3-wk, open-label trial of fenofibrate (FFB, 160 mg qd). A detailed description of the GOLDN study design can be found in Lai, *et al.* (2007)<sup>27</sup>.

Out of 1048 individuals in the study, only 862 subjects were genotyped on Affy6.0. Originally, 110 mitochondrial markers were genotyped in Affy6.0. Based on CHARGE<sub>mtDNA</sub>+ WG probe blast, all these MT markers were valid and had the same position as in the Revised Cambridge Reference Sequence (rCRS) of the Human Mitochondrial DNA. We were able to impute 3603 MT markers with IMPUTE2 and the latest 1000 Human Genomes Reference (<ftp://ftp.1000genomes.ebi.ac.uk/vol1/ftp/release/20130502/>) released for MT in April 2016. Based on the imputation accuracy assessment implemented within IMPUTE2, the concordance rate between original MT marker genotypes and the same ones imputed was 100%. After  $R^2 > 0.3$  filtering, 3129 markers remained and were used for single variant association (Regression) and SKAT gene based association testing (seqMeta R package).

### **The Hispanic Community Health Study/Study of Latinos (HCHS/SOL)**

The Hispanic Community Health Study/Study of Latinos (HCHS/SOL) is a community-based cohort study of self-identified Hispanic/Latino individuals from four US metropolitan areas<sup>28</sup>. As described previously, the HCHS/SOL sample survey design consisted of a two-stage probability sample of households at each of four recruitment centers: Chicago, Miami, the Bronx, and San Diego<sup>29</sup>. Census block groups were selected in defined communities near each center, and households were sampled within block groups. Households with Hispanic/Latino surnames and individuals were oversampled as a means of increasing representation of the Hispanic/Latino target population; likewise, households with residents over 45 years of age were oversampled so a more uniform age distribution could be achieved. Sampling weights were calculated for each individual to reflect the probability of sampling. Baseline examination methods were described by Sorlie *et al.*<sup>28</sup>. The HCHS/SOL study was approved by institutional review boards at participating institutions, and written informed consent was obtained from all participants.

DNA extracted from blood was genotyped on an Illumina custom array, SOL HCHS Custom 15041502 B3, consisting of the Illumina Omni 2.5M array (HumanOmni2.5-8v1-1) and ~150,000 custom SNPs selected to include ancestry-informative markers, variants characteristic of Amerindian populations, previously identified GWAS hits, and other candidate-gene polymorphisms. Samples were checked for annotated sex or genetically determined sex, gross chromosomal anomalies<sup>30</sup>, unexpected duplicates, missing call rates, contamination, and batch effects<sup>31</sup>. Portions of the genome with large chromosomal anomalies were filtered out in 71 samples. A total of 12,803 samples passed quality control with a missing call rate < 1%. Quality metrics used to filter SNPs for the imputation basis and association testing included missing call rate (>2%), Mendelian errors (>3 in 1,343 trios or duos), duplicate-sample discordance (>2 in 291 sample pairs), and deviation from Hardy-Weinberg equilibrium ( $p < 10^{-5}$  in a meta-analysis of nine groups within which individuals had both parents from the same country of origin). SNPs were regarded as “informative” if they had no positional duplicate on the array and were polymorphic in the sample. A total of 2,232,944 SNPs passed quality metrics and were informative. Genotype imputation was performed with the 1000 Genomes Project phase 1 reference panel<sup>32</sup>. The 12,803 samples were imputed together with genotyped SNPs that passed quality filters and represented unique positions on the autosomes and non-pseudo-autosomal parts of the X chromosome. For the current project, we updated the list of individuals providing consent, as of 2016, which included 12,434 individuals. After eliminating SNPs that failed quality metrics, 321 high quality mtDNA variants were available for inclusion in these analyses. Among these 321 variants, 209 had a minor allele frequency (MAF) of at least 1%-2%. The imputation of mtDNA variants followed the CHARGE mtDNA+ working group (WG) protocol. We used PLINK software to prepare data in binary format, SHAPEIT2 for pre-phasing mtDNA haplotypes and IMPUTE2 combined with the latest 1000 Human Genomes Reference (<ftp://ftp.1000genomes.ebi.ac.uk/vol1/ftp/release/20130502/>), April 2016 release, for performing imputation of the full mitochondrial genome. The imputation quality in 99.3%, yielding 3667 mtDNA variants. After applying fcGENE to convert probabilities per cell to dosage, 757 mtDNA variants remained polymorphic.

## **HyperGEN**

HyperGEN is a family-based study that looks at the genetic causes of hypertension and related conditions in EA and AA subjects. HyperGEN recruited hypertensive sibships, along with their normotensive adult offspring, and an age-matched random sample. Families were drawn from population-based cohorts or the community-at-large if sibships had  $\geq 2$  siblings who had been diagnosed with hypertension before age 60. The study was later extended to include siblings and offspring of the original sibpairs. Hypertension was defined as current antihypertensive medication use or having an average systolic blood pressure  $\geq 140$  mm Hg and/or diastolic blood pressure  $\geq 90$  mm Hg measured at two clinic visits. In total, HyperGEN has collected data on 2,471 Caucasian-American subjects (2,029 in 455 extended families) and 2,300 African-American subjects (1,886 from 584 families), from five field centers in Alabama, Massachusetts, Minnesota, North Carolina, and Utah. The HyperGEN study design and methods have been previously described<sup>33,34</sup>. In the present report, we used genetic marker data from 1,695 CA and

1,258 AA subjects genotyped using Illumina Cardio-MetaboChip and Affymetrix SNP Array 6.0, respectively.

In the HyperGEN AA cohort, after applying established QC procedures we retained data of 1,258 subjects genotyped primarily on the Affymetrix SNP Array 6.0. A total of 44 mitochondrial markers from the Affymetrix SNP Array 6.0 data remained in the AA cohort after initial QC. Similarly in the HyperGEN CA cohort, after QC we included data of 1,695 subjects genotyped on the Illumina Cardio-MetaboChip. The ChargeMT DNA working group protocol was applied to further process the MT genotype data. Based on CHARGE<sub>mtDNA</sub>+ WG probe blast, 44 markers in the AA cohort and 52 in the CA cohort were valid and had the same position as in the Revised Cambridge Reference Sequence (rCRS) of the Human Mitochondrial DNA. These markers were further used for imputation and association analysis. The imputation of mtDNA variants followed the CHARGE<sub>mtDNA</sub>+ working group (WG) protocol, using PLINK software for preparing data in binary format, SHAPEIT2 for pre-phasing mtDNA haplotype scaffold and IMPUTE2 combined with the latest 1000 Human Genomes Reference (<ftp://ftp.1000genomes.ebi.ac.uk/vol1/ftp/release/20130502/>), April 2016 release, for performing imputation of the full MT genome. The imputation quality in AA was 86.2%, yielding 3616 mtDNA variants; whereas in CA the imputation quality was 98.4%, yielding 3618 mtDNA variants. After applying fcGENE to convert probabilities per cell to dosage, 118 and 119 MT markers remained polymorphic, in AA and CA cohorts, respectively, and were used in a regression based single-variant association analysis. The R package seqMeta was used to derive gene-based statistics for association testing.

### **Long Life Family Study (LLFS)**

LLFS is a family-based cohort study, including four clinical centers: Boston University Medical Center in Boston, MA, USA, Columbia University Medical School, New York, NY, USA, University of Pittsburgh in Pittsburgh PA, USA, and University of Southern Denmark, Denmark. The study characteristics, recruitment, eligibility and enrollment have been previously described<sup>35-37</sup>. In brief, the LLFS was designed to determine genetic, behavioral, and environmental factors related to families of exceptionally healthy, elderly individuals. Phase 1 was conducted between 2006 and 2009 recruiting 4,953 individuals from 539 families. The probands were at least 79 years old in the USA centers, and 90 years old or older in Denmark. The families were selected to participate in the study based on The Family Longevity Selection Score (FLoSS)<sup>36</sup>, a score generated according to birth-year cohort survival probabilities of the proband and their siblings. Probands and their families with FLoSS score of 7 or higher, at least one living sibling, and at least one living offspring (minimum family size of 3), who were able to give informed consent and willing to participate were recruited. The individuals were genotyped using ~2.5 million SNPs from the Illumina Omni chip. The LLFS is currently gathering data during a second in-home visit, averaging about 7-8 years after the first visit.

Prior to mitochondrial (MT) marker imputation, 253 MT markers were examined for typing incompatibilities in pedigrees, and 32 discrepant genotypes in 30 pedigrees were identified. The corresponding non-conform genotypes were zeroed out for a whole matrilineage group for an erroneous marker. Further, based on work of CHARGE<sub>mtDNA</sub>+ WG collaboration, blast probe

matches of LLFS MT markers of Illumina Omni chip, 110 MT markers were found not valid and dropped from the analysis. The remaining 143 MT markers were updated with latest MT Cambridge Revised Sequence (rCRS) of the Human MT-DNA positions, and used as scaffold for haplotype prephasing and for MT imputation.

Mitochondrial imputation were based on the Cosmopolitan 1000 Genomes Phase 3 MT DNA of 2505 individuals from 26 populations conforming with the rCRS of the Human MT-DNA positions known also as v.5 phase 3 of 1000 Human Genomes HG19, GRCh37 cosmopolitan mitochondrial reference panel (<ftp://1000genomes.ebi.ac.uk/vol1/ftp/>) released for MT in 2016. The procedure of MT imputation followed the CHARGE<sub>mtDNA</sub>+ working group (WG) protocol, using PLINK software for preparing LLFS data in binary format, SHAPEIT2 for prephasing LLFS MT haplotype scaffold and IMPUTE2 for performing LLFS imputation in one window in the length of the full MT genome.

The final LLFS imputed dosage file (after fcGENE converting and filtering) contained 451 polymorphic MT markers for 4,710 subjects. Based on the IMPUTE2 imputation accuracy assessment, the imputation concordance rate between original MT genotypes and the same imputed ones for LLFS was 99.7%. A few heterozygotes in the original data were considered as possible genotyping errors and turned to missing via PLINK.

#### **Lothian Birth Cohort of 1921 (LBC1921)**

The LBC1921<sup>38-40</sup> consists of 550 participants (316 female) who were born in 1921 and at age 11 took part in the Scottish Mental survey of 1932. Individuals who took part in the Scottish Mental Survey were identified through examining the records of those registered with a general practitioner in the area. At age 79 these individuals were followed up and those living in Edinburgh and the surrounding regions were recruited into the LBC1921 cohort. They are healthy older age individuals living independently within the community. Both BMI and Hba1c were measured at age 79. Venous whole blood was extracted following informed consent and ethical approval was given from The Lothian Research Ethics Committee.

#### **Lothian Birth Cohort 1936 (LBC1936)**

The LBC1936<sup>41</sup> has a total of 1091 participants (543 female) who took part in the Scottish Mental Survey of 1947. These individuals were recruited in a similar fashion to the participants of the LBC1921 cohort. At age 70 these individuals were recruited into the LBC1936 where both BMI and Hba1c were measured. These participants were healthy individuals who were able to live independently within the community. Venous whole blood was extracted following informed consent and ethical approval was granted by Scotland's Multi-Center Research Ethics Committee and the Lothian Research Ethics Committee.

#### **MESA (Multi-Ethnic Study of Atherosclerosis)**

The Multi-Ethnic Study of Atherosclerosis (MESA) is a study of the characteristics of subclinical cardiovascular disease and the risk factors that predict progression to clinically overt cardiovascular disease or progression of the subclinical disease. MESA consisted of a diverse, population-based sample of an initial 6,814 asymptomatic men and women aged 45-84. 38 percent of the recruited participants were white, 28 percent African American, 22 percent Hispanic, and 12 percent Asian, predominantly of Chinese descent. Participants were recruited from six field centers across the United States: Wake Forest University, Columbia University, Johns Hopkins University, University of Minnesota, Northwestern

University and University of California - Los Angeles. This study was approved by the IRB of each study site, and written informed consent was obtained from all participants. Each participant received an extensive physical exam and determination of coronary calcification, ventricular mass and function, flow-mediated endothelial vasodilation, carotid intimal-medial wall thickness and presence of echogenic lucencies in the carotid artery, lower extremity vascular insufficiency, arterial wave forms, electrocardiographic (ECG) measures, standard coronary risk factors, sociodemographic factors, lifestyle factors, and psychosocial factors. Selected repetition of subclinical disease measures and risk factors at follow-up visits allowed study of the progression of disease. Participants are being followed for identification and characterization of cardiovascular disease events, including acute myocardial infarction and other forms of coronary heart disease (CHD), stroke, and congestive heart failure; for cardiovascular disease interventions; and for mortality. The first examination took place over two years, from July 2000 - July 2002. It was followed by four examination periods that were 17-20 months in length. Participants have been contacted every 9 to 12 months throughout the study to assess clinical morbidity and mortality.

### **NEO (The Netherlands Epidemiology of Obesity study)**

The NEO was designed for extensive phenotyping to investigate pathways that lead to obesity-related diseases. The NEO study is a population-based, prospective cohort study that includes 6,671 individuals aged 45–65 years, with an oversampling of individuals with overweight or obesity. At baseline, information on demography, lifestyle, and medical history have been collected by questionnaires. In addition, samples of 24-h urine, fasting and postprandial blood plasma and serum, and DNA were collected. Genotyping was performed using the Illumina HumanCoreExome chip, which was subsequently imputed to the 1000 genome reference panel. Participants underwent an extensive physical examination, including anthropometry, electrocardiography, spirometry, and measurement of the carotid artery intima-media thickness by ultrasonography. In random subsamples of participants, magnetic resonance imaging of abdominal fat, pulse wave velocity of the aorta, heart, and brain, magnetic resonance spectroscopy of the liver, indirect calorimetry, dual energy X-ray absorptiometry, or accelerometry measurements were performed. The collection of data started in September 2008 and completed at the end of September 2012. Participants are currently being followed for the incidence of obesity-related diseases and mortality.

### **OOA (The Old Order Amish Study)**

The Old Order Amish of Lancaster County, PA are a genetically homogeneous population whose ancestors emigrated to the Lancaster area in the 1700's from north central Europe. The current day population of ~35,000 Older Amish in this community are nearly all descendants of the initial immigrants. Since 1993, investigators at the University of Maryland have worked closely with the Amish community to study the genetics of a number of complex diseases and traits. These studies generally employ community-based recruitment of relatively healthy individuals and their family members<sup>42-46</sup>. All studies were approved by the Institutional Review Board of the University of Maryland, and all subjects provided written informed consent.

This report is based on 2,312 Amish study participants who were genotyped on the Infinium HumanCoreExome-24 BeadChip. Mitochondrial DNA imputation was based on the Cosmopolitan 1000 Genomes Phase 3 mtDNA of 2505 individuals from 26 populations conforming with the rCRS of the Human mtDNA positions known also as v.5 phase 3 of 1000 Human Genomes HG19,

GRCh37 cosmopolitan mitochondrial reference panel (<ftp.1000genomes.ebi.ac.uk/vol1/ftp/>) released for mitochondrial DNA in 2016. The imputation of mtDNA variants followed the CHARGE<sub>mtDNA+</sub> working group (WG) protocol, using PLINK software for preparing LLFS data in binary format, SHAPEIT2 for pre-phasing FHS mtDNA haplotype scaffold and IMPUTE2 for performing imputation of the full MT genome. The imputation quality was 98.9%, yielding 3623 mtDNA variants. After filtering in fcGENE, 3623 markers remained for subsequent analyses.

The community has maintained detailed and accurate genealogical records of all members, and through these records, we are able to establish how each individual in the community is related to every other individual. To account for these relationships, association analysis of these phenotypes was performed under a variance component model that assesses the effect of genotype, as an additive effect, on the quantitative trait, while simultaneously estimating the effects of age, age<sup>2</sup>, sex, and a polygenic component to account for phenotypic correlation due to relatedness. The polygenic component was modelled using the relationship matrix derived from the pedigree structure to account for the relatedness of all subjects in the study. Genome-wide analysis using the a smaller version of the pedigree was carried out using the R software package.

### **1982 Pelotas (Brazil) Birth Cohort Study**

The maternity hospitals in Pelotas, a southern Brazilian city (current population ~330,000), were visited daily in the year of 1982. The 5,914 liveborns whose families lived in the urban area were examined and their mothers interviewed. Information was obtained for more than 99% of the livebirths. These subjects have been followed-up at the following mean ages: 11.3 months (all children born from January to April 1982; n=1457), 19.4 months (entire cohort; n=4934), 43.1 months (entire cohort; n=4742), 13.1 years (random subsample; n=715), 14.7 years (systematic subsample; n=1076); 18.2 (male cohorts attending to compulsory Army recruitment examination; n=2250), 18.9 (systematic subsample; n=1031), 22.8 years (entire cohort; n=4297) and 30.2 years (entire cohort; n=3701). Details about follow-up visits and available data can be found in the two Cohort Profile papers (PMID: 16373375 and 25733577). DNA samples (collected at the mean age of 22.8 years) were genotyped for ~2.5 million of SNPs using the Illumina HumanOmni2.5-8v1 array (which includes autosomal, X and Y chromosomes, and mitochondrial variants). After quality control, the data were prephased using SHAPEIT and imputed using IMPUTE2 based on 1000 Genomes haplotypes.

### **ROTTERDAM STUDY (II and III)**

**Rotterdam Study (RS)** is a population-based cohort study in Rotterdam, the Netherlands. The design of the RS has been previously described in detail elsewhere<sup>47</sup>. In brief, the RS includes three sub-cohorts. In 1990, all residents of Ommoord, a district in Rotterdam, aged 45 years and older were invited to participate (RS-I). In 2000, the cohort was extended with 3,011 participants who reached the age 55 years or who were 55 years and over and had moved into the research area (RS-II). In 2006, a third cohort of 3,934 participant aged 45 years and older was initiated (RS-III). Demographic and clinical variables were collected via standardized questionnaires at each visit and peripheral blood was collected for later analysis. The study was approved by the medical ethics committee at Erasmus University Rotterdam, Rotterdam, the Netherlands, and all

examined participants gave written informed consent. The RS participants were genotyped using the Illumina Infinium HumanHap550K v.3 (RS-I and RS-II) and HapMap 610 (RS-III) in the Genetic Laboratory of Erasmus MC Department of Internal Medicine, the Netherlands, following manufacturers' protocols and quality control standards.

A total of 199 unique mitochondrial DNA (mtDNA) variants from two platforms were used for imputation. One platform was a 550K v.3 including 40 mtDNA variants genotyped by Illumina. The second platform was 610 by Illumina. Further, based on work of CHARGE<sub>mtDNA</sub>+ WG collaboration, blast probe matches of RS MT markers of Illumina Omni chip, 100 MT markers were found not valid and dropped from the analysis. The remaining 143 MT markers were updated with latest MT Cambridge Revised Sequence (rCRS) of the Human MT-DNA positions, and used as scaffold for haplotype phasing and for MT imputation.

Mitochondrial imputation were based on the Cosmopolitan 1000 Genomes Phase 3 MT DNA of 2504 individuals from 26 populations conforming with the rCRS of the Human MT-DNA positions known also as v.5 phase 3 of 1000 Human Genomes HG19, GRCh37 cosmopolitan mitochondrial reference panel (<ftp://1000genomes.ebi.ac.uk/vol1/ftp/>) released for MT in 2016. The procedure of MT imputation followed the CHARGE<sub>mtDNA</sub>+ working group (WG) protocol, using PLINK software for preparing RS data in binary format, SHAPEIT2 for phasing LLFS MT haplotype scaffold and IMPUTE2 for performing RS imputation in one window in the length of the full MT genome.

The final RS imputed dosage file (after fcGENE converting and filtering) contained 451 polymorphic MT markers. Based on the IMPUTE2 imputation accuracy assessment, the imputation concordance rate between original MT genotypes and the same imputed ones for RS was 99.7%. A few heterozygotes in the original data were considered as possible genotyping errors and turned to missing via PLINK.

### **SHIP (Study of Health In Pomerania)**

The Study of Health In Pomerania <sup>48</sup> is a prospective longitudinal population-based cohort study in Western Pomerania assessing the prevalence and incidence of common diseases and their risk factors. SHIP encompasses the two independent cohorts SHIP and SHIP-TREND. Participants aged 20 to 79 with German citizenship and principal residency in the study area were recruited from a random sample of residents living in the three local cities, 12 towns as well as 17 randomly selected smaller towns. Individuals were randomly selected stratified by age and sex in proportion to population size of the city, town or small towns, respectively. A total of 4,308 participants were recruited between 1997 and 2001 in the SHIP cohort. Between 2008 and 2012 a total of 4,420 participants were recruited in the SHIP-TREND cohort. Individuals were invited to the SHIP study center for a computer-assisted personal interviews and extensive physical examinations. Blood samples were taken between 07:00 AM and 04:00 PM, and serum aliquots were prepared for immediate analysis and for storage at -80 °C in the Integrated Research Biobank (Liconic, Liechtenstein). Study participants were genotyped using the Illumina Infinium Human Exome BeadChip v1.0.

### **TUDR (Taiwan-US Diabetic Retinopathy Study)**

Taiwan-US Diabetic Retinopathy Study (TUDR) 2009 to present, is a cohort that enrolled subjects with Type 2 diabetes receiving care at Taichung Veteran General Hospital (Taichung VGH), and a small number of subjects from Taipei Tri-Service General Hospital. All TUDR subjects underwent a complete ophthalmic and fundus examination to carefully document the presence and extent of retinopathy.

### **WHI (The Women's Health Initiative)**

WHI is a long-term, prospective, multi-center cohort study investigating post-menopausal women's health in the US. WHI was funded by the National Institutes of Health and the National Heart, Lung, and Blood Institute to study strategies to prevent heart disease, breast cancer, colon cancer, and osteoporotic fractures in women 50-79 years of age. WHI involves 161,808 women recruited between 1993 and 1998 at 40 centers across the US. The study consists of two parts: the WHI Clinical Trial which was a randomized clinical trial of hormone therapy, dietary modification, and calcium/Vitamin D supplementation, and the WHI Observational Study, which focused on many of the inequities in women's health research and provided practical information about incidence, risk factors, and interventions related to heart disease, cancer, and osteoporotic fractures. For this project, we used women who self-identified as African or Hispanic and were part of the WHI SHARe (SNP Health Association Resource) study sample <https://www.nhlbi.nih.gov/whi>. The dataset includes extensive phenotypic and genotypic data on 12008 African-American and Hispanic women. After exclusions for those missing phenotype and genotype data, a maximum of 8116 African and 3463 Hispanic ancestry women were included in analyses.

Genotyping was done on the Affymetrix 6.0 platform. DNA was extracted from blood specimens collected at time of WHI enrollment. All samples, plus 2% blinded duplicates, were genotyped at Affymetrix on the Genome-wide Human SNP Array 6.0 (909,622 SNPs). Approximately 1% of samples failed genotyping; samples with call rate less than 95%, unexpected duplicates, and samples with genotype calls on the Y chromosome were further excluded. A total of 8421 African-American and 3587 Hispanic women were genotyped. A total of 119 variants on the mitochondria were available for imputation for Hispanic and African ancestry individuals. The positions of these markers was updated using the latest MT Cambridge Revised Sequence (rCRS) for Human MT-DNA in preparation for the CHARGE mtDNA+ working group imputation protocol. We used PLINK software to prepare data in binary format, SHAPEIT2 for pre-phasing mtDNA haplotypes and IMPUTE2 combined with the latest 1000 Human Genomes Reference (<ftp://ftp.1000genomes.ebi.ac.uk/vol1/ftp/release/20130502/>), April 2016 release, for performing imputation of the full mitochondrial genome. In AA, the imputation quality was 91.7%, yielding 3678 mtDNA variants. In HA, imputation quality was 91.0%, yielding 3678 mtDNA variants. After applying fcGENE to convert probabilities per cell to dosage, 525 mtDNA variants in AA and 426 mtDNA variants in HA remained polymorphic.

### **Women's Genome Health Study (WGHS)**

The Women's Genome Health Study (WGHS) is a prospective cohort of initially healthy, female North American health care professionals at least 45 years old at baseline representing participants in the Women's Health Study (WHS) who provided a blood sample at baseline and



consent for blood-based analyses. The WHS was a 2x2 trial beginning in 1992-1994 of vitamin E and low dose aspirin in prevention of cancer and cardiovascular disease with about 10 years of follow-up. Since the end of the trial, follow-up has continued in observational mode. Additional information related to health and lifestyle were collected by questionnaire throughout the WHS trial and continuing observational follow-up<sup>49</sup>.

Genotype information for mitochondria derives from the Illumina HumanExome Beadchip v.1.1 among 22,618 WGHS participants with self-reported European ancestry that was verified by genetic analysis. Genotyped samples were initially retained with >98% successful genotyping of the SNP content. Samples and SNPs were then filtered according to the best practices protocol developed by the CHARGE consortium as reported in Grove *et al.*<sup>50</sup> within GenomeStudio v. 2011.1 software. This processing incorporated data-driven definitions of SNP clusters. The results of genotype calling in GenomeStudio were output in the report format that included scaled XY experimental intensity values as well as genotype calls for input into zCall (3, version. May 8, 2012). zCall<sup>51</sup> was run to identify exclusively heterozygous genotypes deemed to have acceptable quality but excluded by cluster definitions in GenomeStudio among SNPs that were retained by the best practices protocol. Homozygotes called by zCall were not used to replace missing genotypes from GenomeStudio; and no non-missing genotypes from GenomeStudio were replaced by genotypes identified by zCall. Subsequently, an additional 1,429 SNPs were excluded with a manually-validated statistical model that used the following parameters: cluster separation in GenomeStudio, the GenomeStudio R value for the major homozygote genotypes, the minor allele frequency from GenomeStudio, and the number of missing genotypes that remained not called by zCall. The final WGHS exome chip data include the total of 22,618 WGHS participants with verified European ancestry and successful genotype for 235,667 SNPs, of which 177,812 had minor allele frequency > 0. Imputation of genotype information that was not measured directly with the Exome chip was performed as described for the CHARGE mtDNA consortium.

### **WU-HHD (Washington University Hypertensive Heart Disease Study)**

The Washington University Hypertensive Heart Disease (**WU-HHD**) study enrolled non-Hispanic Caucasian subjects (50% with Hypertension) to study the genetic determinants of hypertensive heart disease (HHD). Hypertensive and normotensive subjects representing a wide-spectrum of health traits were enrolled from 2002 to 2011. Along with demographic and anthropomorphic data, HHD and related phenotypes have been collected including ventricular and atrial structure, cardiovascular and metabolic health. The study design and methods have been previously described<sup>52</sup>. The Washington University IRB approved this study and all subjects provided written informed consent.

For the present report, we included 877 subjects enrolled and genotyped in the WU-HHD study. Genotyping was obtained by the Washington University Genome Technology Access Center (GTAC) using Affymetrix SNP Array 6.0. After genotype data QC using established procedures, we excluded related samples and poor quality arrays and retained 711 unrelated subjects for analysis. A total of 167 mitochondrial markers were initially collected from the Affymetrix SNP Array 6.0 data. The ChargeMT DNA working group protocol was applied to further process the

MT genotype data. Based on CHARGE<sub>mtDNA+</sub> WG probe blast, 95 of the 167 markers were valid and had the same position as in the Revised Cambridge Reference Sequence (rCRS) of the Human Mitochondrial DNA. These markers were further used for imputation and association analysis. Following protocols developed by the CHARGE<sub>mtDNA+</sub> working group, we first used PLINK to prepare the genotype data in binary format, and then applied shapeit2 to prophase and IMPUTE2 to finally impute the full MT genomes. A total of 3642 MT markers were imputed by IMPUTE2 using the latest 1000 Human Genomes Reference (<ftp://ftp.1000genomes.ebi.ac.uk/vol1/ftp/release/20130502/>), April 2016 release. The imputation concordance rate between original MT genotypes and the same imputed ones was 95.4%. After applying fcGENE to convert probabilities per cell to dosage, 190 markers remained polymorphic and were used in a regression based single-variant association analysis. The R package seqMeta was used to derive gene-based statistics for association testing.

## References

1. Elliott, P. *et al.* The Airwave Health Monitoring Study of police officers and staff in Great Britain: rationale, design and methods. *Environ Res* **134**, 280-5 (2014).
2. Boyd, A. *et al.* Cohort Profile: the 'children of the 90s'--the index offspring of the Avon Longitudinal Study of Parents and Children. *Int J Epidemiol* **42**, 111-27 (2013).
3. Fraser, A. *et al.* Cohort Profile: the Avon Longitudinal Study of Parents and Children: ALSPAC mothers cohort. *Int J Epidemiol* **42**, 97-110 (2013).
4. Li, Y., Willer, C.J., Ding, J., Scheet, P. & Abecasis, G.R. MaCH: using sequence and genotype data to estimate haplotypes and unobserved genotypes. *Genet Epidemiol* **34**, 816-34 (2010).
5. The Atherosclerosis Risk in Communities (ARIC) Study: design and objectives. The ARIC investigators. *Am J Epidemiol* **129**, 687-702 (1989).
6. Drivsholm, T., Ibsen, H., Schroll, M., Davidsen, M. & Borch-Johnsen, K. Increasing prevalence of diabetes mellitus and impaired glucose tolerance among 60-year-old Danes. *Diabet Med* **18**, 126-32 (2001).
7. Paternoster, L. *et al.* Genome-wide population-based association study of extremely overweight young adults--the GOYA study. *PLoS One* **6**, e24303 (2011).
8. Jorgensen, T. *et al.* A randomized non-pharmacological intervention study for prevention of ischaemic heart disease: baseline results Inter99. *Eur J Cardiovasc Prev Rehabil* **10**, 377-86 (2003).
9. Petersen, E.R. *et al.* Vejle Diabetes Biobank - a resource for studies of the etiologies of diabetes and its comorbidities. *Clin Epidemiol* **8**, 393-413 (2016).
10. InterAct, C. *et al.* Design and cohort description of the InterAct Project: an examination of the interaction of genetic and lifestyle factors on the incidence of type 2 diabetes in the EPIC Study. *Diabetologia* **54**, 2272-82 (2011).
11. Day, N. *et al.* EPIC-Norfolk: study design and characteristics of the cohort. European Prospective Investigation of Cancer. *Br J Cancer* **80 Suppl 1**, 95-103 (1999).
12. Higgins, M. *et al.* NHLBI Family Heart Study: objectives and design. *Am J Epidemiol* **143**, 1219-28 (1996).
13. Rolfe Ede, L. *et al.* Association between birth weight and visceral fat in adults. *Am J Clin Nutr* **92**, 347-52 (2010).

14. Feinleib, M., Kannel, W.B., Garrison, R.J., McNamara, P.M. & Castelli, W.P. The Framingham Offspring Study. Design and preliminary data. *Prev Med* **4**, 518-25 (1975).
15. Splansky, G.L. *et al.* The Third Generation Cohort of the National Heart, Lung, and Blood Institute's Framingham Heart Study: design, recruitment, and initial examination. *Am J Epidemiol* **165**, 1328-35 (2007).
16. Becker, D.M. & Levine, D.M. Risk perception, knowledge, and lifestyles in siblings of people with premature coronary disease. *Am J Prev Med* **3**, 45-50 (1987).
17. Becker, L.C. *et al.* Screening of asymptomatic siblings of patients with premature coronary artery disease. *Circulation* **75**, 1114-7 (1987).
18. Becker, D.M. *et al.* Risk factors in siblings of people with premature coronary heart disease. *J Am Coll Cardiol* **12**, 1273-80 (1988).
19. Blumenthal, R.S. *et al.* Exercise thallium tomography predicts future clinically manifest coronary heart disease in a high-risk asymptomatic population. *Circulation* **93**, 915-23 (1996).
20. Vaidya, D. *et al.* Incidence of coronary artery disease in siblings of patients with premature coronary artery disease: 10 years of follow-up. *Am J Cardiol* **100**, 1410-5 (2007).
21. Becker, D.M. *et al.* Sex differences in platelet reactivity and response to low-dose aspirin therapy. *JAMA* **295**, 1420-7 (2006).
22. Mathias, R.A. *et al.* A combined genome-wide linkage and association approach to find susceptibility loci for platelet function phenotypes in European American and African American families with coronary artery disease. *BMC Med Genomics* **3**, 22 (2010).
23. Daniels, P.R. *et al.* Familial aggregation of hypertension treatment and control in the Genetic Epidemiology Network of Arteriopathy (GENOA) study. *Am J Med* **116**, 676-81 (2004).
24. Morrison, A.C. *et al.* Genome scan for hypertension in nonobese African Americans: the National Heart, Lung, and Blood Institute Family Blood Pressure Program. *Am J Hypertens* **17**, 834-8 (2004).
25. Melton, L.J., 3rd. History of the Rochester Epidemiology Project. *Mayo Clin Proc* **71**, 266-74 (1996).
26. Patsch, J.R. *et al.* Relation of triglyceride metabolism and coronary artery disease. Studies in the postprandial state. *Arterioscler Thromb* **12**, 1336-45 (1992).
27. Lai, C.Q. *et al.* Fenofibrate effect on triglyceride and postprandial response of apolipoprotein A5 variants: the GOLDN study. *Arterioscler Thromb Vasc Biol* **27**, 1417-25 (2007).
28. Sorlie, P.D. *et al.* Design and implementation of the Hispanic Community Health Study/Study of Latinos. *Ann Epidemiol* **20**, 629-41 (2010).
29. Lavange, L.M. *et al.* Sample design and cohort selection in the Hispanic Community Health Study/Study of Latinos. *Ann Epidemiol* **20**, 642-9 (2010).
30. Laurie, C.C. *et al.* Detectable clonal mosaicism from birth to old age and its relationship to cancer. *Nat Genet* **44**, 642-50 (2012).
31. Laurie, C.C. *et al.* Quality control and quality assurance in genotypic data for genome-wide association studies. *Genet Epidemiol* **34**, 591-602 (2010).
32. Genomes Project, C. *et al.* An integrated map of genetic variation from 1,092 human genomes. *Nature* **491**, 56-65 (2012).
33. Williams, R.R. *et al.* NHLBI family blood pressure program: methodology and recruitment in the HyperGEN network. Hypertension genetic epidemiology network. *Ann Epidemiol* **10**, 389-400 (2000).
34. Freedman, B.I. *et al.* Genome-wide scans for heritability of fasting serum insulin and glucose concentrations in hypertensive families. *Diabetologia* **48**, 661-8 (2005).
35. Pedersen, C.B., Gotzsche, H., Moller, J.O. & Mortensen, P.B. The Danish Civil Registration System. A cohort of eight million persons. *Dan Med Bull* **53**, 441-9 (2006).

36. Sebastiani, P. *et al.* A family longevity selection score: ranking sibships by their longevity, size, and availability for study. *Am J Epidemiol* **170**, 1555-62 (2009).
37. Newman, A.B. *et al.* Health and function of participants in the Long Life Family Study: A comparison with other cohorts. *Aging (Albany NY)* **3**, 63-76 (2011).
38. Scottish Council for Research in Education. *The intelligence of Scottish children: A national survey of an age-group*, (University of London Press, London, 1933).
39. Deary, I.J., Whiteman, M.C., Starr, J.M., Whalley, L.J. & Fox, H.C. The impact of childhood intelligence on later life: Following up the Scottish Mental Surveys of 1932 and 1947. *J. Pers. Soc. Psychol.* **86**, 130-147 (2004).
40. Deary, I.J., Whalley, L.J. & Starr, J.M. *A Lifetime of Intelligence, Follow-up Studies of the Scottish Mental Surveys of 1932 and 1947*, (American Psychological Association, Washington, DC, 2009).
41. Deary, I.J. *et al.* The Lothian Birth Cohort 1936: a study to examine influences on cognitive ageing from age 11 to age 70 and beyond. *BMC Geriatr.* **7**, 28 (2007).
42. Hsueh, W.C. *et al.* Diabetes in the Old Order Amish: characterization and heritability analysis of the Amish Family Diabetes Study. *Diabetes Care* **23**, 595-601 (2000).
43. Streeten, E.A. *et al.* Reduced incidence of hip fracture in the Old Order Amish. *J Bone Miner Res* **19**, 308-13 (2004).
44. Sorkin, J. *et al.* Exploring the genetics of longevity in the Old Order Amish. *Mech Ageing Dev* **126**, 347-50 (2005).
45. Mitchell, B.D. *et al.* The genetic response to short-term interventions affecting cardiovascular function: rationale and design of the Heredity and Phenotype Intervention (HAPI) Heart Study. *Am Heart J* **155**, 823-8 (2008).
46. Shuldiner, A.R. *et al.* Association of cytochrome P450 2C19 genotype with the antiplatelet effect and clinical efficacy of clopidogrel therapy. *JAMA* **302**, 849-57 (2009).
47. Hofman, A. *et al.* The Rotterdam Study: 2016 objectives and design update. *European journal of epidemiology* **30**, 661-708 (2015).
48. Völzke *et al.* Cohort profile: the study of health in Pomerania. *Int J Epidemiol.* Apr;40(2):294-307 (2011).
49. Ridker, P.M. *et al.* Rationale, design, and methodology of the Women's Genome Health Study: a genome-wide association study of more than 25,000 initially healthy american women. *Clin Chem* **54**, 249-55 (2008).
50. Grove, M.L. *et al.* Best practices and joint calling of the HumanExome BeadChip: the CHARGE Consortium. *PLoS One* **8**, e68095 (2013).
51. Goldstein, J.I. *et al.* zCall: a rare variant caller for array-based genotyping: genetics and population analysis. *Bioinformatics* **28**, 2543-5 (2012).
52. Barve, R.A. *et al.* Genetic association of left ventricular mass assessed by M-mode and two-dimensional echocardiography. *J Hypertens* **34**, 88-96 (2016).
